# Supplementary material for: Construction on of a Ferroptosis-Related lncRNA-Based Model to Improve the Prognostic Evaluation of Gastric Cancer Patients Based on Bioinformatics
Source: Frontiers journal article supplement (doi:10.3389/fgene.2021.739470), 2021-08-23

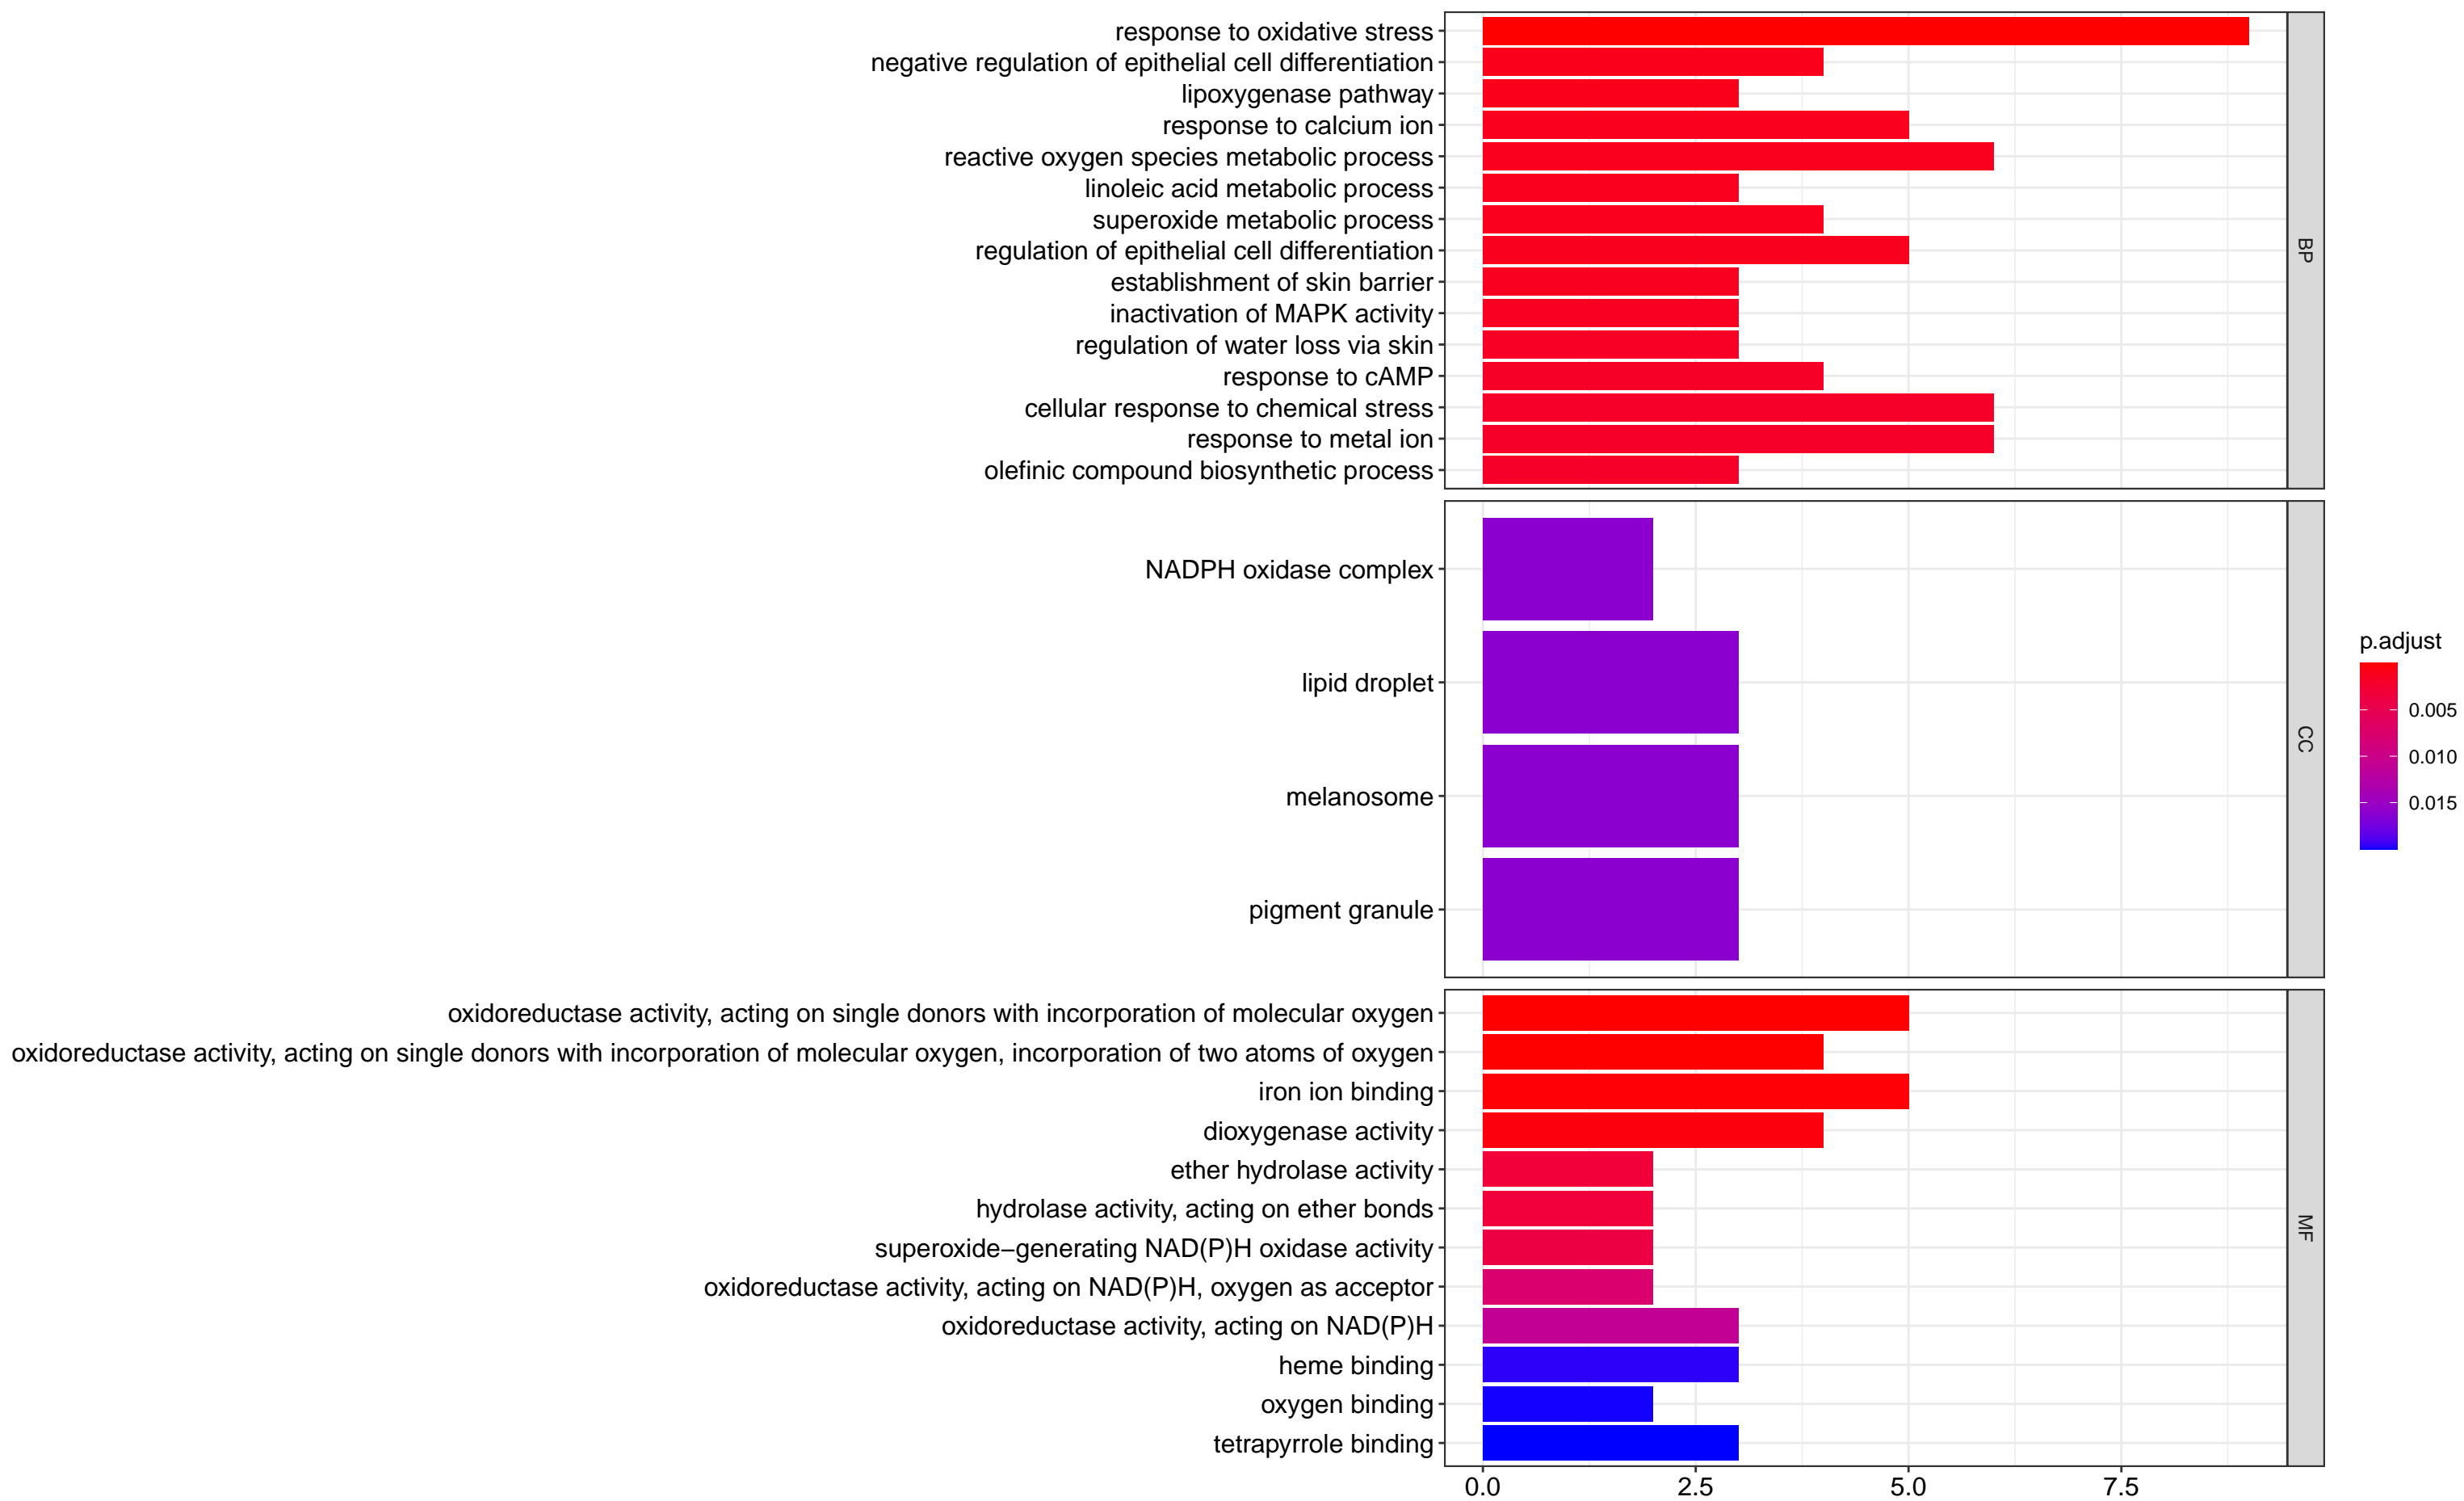

Supplement: Image_2.PDF [file Image_2.PDF]
