# Supplementary material for: Construction on of a Ferroptosis-Related lncRNA-Based Model to Improve the Prognostic Evaluation of Gastric Cancer Patients Based on Bioinformatics
Source: Front Genet. 2021 Aug 23;12:739470. doi: 10.3389/fgene.2021.739470 (PMC8419360; doi:10.3389/fgene.2021.739470)
Supplement: Supplementary Table 1 — Ferroptosis related download from FerrDb database. [file Table_1.XLSX]

## Sheet: Table S1
Table S1. Ferroptosis-related download from FerrDb database.
Types	Symbol	Name	HGNC_ID	Evidence	Test method	Test in	Test setting	Pathway	Confidence	Caution	Protein encoded	UniProtKB	PMID	Remark		Types	Molecule	Name	PubChem CID	PMID
Driver	RPL8	Ribosomal protein L8	HGNC:10368	Required in erastin-induced ferroptosis. Silencing of it conferred against erastin-induced ferroptosis.	shRNA screening, qPCR, gene silencing	Human	NRAS mutant HT-1080 fibrosarcoma cells; KRAS mutant Calu-1 non small cell lung cancer cell	RPL8 :+: Ferroptosis	Validated	_NA_	60S ribosomal protein L8	P62917 (RL8_HUMAN)	22632970	_NA_		inhibitor	Fer-1	Ferrostatin-1	4068248	22632970
Driver	IREB2	Iron response element binding protein 2	HGNC:6115	Required in erastin-induced ferroptosis. Silencing of it conferred against erastin-induced ferroptosis.	shRNA screening, qPCR, gene silencing	Human	NRAS mutant HT-1080 fibrosarcoma cells; KRAS mutant Calu-1 non small cell lung cancer cell	IREB2 :+: Ferroptosis	Validated	_NA_	Iron-responsive element-binding protein 2	P48200 (IREB2_HUMAN)	22632970	_NA_		inhibitor	DFO	Deferoxamine	2973	22632970
Driver	ATP5MC3	ATP synthase membrane subunit c locus 3	HGNC:843	Required in erastin-induced ferroptosis. Silencing of it conferred against erastin-induced ferroptosis.	shRNA screening, qPCR, gene silencing	Human	NRAS mutant HT-1080 fibrosarcoma cells; KRAS mutant Calu-1 non small cell lung cancer cell	ATP5MC3 :+: Ferroptosis	Validated	_NA_	ATP synthase F(0) complex subunit C3	P48201 (AT5G3_HUMAN)	22632970	ATP5G3 in article		inhibitor	Trolox	Trolox	40634	22632970
Driver	CS	Citrate synthase	HGNC:2422	Required in erastin-induced ferroptosis. Silencing of it conferred against erastin-induced ferroptosis.	shRNA screening, qPCR, gene silencing	Human	NRAS mutant HT-1080 fibrosarcoma cells; KRAS mutant Calu-1 non small cell lung cancer cell	CS :+: Ferroptosis	Validated	_NA_	Citrate synthase	O75390 (CISY_HUMAN)	22632970	_NA_		inhibitor	U0126	U0126	3006531	22632970
Driver	EMC2	ER membrane protein complex subunit 2	HGNC:28963	Required in erastin-induced ferroptosis. Silencing of it conferred against erastin-induced ferroptosis.	shRNA screening, qPCR, gene silencing	Human	NRAS mutant HT-1080 fibrosarcoma cells; KRAS mutant Calu-1 non small cell lung cancer cell	EMC2 :+: Ferroptosis	Validated	_NA_	ER membrane protein complex subunit 2	Q15006 (EMC2_HUMAN)	22632970	TTC35 in article		inhibitor	CHX	Cycloheximide	6197	22632970
Driver	ACSF2	Acyl-CoA synthetase family member 2	HGNC:26101	Required in erastin-induced ferroptosis. Silencing of it conferred against erastin-induced ferroptosis.	shRNA screening, qPCR, gene silencing	Human	NRAS mutant HT-1080 fibrosarcoma cells; KRAS mutant Calu-1 non small cell lung cancer cell	ACSF2 :+: Ferroptosis	Validated	_NA_	Medium-chain acyl-CoA ligase ACSF2	Q96CM8 (ACSF2_HUMAN)	22632970	_NA_		inhibitor	AOA	Aminooxyacetic acid	286	22632970
Driver	NOX1	Nicotinamide adenine dinucleotide phosphate (NADPH) oxidase (NOX) 1	HGNC:7889	Suppresses erastin-induced ferroptosis when inhibited by inhibitor.	Inhibition test by diphenylene iodonium (DPI) and GKT137831.	Human	KRAS mutant Calu-1 non small cell lung cancer cell	NOX1 :+: Ferroptosis	Deduced	The presented inhibition study is not sufficient to confirm its role in ferroptosis.	NADPH oxidase 1	Q9Y5S8 (NOX1_HUMAN)	22632970	_NA_		inhibitor	CPX	Ciclopirox olamine	38911	22632970
Driver	CYBB	Cytochrome b-245 beta chain	HGNC:2578	Suppresses erastin-induced ferroptosis when inhibited by inhibitor.	Inhibition test by diphenylene iodonium (DPI).	Human	KRAS mutant Calu-1 non small cell lung cancer cell	CYBB :+: Ferroptosis	Deduced	The presented inhibition study is not sufficient to confirm its role in ferroptosis.	Cytochrome b-245 heavy chain	P04839 (CY24B_HUMAN)	22632970	NOX2 in article		inhibitor	Ebs	Ebselen	3194	22632970
Driver	NOX3	Nicotinamide adenine dinucleotide phosphate (NADPH) oxidase (NOX) 3	HGNC:7890	Suppresses erastin-induced ferroptosis when inhibited by inhibitor.	Inhibition test by diphenylene iodonium (DPI).	Human	KRAS mutant Calu-1 non small cell lung cancer cell	NOX3 :+: Ferroptosis	Deduced	The presented inhibition study is not sufficient to confirm its role in ferroptosis.	NADPH oxidase 3	Q9HBY0 (NOX3_HUMAN)	22632970	_NA_		inhibitor	beta-ME	beta-Mercaptoethanol	1567	22632970
Driver	NOX4	Nicotinamide adenine dinucleotide phosphate (NADPH) oxidase (NOX) 4	HGNC:7891	Suppresses erastin-induced ferroptosis when inhibited by inhibitor.	Inhibition test by diphenylene iodonium (DPI) and GKT137831.	Human	KRAS mutant Calu-1 non small cell lung cancer cell	NOX4 :+: Ferroptosis	Deduced	The presented inhibition study is not sufficient to confirm its role in ferroptosis.	NADPH oxidase 4	Q9NPH5 (NOX4_HUMAN)	22632970	_NA_		inhibitor	DPI	Diphenylene iodonium	3101	22632970
Driver	NOX5	Nicotinamide adenine dinucleotide phosphate (NADPH) oxidase (NOX) 5	HGNC:14874	Suppresses erastin-induced ferroptosis when inhibited by inhibitor.	Inhibition test by diphenylene iodonium (DPI).	Human	KRAS mutant Calu-1 non small cell lung cancer cell	NOX5 :+: Ferroptosis	Deduced	The presented inhibition study is not sufficient to confirm its role in ferroptosis.	NADPH oxidase 5	Q96PH1 (NOX5_HUMAN)	22632970	_NA_		inhibitor	GKT137831	GKT137831	58496428	22632970
Driver	DUOX1	Dual oxidase 1	HGNC:3062	Suppresses erastin-induced ferroptosis when inhibited by inhibitor.	Inhibition test by diphenylene iodonium (DPI).	Human	KRAS mutant Calu-1 non small cell lung cancer cell	DUOX1 :+: Ferroptosis	Deduced	The presented inhibition study is not sufficient to confirm its role in ferroptosis.	Dual oxidase 1	Q9NRD9 (DUOX1_HUMAN)	22632970	_NA_		inhibitor	6-AN	6-aminonicotinamide	9500	22632970
Driver	DUOX2	Dual oxidase 2	HGNC:13273	Suppresses erastin-induced ferroptosis when inhibited by inhibitor.	Inhibition test by diphenylene iodonium (DPI).	Human	KRAS mutant Calu-1 non small cell lung cancer cell	DUOX2 :+: Ferroptosis	Deduced	The presented inhibition study is not sufficient to confirm its role in ferroptosis.	Dual oxidase 2	Q9NRD8 (DUOX2_HUMAN)	22632970	_NA_		inhibitor	Fer-1	Ferrostatin-1	4068248	24592866
Driver	G6PD	Glucose-6-phosphate dehydrogenase	HGNC:4057	Required in erastin-induced ferroptosis.	shRNA silencing, RT-qPCR	Human	KRAS mutant Calu-1 non small cell lung cancer cell	G6PD :+: Ferroptosis	Validated	_NA_	Glucose-6-phosphate 1-dehydrogenase	P11413 (G6PD_HUMAN)	22632970	_NA_		inhibitor	Zileuton	Zileuton	60490	26235588
Driver	PGD	Phosphoglycerate dehydrogenase	HGNC:8891	Required in erastin-induced ferroptosis.	shRNA silencing, RT-qPCR	Human	KRAS mutant Calu-1 non small cell lung cancer cell	PGD :+: Ferroptosis	Validated	_NA_	6-phosphogluconate dehydrogenase	P52209 (6PGD_HUMAN)	22632970	_NA_		inhibitor	Baicalein	5,6,7-trihydroxyflavone	5281605	27037021
Driver	VDAC2	Valtage-dependent anion channels 2	HGNC:12672	Required in erastin-induced ferroptosis.	shRNA silencing, RT-qPCR	Human	KRAS mutant Calu-1 non small cell lung cancer cell	VDAC2 :+: Ferroptosis	Validated	_NA_	Voltage-dependent anion-selective channel protein 2	P45880 (VDAC2_HUMAN)	22632970	_NA_		inhibitor	XJB-5-131	XJB-5-131	11693686	27725964
Driver	PIK3CA	Phosphatidylinositol-4,5-bisphosphate 3-kinase catalytic subunit alpha	HGNC:8975	Inhibitor blocked ferroptotic cell death.	Cell survival assays	Mice	HT22 cells	PIK3CA :-: GSH, GSH :-: Lipid ROS, Lipid ROS :+: Ferroptosis	Validated	Also involved in necrosis and apoptosis.	Phosphatidylinositol 4	P42336 (PK3CA_HUMAN)	24739485	PI3Kalpha in article		inhibitor	JP4-039	JP4-039	44596286	27725964
Driver	FLT3	Fms related tyrosine kinase 3	HGNC:3765	Inhibitor blocked ferroptotic cell death.	Cell survival assays	Mice	HT22 cells	FLT3 :+: Lipid ROS, Lipid ROS :+: Ferroptosis	Validated	Also involved in necrosis and apoptosis.	Receptor-type tyrosine-protein kinase FLT3	P36888 (FLT3_HUMAN)	24739485	_NA_		inhibitor	vitamin E	vitamin E	14985	27262435
Driver	SCP2	Sterol carrier protein 2	HGNC:10606	SCP-2 inhibitors showed anti-ferroptotic activity, which was substantiated by knocking down SCP-2 in Gpx4−/− cells.	Cell viability test, siRNA-mediated knockdown.	Mice	PZL cells	SCP2 :+: Ferroptosis	Validated	Transient effect. Other translocases may work in parallel.	Non-specific lipid-transfer protein	P22307 (NLTP_HUMAN)	25402683	_NA_		inhibitor	Fer-1	Ferrostatin-1	4068248	28386601
Driver	TP53	Tumor protein p53	HGNC:11998	Inhibits cystine uptake and sensitizes cells to ferroptosis. Erastin induced high levels of cell death in p53+/+ MEFs.	Cell death kinetics, shRNA, western blotting, RT-PCR, ChIP assay, cystine uptake assay	Human, mice	H1299, U2OS and MCF7 cells, mouse embryonic fibroblasts	TP53 :-: SLC7A11, SLC7A11 :+: Cystine, Cystine :-: Ferroptosis	Validated	The acetylation-defective mutant (p53[3KR]) also retains the ability to induce ferroptosis upon reactive oxygen species (ROS)-induced stress.	Cellular tumor antigen p53	P04637 (P53_HUMAN)	25799988	_NA_		inhibitor	Lip-1	Liproxstatin-1	135735917	28386601
Driver	ACSL4	Acyl-CoA synthetase long chain family member 4	HGNC:3571	Deletion of this gene likely suppress ferroptosis by limiting the membrane-resident pool of oxidation-sensitive fatty acids.	Retroviral-mediated insertional mutagenesis and sequencing	Human	Chronic myeloid leukemia cell line KBM7	ACSL4 :+: Ferroptosis	Predicted	Author prediction based on gene function.	Long-chain-fatty-acid--CoA ligase 4	O60488 (ACSL4_HUMAN)	25965523	_NA_		inhibitor	Lip-1	Liproxstatin-1	135735917	28489094
Driver	LPCAT3	Lysophosphatidylcholine acyltransferase 3	HGNC:30244	Deletion of this gene likely suppress ferroptosis by limiting the membrane-resident pool of oxidation-sensitive fatty acids.	Retroviral-mediated insertional mutagenesis and sequencing	Human	Chronic myeloid leukemia cell line KBM7	LPCAT3 :+: Ferroptosis	Predicted	Author prediction based on gene function.	Lysophospholipid acyltransferase 5	Q6P1A2 (MBOA5_HUMAN)	25965523	_NA_		inhibitor	LA	alpha-Lipoic acid	864	29126071
Driver	NRAS	NRAS proto-oncogene, GTPase	HGNC:7989	NRAS12V mutant protects RMS13 cells from ferroptotic cell death.	Cell viability assessed by MTT assay, western blot	Human	RMS13 cells	NRAS :+: Ferroptosis	Deduced	Inferred as a promoter because RAS mutant is resistant to ferroptosis.	GTPase NRas	P01111 (RASN_HUMAN)	26157704	_NA_		inhibitor	Puerarin	Puerarin	5281807	29427658
Driver	KRAS	KRAS proto-oncogene, GTPase	HGNC:6407	KRAS12V mutant protects RMS13 cells from ferroptotic cell death.	Cell viability assessed by MTT assay, western blot	Human	RMS13 cells	KRAS :+: Ferroptosis	Deduced	Inferred as a promoter because RAS mutant is resistant to ferroptosis.	GTPase KRas	P01116 (RASK_HUMAN)	26157704	_NA_		inhibitor	Compound 37	Fer-1 analogue 37	_NA_	30354101
Driver	HRAS	HRas proto-oncogene, GTPase	HGNC:5173	HRAS12V mutant protects RMS13 cells from ferroptotic cell death.	Cell viability assessed by MTT assay, western blot	Human	RMS13 cells	HRAS :+: Ferroptosis	Deduced	Inferred as a promoter because RAS mutant is resistant to ferroptosis.	GTPase HRas	P01112 (RASH_HUMAN)	26157704	_NA_		inhibitor	Compound 38	Fer-1 analogue 38	_NA_	30354101
Driver	TF	Transferrin	HGNC:11740	Essential for the induction of ferroptotic cell death. Transferrin can only interact with transferrin receptor and be transported into the cell when it is loaded with iron.	Killing activity	Mice	Mouse embryonic fibroblasts	TF :+: Ferroptosis	Validated	_NA_	Serotransferrin	P02787 (TRFE_HUMAN)	26166707	Transferrin in article		inhibitor	Compound 39	Fer-1 analogue 39	_NA_	30354101
Driver	TFRC	Transferrin receptor	HGNC:11763	RNAi of transferrin receptor (TfR) inhibited ferroptosis.	RNAi	Mice	Mouse embryonic fibroblasts	TFRC :+: Ferroptosis	Validated	_NA_	Transferrin receptor protein 1	P02786 (TFR1_HUMAN)	26166707	Tfr in article		inhibitor	Curcumin	Curcumin	969516	30736288
Driver	TFR2	Transferrin receptor 2	HGNC:11762	RNAi of transferrin receptor (TfR) inhibited ferroptosis.	RNAi	Mice	Mouse embryonic fibroblasts	TFR2 :+: Ferroptosis	Validated	_NA_	Transferrin receptor protein 2	Q9UP52 (TFR2_HUMAN)	26166707	Tfr in article		inhibitor	EGCG	(-)-epigallocatechin-3-gallate	65064	30736288
Driver	SLC38A1	Solute carrier family 38 member 1	HGNC:13447	RNAi knockdown markedly blocked ferroptosis.	RNAi knockdown, cell survival analysis	Mice	Mouse embryonic fibroblasts	SLC38A1 :+: Glutamine, Glutamine :+: Glutamate, Glutamate :+: alpha-Ketoglutarate, alpha-Ketoglutarate :+: Ferroptosis	Validated	_NA_	Sodium-coupled neutral amino acid transporter 1	Q9H2H9 (S38A1_HUMAN)	26166707	_NA_		inhibitor	Curcumin	Curcumin	969516	31034781
Driver	SLC1A5	Solute carrier family 1 member 5	HGNC:10943	Pharmacological inhibition by L-g-glutamyl-p-nitroanilide or RNAi knockdown markedly blocked ferroptosis.	RNAi knockdown, cell survival analysis	Mice	Mouse embryonic fibroblasts	SLC1A5 :+: Glutamine, Glutamine :+: Glutamate, Glutamate :+: alpha-Ketoglutarate, alpha-Ketoglutarate :+: Ferroptosis	Validated	_NA_	Neutral amino acid transporter B(0)	Q15758 (AAAT_HUMAN)	26166707	_NA_		inhibitor	Quercetin	Quercetin	5280343	31224575
Driver	GLS2	Glutaminase 2	HGNC:29570	Both inhibitor inhibition and gene knockdown inhibit ferroptotic cell death.	shRNA, western blot, cell viability	Mice	Mouse embryonic fibroblasts	GSL2 :+: Glutamate, Glutamate :+: Ferroptosis	Validated	_NA_	Glutaminase liver isoform	Q9UI32 (GLSL_HUMAN)	26166707	_NA_		inhibitor	Baicalein	5,6,7-trihydroxyflavone	5281605	31231224
Driver	GOT1	Glutamic-oxaloacetic transaminase 1	HGNC:4432	RNAi reduced ferroptosis.	shRNA, qPCR, cell viability	Mice	Mouse embryonic fibroblasts	GOT1 :+: alpha-Ketoglutarate, alpha-Ketoglutarate :+: Ferroptosis	Validated	_NA_	Aspartate aminotransferase	P17174 (AATC_HUMAN)	26166707	_NA_		inhibitor	Artepillin C	Artepillin C	5472440	31299294
Driver	CARS1	Cysteinyl-tRNA synthetase 1	HGNC:1493	Required for ferroptosis in diverse cell contexts. Knockdown of CARS inhibited erastin-induced death by preventing the induction of lipid reactive oxygen species, without altering iron homeostasis.	siRNA screen, shRNA, western blot, cell viability	Human, rat	HT-1080 fibrosarcoma cells,BJeLR fibroblast cells, Panc1 cells, A673 (Ewing’s sarcoma) and 143B (osteosarcoma) cells, PC12 cells	CARS1 :-: Transsulfuration pathway, Transsulfuration pathway :-: Ferroptosis	Validated	_NA_	Cysteine--tRNA ligase	P49589 (SYCC_HUMAN)	26184909	CARS in article		inhibitor	Kaempferide	Kaempferide	5281666	31299294
Driver	TP53	Tumor protein p53	HGNC:11998	Wild type p53 can induce ferroptosis upon reactive oxygen species (ROS)-induced stress.	Cell death quantification, western blot	Human	H1299 cells	TP53 :-: SLC7A11, SLC7A11 :-: Ferroptosis	Validated	_NA_	Cellular tumor antigen p53	P04637 (P53_HUMAN)	26218928	p53 in article		inhibitor	Kaempferol	Kaempferol	5280863	31299294
Driver	ALOX5	Arachidonate 5-lipoxygenase	HGNC:435	The 5-Lipoxygenase inhibitor zileuton protected HT22 neuronal cells from erastin-induced ferroptosis.	Cell Viability Assay, ROS measurement	Mice	HT22 mouse neuronal cell line	ALOX5 :+: Lipid ROS, Lipid ROS :+: Ferroptosis	Validated	_NA_	Arachidonate 5-lipoxygenase	P09917 (LOX5_HUMAN)	26235588	5-LOX in article		inhibitor	Carvacrol	Carvacrol	10364	31470002
Driver	KEAP1	Kelch like ECH associated protein 1	HGNC:23177	Knockdown of Keap1 reversed loss of p62-increased degradation of NRF2 in ferroptosis. Keap1 knockdown led to resistance to erastin-induced and sorafenib-induced growth inhibition with decreased ferroptotic events in the absence or presence of p62 knockdown.	Western blot, shRNA knockdown, cell viability	Human, mice	HepG2, Hepa1‐6, Hep3B, and SNU‐182 cells	KEAP1 :-: NFE2L2, NFE2L2 :-: Ferroptosis	Validated	_NA_	Kelch-like ECH-associated protein 1	Q14145 (KEAP1_HUMAN)	26403645	_NA_		inhibitor	Edaravone	Edaravone	4021	31479686
Driver	HMOX1	Heme oxygenase 1	HGNC:5013	Zinc protoporphyrin IX, a HO-1 inhibitor, prevented Erastin-triggered ferroptotic cancer cell death. Overexpression accelerates erastin-induced cell death.	Cell viability assay, qRT-PCR, western blot	Human, mice	HT-1080 fibrosarcoma cells, mice lung fibroblastic cells	HMOX1 :+: Lipid ROS, Lipid ROS :+: Ferroptosis	Validated	Other articles (PMID 26403645, 28515173) suggest it a suppressor.	Heme oxygenase 1	P09601 (HMOX1_HUMAN)	26405158	HO-1 in article		inhibitor	IM-93	Indolylmaleimide derivative IM-93	_NA_	31531196
Driver	TP53	Tumor protein p53	HGNC:11998	p53^3KR/3KR Xrcc4^-/- MEF cells are very sensitive to ferroptosis. Stabilized in the spleens of p53^3KR/3KR Xrcc4^-/- mice which enables to prevent the development of pro-B-cell lymphomas.	Western blot, qRT-PCR, cell viability	Mice	p53^3KR/3KR Xrcc4^-/- MEF cells, p53^3KR/3KR Xrcc4^-/- mice	TP53 :-: SLC7A11, SLC7A11 :-: Ferroptosis	Validated	_NA_	Cellular tumor antigen p53	P04637 (P53_HUMAN)	26943586	p53 in article		inhibitor	Glycyrrhizin	Glycyrrhizin	14982	31545489
Driver	TP53	Tumor protein p53	HGNC:11998	Incubation with erastin led to profound cell death in wild-type MEFs.	Cell viability assay, phase-contrast microscopy	Human, mice	Mouse embryonic fibroblasts, lymphoblastoid cell lines	TP53 :-: SLC7A11, SLC7A11 :-: Ferroptosis	Validated	_NA_	Cellular tumor antigen p53	P04637 (P53_HUMAN)	27034505	p53 in article		inhibitor	Gastrodin	Gastrodin	115067	31698019
Driver	GLS2	Glutaminase 2	HGNC:29570	Upregulated in erastin-treated wild-type MEFs, and silencing Gls2 exihibits cell death defect in wild-type MEFs treated with erastin.	Cell viability assay,western blot	Mice	Mouse embryonic fibroblasts	GLS2 :+: Ferroptosis	Validated	_NA_	Glutaminase liver isoform	Q9UI32 (GLSL_HUMAN)	27034505	_NA_		inhibitor	Rifampicin	Rifampicin	135398735	31767624
Driver	ATG5	Autophagy related 5	HGNC:589	Knockout or knockdown limited erastin-induced ferroptosis.	shRNA	Human, mice	Mouse embryonic fibroblasts, human pancreatic cancer cell lines (PANC1 and PANC2.03), and the human fibrosarcoma cell line HT-1080	ATG5 :+: Ferroptosis	Validated	_NA_	Autophagy protein 5	Q9H1Y0 (ATG5_HUMAN)	27245739	_NA_		inhibitor	Promethazine	Promethazine	4927	31767624
Driver	ATG7	Autophagy related 7	HGNC:16935	Knockout or knockdown limited erastin-induced ferroptosis.	shRNA	Human, mice	Mouse embryonic fibroblasts, human pancreatic cancer cell lines (PANC1 and PANC2.03), and the human fibrosarcoma cell line HT-1081	ATG7 :+: Ferroptosis	Validated	_NA_	Ubiquitin-like modifier-activating enzyme ATG7	O95352 (ATG7_HUMAN)	27245739	_NA_		inhibitor	Omeprazole	Omeprazole	4594	31767624
Driver	NCOA4	Nuclear receptor coactivator 4	HGNC:7671	Inhibition suppressed ferroptosis, and overexpression promoted ferroptosis.	shRNA, gene transfection	Human	PANC1 or HT-1080 cells	NCOA4 :-: FTH1, FTH1 :-: Ferroptosis	Validated	_NA_	Nuclear receptor coactivator 4	Q13772 (NCOA4_HUMAN)	27245739	_NA_		inhibitor	Indole-3-carbinol	Indole-3-carbinol	3712	31767624
Driver	TF	Transferrin	HGNC:11740	Involved in siramesine and lapatinib-induced ferroptotic cell death. Increased following treatment with lapatinib alone or in combination with siramesine. Knocking down of transferrin resulted in decreased cell death and ROS after treatment.	Western blot, densitometry quantification, siRNA, gene transfection, cell death test	Human	MDA MB 231 and SKBr3 cells	TF :+: Lipid ROS, Lipid ROS :+: Ferroptosis	Validated	_NA_	Serotransferrin	P02787 (TRFE_HUMAN)	27441659	Transferrin in article		inhibitor	Carvedilol	Carvedilol	2585	31767624
Driver	ALOX5	Arachidonate 5-lipoxygenase	HGNC:435	Silencing ALOX genes made cells resistant to ferroptosis.	qPCR	Human	G-401 cells	ALOX5 :+: PUFAs peroxidation, PUFAs peroxidation :+: Ferroptosis	Validated	_NA_	Arachidonate 5-lipoxygenase	P09917 (LOX5_HUMAN)	27506793	_NA_		inhibitor	Propranolol	Propranolol	4946	31767624
Driver	ALOX12	Arachidonate 12-lipoxygenase, 12S type	HGNC:429	Silencing ALOX genes made cells resistant to ferroptosis.	qPCR	Human	G-401 cells	ALOX12 :+: PUFAs peroxidation, PUFAs peroxidation :+: Ferroptosis	Validated	_NA_	Arachidonate 12-lipoxygenase	P18054 (LOX12_HUMAN)	27506793	_NA_		inhibitor	Estradiol	Estradiol	5757	31767624
Driver	ALOX12B	Arachidonate 12-lipoxygenase, 12R type	HGNC:430	Silencing ALOX genes made cells resistant to ferroptosis.	qPCR	Human	G-401 cells	ALOX12B :+: PUFAs peroxidation, PUFAs peroxidation :+: Ferroptosis	Validated	_NA_	Arachidonate 12-lipoxygenase	O75342 (LX12B_HUMAN)	27506793	_NA_		inducer	Erastin	Erastin	11214940	22632970
Driver	ALOX15	Arachidonate 15-lipoxygenase	HGNC:433	Silencing ALOX genes made cells resistant to ferroptosis.	qPCR	Human	G-401 cells	ALOX15 :+: PUFAs peroxidation, PUFAs peroxidation :+: Ferroptosis	Validated	_NA_	Arachidonate 15-lipoxygenase	P16050 (LOX15_HUMAN)	27506793	_NA_		inducer	Glutamate	Glutamate	_NA_	22632970
Driver	ALOX15B	Arachidonate 15-lipoxygenase type B	HGNC:434	Silencing ALOX genes made cells resistant to ferroptosis. Erastin-induced cell death was rescued by silencing either ALOX15B or ALOXE3, which supported the hypothesis that lipoxygenases are required for ferroptosis.	qPCR, siRNA	Human	G-401, BJeLR and HT-1080 cells	ALOX15B :+: PUFAs peroxidation, PUFAs peroxidation :+: Ferroptosis	Validated	_NA_	Arachidonate 15-lipoxygenase B	O15296 (LX15B_HUMAN)	27506793	_NA_		inducer	SAS	Sulfasalazine	5339	22632970
Driver	ALOXE3	Arachidonate lipoxygenase 3	HGNC:13743	Silencing ALOX genes made cells resistant to ferroptosis. Erastin-induced cell death was rescued by silencing either ALOX15B or ALOXE3, which supported the hypothesis that lipoxygenases are required for ferroptosis.	qPCR, siRNA	Human	G-401, BJeLR and HT-1080 cells	ALOXE3 :+: PUFAs peroxidation, PUFAs peroxidation :+: Ferroptosis	Validated	_NA_	Hydroperoxide isomerase ALOXE3	Q9BYJ1 (LOXE3_HUMAN)	27506793	_NA_		inducer	Sorafenib	Sorafenib	216239	23505071
Driver	PHKG2	Phosphorylase kinase catalytic subunit gamma 2	HGNC:8931	U-2-OS cells became resistant to erastin upon PHKG2 silencing. Erastin-treated HT-1080 cells were rescued by shPHKG2.	shRNA suppressor screen, qPCR, cellular iron staining, cell viability	Human	U-2-OS, HT-1080 cells	PHKG2 :+: PUFAs peroxidation, PUFAs peroxidation :+: Ferroptosis	Validated	_NA_	Phosphorylase b kinase gamma catalytic chain	P15735 (PHKG2_HUMAN)	27506793	_NA_		inducer	Erastin	Erastin	11214940	24439385
Driver	TFRC	Transferrin receptor	HGNC:11763	The gene targets of the enriched shRNAs are potential genes that positively regulate ferroptosis.	RNAi screening	Mice	Mouse embryonic fibroblasts	TFRC :+: Lipid ROS, Lipid ROS :+: Ferroptosis	Screened	_NA_	Transferrin receptor protein 1	P02786 (TFR1_HUMAN)	27514700	_NA_		inducer	RSL3	(1S,3R)-RSL3	1750826	24439385
Driver	ACO1	Aconitase 1	HGNC:117	The gene targets of the enriched shRNAs are potential genes that positively regulate ferroptosis.	RNAi screening	Mice	Mouse embryonic fibroblasts	ACO1 :+: Lipid ROS, Lipid ROS :+: Ferroptosis	Screened	_NA_	Cytoplasmic aconitate hydratase	P21399 (ACOC_HUMAN)	27514700	_NA_		inducer	Erastin	Erastin	11214940	24844246
Driver	IREB2	iron responsive element binding protein 2	HGNC:6115	The gene targets of the enriched shRNAs are potential genes that positively regulate ferroptosis.	RNAi screening	Mice	Mouse embryonic fibroblasts	IREB2 :+: Lipid ROS, Lipid ROS :+: Ferroptosis	Screened	_NA_	Iron-responsive element-binding protein 2	P48200 (IREB2_HUMAN)	27514700	_NA_		inducer	Sorafenib	Sorafenib	216239	24844246
Driver	SLC38A1	Solute carrier family 38 member 1	HGNC:13447	The gene targets of the enriched shRNAs are potential genes that positively regulate ferroptosis.	RNAi screening	Mice	Mouse embryonic fibroblasts	SLC38A1 :+: Lipid ROS, Lipid ROS :+: Ferroptosis	Screened	_NA_	Sodium-coupled neutral amino acid transporter 1	Q9H2H9 (S38A1_HUMAN)	27514700	_NA_		inducer	Sorafenib	Sorafenib	216239	25368241
Driver	GLS2	Glutaminase 2	HGNC:29570	The gene targets of the enriched shRNAs are potential genes that positively regulate ferroptosis.	RNAi screening	Mice	Mouse embryonic fibroblasts	GLS2 :+: Lipid ROS, Lipid ROS :+: Ferroptosis	Screened	_NA_	Glutaminase liver isoform	Q9UI32 (GLSL_HUMAN)	27514700	_NA_		inducer	APAP	Acetaminophen	1983	25962350
Driver	G6PDX	_NA_	_NA_	The gene targets of the enriched shRNAs are potential genes that positively regulate ferroptosis.	RNAi screening	Mice	Mouse embryonic fibroblasts	G6PDX :+: Lipid ROS, Lipid ROS :+: Ferroptosis	Screened	_NA_	_NA_	_NA_	27514700	Not found in HGNC		inducer	Artesunate	Artesunate	6917864	26097885
Driver	ULK1	Unc-51 like autophagy activating kinase 1	HGNC:12558	Potential positive regulators of ferroptosis. Knockout of ULK1 led to significantly lower levels of erastin-induced ferroptosis in a dose- and time-dependent manner.	RNAi screening, gene knockout	Mice	Mouse embryonic fibroblasts	ULK1 :+: Lipid ROS, Lipid ROS :+: Ferroptosis	Validated	_NA_	Serine/threonine-protein kinase ULK1	O75385 (ULK1_HUMAN)	27514700	_NA_		inducer	Artemisinin	Qinghaosu	68827	26407947
Driver	ATG3	Autophagy related 3	HGNC:20962	Potential positive regulators of ferroptosis. Knockout of ATG3 greatly reduced the sensitivity of MEFs to ferropotosis, and reconstituting ATG3 back to these cells restored the ferroptosis sensitivity.	RNAi screening, gene knockout	Mice	Mouse embryonic fibroblasts	ATG3 :+: Lipid ROS, Lipid ROS :+: Ferroptosis	Validated	_NA_	Ubiquitin-like-conjugating enzyme ATG3	Q9NT62 (ATG3_HUMAN)	27514700	_NA_		inducer	Artenimol	Artenimol	3000518	26407947
Driver	ATG4D	Autophagy related 4D cysteine peptidase	HGNC:20789	Potential positive regulators of ferroptosis.	RNAi screening	Mice	Mouse embryonic fibroblasts	ATG4D :+: Lipid ROS, Lipid ROS :+: Ferroptosis	Screened	_NA_	Cysteine protease ATG4D	Q86TL0 (ATG4D_HUMAN)	27514700	_NA_		inducer	FINO2	1,2-dioxolane	138198	26797166
Driver	ATG5	Autophagy related 5	HGNC:589	Potential positive regulators of ferroptosis. Knockout of ATG5 led to significantly lower levels of erastin-induced ferroptosis in a dose- and time-dependent manner.	RNAi screening	Mice	Mouse embryonic fibroblasts	ATG5 :+: Lipid ROS, Lipid ROS :+: Ferroptosis	Validated	_NA_	Autophagy protein 5	Q9H1Y0 (ATG5_HUMAN)	27514700	_NA_		inducer	ART	Artesunate	6917864	26878598
Driver	BECN1	Beclin 1	HGNC:1034	Potential positive regulators of ferroptosis.	RNAi screening	Mice	Mouse embryonic fibroblasts	BECN1 :+: Lipid ROS, Lipid ROS :+: Ferroptosis	Screened	_NA_	Beclin-1	Q14457 (BECN1_HUMAN)	27514700	_NA_		inducer	CN-A	Cotylenin A	5477444	27375275
Driver	MAP1LC3A	Microtubule associated protein 1 light chain 3 alpha	HGNC:6838	Potential positive regulators of ferroptosis.	RNAi screening	Mice	Mouse embryonic fibroblasts	MAP1LC3A :+: Lipid ROS, Lipid ROS :+: Ferroptosis	Screened	_NA_	Microtubule-associated proteins 1A/1B light chain 3A	Q9H492 (MLP3A_HUMAN)	27514700	_NA_		inducer	PEITC	Phenethyl isothiocyanate	16741	27375275
Driver	GABARAPL2	GABA type A receptor associated protein like 2	HGNC:13291	Potential positive regulators of ferroptosis.	RNAi screening	Mice	Mouse embryonic fibroblasts	GABARAPL2 :+: Lipid ROS, Lipid ROS :+: Ferroptosis	Screened	_NA_	Gamma-aminobutyric acid receptor-associated protein-like 2	P60520 (GBRL2_HUMAN)	27514700	_NA_		inducer	Siramesine	Siramesine	9829526	27441659
Driver	GABARAPL1	GABA type A receptor associated protein like 1	HGNC:4068	Potential positive regulators of ferroptosis.	RNAi screening	Mice	Mouse embryonic fibroblasts	GABARAPL1 :+: Lipid ROS, Lipid ROS :+: Ferroptosis	Screened	_NA_	Gamma-aminobutyric acid receptor-associated protein-like 1	Q9H0R8 (GBRL1_HUMAN)	27514700	_NA_		inducer	Lapatinib	Lapatinib	208908	27441659
Driver	ATG16L1	Autophagy related 16 like 1	HGNC:21498	Potential positive regulators of ferroptosis.	RNAi screening	Mice	Mouse embryonic fibroblasts	ATG16L1 :+: Lipid ROS, Lipid ROS :+: Ferroptosis	Screened	_NA_	Autophagy-related protein 16-1	Q676U5 (A16L1_HUMAN)	27514700	_NA_		inducer	DHA	Dihydroartemisinin	3000518	27477901
Driver	WIPI1	WD repeat domain, phosphoinositide interacting 1	HGNC:25471	Potential positive regulators of ferroptosis.	RNAi screening	Mice	Mouse embryonic fibroblasts	WIPI1 :+: Lipid ROS, Lipid ROS :+: Ferroptosis	Screened	_NA_	WD repeat domain phosphoinositide-interacting protein 1	Q5MNZ9 (WIPI1_HUMAN)	27514700	_NA_		inducer	MPP+	1-methyl-4-phenylpyridinium	39484	28250973
Driver	WIPI2	WD repeat domain, phosphoinositide interacting 2	HGNC:32225	Potential positive regulators of ferroptosis.	RNAi screening	Mice	Mouse embryonic fibroblasts	WIPI2 :+: Lipid ROS, Lipid ROS :+: Ferroptosis	Screened	_NA_	WD repeat domain phosphoinositide-interacting protein 2	Q9Y4P8 (WIPI2_HUMAN)	27514700	_NA_		inducer	Haloperidol	Haloperidol	3559	28756230
Driver	SNX4	Sorting nexin 4	HGNC:11175	Potential positive regulators of ferroptosis.	RNAi screening	Mice	Mouse embryonic fibroblasts	SNX4 :+: Lipid ROS, Lipid ROS :+: Ferroptosis	Screened	_NA_	Sorting nexin-4	O95219 (SNX4_HUMAN)	27514700	_NA_		inducer	Siramesine	Siramesine	9829526	28827805
Driver	ATG13	Autophagy related 13	HGNC:29091	Knockout of ATG13 greatly reduced the sensitivity of MEFs to ferropotosis, and reconstituting ATG13 back to these cells restored the ferroptosis sensitivity.	Gene knockout	Mice	Mouse embryonic fibroblasts	ATG13 :+: Lipid ROS, Lipid ROS :+: Ferroptosis	Validated	_NA_	Autophagy-related protein 13	O75143 (ATG13_HUMAN)	27514700	_NA_		inducer	Lapatinib	Lapatinib	208908	28827805
Driver	ULK2	Unc-51 like autophagy activating kinase 2	HGNC:13480	Knockout of ULK2 led to significantly lower levels of erastin-induced ferroptosis in a dose- and time-dependent manner.	Gene knockout	Mice	Mouse embryonic fibroblasts	ULK2 :+: Lipid ROS, Lipid ROS :+: Ferroptosis	Validated	_NA_	Serine/threonine-protein kinase ULK2	Q8IYT8 (ULK2_HUMAN)	27514700	_NA_		inducer	Salinomycin	Salinomycin	3085092	28937680
Driver	NCOA4	Nuclear receptor coactivator 4	HGNC:7671	Elimination of NCOA4 expression by RNAi knockdown significantly block ferroptosis	RNAi knockdown, western blot	Human, mice	Mouse embryonic fibroblasts and HT1080 cells	NCOA4 :+: Lipid ROS, Lipid ROS :+: Ferroptosis	Validated	_NA_	Nuclear receptor coactivator 4	Q13772 (NCOA4_HUMAN)	27514700	_NA_		inducer	Piperlongumine	Piperlongumine	637858	29393418
Driver	ACSL4	Acyl-CoA synthetase long chain family member 4	HGNC:3571	Knockdown inhibited erastin-induced ferroptosis, whereas overexpression restored ferroptosis sensitization.	shRNA, gene transfection, western blot	Human	LNCaP (human prostate cancer cells), K562 (human erythromyeloblastoid leukemia cell line), HepG2 (human hepatocellular cells), and HL60 (human promyelocytic leukemia cells)	ACSL4 :+: 5-HETE, 5-HETE :+: Ferroptosis	Validated	_NA_	Long-chain-fatty-acid--CoA ligase 4	O60488 (ACSL4_HUMAN)	27565726	_NA_		inducer	FINO2	1,2-dioxolane	138198	29610484
Driver	TP53	Tumor protein p53	HGNC:11998	p53 acetylation has a critical role in ferroptotic responses. Simultaneous loss of K98/117/161/162 acetylations is unable to induce ferroptosis, and its ability to thwart cancer growth is also abrogated.	Mass spectrometry screening, western blot, cell death assay	Human, mice	H1299 cells, mouse xenograft models	TP53 :-: SLC7A11, SLC7A11 :-: Ferroptosis	Validated	_NA_	Cellular tumor antigen p53	P04637 (P53_HUMAN)	27705786	_NA_		inducer	PAB	Pseudolaric acid B	71307573	29702192
Driver	SAT1	Spermidine/spermine N1-acetyltransferase 1	HGNC:10540	p53-mediated activation of SAT1 contributes to ferroptotic cell death in the presence of ROS stress. Knockdown of Sat1 partially rescued ROS-induced ferroptosis.	qRT-PCR, siRNA, CRISPR-cas9, western blot	Human, mice	H1299, U2OS cells, mouse embryonic fibroblasts, mouse xenograft	SAT1 :+: ALOX15, ALOX15 :+: Lipid ROS, Lipid ROS :+: Ferroptosis	Validated	Activated by p53.	Diamine acetyltransferase 1	P21673 (SAT1_HUMAN)	27698118	_NA_		inducer	D13	Albiziabioside A derivative D13	_NA_	30142612
Driver	ALOX15	Arachidonate 15-lipoxygenase	HGNC:433	SAT1- and ROS-induced ferroptosis was completely abrogated by PD146176, an ALOX15-specific inhibitor.	Cell death count, qRT-PCR, siRNA	Human	H1299, U2OS cells	ALOX15 :+: Lipid ROS, Lipid ROS :+: Ferroptosis	Validated	_NA_	Arachidonate 15-lipoxygenase	P16050 (LOX15_HUMAN)	27698118	_NA_		inducer	Epunctanone	Epunctanone	_NA_	30195869
Driver	ACSL4	Acyl-CoA synthetase long chain family member 4	HGNC:3571	Inhibition of ACSL4 was effective in protecting against RSL3-induced cell death. Acsl4 KO cells are resistant to ferroptosis.	Cell death count, LC-MS/MS, fluorescence imaging	Mice	Mouse embryonic fibroblasts (Pfa1 cells)	ACSL4 :+: PE, PE :+: Ferroptosis	Validated	_NA_	Long-chain-fatty-acid--CoA ligase 4	O60488 (ACSL4_HUMAN)	27842066	_NA_		inducer	SRS 16-86	SRS 16-86	_NA_	30352209
Driver	LPCAT3	Lysophosphatidylcholine acyltransferase 3	HGNC:30244	Knockdown of Lpcat3 increased resistance to ferroptosis triggered by RSL3.	shRNA	Mice	Mouse lung epithelial (MLE) and embryonic cells	LPCAT3 :+: Ferroptosis	Validated	_NA_	Lysophospholipid acyltransferase 5	Q6P1A2 (MBOA5_HUMAN)	27842066	_NA_		inducer	RSL3	(1S,3R)-RSL3	1750826	30524291
Driver	ALOX15	Arachidonate 15-lipoxygenase	HGNC:433	Liproxstatin-1 inhibited the 15-LOX enzymatic activity and suppressed ferroptosis.	Identification of oxygenated PE	Mice	Kidney of GPX4-deficient mice	ALOX15 :+: PE, PE :+: Ferroptosis	Validated	_NA_	Arachidonate 15-lipoxygenase	P16050 (LOX15_HUMAN)	27842066	15-LOX in article		inducer	Artesunate	Artesunate	6917864	30551460
Driver	ACSL4	Acyl-CoA synthetase long chain family member 4	HGNC:3571	An essential proferroptotic gene. Re-expression of Flag-tagged human wild-type (WT) ACSL4 (ACSL4-Flag) in Acsl4 KO Pfa1 cells restored full sensitivity to ferroptosis induction. Inhibition showed significantly prolonged survival compared to vehicle-treated mice.	Cell viability, immunoblot, lipid peroxidation assessment, CRISPR–Cas9, qPCR, microarray, RNA-seq	Human, mice	Mouse embryonic fibroblasts (Pfa1 cells), human breast cancer cell lines, Gpx4 KO mice	ACSL4 :+: Ferroptosis	Validated	_NA_	Long-chain-fatty-acid--CoA ligase 4	O60488 (ACSL4_HUMAN)	27842070	_NA_		inducer	DHA	Dihydroartemisinin	3000518	30557609
Driver	KEAP1	Kelch like ECH associated protein 1	HGNC:23177	Keap 1 silencing decreased ferroptosis.	Cell viability assay, western blot, siRNA	Mice	Head and neck cancer cells, nude mice	KEAP1 :-: NFE2L2, NFE2L2 :-: Ferroptosis	Validated	_NA_	Kelch-like ECH-associated protein 1	Q14145 (KEAP1_HUMAN)	28012440	_NA_		inducer	IKE	Imidazole ketone erastin	91824786	30799221
Driver	EGFR	Epidermal growth factor receptor	HGNC:3236	Cell death in activated EGFR mutant cells occurs by ferroptosis. Inhibiting EGFR and MAPK signaling rescued cell viability following cystine withdrawal.	Fluorescence-activated cell sorting (FACS) analysis, cell viability	Human	Human mammary epithelial) cells	EGFR :+: MAPK, MAPK :+: Ferroptosis	Validated	_NA_	Epidermal growth factor receptor	P00533 (EGFR_HUMAN)	28297659	_NA_		inducer	Ferroptocide	Ferroptocide	_NA_	31086302
Driver	NOX4	NADPH oxidase 4	HGNC:7891	Inhibition of NADPH oxidase 4 (NOX4) blocked ferroptosis.	Fluorescence-activated cell sorting (FACS) analysis, cell viability	Human	Human mammary epithelial) cells	NOX4 :+: Lipid ROS, Lipid ROS :+: Ferroptosis	Validated	_NA_	NADPH oxidase 4	Q9NPH5 (NOX4_HUMAN)	28297659	_NA_		inducer	DHA	Dihydroartemisinin	3000518	31114026
Driver	MAPK3	Mitogen-activated protein kinase 3	HGNC:6877	Inhibiting EGFR and MAPK signaling rescued cell viability following cystine withdrawal.	Immunoblots, lucifer yellow infiltration, cell viability, fluorescence-activated cell sorting (FACS) analysis	Human	Human mammary epithelial) cells	MAPK :-: GPX4, GPX4 :-: Lipid ROS, MAPK :+: NOX4, NOX4 :+: H2O2, H2O2 :+: Lipid ROS, Lipid ROS :+: Ferroptosis	Validated	_NA_	Mitogen-activated protein kinase 3	P27361 (MK03_HUMAN)	28297659	ERK1 in article		inducer	SAS	Sulfasalazine	5339	31173262
Driver	MAPK1	Mitogen-activated protein kinase 1	HGNC:6871	Inhibiting EGFR and MAPK signaling rescued cell viability following cystine withdrawal.	Immunoblots, lucifer yellow infiltration, cell viability, fluorescence-activated cell sorting (FACS) analysis	Human	Human mammary epithelial) cells	MAPK :-: GPX4, GPX4 :-: Lipid ROS, MAPK :+: NOX4, NOX4 :+: H2O2, H2O2 :+: Lipid ROS, Lipid ROS :+: Ferroptosis	Validated	_NA_	Mitogen-activated protein kinase 1	P28482 (MK01_HUMAN)	28297659	ERK2 in article		inducer	Typhaneoside	Typhaneoside	6326228	31301767
Driver	BID	BH3 interacting domain death agonist	HGNC:1050	BID deletion prevents erastin- and glutamate-induced cell death. BID inhibition inhibited erastin-induced ferroptosis.	Cell viability, western blot, CRISPR/Cas9, gene transfection	Mice	HT-22 cells, mouse embryonic fibroblasts	BID :+: Ferroptosis	Validated	_NA_	BH3-interacting domain death agonist	P55957 (BID_HUMAN)	28384611	_NA_		inducer	Neratinib	Neratinib	9915743	31409375
Driver	ACSL4	Acyl-CoA synthetase long chain family member 4	HGNC:3571	Knockout of Acsl4 in ferroptosis-sensitive cells conferred protection from erastin- and RSL3-induced cell death.	CRISPR/Cas9, western blotting, cell death assessment	Human, mice	NIH3T3, HT-29, HT-1080 and L929 cells	ACSL4 :+: Ferroptosis	Validated	_NA_	Long-chain-fatty-acid--CoA ligase 4	O60488 (ACSL4_HUMAN)	28551825	_NA_		inducer	MNPE	1-Methylnaphthalene-4-propionate endoperoxide	13640687	31445701
Driver	ZEB1	Zinc finger E-box binding homeobox 1	HGNC:11642	Knockout of ZEB1 prevents cell death induced by GPX4 inhibition.	sgRNA, cell viability	Human	KP4 pancreatic cancer cells	ZEB1 :+: Lipid ROS, Lipid ROS :+: Ferroptosis	Validated	_NA_	Zinc finger E-box-binding homeobox 1	P37275 (ZEB1_HUMAN)	28678785	_NA_		inducer	GA	Gallic acid	370	31455047
Driver	KEAP1	Kelch like ECH associated protein 1	HGNC:23177	Keap1 inhibition promotes resistance to ferroptosis.	Cell viability analysis	Human, rat	F98, U87 glioma cells	KEAP1 :+: Ferroptosis	Validated	_NA_	Kelch-like ECH-associated protein 1	Q14145 (KEAP1_HUMAN)	28805788	_NA_		inducer	DHA	Dihydroartemisinin	3000518	31519193
Driver	DPP4	Dipeptidyl peptidase 4	HGNC:3009	Required for ferroptosis in TP53-deficient CRC cells.	Cell death, RNAi, western blot, enzyme activity	Human, mice	TP53-/- HCT116 cells, athymic nude mice	DPP4 :+: Lipid ROS, Lipid ROS :+: Ferroptosis	Validated	_NA_	Dipeptidyl peptidase 4	P27487 (DPP4_HUMAN)	28813679	_NA_		inducer	Artesunate	Artesunate	6917864	31537387
Driver	ALOX15	Arachidonate 15-lipoxygenase	HGNC:433	Suppression of ferroptosis following ALOX15 silencing was detected in cancer cells. Cells with exogenous expression of ALOX15 had an increased cell death rate following RSL3 treatment.	siRNA, transfection, western blot, cellular lipoxygenase assay	Human	HT1080, Panc‐1, Calu‐1 cells	ALOX15 :+: Ferroptosis	Validated	_NA_	Arachidonate 15-lipoxygenase	P16050 (LOX15_HUMAN)	28837253	_NA_		inducer	APAP	Acetaminophen	1983	31541463
Driver	ALOX12	Arachidonate 12-lipoxygenase, 12S type	HGNC:429	12‐LOX inhibitors prevented cell death, whereas ALOX12 overexpression significantly enhanced cell death. ALOX12 expression was gradually elevated during the erastin or RSL3 treatments, and was stable in the late stage of ferroptosis.	siRNA, transfection, western blot, cellular lipoxygenase assay	Human	HT1080, Panc‐1, Calu‐1 cells	ALOX12 :+: Ferroptosis	Validated	_NA_	Arachidonate 12-lipoxygenase	P18054 (LOX12_HUMAN)	28837253	_NA_		inducer	D-2-HG	D-2-hydroxyglutarate	439391	31591388
Driver	CDKN2A	Cyclin dependent kinase inhibitor 2A	HGNC:1787	Combination of ARF induction and ROS treatment induced ferroptotic cell death. Knockdown of endogenous ARF protected cells from ROS-induced cell death.	RNAi, immunoblot, phase-contrast image, cell death quantification	Human, mice	H1299, SaoS2, U2OS cells, mouse embryonic fibroblasts	CDKN2A :-: NFE2L2, NFE2L2 :+: SLC7A11, SLC7A11 :-: Ferroptosis, CDKN2A :+: p53, p53 :-: SLC7A11, SLC7A11 :-: Ferroptosis	Validated	_NA_	Cyclin-dependent kinase inhibitor 2A	P42771 (CDN2A_HUMAN)	28985506	ARF in article		inducer	PG	8-O-beta-glucopyranoside	101159014	31606381
Driver	PEBP1	Phosphatidylethanolamine binding protein 1	HGNC:8630	Elevated levels of PEBP1 resulted in increased sensitivity of HK2 cells to RSL3 whereas lowered contents of PEBP1 in HAEC and HT22 cells were associated with decreased sensitivity to ferroptosis.	Western blot, siRNA, cell death assay	Human, mice	HK2, HAEC and HT22 cells	(PEBP1/15LO) :+: Ferroptosis	Validated	_NA_	Phosphatidylethanolamine-binding protein 1	P30086 (PEBP1_HUMAN)	29053969	_NA_		inducer	Siramesine	Siramesine	9829526	31636810
Driver	SOCS1	Suppressor of cytokine signaling 1	HGNC:19383	Expression of SOCS1 sensitized cells to ferroptosis inducer. This effect of SOCS1 was efficiently blocked by ferroptosis inhibitor. Expression of SOCS1 reduced the levels of GSH, explaining in part its ability to sensitize cells to ferroptosis.	Cell death assay, cell viability assay, qPCR	Human	U2OS or IMR90 cells	SOCS1 :+: p53, p53 :-: SLC7A11, SLC7A11 :+: GSH, GSH :-: Ferroptosis	Validated	_NA_	Suppressor of cytokine signaling 1	O15524 (SOCS1_HUMAN)	29081404	_NA_		inducer	Lapatinib	Lapatinib	208908	31636810
Driver	CDO1	Cysteine dioxygenase type 1	HGNC:1795	CDO1 suppression contributes to ferroptosis resistance.	siRNA, western blot, MTT assay	Human	Gastric cancer cells AGS, BGC823, athymic nude mice	CDO1 :-: GPX4, GPX4 :-: Ferroptosis	Validated	_NA_	Cysteine dioxygenase type 1	Q16878 (CDO1_HUMAN)	29144989	_NA_		inducer	DT	Dihydroisotanshinone I	89406	31736748
Driver	MYB	MYB proto-oncogene, transcription factor	HGNC:7545	Erastin-induced ferroptosis was restrained when c-Myb was suppressed.	Western blot, siRNA, qRT-PCR, MTT assay	Human	Gastric cancer cells AGS, BGC823, MKN45, SGC7901, and MGC803	MYB :+: CDO1, CDO1 :-: GPX4, GPX4 :-: Ferroptosis	Validated	_NA_	Transcriptional activator Myb	P10242 (MYB_HUMAN)	29144989	C-Myb in article		inducer	Acrolein	Acrolein	7847	31887216
Driver	HMOX1	Heme oxygenase 1	HGNC:5013	Inhibiting HO-1 effectively attenuated BAY-induced ferroptotic cell death. Defective HO-1 expression significantly rescued cell survival suppressed by BAY.	Cell viability assay, qRT-PCR, shRNA, gene overexpression, western blot	Human	MDA-MB-231, MDA-MB-468	HMOX1 :+: Ferroptosis	Validated	_NA_	Heme oxygenase 1	P09601 (HMOX1_HUMAN)	29274359	HO-1 in article		inducer	Ruscogenin	Ruscogenin	441893	31894321
Driver	MAPK8	Mitogen-activated protein kinase 8	HGNC:6881	JNK1/2 inhibitors inhibited t-BHP-induced ferroptosis. t-BHP treatment significantly increased the protein expression of p-JNK.	MitoSOX probe, luminometer kit, C11-BODIPY probe, western blot	Rat	PC12 cells	MAPK8 :+: Lipid ROS, Lipid ROS :+: Ferroptosis	Validated	_NA_	Mitogen-activated protein kinase 8	P45983 (MK08_HUMAN)	29330409	JNK1 in article		inducer	Erastin	Erastin	11214940	31897145
Driver	MAPK9	Mitogen-activated protein kinase 9	HGNC:6886	JNK1/2 inhibitors inhibited t-BHP-induced ferroptosis. t-BHP treatment significantly increased the protein expression of p-JNK.	MitoSOX probe, luminometer kit, C11-BODIPY probe, western blot	Rat	PC12 cells	MAPK9 :+: Lipid ROS, Lipid ROS :+: Ferroptosis	Validated	_NA_	Mitogen-activated protein kinase 9	P45984 (MK09_HUMAN)	29330409	JNK2 in article		inducer	sorafenib	Sorafenib	216239	31897145
Driver	MAPK1	Mitogen-activated protein kinase 1	HGNC:6871	ERK1/2 inhibitors inhibited t-BHP-induced ferroptosis. t-BHP treatment significantly increased the protein expression of p-ERK.	MitoSOX probe, luminometer kit, C11-BODIPY probe, western blot	Rat	PC12 cells	MAPK1 :+: Lipid ROS, Lipid ROS :+: Ferroptosis	Validated	_NA_	Mitogen-activated protein kinase 1	P28482 (MK01_HUMAN)	29330409	ERK2 in article
Driver	MAPK3	Mitogen-activated protein kinase 3	HGNC:6877	ERK1/2 inhibitors inhibited t-BHP-induced ferroptosis. t-BHP treatment significantly increased the protein expression of p-ERK.	MitoSOX probe, luminometer kit, C11-BODIPY probe, western blot	Rat	PC12 cells	MAPK3 :+: Lipid ROS, Lipid ROS :+: Ferroptosis	Validated	_NA_	Mitogen-activated protein kinase 3	P27361 (MK03_HUMAN)	29330409	ERK1 in article
Driver	SLC1A5	Solute carrier family 1 member 5	HGNC:10943	Overexpression of SLC1A5 restored miR-137-mediated ferroptosis suppression.	Cell viability assay, lipid ROS assay, western blot, gene overexpression, shRNA	Human	Melanoma cell lines A375 and G-361	SLC1A5 :+: Glutaminolysis, Glutaminolysis :+: Lipid ROS, Lipid ROS :+: Ferroptosis	Validated	_NA_	Neutral amino acid transporter B(0)	Q15758 (AAAT_HUMAN)	29348676	_NA_
Driver	CHAC1	ChaC glutathione specific gamma-glutamylcyclotransferase 1	HGNC:28680	CHAC1 degradation of GSH might enhance cystine-starvation-induced cell death.	Western blot, real-time PCR, cell viability assay, siRNA, GSH assay kit	Human	MDA-MB-231, Hs 578T, and HCC 1937 cells	CHAC1 :-: GSH, GSH :-: Ferroptosis	Validated	_NA_	Glutathione-specific gamma-glutamylcyclotransferase 1	Q9BUX1 (CHAC1_HUMAN)	29383104	_NA_
Driver	MAPK14	Mitogen-activated protein kinase 14	HGNC:6876	Ferroptosis was blocked by inhibiting p38 MAPK activation.	Cell viability assay, lipid ROS measurement, RT-qPCR, western blot	Mice	TM4 Sertoli cells	MAPK14 :+: Ferroptosis	Validated	_NA_	Mitogen-activated protein kinase 14	Q16539 (MK14_HUMAN)	29436589	p38 MAPK in article
Driver	LINC00472	Long intergenic non-protein coding RNA 472	HGNC:21380	Increases erastin-induced growth inhibition, whereas depletion of P53RRA decreased erastin-induced growth inhibition.	Bisulfite sequencing, RNA pull-down, mass spectrometry, RNA immunoprecipitation, qRT-PCR, cell viability assay	Human	Lung cancer A549, SPCA1, and H522 cells	LINC00472 :+: p53, p53 :+: Ferroptosis	Validated	Also triggers apoptosis.	Putative uncharacterized protein encoded by LINC00472	Q9H8W2 (CF155_HUMAN)	29588351	P53RRA in article
Driver	NOX4	NADPH oxidase 4	HGNC:7891	Activated Nox4 contributes to PAB-induced ferroptotic cell death. knockdown made cells resistant to PAB-induced death.	Western blot, LDH release assay, siRNA, cell death, siRNA	Human, rat	Rat C6, human SHG-44, U87 and U251 glioma cells	NOX4 :+: H2O2, H2O2 :+: Lipid ROS, Lipid ROS :+: Ferroptosis	Validated	_NA_	NADPH oxidase 4	Q9NPH5 (NOX4_HUMAN)	29702192	_NA_
Driver	GOT1	Glutamic-oxaloacetic transaminase 1	HGNC:4432	Overexpression of miR‐9 suppressed GOT1, which subsequently reduced ferroptosis. Overexpression of GOT1 restored miR‐9 mediated ferroptosis suppression.	Immunoblotting, luciferase reporter assay, qPCR, cell viability assay, MDA assay, iron assay, glutamate assay	Human	A375 and G‐361 cells	GOT1 :+: alpha KG, alpha KG :+: Lipid ROS, Lipid ROS :+: Ferroptosis	Validated	_NA_	Aspartate aminotransferase	P17174 (AATC_HUMAN)	30035324	_NA_
Driver	BECN1	Beclin 1	HGNC:1034	Knockdown inhibits ferroptosis. Overexpression increases ferroptotic cancer cell death.	shRNA, western blot, cell viability assay, gene overexpression	Human, mice	HCT116, CX-1, PANC1, HT1080, and Calu-1 cells, athymic nude immunodeficient mice	BECN1 :-: System Xc-, System Xc- :+: GSH, GSH :-: Lipid ROS, Lipid ROS :+: Ferroptosis	Validated	_NA_	Beclin-1	Q14457 (BECN1_HUMAN)	30057310	_NA_
Driver	PRKAA2	Protein kinase AMP-activated catalytic subunit alpha 2	HGNC:9377	Inhibition of PRKAA/AMPKalpha diminishes ferroptosis.	siRNA, western blot, cell viability assay, GSH assay, lipid peroxidation assay, iron assay	Human	HCT116 and CX-1 cells	PRKAA2 :+: (BECN1/SLC7A11), (BECN1/SLC7A11) :+: Ferroptosis	Validated	_NA_	5'-AMP-activated protein kinase catalytic subunit alpha-2	P54646 (AAPK2_HUMAN)	30057310	PRKAA in article
Driver	PRKAA1	Protein kinase AMP-activated catalytic subunit alpha 1	HGNC:9376	Inhibition of PRKAA/AMPKalpha diminishes ferroptosis.	siRNA, western blot, cell viability assay, GSH assay, lipid peroxidation assay, iron assay	Human	HCT116 and CX-1 cells	PRKAA1 :+: (BECN1/SLC7A11), (BECN1/SLC7A11) :+: Ferroptosis	Validated	_NA_	5'-AMP-activated protein kinase catalytic subunit alpha-1	Q13131 (AAPK1_HUMAN)	30057310	AMPK alpha in article
Driver	ELAVL1	ELAV like RNA binding protein 1	HGNC:3312	ELAVL1 siRNA led to ferroptosis resistance, whereas ELAVL1 plasmid contributed to classical ferroptotic events.	Immunohistochemistry, hydroxyproline assay, immunofluorescence, cell viability assay, western blot, qPCR, iron assay, ROS assay, RNAi	Human, mice	Human liver specimens and hepatic stellate cell; C57BL/6 mice; mouse hepatocyte and hepatic stellate cell; HSC-LX2 and HSC-T6 cells	ELAVL1 :+: Ferroptosis	Validated	_NA_	ELAV-like protein 1	Q15717 (ELAV1_HUMAN)	30081711	_NA_
Driver	BAP1	BRCA1 associated protein 1	HGNC:950	Suppresses SLC7A11-mediated cystine uptake and promotes ferroptosis. BAP1 mutants lose their abilities to repress SLC7A11 and to promote ferroptosis.	Flow cytometry, cell viability assay, cell death assay, western blot, gene knockout, lipid peroxidation assay, cystine uptake assay, GSH assay, RT-PCR, ChIP-qPCR, luciferase reporter assay, immunoprecipitation, IHC, ChIP-seq	Human	HEK-293T, Caki1, 786-O, 769-P, ACHN and NCI-H226 cell lines; RCC4, UMRC2, SLR20, and UMRC6 cell lines; TK10 cell line; athymic nude mice	BAP1 :-: SLC7A11, SLC7A11 :-: Lipid ROS, Lipid ROS :+: Ferroptosis	Validated	_NA_	Ubiquitin carboxyl-terminal hydrolase BAP1	Q92560 (BAP1_HUMAN)	30202049	_NA_
Driver	TP53	Tumor protein p53	HGNC:11998	Facilitates ART-induced ferroptosis. Conversely, knockdown of P53 blocked ART-induced ferroptosis.	Western blot, immunofluorescence, siRNA	Rat	Hepatic stellate cell HSC‐T6	TP53 :+: Ferroptosis	Validated	_NA_	Cellular tumor antigen p53	P04637 (P53_HUMAN)	30321484	P53 in article
Driver	ABCC1	ATP binding cassette subfamily C member 1	HGNC:51	Accelerates ferroptosis. Disruption of MRP1 inhibited ferroptosis potently.	Western blot, GSH assay, dead cell counts, gene transfection, CRISPR/Cas9, cell viability assay, RT-qPCR	Human	HAP1, H1299, U-2 OS cells	ABCC1 :-: GSH, GSH :-: Ferroptosis	Validated	_NA_	Multidrug resistance-associated protein 1	P33527 (MRP1_HUMAN)	30726737	MRP1 in article
Driver	ACSL4	Acyl-CoA synthetase long chain family member 4	HGNC:3571	Inhibition suppresses ferroptosis.	siRNA, western blot, microscopy imaging, fluorescence microscopy, real-time PCR	Human, mice	Male C57BL/6 mice, Caco-2 cells	ACSL4 :+: Lipid ROS, Lipid ROS :+: Ferroptosis	Validated	_NA_	Long-chain-fatty-acid--CoA ligase 4	O60488 (ACSL4_HUMAN)	30737476	_NA_
Driver	MIR6852	microRNA 6852	HGNC:49993	Promotes ferroptosis. Binds to LINC0033 and serves as a negative upstream regulator of CBS-mediated ferroptosis inhibition.	qRT-PCR, gene knockdown, luciferase assay, gene overexpression, MTT assay, colony-formation assay	Human	A549 and SPC-A-1 cells	MIR6852 :-: CBS, CBS :-: Ferroptosis	Validated	_NA_	_NA_	_NA_	30787392	_NA_
Driver	ACVR1B	Activin A receptor type 1B	HGNC:172	Inhibition attenuated erastin-induced ferroptosis.	Western blot, siRNA, glutathione assay, RT-PCR, cell viability assay	Human	HK-2 cells	ACVR1B :-: NFE2L2, NFE2L2 :-: Ferroptosis	Validated	_NA_	Activin receptor type-1B	P36896 (ACV1B_HUMAN)	30804470	ALK4 in article
Driver	TGFBR1	Transforming growth factor beta receptor 1	HGNC:11772	Inhibition attenuated erastin-induced ferroptosis.	Western blot, siRNA, glutathione assay, RT-PCR, cell viability assay	Human	HK-2 cells	TGFBR1 :-: NFE2L2, NFE2L2 :-: Ferroptosis	Validated	_NA_	TGF-beta receptor type-1	P36897 (TGFR1_HUMAN)	30804470	ALK5 in article
Driver	BAP1	BRCA1 associated protein 1	HGNC:950	Promotes ferroptosis induced by class I ferroptosis inducer.	Immunoprecipitation, western blotting, cell death, cell viability, RT-PCR	Human	HEK293T cells	BAP1 :-: SLC7A11, SLC7A11 :-: Ferroptosis	Validated	_NA_	Ubiquitin carboxyl-terminal hydrolase BAP1	Q92560 (BAP1_HUMAN)	30907299	_NA_
Driver	EPAS1	Endothelial PAS domain protein 1	HGNC:3374	A driver of ferroptosis susceptibility. Ablation reduced susceptibility to ferroptosis.	CRISPR, sgRNA, shRNA, immunoblot, cell viability, western blot	Mice	786-O cells	EPAS1 :+: HILPDA, EPAS1 :+: PLIN2, HILPDA :+: PUFA, PLIN2 :+: PUFA, PUFA :+: PUFA-phospholipid hydroperoxides, PUFA-phospholipid hydroperoxides :+: Ferroptosis	Validated	_NA_	Endothelial PAS domain-containing protein 1	Q99814 (EPAS1_HUMAN)	30962421	HIF-2alpha in article
Driver	HILPDA	Hypoxia inducible lipid droplet associated	HGNC:28859	Promotes ferroptosis sensitivity downstream of HIF-2alpha.	RNA-Seq, western blot, qRT-PCR, shRNA, cell viability, immunoblot	Mice	786-O cells	HILPDA :+: PUFA, PUFA :+: PUFA-phospholipid hydroperoxides, PUFA-phospholipid hydroperoxides :+: Ferroptosis	Validated	_NA_	Hypoxia-inducible lipid droplet-associated protein	Q9Y5L2 (HLPDA_HUMAN)	30962421	_NA_
Driver	HIF1A	Hypoxia inducible factor 1 subunit alpha	HGNC:4910	Re-sensitized HIF-2alpha-null cells to ferroptosis. Induce ferroptosis sensitivity in cancer cells.	cDNA screenin, cell viability	Mice	786-O cells	HIF1A :+: HILPDA, HIF1A :+: PLIN2, HILPDA :+: PUFA, PLIN2 :+: PUFA, PUFA :+: PUFA-phospholipid hydroperoxides, PUFA-phospholipid hydroperoxides :+: Ferroptosis	Validated	_NA_	Hypoxia-inducible factor 1-alpha	Q16665 (HIF1A_HUMAN)	30962421	HIF-1alpha in article
Driver	ALOX12	Arachidonate 12-lipoxygenase, 12S type	HGNC:429	An essential factor of p53-dependent ferroptosis. Loss of one Alox12 allele is sufficient to abrogate p53-mediated ferroptosis.	RNAi, qRT-PCR, western blot, CRISPR, cell death assay, GSH measurement, flow cytometer	Human, mice	H1299 cells, U2OS cells, mouse embryonic fibroblasts, mice	ALOX12 :+: PUFAs-OOH, PUFAs-OOH :+: Ferroptosis	Validated	_NA_	Arachidonate 12-lipoxygenase	P18054 (LOX12_HUMAN)	30962574	_NA_
Driver	ACSL4	Acyl-CoA synthetase long chain family member 4	HGNC:3571	Required for ferroptosis induced by erastin. ACSL4-null cells are resistant to ferroptosis induced by either erastin.	Western blot, cell death assay, CRISPR	Human	U2OS	ACSL4 :+: Ferroptosis	Validated	_NA_	Long-chain-fatty-acid--CoA ligase 4	O60488 (ACSL4_HUMAN)	30962574	_NA_
Driver	HMOX1	Heme oxygenase 1	HGNC:5013	Enhances the ferroptotic process in PRDX6-silenced cells by promoting cellular accumulation of ferrous ions. Overexpression increases both erastin and RSL-3-induced lipid ROS.	Gene transfection, western blot, qRT-PCR, LOOH quantification	Human	H1299 cells	HMOX1 :+: Ferroptosis	Validated	_NA_	Heme oxygenase 1	P09601 (HMOX1_HUMAN)	31036877	_NA_
Driver	IFNG	Interferon gamma	HGNC:5438	Interferon gamma released from CD8+ T cells downregulates the expression of SLC3A2 and SLC7A11, and as a consequence, promotes tumour cell lipid peroxidation and ferroptosis.	BODIPY-C11, liperfluo staining, cell death measurement, FACS, cell proliferation and viability assay, qPCR, immunoblotting, glutathione quantification, MDA assay, glutamate assay	Human, mice	HT-1080, A375, B16-F0, ID8 cells, female NSG and C57BL/6 mice	IFNG :-: SLC3A2, IFNG :-: SLC7A11, SLC3A2 :+: System Xc-, SLC7A11 :+: System Xc-, System Xc- :+: Cystine, Cystine :-: Lipid ROS, Lipid ROS :+: Ferroptosis	Validated	_NA_	Interferon gamma	P01579 (IFNG_HUMAN)	31043744	IFNgamma in article
Driver	ANO6	Anoctamin 6	HGNC:25240	Essential for ferroptosis. Inhibition blocked ferroptotic cell death induced by RSL3/erastin.	Immunocytochemistry, RT-PCR, TUNEL Assay, flow Cytometry, LDH assay, gene knockout, siRNA	Human, mice	A549, Cal27, HT29 and MG-63 cells, Cx3cr1-Cre mice	ANO6 :+: Ferroptosis	Validated	_NA_	Anoctamin-6	Q4KMQ2 (ANO6_HUMAN)	31060306	_NA_
Driver	LPIN1	Lipin 1	HGNC:13345	Overexpression of adipose lipin‐1 in mice facilitated the onset of hepatic ferroptosis.	Enzyme‐linked immunosorbent assay, lipid peroxidation assay, iron assay, MDA assay, qPCR, GSH assay	Mice	C57BL/6 mice	LPIN1 :+: Ferroptosis	Validated	_NA_	Phosphatidate phosphatase LPIN1	Q14693 (LPIN1_HUMAN)	31061954	_NA_
Driver	HMGB1	High mobility group box 1	HGNC:4983	Required for erastin-induced ferroptosis. Knockdown of HMGB1 decreased erastin-induced cell death.	Gene transfection, RNAi, cell viability assay, ELISA, LDH assay, flow cytometry, qPCR, western blot, electron microscopy	Human, mice	HL-60 cell, male NOD/SCID mice	HMGB1 :+: Ferroptosis	Validated	_NA_	High mobility group protein B1	P09429 (HMGB1_HUMAN)	31105999	_NA_
Driver	TNFAIP3	TNF alpha induced protein 3	HGNC:11896	Overexpression increased ROS generation and enhanced erastin-induced ferroptosis, whereas knockdown inhibited erastin-induced ferroptosis.	Lentivirus transduction, CCK-8 assay, DYE670 staining assay, ROS staining assay, RT-qPCR, western blot	Human	HUVEC cells	TNFAIP3 :+: ACSL4, ACSL4 :+: Lipid ROS, TNFAIP3 :-: GPX4, GPX4 :-: Lipid ROS, Lipid ROS :+: Ferroptosis	Validated	_NA_	Tumor necrosis factor alpha-induced protein 3	P21580 (TNAP3_HUMAN)	31160087	Zinc lipoprotein A20 in article
Driver	TLR4	Toll like receptor 4	HGNC:11850	Knockdown inhibited ferroptosis.	Immunohistochemistry, western blot, cell death assay, siRNA	Rat	Sprague Dawley rats	TLR4 :+: Ferroptosis	Validated	_NA_	Toll-like receptor 4	O00206 (TLR4_HUMAN)	31196626	_NA_
Driver	NOX4	NADPH oxidase 4	HGNC:7891	Knockdown inhibited ferroptosis.	Immunohistochemistry, western blot, cell death assay, siRNA	Rat	Sprague Dawley rats	NOX4 :+: Ferroptosis	Validated	_NA_	NADPH oxidase 4	Q9NPH5 (NOX4_HUMAN)	31196626	_NA_
Driver	ATF3	Activating transcription factor 3	HGNC:785	Promotes ferroptosis induced by erastin.	Cell viability assay, transfection, lentiviral infection, qRT-PCR, western blot	Human	HT1080 cells, retinal pigment epithelial cells	ATF3 :-: SLC7A11, SLC7A11 :+: System Xc-, System Xc- :+: GSH, GSH :-: Lipid ROS, Lipid ROS :+: Ferroptosis	Validated	_NA_	Cyclic AMP-dependent transcription factor ATF-3	P18847 (ATF3_HUMAN)	31273299	_NA_
Driver	ATM	ATM serine/threonine kinase	HGNC:795	Essential for ferroptosis. Genetic knockdown and chemical inhibition of ATM both suppress ferroptotic cell death.	siRNA, western blot, nuclear/cytosol fraction, cell viability, cell death, GSH assay, kinome screen, qRT-PCR, immunofluorescence assay	Human	MDA-MB-231, RCC4, 293T, and HT-1080 cell lines	ATM :-: MTF1, MTF1 :+: FTL, MTF1 :+: FTH1, FTL :-: Ferroptosis, FTH1 :-: Ferroptosis	Validated	_NA_	Serine-protein kinase ATM	Q13315 (ATM_HUMAN)	31320750	_NA_
Driver	YY1AP1	YY1 associated protein 1	HGNC:30935	Makes cells more sensitive to ferroptosis. Cells lacking YAP were no longer sensitised to ferroptosis.	Cell death, cell viability, lipid peroxidation, immunoblotting, CRISPR/Cas9, ChIP assay, qRT-PCR	Human, mice	Mouse embryonic fibroblasts, NF639 cells, human epithelial tumour cells, human mesothelioma cells, xenograft mouse	YAP :+: ACSL4, ACSL4 :+: Ferroptosis, YAP :+: TFRC, TFRC :+: Ferroptosis	Validated	_NA_	YY1-associated protein 1	Q9H869 (YYAP1_HUMAN)	31341276	YAP in article
Driver	EGLN2	Egl-9 family hypoxia inducible factor 2	HGNC:14660	Inhibiting EGLN2 activation diminished ferroptotic tumor cell death.	Cytotoxicity assays, western blot, immunoprecipitation, RNA interference, gene transfection, qPCR, MDA assay	Human, mice	Calu-1, THP1, HT1080, and HL-60 cells, athymic nude mice	EGLN2 :-: HIF1A, HIF1A :-: Lipid ROS, Lipid ROS :+: Ferroptosis	Validated	_NA_	Egl nine homolog 2	Q96KS0 (EGLN2_HUMAN)	31355331	_NA_
Driver	MIOX	Myo-inositol oxygenase	HGNC:14522	Overexpression exacerbates cell death, knockdown inhibits ferroptosis.	MTT assay, measurement of GPX4 activity, labile iron pool assay, evaluation of cell death and cell morphology, immunohistochemical staining	Human, mice	HK-2 cells, C57BL/6J mice	MIOX :-: GPX4, GPX4 :-: Ferroptosis, MIOX :-: GSH, GSH :-: Ferroptosis	Validated	_NA_	Inositol oxygenase	Q9UGB7 (MIOX_HUMAN)	31437128	_NA_
Driver	TAZ	Tafazzin	HGNC:11577	TAZ removal confers ferroptosis resistance, whereas overexpression of TAZS89A sensitizes cells to ferroptosis.	Cell viability, cell death, western blot, siRNA, qRT-PCR, microarray, immunofluorescence staining, ChIP-seq, Lipid ROS assay	Human, mice	RCC4, 786O cells, JAX NOD.CB17-PrkdcSCID-J mice	TAZ :+: EMP1, EMP1 :+: NOX4, NOX4 :+: Lipid ROS, Lipid ROS :+: Ferroptosis	Validated	_NA_	Tafazzin	Q16635 (TAZ_HUMAN)	31484063	_NA_
Driver	MTDH	Metadherin	HGNC:29608	Can enhance sensitivity to inducers of ferroptosis. Enhances the vulnerability of cancer cells to ferroptosis.	Cell viability, qRT-PCR, western blotting, GSH assay, GPx4 activity assay, tumor xenograft model	Human, mice	Cell lines A549, H1975, DMS53, DMS273, KLE, AN3CA, RL95, Hec1A, Ishikawa, MDA-MB-231, MCF-7, Hec50, immunodeficient mice	MTDH :-: Cysteine, Cystein :-: Ferroptosis, MTDH :-: SLC3A2, SLC3A2 :-: Ferroptosis, MTDH :-: GPX4, GPX4 :-: Ferroptosis, MTDH :-: GSH, GSH :-: Ferroptosis, MTDH :+: Glutamate, Glutamate :+: Ferroptosis	Validated	_NA_	Protein LYRIC	Q86UE4 (LYRIC_HUMAN)	31527591	_NA_
Driver	IDH1	Isocitrate dehydrogenase (NADP(+)) 1	HGNC:5382	Deletion of the mutant IDH1 allele or pharmacological inhibition of mutant IDH1 confers resistance to erastin-induced ferroptosis. Ectopic expression of mutant IDH1 promotes ferroptosis.	Cell transfection, cell viability, GSH assay, lipid ROS assay	Human	HEK293T, HT-1080 and KYSE-170 cells	IDH1 :-: GPX4, GPX4 :-: Lipid ROS, Lipid ROS :+: Ferroptosis, IDH1 :-: GSH, GSH :-: Ferroptosis	Validated	_NA_	Isocitrate dehydrogenase [NADP] cytoplasmic	O75874 (IDHC_HUMAN)	31591388	_NA_
Driver	SIRT1	Sirtuin 1	HGNC:14929	Knockout partially mitigates ferroptosis.	Lipid peroxidation, iron and GSH assay, qRT-PCR, western blot	Mice	Mice in C57BL/6 background	SIRT1 :+: Ferroptosis	Predicted	_NA_	NAD-dependent protein deacetylase sirtuin-1	Q96EB6 (SIR1_HUMAN)	31610175	_NA_
Driver	TAZ	Tafazzin	HGNC:11577	TAZ removal confers ferroptosis resistance, while TAZS89A overexpression sensitizes cells to ferroptosis.	siRNA, qRT-PCR, western blot, cell viability, lipid ROS assay	Human	TOV-21G, CAOV2, CAOV2R, MDA-MB-231 cells	TAZ :+: ANGPTL4, ANGPTL4 :+: NOX2, NOX2 :+: Ferroptosis	Validated	_NA_	Tafazzin	Q16635 (TAZ_HUMAN)	31641008	_NA_
Driver	BECN1	Beclin 1	HGNC:1034	Overexpression aggravated isoflurane-induced cell damage by upregulating ferroptosis. This phenomenon was significantly attenuated by silencing of Beclin1.	Cell viability, RNAi, RT-qPCR, western blot, lipid peroxidation, iron, GSH and glutamate release assays	Human	SH-SY5Y cells	(Beclin1/SLC7A11) :-: System Xc-, System Xc- :-: Ferroptosis	Validated	_NA_	Beclin-1	Q14457 (BECN1_HUMAN)	31650158	Beclin1 in article
Driver	FBXW7	F-box and WD repeat domain containing 7	HGNC:16712	FBXW7 plasmid induces ferroptosis.	Cell viability, lipid peroxidation, iron, GSH and ROS assays, western blot, RT-PCR, RNA-seq	Human, mice	Hepatic stellate cells, C57BL/6 mice	FBXW7 :+: Ferroptosis	Deduced	_NA_	F-box/WD repeat-containing protein 7	Q969H0 (FBXW7_HUMAN)	31679460	_NA_
Driver	PANX1	Pannexin 1	HGNC:8599	Deletion protects against ferroptotic cell death. Silenced Panx1 expression significantly attenuated ferroptotic lipid peroxidation and iron accumulation induced by the ferroptosis inducer erastin.	Cell viability, cell death, qRT-PCR, western blot, lipid peroxidation detection, shRNA	Human, mice	HK-2 cells, C57BL/6 mice	PANX1 :-: HMOX1, HMOX1 :-: Ferroptosis, PANX1 :+: MAPK/ERK, MAPK/ERK :+: Ferroptinophagy, Ferroptinophagy :+: Ferroptosis	Validated	_NA_	Pannexin-1	Q96RD7 (PANX1_HUMAN)	31694915	_NA_
Driver	DNAJB6	DnaJ heat shock protein family (Hsp40) member B6	HGNC:14888	Promotes ferroptosis in esophageal squamous cell carcinoma.	Western blot, immunohistochemistry,lentivirus infection, colony-forming, RT‑qPCR, CCK-8, transwell and mouse xenograft assays	Human, mice	Cell lines TE-1, Eca9706, Eca109, KYSE150, and KYSE450, BALB/c athymic nude mice	DNAJB6 :-: GPX4, GPX4 :-: Ferroptosis	Predicted	_NA_	DnaJ homolog subfamily B member 6	O75190 (DNJB6_HUMAN)	31701262	_NA_
Driver	BACH1	BTB domain and CNC homolog 1	HGNC:935	Promotes ferroptosis by repressing the transcription of a subset of the erastin-induced protective genes.	Western blotting, qPCR, cell death, labile iron detection, RNA-seq	Mice	C57BL/6J mice, mouse embryonic fibroblasts	BACH1 :+: Lipid ROS, Lipid ROS :+: Ferroptosis	Validated	_NA_	Transcription regulator protein BACH1	O14867 (BACH1_HUMAN)	31740582	_NA_
Driver	ACSL4	Acyl-CoA synthetase long chain family member 4	HGNC:3571	Overexpression induced ferroptosis. The opposite results were observed when ACSL4 was silenced.	Western blotting, immunofluorescence, 5‑HETE, LDH and CCK-8 cell viability assay	Human	HEB, T98G, U87 MG and U251 cells	ACSL4 :-: GPX4, GPX4 :-: Ferroptosis	Validated	_NA_	Long-chain-fatty-acid--CoA ligase 4	O60488 (ACSL4_HUMAN)	31789401	_NA_
Driver	LONP1	Lon peptidase 1, mitochondrial	HGNC:9479	Inhibition of LONP1 negatively regulates erastin-induced cell death.	Cell viability, western blot, qRT-PCR, lipid peroxidation assay, glutathione assay	Human	PANC1, BxPC3 cells	LONP1 :-: Nrf2/Keap1 pathway, Nrf2/Keap1 pathway :-: Ferroptosis, LONP1 :-: GPX4, GPX4 :-: Ferroptosis	Validated	_NA_	Lon protease homolog, mitochondrial	P36776 (LONM_HUMAN)	31822343	_NA_
Suppressor	SLC7A11	Solute carrier family 7 member 11	HGNC:11059	Silencing of SLC7A11 sensitized HT-1080 cells to erastin-induced death, whereas transfection of HT-1080 cells with a plasmid encoding SLC7A11 conferred protection from erastin- and sulfasalazine-induced death.	RT-qPCR, siRNA, gene transfection, cell viability	Human	HT-1080 cells	SLC7A11 :+: Cystine, Cystine :-: Ferroptosis	Validated	_NA_	Cystine/glutamate transporter	Q9UPY5 (XCT_HUMAN)	22632970	_NA_
Suppressor	GPX4	Glutathione peroxidase 4	HGNC:4556	RNAi-mediated GPX4 knockdown induces ferroptosis.	Affinity-based chemoproteomics, western blotting, and RNAi	Human, mice	HRAS mutant BJeLR-engineered tumor cells, HT-1080 cells, xenograft mouse model (athymic nude mice injected with four million HT-1080 cells)	GPX4 :-: Lipid ROS, Lipid ROS :+: Ferroptosis	Validated	_NA_	Phospholipid hydroperoxide glutathione peroxidase	P36969 (GPX4_HUMAN)	24439385	_NA_
Suppressor	AKR1C1	Aldo-keto reductase family 1 member C1	HGNC:384	Up-regulated in DU-145 erastin-resistant clones. Participate in the detoxification of toxic lipid metabolites. May confer partial resistance to erastin by enhancing the detoxification of reactive aldehydes generated downstream of the oxidative destruction of the plasma membrane during ferroptosis.	RNA-seq, glutamate release assay, cell growth, flow cytometry	Human	DU-145 prostate cancer cells	AKR1C1 :-: Ferroptosis	Validated	_NA_	Aldo-keto reductase family 1 member C1	Q04828 (AK1C1_HUMAN)	24844246	_NA_
Suppressor	AKR1C2	Aldo-keto reductase family 1 member C2	HGNC:385	Up-regulated in DU-145 erastin-resistant clones. Participate in the detoxification of toxic lipid metabolites. May confer partial resistance to erastin by enhancing the detoxification of reactive aldehydes generated downstream of the oxidative destruction of the plasma membrane during ferroptosis.	RNA-seq, glutamate release assay, cell growth, flow cytometry	Human	DU-145 prostate cancer cells	AKR1C2 :-: Ferroptosis	Validated	_NA_	Aldo-keto reductase family 1 member C2	P52895 (AK1C2_HUMAN)	24844246	_NA_
Suppressor	AKR1C3	Aldo-keto reductase family 1 member C3	HGNC:386	Up-regulated in DU-145 erastin-resistant clones. Participate in the detoxification of toxic lipid metabolites. May confer partial resistance to erastin by enhancing the detoxification of reactive aldehydes generated downstream of the oxidative destruction of the plasma membrane during ferroptosis.	RNA-seq, glutamate release assay, cell growth, flow cytometry	Human	DU-145 prostate cancer cells	AKR1C3 :-: Ferroptosis	Validated	_NA_	Aldo-keto reductase family 1 member C3	P42330 (AK1C3_HUMAN)	24844246	_NA_
Suppressor	GPX4	Glutathione peroxidase 4	HGNC:4556	Knockout of glutathione peroxidase 4 (Gpx4) causes cell death in a pathologically relevant form of ferroptosis. Knockdown renders cells more sensitive to ferroptosis-inducing agents.	Cell viability assessment, siRNA	Human, mice	Mouse embryonic fibroblast (MEF) cells (Pfa1 cells), Gpx4−/− cells and mice, HK-2 cells	GPX4 :-: Lipid ROS, Lipid ROS :+: Ferroptosis	Validated	_NA_	Phospholipid hydroperoxide glutathione peroxidase	P36969 (GPX4_HUMAN)	25402683	_NA_
Suppressor	RB1	RB transcriptional corepressor 1	HGNC:9884	Rb knock-down cells exposed to sorafenib encounter ferroptosis. Lack of Rb sensitized HCC cells to the induction of ferroptosis.	RNA interference, cell viability assay, oxidative stress measurement	Human, mice	HCC cell lines Huh7 and PLC/PRF5; Balb/c nude mice received tumour xenografts derived from HCC cells.	RB1 :-: Ferroptosis	Validated	_NA_	Retinoblastoma-associated protein	P06400 (RB_HUMAN)	25444922	_NA_
Suppressor	HSPB1	Heat shock protein family B (small) member 1	HGNC:5246	Knockdown of HSF1 and HSPB1 enhances erastin-induced ferroptosis, whereas heat shock pretreatment and overexpression of HSPB1 inhibits erastin-induced ferroptosis.	RNAi, RT-qPCR, western blot, cell viability	Human, mice	HeLa and U2OS cells, human xenograft mouse tumor derived from HeLa (#CCL-2) cells.	HSPB1 :-: Ferroptosis	Validated	_NA_	Heat shock protein beta-1	P04792 (HSPB1_HUMAN)	25728673	_NA_
Suppressor	HSF1	Heat shock transcription factor 1	HGNC:5224	Knockdown of HSF1 and HSPB1 enhances erastin-induced ferroptosis, whereas heat shock pretreatment and overexpression of HSPB1 inhibits erastin-induced ferroptosis.	RNAi, RT-qPCR, western blot, cell viability	Human, mice	HeLa and U2OS cells, human xenograft mouse tumor derived from HeLa (#CCL-2) cells.	HSF1 :-: Ferroptosis	Validated	_NA_	Heat shock factor protein 1	Q00613 (HSF1_HUMAN)	25728673	_NA_
Suppressor	SLC7A11	Solute carrier family 7 member 11	HGNC:11059	Overexpressed in human cancer specimens. Overexpression inhibits ROS-induced ferroptosis.	Western blot, cell death test, ChIP assay, RT-PCR, immunofluorescence staining, colony formation assay, TUNEL and BrdU assay	Human, mice	H1299 cells, mouse embryonic fibroblasts, transgenic mice; colon, liver and kidney tumour samples; mouse xenograft	SLC7A11 :+: Cystine, Cystine :-: Ferroptosis	Validated	_NA_	Cystine/glutamate transporter	Q9UPY5 (XCT_HUMAN)	25799988	_NA_
Suppressor	GPX4	Glutathione peroxidase 4	HGNC:4556	Ex vivo, Gpx4-deficient T cells rapidly accumulated membrane lipid peroxides and concomitantly underwent cell death driven by ferroptosis.	Viability assays, flow cytometry, lipid peroxidation assay	Mice	T cells	GPX4 :-: Ferroptosis	Validated	_NA_	Phospholipid hydroperoxide glutathione peroxidase	P36969 (GPX4_HUMAN)	25824823	_NA_
Suppressor	GCLC	Glutamate-cysteine ligase catalytic subunit	HGNC:4311	RNAi knockdown sensitized cell death induced by cystine starvation.	RNAi, qPCR	Mice	Mouse embryonic fibroblasts	GCLC :+: GSH, GSH :-: Ferroptosis	Validated	_NA_	Glutamate--cysteine ligase catalytic subunit	P48506 (GSH1_HUMAN)	26166707	_NA_
Suppressor	SLC7A11	Solute carrier family 7 member 11	HGNC:11059	Overexpression of SLC7A11 considerably abrogated ferroptosis.	Cell death quantification, gene transfection, western blot	Human	H1299 cells	SLC7A11 :-: Ferroptosis	Validated	_NA_	Cystine/glutamate transporter	Q9UPY5 (XCT_HUMAN)	26218928	_NA_
Suppressor	NFE2L2	Nuclear factor, erythroid 2 like 2	HGNC:7782	NRF2 plays a central role in protecting hepatocellular carcinoma (HCC) cells against ferroptosis	Cell Viability Analysis, western blot, RNAi, qRT-PCR	Human, mice	HepG2, Hepa1‐6, Hep3B, and SNU‐182 cells, C57BL/6 mice	NFE2L2 :+: (NQO1/HMOX1/FTH1), (NQO1/HMOX1/FTH1) :-: Ferroptosis	Validated	_NA_	Nuclear factor erythroid 2-related factor 2	Q16236 (NF2L2_HUMAN)	26403645	NRF2 in article
Suppressor	SQSTM1	Sequestosome 1	HGNC:11280	The interaction between p62 and Keap1 increased following erastin and sorafenib treatment. Knockdown of p62 suppressed NRF2 expression and promoted growth inhibition with increased ferroptotic events including GSH depletion, lipid ROS production, and an increase of iron levels.	Immunoprecipitation assay, shRNA knockdown, iron assay, lipid peroxidation assay, glutathione assay, cell viability	Human, mice	HepG2, Hepa1‐6, Hep3B, and SNU‐182 cells	SQSTM1 :-: KEAP1, KEAP1 :-: NFE2L2, NFE2L2 :-: Ferroptosis	Validated	_NA_	Sequestosome-1	Q13501 (SQSTM_HUMAN)	26403645	p62 in article.
Suppressor	NQO1	NAD(P)H quinone dehydrogenase 1	HGNC:2874	Knockdown of p62, quinone oxidoreductase‐1, heme oxygenase‐1, and ferritin heavy chain‐1 by RNA interference in HCC cells promoted ferroptosis in response to erastin and sorafenib.	qRT‐PCR, RNA interference	Human, mice	HepG2, Hepa1‐6, Hep3B, and SNU‐182 cells	NQO1 :-: Ferroptosis	Validated	_NA_	NAD(P)H dehydrogenase [quinone] 1	P15559 (NQO1_HUMAN)	26403645	_NA_
Suppressor	HMOX1	Heme oxygenase 1	HGNC:5013	Knockdown of p62, quinone oxidoreductase‐1, heme oxygenase‐1, and ferritin heavy chain‐1 by RNA interference in HCC cells promoted ferroptosis in response to erastin and sorafenib.	qRT‐PCR, RNA interference	Human, mice	HepG2, Hepa1‐6, Hep3B, and SNU‐182 cells	HMOX1 :-: Ferroptosis	Validated	Article (PMID 26405158) suggests it a driver.	Heme oxygenase 1	P09601 (HMOX1_HUMAN)	26403645	HO1 in article
Suppressor	FTH1	Ferritin heavy chain 1	HGNC:3976	Knockdown of p62, quinone oxidoreductase‐1, heme oxygenase‐1, and ferritin heavy chain‐1 by RNA interference in HCC cells promoted ferroptosis in response to erastin and sorafenib.	qRT‐PCR, RNA interference	Human, mice	HepG2, Hepa1‐6, Hep3B, and SNU‐182 cells	FTH1 :-: Ferroptosis	Validated	_NA_	Ferritin heavy chain	P02794 (FRIH_HUMAN)	26403645	_NA_
Suppressor	MUC1	Mucin 1, cell surface associated	HGNC:7508	MUC1-C (C-terminal subunit) blocks erastin-induced ferroptosis and induces increases in GSH.	shRNA, GSH level measurement, cell death test	Human	MDA-MB-468, BT-20 cells	MUC1 :+: System Xc-, System Xc- :+: GSH, GSH :-: Ferroptosis	Validated	_NA_	Mucin-1	P15941 (MUC1_HUMAN)	26930718	_NA_
Suppressor	SLC3A2	Solute carrier family 3 member 2	HGNC:11026	Required for in vitro cell survival because of its role in protecting cells from ferroptosis.	Cell survival test	Mice	Mouse ES-derived fibroblasts	SLC3A2 :+: System Xc-, System Xc- :-: Ferroptosis	Validated	_NA_	4F2 cell-surface antigen heavy chain	P08195 (4F2_HUMAN)	26945935	CD98hc in article
Suppressor	MT1G	Metallothionein 1G	HGNC:7399	A negative regulator of ferroptosis in HCC cells. Knockdown of MT‐1G by RNA interference increases glutathione depletion and lipid peroxidation, which contributes to sorafenib‐induced ferroptosis.	RNA interference, cell viability assay, colony formation assay, western blot, qRT-PCR, glutathione assay, lipid peroxidation assay	Human, mice	HCC cells (HepaG2, Hep3B, and Huh7 cells), nude mice.	MT1G :-: Ferroptosis	Validated	_NA_	Metallothionein-1G	P13640 (MT1G_HUMAN)	27015352	MT‐1G in article
Suppressor	NFE2L2	Nuclear factor, erythroid 2 like 2	HGNC:7782	Required for sorafenib‐induced expression of MT‐1G which is a ferroptosis suppressor.	shRNA, qRT-PCR, western blot	Human	Huh7 and/or HepG2 cells	NFE2L2 :+: MT1G, MT1G :-: Ferroptosis	Deduced	Its ability to induce MT1G was validated, but its role in ferroptosis needs validation.	Nuclear factor erythroid 2-related factor 2	Q16236 (NF2L2_HUMAN)	27015352	NRF2 in article
Suppressor	SLC40A1	Solute carrier family 40 member 1	HGNC:10909	Involved in siramesine and lapatinib-induced ferroptotic cell death. Its expression is decreased after treatment with siramesine alone or in combination with lapatinib. Overexpression FPN resulted in decreased ROS and cell death whereas knockdown of FPN increased cell death after siramesine and lapatinib treatment.	Western blot, densitometry quantification, siRNA, gene transfection, cell death test	Human	MDA MB 231 and SKBr3 cells	SLC40A1 :-: Lipid ROS, Lipid ROS :+: Ferroptosis	Validated	_NA_	Solute carrier family 40 member 1	Q9NP59 (S40A1_HUMAN)	27441659	Ferroportin-1 (FPN) in article
Suppressor	SLC7A11	Solute carrier family 7 member 11	HGNC:11059	Knockdown increased cell death.	siRNA, western blot, cell death test	Human	MDA MB 231 cells	SLC7A11 :+: GSH, GSH :-: Ferroptosis	Validated	_NA_	Cystine/glutamate transporter	Q9UPY5 (XCT_HUMAN)	27441659	_NA_
Suppressor	GPX4	Glutathione peroxidase 4	HGNC:4556	Knockdown increased cell death.	siRNA, western blot, cell death test	Human	MDA MB 231 and SKBr3 cells	GPX4 :-: Ferroptosis	Validated	_NA_	Phospholipid hydroperoxide glutathione peroxidase	P36969 (GPX4_HUMAN)	27441659	_NA_
Suppressor	SLC7A11	Solute carrier family 7 member 11	HGNC:11059	Inhibition induces ferroptosis. Silencing of the SLC7A11 gene increases the cisplatin sensitivity of resistant HNC cells.	Cell viability, western blot, siRNA or shRNA, glutathione and ROS production measurements	Human, mice	AMC-HN3R, -HN4R, and -HN9R head and neck cancer cells, BALB/c male nude mice	SLC7A11 :-: Ferroptosis	Validated	_NA_	Cystine/glutamate transporter	Q9UPY5 (XCT_HUMAN)	27477897	_NA_
Suppressor	CISD1	CDGSH iron sulfur domain 1	HGNC:30880	Genetic inhibition of CISD1 contributes to erastin-induced ferroptosis. Stabilization of the iron sulfur cluster of CISD1 inhibits ferroptosis.	Cytotoxicity assays, western blot, q-PCR, RNAi	Human	HepG2 and Hep3B cells	CISD1 :-: Mitochondrial lipid ROS, Mitochondrial lipid ROS :+: Ferroptosis	Validated	_NA_	CDGSH iron-sulfur domain-containing protein 1	Q9NZ45 (CISD1_HUMAN)	27510639	_NA_
Suppressor	SLC7A11	Solute carrier family 7 member 11	HGNC:11059	Elevated levels of expression are resistant to erastin-induced ferroptosis. Repression of SLC7A11 expression by p53 sensitized cells to undergo erastin-induced ferroptosis.	Western blot, cell death assay, qPCR	Human	H1299 cells	SLC7A11 :-: Ferroptosis	Validated	_NA_	Cystine/glutamate transporter	Q9UPY5 (XCT_HUMAN)	27705786	_NA_
Suppressor	FANCD2	FA complementation group D2	HGNC:3585	Inhibits erastin-induced ferroptosis. Plays a novel role in the negative regulation of ferroptosis.	Cell viability assay, Q-PCR, western blot, iron assay, lipid peroxidation assay, glutathione assay	Mice	Bone marrow stromal cells	FANCD2 :-: Ferroptosis	Validated	_NA_	Fanconi anemia group D2 protein	Q9BXW9 (FACD2_HUMAN)	27773819	_NA_
Suppressor	GPX4	Glutathione peroxidase 4	HGNC:4556	Protects lipid peroxidation. Cell damage induced by GPx4 ablation is involved in ferroptosis.	RT-PCR, western blot, cytotoxicity assay, cell proliferation assay, siRNA	Human	Umbilical vein endothelial cell	GPX4 :-: LDH, LDH :+: Ferroptosis	Validated	_NA_	Phospholipid hydroperoxide glutathione peroxidase	P36969 (GPX4_HUMAN)	27964880	_NA_
Suppressor	NFE2L2	Nuclear factor, erythroid 2 like 2	HGNC:7782	Nrf2 activation contributes to the resistance of HNCs to artesunate-induced ferroptosis. Nrf2 inhibition sensitizes head and neck cancer cells to artesunate-induced ferroptosis.	Cell viability assay, RNAi, gene transfection, western blot	Mice	Head and neck cancer cells (HN2–10), nude mice	NFE2L2 :-: Ferroptosis	Validated	_NA_	Nuclear factor erythroid 2-related factor 2	Q16236 (NF2L2_HUMAN)	28012440	NRF2 in article
Suppressor	FTMT	Ferritin mitochondrial	HGNC:17345	Overexpression significantly inhibited erastin-induced ferroptosis.	Cell viability assay, western blot	Mice, fly	SH-SY5Y cells, drosophila melanogasters W1118, elav-Gal4 and UAS-Fer3HCH	FTMT :-: Labile iron pool, Labile iron pool :+: Ferroptosis	Validated	_NA_	Ferritin	Q8N4E7 (FTMT_HUMAN)	28066232	_NA_
Suppressor	HSPA5	Heat shock protein family A (Hsp70) member 5	HGNC:5238	Negatively regulates ferroptosis. Suppression of HSPA5 expression increased erastin-induced death. Overexpressed HSPA5 inhibited erastin-induced ferroptotic cell death.	Cell viability assay, western blot, shRNA, gene transfection	Human, mice	Pancreatic ductal adenocarcinoma cell lines (PANC1, CFPAC1, MiaPaCa2), nude mice, B6 mice	HSPA5 :+: GPX4, GPX4 :-: Lipid ROS, Lipid ROS :+: Ferroptosis	Validated	_NA_	Endoplasmic reticulum chaperone BiP	P11021 (BIP_HUMAN)	28130223	_NA_
Suppressor	ATF4	Activating transcription factor 4	HGNC:786	Inhibition of ATF4 expression increased erastin-induced cell death. ATF4 results in the induction of HSPA5, which in turn protects against GPX4 protein degradation and subsequent ferroptosis.	CCK8 cell viability assay, clonogenic cell survival assay, western blot, q-PCR, RNAi	Human	Pancreatic ductal adenocarcinoma cells (e.g., PANC1, CFPAC1, MiaPaCa2, and Panc2.03)	ATF4 :+: HSPA5, HSPA5 :+: GPX4, GPX4 :-: Lipid ROS, Lipid ROS :+: Ferroptosis	Validated	_NA_	Cyclic AMP-dependent transcription factor ATF-4	P18848 (ATF4_HUMAN)	28130223	_NA_
Suppressor	SLC7A11	Solute carrier family 7 member 11	HGNC:11059	Slc7a11 deletion increases susceptibility to iron overload-induced ferroptosis.	Cell viability, RNAi, RT-PCR	Mice	Mice, hepatocytes, bone marrow–derived macrophages	SLC7A11 :-: Ferroptosis	Validated	_NA_	Cystine/glutamate transporter	Q9UPY5 (XCT_HUMAN)	28195347	_NA_
Suppressor	GPX4	Glutathione peroxidase 4	HGNC:4556	Ferroptosis drives neurodegeneration in Gpx4BIKO mice.	RT-qPCR, behavior test, western blot	Mice	Forebrain neurons of Gpx4BIKO mice and Gpx4(f/f) mice	GPX4 :-: Ferroptosis	Validated	_NA_	Phospholipid hydroperoxide glutathione peroxidase	P36969 (GPX4_HUMAN)	28212525	_NA_
Suppressor	GPX4	Glutathione peroxidase 4	HGNC:4556	Downregulation conferred increased sensitivity to ferroptosis following cystine deprivation.	Immunoblotting, cell viability	Human	Human mammary epithelial cells	GPX4 :-: Lipid ROS, Lipid ROS :+: Ferroptosis	Validated	_NA_	Phospholipid hydroperoxide glutathione peroxidase	P36969 (GPX4_HUMAN)	28297659	_NA_
Suppressor	HMOX1	Heme oxygenase 1	HGNC:5013	Demonsrates antiferroptotic role. HO-1 deficiency promotes erastin-induced ferroptosis.	RT-PCR, western blot, cell viability, siRNA	Mice	Renal proximal tubule cells	HMOX1 :-: Ferroptosis	Validated	Article (PMID 26405158) suggests it a driver.	Heme oxygenase 1	P09601 (HMOX1_HUMAN)	28515173	HO-1 in article
Suppressor	ATF4	Activating transcription factor 4	HGNC:786	ATF4 expression induces acquired cell death resistance. ATF4 knockdown renders cells susceptible for ferroptosis.	siRNA, cell transfection, cell viability assay, RT-PCR, immunoblotting	Human	U87 and U251 glioblastoma cells	ATF4 :+: xCT, xCT :-: Lipid ROS, Lipid ROS :+: Ferroptosis	Validated	_NA_	Cyclic AMP-dependent transcription factor ATF-4	P18848 (ATF4_HUMAN)	28553953	_NA_
Suppressor	NFE2L2	Nuclear factor, erythroid 2 like 2	HGNC:7782	Nrf2 over expression promotes resistance to ferroptosis.	Cell growth assay	Human, rat	F98, U87 glioma cells	NFE2L2 :+: xCT, xCT :-: Lipid ROS, Lipid ROS :+: Ferroptosis	Validated	_NA_	Nuclear factor erythroid 2-related factor 2	Q16236 (NF2L2_HUMAN)	28805788	Nrf2 in article
Suppressor	TP53	Tumor protein p53	HGNC:11998	Inhibits ferroptosis in human colorectal cancer (CRC) cells. Loss of TP53 restored erastin sensitivity. Inhibits cell death induction by erastin in human CRC cells.	RNAi, live-cell imaging, cell viability, qPCR, western blot	Human, mice	HCT116, athymic nude mice	TP53 :+: Nucleus DPP4, Nucleus DPP4 :+: SLC7A11, SLC7A11 :-: Ferroptosis	Validated	Promotes ferroptosis via a transcription-dependent mechanism in non-CRC cells.	Cellular tumor antigen p53	P04637 (P53_HUMAN)	28813679	_NA_
Suppressor	SLC7A11	Solute carrier family 7 member 11	HGNC:11059	Knockdown sensitized cells to erastin.	shRNA, cell viability	Human	HCT116	SLC7A11 :-: Ferroptosis	Validated	_NA_	Cystine/glutamate transporter	Q9UPY5 (XCT_HUMAN)	28813679	_NA_
Suppressor	HELLS	Helicase, lymphoid specific	HGNC:4861	LSH inhibits ferroptosis by decreasing the intracellular levels of iron and lipid ROS.	Plate-colony formation assay; measurement of total ROS, Lipid ROS, and intracellular iron	Human, mice	Lung cancer H358 and PC9 cells, SCID Mice	HELLS :+: GLUT1, HELLS :+: SCD, HELLS :+: FADS2, GLUT1 :-: Ferroptosis, SCD :-: Ferroptosis, FADS2 :-: Ferroptosis	Validated	_NA_	Lymphoid-specific helicase	Q9NRZ9 (HELLS_HUMAN)	28900510	LSH in article
Suppressor	SCD	Stearoyl-CoA desaturase	HGNC:10571	Depletion of the SCD1 and FADS2 metabolic genes induces ferroptosis.	shRNA, RT-qPCR, MTT assay, total iron detection, lipid ROS detection	Human	A549 cancer cells	SCD :-: Ferroptosis	Validated	_NA_	Acyl-CoA desaturase	O00767 (ACOD_HUMAN)	28900510	SCD1 in article
Suppressor	FADS2	Fatty acid desaturase 2	HGNC:3575	Depletion of the SCD1 and FADS2 metabolic genes induces ferroptosis.	shRNA, RT-qPCR, MTT assay, total iron detection, lipid ROS detection	Human	A549 cancer cells	FADS2 :-: Ferroptosis	Validated	_NA_	Acyl-CoA 6-desaturase	O95864 (FADS2_HUMAN)	28900510	_NA_
Suppressor	SRC	SRC proto-oncogene, non-receptor tyrosine kinase	HGNC:11283	Src-STAT3 activation renders the cell unable to undergo to ferroptosis. Src inhibition decreased cell viability significantly, and that loss of viability was rescued by ferroptosis inhibitors.	Immunoblotting, RNAi, qPCR, western blot, cell viability	Human	MCF-10A and SUM-159 cells	SRC :+: STAT3, STAT3 :-: ACSL4, ACSL4 :+: Ferroptosis	Validated	_NA_	Proto-oncogene tyrosine-protein kinase Src	P12931 (SRC_HUMAN)	28972104	_NA_
Suppressor	STAT3	Signal transducer and activator of transcription 3	HGNC:11364	Src-STAT3 activation renders the cell unable to undergo to ferroptosis.	Immunoblotting, RNAi, qPCR, western blot, cell viability	Human	MCF-10A and SUM-159 cells	STAT3 :-: ACSL4, ACSL4 :+: Ferroptosis	Validated	_NA_	Signal transducer and activator of transcription 3	P40763 (STAT3_HUMAN)	28972104	_NA_
Suppressor	NFE2L2	Nuclear factor, erythroid 2 like 2	HGNC:7782	ARF-mediated ferroptosis was largely abrogated by co-expression of NRF2.	Gene transfection, cell death quantification	Human, mice	H1299, SaoS2, U2OS cells, nude mice	NFE2L2 :+: SLC7A11, SLC7A11 :-: Ferroptosis	Validated	_NA_	Nuclear factor erythroid 2-related factor 2	Q16236 (NF2L2_HUMAN)	28985506	NRF2 in article
Suppressor	PML	Promyelocytic leukemia	HGNC:9113	PML expression turned cells highly resistant to ferroptosis.	Cell death assessment	Human	IMR90 cells	PML :-: Ferroptosis	Validated	_NA_	Protein PML	P29590 (PML_HUMAN)	29081404	_NA_
Suppressor	MTOR	Mechanistic target of rapamycin kinase	HGNC:3942	Necessary and sufficient to protect cardiomyocyte cells against ferroptotic cell death. mTOR overexpression suppressed ferroptotic cell death, whereas mTOR deletion exaggerated cell death.	Cell viability assay, ROS production assay, western blot	Mice	Cardiomyocyte cell, C57BL/6 mice	MTOR :-: Ferroptosis	Validated	_NA_	Serine/threonine-protein kinase mTOR	P42345 (MTOR_HUMAN)	29127238	_NA_
Suppressor	NFS1	NFS1 cysteine desulfurase	HGNC:15910	Suppression of NFS1 cooperates with inhibition of cysteine transport to trigger ferroptosis in vitro and slow tumour growth. Suppression of NFS1 predisposes cancer cells to ferroptosis.	RNAi, cell viability assay,flow cytometry	Human	MDA-MB-231 cells, NOD.CB17 Scid/J mice	NFS1 :-: TFRC, TFRC :+: Ferroptosis	Validated	_NA_	Cysteine desulfurase	Q9Y697 (NFS1_HUMAN)	29168506	_NA_
Suppressor	TP63	Tumor protein p63	HGNC:15979	Delta Np63 alpha can inhibit ferroptosis independent of p53. Overexpression protects cells from ferroptosis-inducing agents.	siRNA, cell death quantification	Human	ME-180 cells	TP63 :-: Ferroptosis	Validated	_NA_	Tumor protein 63	Q9H3D4 (P63_HUMAN)	29212036	Delta Np63 alpha in article
Suppressor	SLC7A11	Solute carrier family 7 member 11	HGNC:11059	Overexperession of SLC7A11 attenuated BAY-inhibited cell viability by ferroptosis.	Cell viability assay, qRT-PCR, shRNA, gene overexpression, western blot	Human	MDA-MB-231, MDA-MB-468, DBTRG-05MG	SLC7A11 :-: Ferroptosis	Validated	_NA_	Cystine/glutamate transporter	Q9UPY5 (XCT_HUMAN)	29274359	_NA_
Suppressor	TP53	Tumor protein p53	HGNC:11998	p53 stabilization suppresses ferroptosis. p53 suppresses metabolic stress-induced ferroptosis.	Immunoblotting, cell death quantification, time-lapse imaging	Human	HT-1080 cells	TP53 :+: CDKN1A, CDKN1A :+: GSH, GSH :-: Lipid ROS, Lipid ROS :+: Ferroptosis	Validated	Found to promote ferroptosis by other studies.	Cellular tumor antigen p53	P04637 (P53_HUMAN)	29346757	p53 in article
Suppressor	CDKN1A	Cyclin dependent kinase inhibitor 1A	HGNC:1784	Required to to suppress ferroptosis.	CRISPR, shRNA, immunoblotting, cell-cycle profile, cell death quantification	Human	HT-1080 cells	CDKN1A :+: GSH, GSH :-: Lipid ROS, Lipid ROS :+: Ferroptosis	Validated	_NA_	Cyclin-dependent kinase inhibitor 1	P38936 (CDN1A_HUMAN)	29346757	Encoding p21
Suppressor	MIR137	microRNA 137	HGNC:31523	Suppresses ferroptosis both in vitro and in vivo.	Immunoblotting, luciferase reporter assay, qRT-PCR, cell viability assay, colony formation assay, malondialdehyde assay, iron assay, flow cytometer, shRNA, xenograph mouse model	Human, mice	Melanoma cell lines A375 and G-361, C57BL/6 mice	MIR137 :-: SLC1A5, SLC1A5 :+: Glutaminolysis, Glutaminolysis :+: Lipid ROS, Lipid ROS :+: Ferroptosis	Validated	_NA_	_NA_	_NA_	29348676	_NA_
Suppressor	SLC40A1	Solute carrier family 40 member 1	HGNC:10909	Overexpression of Fpn inhibited ferroptosis.	Cell viability assay, lipid ROS measurement, RT-qPCR, western blot	Mice	TM4 Sertoli cells	SLC40A1 :-: Lipid ROS, Lipid ROS :+: Ferroptosis	Validated	_NA_	Solute carrier family 40 member 1	Q9NP59 (S40A1_HUMAN)	29436589	Fpn in article
Suppressor	GPX4	Glutathione peroxidase 4	HGNC:4556	Activation blocked ferroptosis.	Cell viability assay, lipid ROS measurement, RT-qPCR, western blot	Mice	TM4 Sertoli cells	GPX4 :-: Lipid ROS, Lipid ROS :+: Ferroptosis	Validated	_NA_	Phospholipid hydroperoxide glutathione peroxidase	P36969 (GPX4_HUMAN)	29436589	_NA_
Suppressor	GPX4	Glutathione peroxidase 4	HGNC:4556	GPX4-overexpressing cells were resistant to reactive oxygen species-induced cell death. Conversely, GPX4-knockdown cells were sensitive to reactive oxygen species-induced cell death.	Immunohistochemistry, qRT-PCR,lentiviral transduction, shRNA, flow cytometry, cell viability assay	Human	LCL-K cell	GPX4 :-: 8-OHdG, 8-OHdG :+: Ferroptosis	Deduced	The authors did not determine wether the ROS-induced cell death is related to ferroptosis or not.	Phospholipid hydroperoxide glutathione peroxidase	P36969 (GPX4_HUMAN)	29463878	_NA_
Suppressor	ENPP2	Ectonucleotide pyrophosphatase/phosphodiesterase 2	HGNC:3357	Overexpression modestly promotes migration and proliferation and significantly inhibits erastin-induced ferroptosis.	Cell viability assay, qRT-PCR, western blot, ROS measurement, ELISA	Rat	H9c2 cells	ENPP2 :-: Ferroptosis	Validated	_NA_	Ectonucleotide pyrophosphatase/phosphodiesterase family member 2	Q13822 (ENPP2_HUMAN)	29551679	_NA_
Suppressor	VDAC2	Voltage dependent anion channel 2	HGNC:12672	Overexpression could partially protect cells from ferroptosis.	Western blot, cell viability assay	Human	HT1080 cells	VDAC2 :-: Ferroptosis	Validated	_NA_	Voltage-dependent anion-selective channel protein 2	P45880 (VDAC2_HUMAN)	29569437	_NA_
Suppressor	FH	Fumarate hydratase	HGNC:3700	FH inactivation (FH-/- ) proves synthetic lethal with inducers of ferroptosis. FH-/- sensitizes cells to multiple ferroptosis inducers.	CRISPR/Cas9, sgRNA, cell viability assay, immunoblotting, qPCR,	Human	UOK262, HT1080, HK2, A498 cells	FH :+: GPX4, GPX4 :-: Ferroptosis	Validated	_NA_	Fumarate hydratase	P07954 (FUMH_HUMAN)	29917289	_NA_
Suppressor	CISD2	CDGSH iron sulfur domain 2	HGNC:24212	Overexpression conferred resistance to ferroptosis. Inhibition blocked resistance to ferroptotic cell death.	Cell viability and death assay, GSH and ROS levels and lipid peroxidation assays, RNAi, gene transfection, immunoblotting	Human	Head and neck cancer cells	CISD2 :-: Lipid ROS, Lipid ROS :+: Ferroptosis	Validated	_NA_	CDGSH iron-sulfur domain-containing protein 2	Q8N5K1 (CISD2_HUMAN)	29928961	_NA_
Suppressor	SLC40A1	Solute carrier family 40 member 1	HGNC:10909	A negative regulator of ferroptosis by reducing intracellular iron concentration. Knockdown accelerates erastin-induced ferroptosis.	Cell viability, qRT-PCR, western blot, siRNA	Human	SH-SY5Y cells	SLC40A1 :-: Lipid ROS, Lipid ROS :+: Ferroptosis	Validated	_NA_	Solute carrier family 40 member 1	Q9NP59 (S40A1_HUMAN)	29949159	Ferroportin in article
Suppressor	MIR9-1	microRNA 9-1	HGNC:31641	Overexpression of miR‐9 suppressed GOT1, which subsequently reduced ferroptosis. Suppression of miR‐9 increased the sensitivity of melanoma cells to ferroptosis inducers.	Immunoblotting, luciferase reporter assay, qPCR, cell viability assay, MDA assay, iron assay, glutamate assay	Human	A375 and G‐361 cells	MIR9 :-: GOT1, GOT1 :+: alpha KG, alpha KG :+: Lipid ROS, Lipid ROS :+: Ferroptosis	Validated	_NA_	_NA_	_NA_	30035324	miR-9 in article
Suppressor	MIR9-2	microRNA 9-2	HGNC:31642	Overexpression of miR‐9 suppressed GOT1, which subsequently reduced ferroptosis. Suppression of miR‐9 increased the sensitivity of melanoma cells to ferroptosis inducers.	Immunoblotting, luciferase reporter assay, qPCR, cell viability assay, MDA assay, iron assay, glutamate assay	Human	A375 and G‐361 cells	MIR9 :-: GOT1, GOT1 :+: alpha KG, alpha KG :+: Lipid ROS, Lipid ROS :+: Ferroptosis	Validated	_NA_	_NA_	_NA_	30035324	miR-9 in article
Suppressor	MIR9-3	microRNA 9-3	HGNC:31646	Overexpression of miR‐9 suppressed GOT1, which subsequently reduced ferroptosis. Suppression of miR‐9 increased the sensitivity of melanoma cells to ferroptosis inducers.	Immunoblotting, luciferase reporter assay, qPCR, cell viability assay, MDA assay, iron assay, glutamate assay	Human	A375 and G‐361 cells	MIR9 :-: GOT1, GOT1 :+: alpha KG, alpha KG :+: Lipid ROS, Lipid ROS :+: Ferroptosis	Validated	_NA_	_NA_	_NA_	30035324	miR-9 in article
Suppressor	CBS	Cystathionine beta-synthase	HGNC:1550	Inhibition triggers ferroptosis in hepatocellular carcinoma.	Cell viability, western blotting, LC/ESI-MS/MS, flow cytometry, xenograft mice	Human, mice	HepG2 cells, female ICR mice	CBS :-: Ferroptosis	Validated	_NA_	Cystathionine beta-synthase	P35520 (CBS_HUMAN)	30258181	_NA_
Suppressor	NFE2L2	Nuclear factor, erythroid 2 like 2	HGNC:7782	Associated with resistance to ferroptosis. Inhibition of Nrf2 sensitized cells to ferroptosis.	Cell viability and cell death assays, ROS production measurement, RNAi, gene transfection, immunoblotting	Human, mice	HNC cell line (AMC-HN2–11), SNUcell lines (SNU-1041, -1066, and -1076), athymic BALB/c male nude mice	NFE2L2 :+: FTH1, FTH1 :-: Ferroptosis, NFE2L2 :+: FPN, FPN :-: Ferroptosis, NFE2L2 :+: HO-1, HO-1 :-: Ferroptosis	Validated	_NA_	Nuclear factor erythroid 2-related factor 2	Q16236 (NF2L2_HUMAN)	30339884	Nrf2 in article
Suppressor	SQSTM1	Sequestosome 1	HGNC:11280	Inhibition of the p62 gene significantly reduced cell viability and increased cellular lipid ROS levels in HN3R cells; this was reversed by treatment with ferrostatin-1, a ferroptosis inducer.	siRNA, qPRC, fluorescent microscopy and flow cytometry, ROS production measurement	Human	HN3 cells	SQSTM1 :+: NFE2L2, NFE2L2 :+: FTH1, FTH1 :-: Ferroptosis, NFE2L2 :+: FPN, FPN :-: Ferroptosis, NFE2L2 :+: HO-1, HO-1 :-: Ferroptosis	Validated	Not test cell death or cell viability.	Sequestosome-1	Q13501 (SQSTM_HUMAN)	30339884	p62 in article.
Suppressor	GPX4	Glutathione peroxidase 4	HGNC:4556	Overexpression GPX4 resulted in decreased cell death after RSL3 treatment. Moreover, this effect was able to be reversed by overexpression of GPX4.	Cell viability, cell death, ROS determination, western blot	Human	HCT116, LoVo, and HT29 CRC cells	GPX4 :-: Ferroptosis	Validated	_NA_	Phospholipid hydroperoxide glutathione peroxidase	P36969 (GPX4_HUMAN)	30524291	_NA_
Suppressor	ISCU	Iron-sulfur cluster assembly enzyme	HGNC:29882	Over expression significantly attenuated DHA induced ferroptosis.	Cell viability, cell cycle, ROS determination, western blot, immunofluorescence, ectopic expressing, lentiviral transduction	Human	HL60, KG1, THP-1 cells	ISCU :+: GSH, GSH :-: Ferroptosis	Validated	_NA_	Iron-sulfur cluster assembly enzyme ISCU	Q9H1K1 (ISCU_HUMAN)	30557609	_NA_
Suppressor	FTH1	Ferritin heavy chain 1	HGNC:3976	FTH reconstituted cells exhibited the reduced lipid peroxides content and restored the DHA-induced ferroptosis.	Cell viability, cell cycle, ROS determination, western blot, immunofluorescence, ectopic expressing, lentiviral transduction	Human	HL60, KG1, THP-1 cells	FTH1 :-: Lipid ROS, Lipid ROS :+: Ferroptosis	Validated	_NA_	Ferritin heavy chain	P02794 (FRIH_HUMAN)	30557609	FTH in article
Suppressor	ACSL3	Acyl-CoA synthetase long chain family member 3	HGNC:3570	Required for exogenous monounsaturated fatty acids to protect cells against ferroptosis. Negatively correlates with ferroptosis sensitivity.	Dead cell count, gene knockout, confocal imaging, thin-layer chromatography, BODIPY 493/503 imaging, CRISPR/Cas9, RT-qPCR, western blot	Human	HEK293, HT-1080 cells	ACSL3 :-: Ferroptosis	Validated	_NA_	Long-chain-fatty-acid--CoA ligase 3	O95573 (ACSL3_HUMAN)	30686757	_NA_
Suppressor	OTUB1	OTU deubiquitinase, ubiquitin aldehyde binding 1	HGNC:23077	Inactivation promotes ferroptosis by down-regulating SLC7A11 levels. Overexpression is critical for tumor growth.	CRISPR/Cas9, RNAi, cell death, western blot, qRT-PCR	Human, mice	H1299, SK-N-BE(2)C, T24, UM-UC-3, SW780 cells, nude mice	OTUB1 :+: SLC7A11, SLC7A11 :-: Ferroptosis	Validated	_NA_	Ubiquitin thioesterase OTUB1	Q96FW1 (OTUB1_HUMAN)	30709928	_NA_
Suppressor	CD44	CD44 molecule (Indian blood group)	HGNC:1681	Knockdown sensitizes cells to ferroptosis.	Western blot, siRNA, cell death	Human	H1299 cells	CD44 :+: SLC7A11, SLC7A11 :-: Ferroptosis	Validated	_NA_	CD44 antigen	P16070 (CD44_HUMAN)	30709928	_NA_
Suppressor	LINC00336	Long intergenic non-protein coding RNA 336	HGNC:33813	Overexpression inhibits ferroptosis. Knockdown promotes ferroptosis.	qRT-PCR, MTT assay, colony-formation assay, lipid ROS assays, iron assay, immunoblotting	Human	A549 and SPC-A-1 cells	(LINC00336/ELAVL1) :-: Ferroptosis	Validated	_NA_	Putative uncharacterized protein encoded by LINC00336	Q6ZUF6 (NC336_HUMAN)	30787392	_NA_
Suppressor	STAT3	Signal transducer and activator of transcription 3	HGNC:11364	Upregulated in ferroptosis resistant cells. Inhibition increases ferroptosis.	Cell viability tests, ROS and lipid peroxidation measures, MDA measurement, western blot	Human	Osteosarcoma cells MG63 and Saos-2	STAT3 :-: Ferroptosis	Validated	_NA_	Signal transducer and activator of transcription 3	P40763 (STAT3_HUMAN)	30811078	_NA_
Suppressor	BRD4	Bromodomain containing 4	HGNC:13575	Inhibition induces ferroptosis.	Cell proliferation assay, migration and invasion assays, RT-PCR, western blot, immunohistochemistry, iron assay	Human	MDA-MB-231, Hs578T, H1299, A549 and MCF-10A cells, female athymic BALB/c nude mice	BRD4 :-: Ferritinophagy, Ferritinophagy :+: Lipid ROS, Lipid ROS :+: Ferroptosis	Validated	_NA_	Bromodomain-containing protein 4	O60885 (BRD4_HUMAN)	30988278	_NA_
Suppressor	PRDX6	Peroxiredoxin 6	HGNC:16753	A negative regulator of ferroptotic cell death.	Western blot, flow cytometry, SRB assay, gene transfection, shRNA, LOOH quantification	Human	H1299 cells	PRDX6 :-: Lipid ROS, Lipid ROS :+: Ferroptosis	Validated	_NA_	Peroxiredoxin-6	P30041 (PRDX6_HUMAN)	31036877	_NA_
Suppressor	MIR17	microRNA 17	HGNC:31547	Protects endothelial HUVEC cells from erastin-induced ferroptosis. Overexpression significantly reduced erastin-induced growth inhibition and ROS generation of HUVEC cells.	Lentivirus transduction, CCK-8 assay, DYE670 staining assay, ROS staining assay, RT-qPCR, western blot	Human	HUVEC cells	MIR17 :-: A20, A20 :+: ACSL4, ACSL4 :+: Lipid ROS, A20 :-: GPX4, GPX4 :-: Lipid ROS, Lipid ROS :+: Ferroptosis	Validated	_NA_	_NA_	_NA_	31160087	miR-17-92 in article
Suppressor	SCD	Stearoyl-CoA desaturase	HGNC:10571	Inhibition of SCD1 induces ferroptotic cell death. Expression of SCD1 protects cells from ferroptosis.	Cell viability, cell death, BODIPY staining, siRNA, RT-qPCR, western blot, gene overexpression,	Human, mice	OVCAR-4, COV362, FT-t cells, mouse orthotopic xenograft model	SCD :+: CoQ10, CoQ10 :-: Ferroptosis	Validated	_NA_	Acyl-CoA desaturase	O00767 (ACOD_HUMAN)	31270077	SCD1 in article
Suppressor	SESN2	Sestrin 2	HGNC:20746	Has cytoprotective effect against ferroptosis. In cells expressing Sesn2, erastin-induced cell death, ROS formation, and glutathione depletion were almost completely inhibited compared to that in control cells.	MTT assay, RT-PCR, luciferase assay, immunoblot, siRNA, Lipid peroxidation assay, GSH measurement	Human, mice	HepG2 and AML-12 cell lines, mouse embryonic fibroblasts cells, ICR mice	SESN2 :-: Lipid ROS, Lipid ROS :+: Ferroptosis	Validated	_NA_	Sestrin-2	P58004 (SESN2_HUMAN)	31323261	Sesn2 in article
Suppressor	NF2	Neurofibromin 2	HGNC:7773	Genetic inactivation of NF2 rendered cancer cells more sensitive to ferroptosis. Mediates cell density-dependent inhibition of ferroptosis.	Cell death, cell viability, lipid peroxidation, immunoblotting, CRISPR/Cas9, ChIP assay, qRT-PCR	Human, mice	Mouse embryonic fibroblasts, NF639 cells, human epithelial tumour cells, human mesothelioma cells, xenograft mouse	NF2 :-: YAP, YAP :+: Ferroptosis	Validated	_NA_	Merlin	P35240 (MERL_HUMAN)	31341276	Also known as merlin
Suppressor	ARNTL	Aryl hydrocarbon receptor nuclear translocator like	HGNC:701	Degration of the protein is critical for ferroptosis. Blocking ARNTL degradation diminished ferroptotic tumor cell death.	Cytotoxicity assays, western blot, immunoprecipitation, RNA interference, gene transfection, qPCR, MDA assay	Human, mice	Calu-1, THP1, HT1080, and HL-60 cells, athymic nude mice	ARNTL :-: EGLN2, EGLN2 :-: HIF1A, HIF1A :-: Lipid ROS, Lipid ROS :+: Ferroptosis	Validated	_NA_	Aryl hydrocarbon receptor nuclear translocator-like protein 1	O00327 (BMAL1_HUMAN)	31355331	_NA_
Suppressor	HIF1A	Hypoxia inducible factor 1 subunit alpha	HGNC:4910	Destabilizing HIF1A facilitated ferroptotic tumor cell death.	Cytotoxicity assays, western blot, immunoprecipitation, RNA interference, gene transfection, qPCR, MDA assay	Human, mice	Calu-1, THP1, HT1080, and HL-60 cells, athymic nude mice	HIF1A :-: Lipid ROS, Lipid ROS :+: Ferroptosis	Validated	_NA_	Hypoxia-inducible factor 1-alpha	Q16665 (HIF1A_HUMAN)	31355331	_NA_
Suppressor	JUN	Jun proto-oncogene, AP-1 transcription factor subunit	HGNC:6204	O-GlcNAcylated c-Jun represents an obstructive factor to ferroptosis.	Immunofluorescence, western blotting, immunohistochemistry, cell viability, colony formation, qPCR, lipid peroxidation assay, iron assay	Human, mice	Bel-7402, SMMC-7721 cells, athymic nude mice	JUN :+: GSH, GSH :-: Ferroptosis, JUN :+: PSAT1, PSAT1 :-: Ferroptosis, JUN :+: CBS, CBS :-: Ferroptosis	Deduced	_NA_	Transcription factor AP-1	P05412 (JUN_HUMAN)	31394193	c-Jun in article
Suppressor	CA9	Carbonic anhydrase 9	HGNC:1383	Inhibition induces ferroptosis.	qRT-PCR, western blot, cell viability assay, siRNA, ROS detection	Human	Mesothelioma cell lines ACC-Meso-1, NCI-H2373 and NCI-H2052, mesothelial cell line MeT-5A	CA9 :-: Ferroptosis	Validated	_NA_	Carbonic anhydrase 9	Q16790 (CAH9_HUMAN)	31442913	_NA_
Suppressor	HSPA5	Heat shock protein family A (Hsp70) member 5	HGNC:5238	Knockdown of GRP78 enhanced artesunate-induced ferroptosis of pancreatic cancer cells.	Fluorescent staining, CCK8, Western blot, shRNA, qRT-PCR	Human, mice	Pancreatic cancer cells AsPC-1 and PaTU8988, BALB/c nude mice	GRP78 :-: Lipid ROS, Lipid ROS :+: Ferroptosis	Validated	_NA_	Endoplasmic reticulum chaperone BiP	P11021 (BIP_HUMAN)	31456633	GRP78 in article
Suppressor	TMBIM4	Transmembrane BAX inhibitor motif containing 4	HGNC:24257	Protects against ferroptosis in HCC cells. Inhibition increased ferroptotic cel death.	Cell viability and clonogenic survival assay, immunofluorescence, western blot, RNAi, gene transfection, qRT-PCR, lipid peroxidation assay	Human, mice	Hep G2, Huh‐7, SMMC‐7721 and PLC/PRF/5 cells, nude mice	S1R :-: Ferroptosis	Validated	_NA_	Protein lifeguard 4	Q9HC24 (LFG4_HUMAN)	31507082	S1R in article
Suppressor	HSPA5	Heat shock protein family A (Hsp70) member 5	HGNC:5238	Serves as a negative regulator of DHA-induced ferroptosis.	Cell viability, colony formation, cell death, lipid ROS assay, GSH determination, siRNA, western blot, RT-PCR, xenograft tumor model	Human, mice	Glioma cell lines U251 and U373, mouse hippocampal neuronal cell line HT22, athymic nude BALB/c mice	HSPA5 :+: GPX4, GPX4 :-: Ferroptosis	Predicted	_NA_	Endoplasmic reticulum chaperone BiP	P11021 (BIP_HUMAN)	31519193	_NA_
Suppressor	PLIN2	Perilipin 2	HGNC:248	An indispensable gene and protein in the suppression of ferroptosis caused by abnormal lipometabolism in gastric carcinoma.	Cell proliferation and clonogenic assay, cell survival analysis, xenografts tumor, RNA-seq, RT‑qPCR, ROS assay	Human, mice	SGC7901 and MGC803 cells, nude mice	PLIN2 :-: Ferroptosis	Screened	_NA_	Perilipin-2	Q99541 (PLIN2_HUMAN)	31520166	Also known as ADRP
Suppressor	MIR212	microRNA 212	HGNC:31589	Overexpression of miR-212-5p attenuated ferroptosis while downregulation of miR-212-5p promoted ferroptotic cell death.	Controlled cortical impact model, iron assay, MDA assay, RT-PCR, western blotting, cell death	Mice	HT22 and Neuro-2a cells, C57BL/6 J mice	(miR-212-5p/Ptgs2) :-: Ferroptosis	Validated	_NA_	_NA_	_NA_	31533781	miR-212-5p in article
Suppressor	Fer1HCH	Ferritin 1 Heavy Chain Homolog	_NA_	Reduced heavy chain levels caused severe mitochondrial defects and ferroptosis.	RT-qPCR, immunohistochemistry, EdU staining, TUNEL staining	Drosophila	Fly	Fer1HCH :-: ROS, ROS :+: Ferroptosis	Predicted	_NA_	Ferritin	H1UUD2 (H1UUD2_DROME)	31568497	_NA_
Suppressor	AIFM2	Apoptosis inducing factor mitochondria associated 2	HGNC:21411	A glutathione-independent ferroptosis suppressor. Pharmacological targeting of FSP1 strongly synergizes with GPX4 inhibitors to trigger ferroptosis.	Expression cloning, cell death, cell viability, LDH assay, western blot, LC-MS, NADH consumption assay	Human, mice	MCF-7, HT1080, Pfa1 cells	FPS1 :+: CoQ10, CoQ10 :-: Lipid ROS, Lipid ROS :+: Ferroptosis	Validated	_NA_	Apoptosis-inducing factor 2	Q9BRQ8 (AIFM2_HUMAN)	31634899	FSP1 in article
Suppressor	AIFM2	Apoptosis inducing factor mitochondria associated 2	HGNC:21411	A potent ferroptosis-resistance factor. Positively correlates with ferroptosis resistance.	Synthetic lethal CRISPR-Cas9 screen, cell death, western blotting, lipid droplet fractionation, glutathione measurement, tumour xenograft growth, CoQ measurement	Human, mice	U-2 OS cell line, NCI-H460, NCI-H2291, NCI-H1703 and NCIH446 cells, C.B17 SCID mice	FPS1 :+: CoQ10, CoQ10 :-: Lipid ROS, Lipid ROS :+: Ferroptosis	Validated	_NA_	Apoptosis-inducing factor 2	Q9BRQ8 (AIFM2_HUMAN)	31634900	FSP1 in article
Suppressor	LAMP2	Lysosomal associated membrane protein 2	HGNC:6501	Knockdown promoted ferroptosis.	Cell viability, western blot, ROS induction, glutathione assay, lipid peroxidation assay	Human	ARPE-19, hfRPE cells	LAMP2 :+: Cysteine, Cysteine :+: GSH, GSH :-: Lipid ROS, Lipid ROS :+: Ferroptosis	Validated	_NA_	Lysosome-associated membrane glycoprotein 2	P13473 (LAMP2_HUMAN)	31672277	_NA_
Suppressor	ZFP36	ZFP36 ring finger protein	HGNC:12862	ZFP36 plasmid impaired FBXW7 plasmid-induced HSC ferroptosis. Overexpression of Zfp36 impaired erastin- or sorafenib-induced ferroptosis.	Cell viability, lipid peroxidation, iron, GSH and ROS assays, western blot, RT-PCR, RNA-seq	Human, mice	Hepatic stellate cells, C57BL/6 mice	ZFP36 :-: ATG16L1, ATG16L1 :+: Ferroptosis	Validated	_NA_	mRNA decay activator protein ZFP36	P26651 (TTP_HUMAN)	31679460	_NA_
Suppressor	GPX4	Glutathione peroxidase 4	HGNC:4556	Depletion or inhibition resulted in cell death by ferroptosis.	Quantitative proteomic analysis, siRNA, RNA-seq and qRT-PCR, cell viability, lipid peroxidation assay, GSH measurement, western blot	Human, mice, rat	H9c2 and C2C12 cells, rat ventricular myocytes, C57BL/6 mice	GPX4 :-: Lipid ROS, Lipid ROS :+: Ferroptosis	Validated	_NA_	Phospholipid hydroperoxide glutathione peroxidase	P36969 (GPX4_HUMAN)	31685805	_NA_
Suppressor	PROM2	Prominin 2	HGNC:20685	Induced by ferroptotic stress and promotes resistance to ferroptotic cell death. Facilitates ferroptosis resistance in mammary epithelial and breast carcinoma cells.	RNA-seq, western blot, qPCR, siRNA, cell count, cell death, iron assay	Human	MCF10A, Hs578t and MDA-MB-231 cells	Prominin2 :+: Ferritin-containing MVB, Ferritin-containing MVB :-: Ferroptosis	Validated	_NA_	Prominin-2	Q8N271 (PROM2_HUMAN)	31735663	Prominin2 in article
Suppressor	CHMP5	Charged multivesicular body protein 5	HGNC:26942	Ferroptosis activators increase ESCRT-III subunits (e.g., CHMP5 and CHMP6). Knockdown of CHMP5 or CHMP6 sensitizes human cancer cells to ferroptosis.	RNAi, western blot, iron, malondialdehyde and cytotoxicity assays	Human, mice	PANC1 and HepG2 cells, athymic nude or B6 mice	CHMP5 :-: Ferroptosis	Validated	_NA_	Charged multivesicular body protein 5	Q9NZZ3 (CHMP5_HUMAN)	31761326	_NA_
Suppressor	CHMP6	Charged multivesicular body protein 6	HGNC:25675	Ferroptosis activators increase ESCRT-III subunits (e.g., CHMP5 and CHMP6). Knockdown of CHMP5 or CHMP6 sensitizes human cancer cells to ferroptosis.	RNAi, western blot, iron, malondialdehyde and cytotoxicity assays	Human, mice	PANC1 and HepG2 cells, athymic nude or B6 mice	CHMP6 :-: Ferroptosis	Validated	_NA_	Charged multivesicular body protein 6	Q96FZ7 (CHMP6_HUMAN)	31761326	_NA_
Suppressor	AKR1C1	Aldo-keto reductase family 1 member C1	HGNC:384	Inhibition completely resensitizes resistant melanoma cells to ferroptosis execution.	RNAi, cell transfection, western blotting, qRT-PCR, cell viability, lipid peroxides evaluation	Human	MeWo, A2058, SK-Mel 5, SK-Mel 24, C8161, CHL-1, and A375 cells	AKR1C1 :-: Lipid ROS, Lipid ROS :+: Ferroptosis	Validated	_NA_	Aldo-keto reductase family 1 member C1	Q04828 (AK1C1_HUMAN)	31780644	_NA_
Suppressor	AKR1C2	Aldo-keto reductase family 1 member C2	HGNC:385	Inhibition completely resensitizes resistant melanoma cells to ferroptosis execution.	RNAi, cell transfection, western blotting, qRT-PCR, cell viability, lipid peroxides evaluation	Human	MeWo, A2058, SK-Mel 5, SK-Mel 24, C8161, CHL-1, and A375 cells	AKR1C2 :-: Lipid ROS, Lipid ROS :+: Ferroptosis	Validated	_NA_	Aldo-keto reductase family 1 member C2	P52895 (AK1C2_HUMAN)	31780644	_NA_
Suppressor	AKR1C3	Aldo-keto reductase family 1 member C3	HGNC:386	Inhibition completely resensitizes resistant melanoma cells to ferroptosis execution.	RNAi, cell transfection, western blotting, qRT-PCR, cell viability, lipid peroxides evaluation	Human	MeWo, A2058, SK-Mel 5, SK-Mel 24, C8161, CHL-1, and A375 cells	AKR1C3 :-: Lipid ROS, Lipid ROS :+: Ferroptosis	Validated	_NA_	Aldo-keto reductase family 1 member C3	P42330 (AK1C3_HUMAN)	31780644	_NA_
Suppressor	CBS	Cystathionine beta-synthase	HGNC:1550	Knockdown in erastin-resistant cells caused ferroptotic cell death, while overexpression conferred ferroptosis resistance.	RNAi, cell viability, ROS analysis, GSH, glutamate release and cystine uptake assays, western blotting, qRT-PCR	Human	SKOV3 and OVCA429 cells	CBS :+: Cystathionine, Cystathionine :+: Cysteine, Cysteine :+: GSH, GSH :-: Lipid ROS, Lipid ROS :+: Ferroptosis	Validated	_NA_	Cystathionine beta-synthase	P35520 (CBS_HUMAN)	31819185	_NA_
Suppressor	NFE2L2	Nuclear factor, erythroid 2 like 2	HGNC:7782	Genetically repression of NRF2 enhanced ferroptosis susceptibility.	RNAi, cell viability, ROS analysis, GSH, glutamate release and cystine uptake assays, western blotting, qRT-PCR	Human	SKOV3 and OVCA429 cells	NFE2L2 :+: CBS :+: Cystathionine, Cystathionine :+: Cysteine, Cysteine :+: GSH, GSH :-: Lipid ROS, Lipid ROS :+: Ferroptosis	Validated	_NA_	Nuclear factor erythroid 2-related factor 2	Q16236 (NF2L2_HUMAN)	31819185	NRF2 in article
Suppressor	CAV1	Caveolin 1	HGNC:1527	Cav-1 deficiency aggravated ferroptosis. Short hairpin RNA of Cav-1 promoted ferroptosis, which was ameliorated by Cav-1 overexpression.	Immunofluorescence, western blot, ROS detection	Human, mice	LO2 cells, mice model	CAV-1 :+: xCT, xCT :+: GPX4, GPX4 :-: Ferroptosis, CAV-1 :-: RNS, RNS :+: Ferroptosis	Validated	_NA_	Caveolin-1	Q03135 (CAV1_HUMAN)	31877357	Cav-1 in article
Suppressor	GCH1	GTP cyclohydrolase 1	HGNC:4193	Gch1 overexpression and its downstream metabolites BH4/BH2 rescue from ferroptosis. Inhibition of GCH1 activity can sensitize resistant cancer cells to ferroptosis induction.	CRISPR activation screening, qRT-PCR, cell viability, cell counts, western blot	Human	HT-1080,786-O, A-498, Caki-1, AU565, DU4475, MCF-7 cells	GCH1 :+: Phospholipid, Phospholipid :-: Ferroptosis, GCH1 :+: COQ10, COQ10 :-: Lipid ROS, Lipid ROS :+: Ferroptosis	Validated	_NA_	GTP cyclohydrolase 1	P30793 (GCH1_HUMAN)	31989025	_NA_
Marker	PTGS2	Prostaglandin-endoperoxide synthase 2	HGNC:9605	Simply a downstream marker of ferroptosis. The most upregulated gene in BJeLR cells upon treatment with either erastin or (1S, 3R)-RSL3, but ferroptotic cell death was not affected by inhibition of the enzyme.	RT-qPCR, cell viability	Human	BJeLR cells	Validated	_NA_	Prostaglandin G/H synthase 2	P35354 (PGH2_HUMAN)	24439385	May promote ferroptosis.
Marker	DUSP1	Dual specificity phosphatase 1	HGNC:3064	Expression was upregulated during ferroptosis induced by erastin or RSL3.	RT-qPCR, cell viability	Human	BJeLR cells	Deduced	Inferred as ferroptotic marker because of change (|delta ct| > 2) in gene expression.	Dual specificity protein phosphatase 1	P28562 (DUS1_HUMAN)	24439385	May promote ferroptosis.
Marker	NOS2	Nitric oxide synthase 2	HGNC:7873	Expression was upregulated during ferroptosis induced by erastin or RSL3.	RT-qPCR, cell viability	Human	BJeLR cells	Deduced	Inferred as ferroptotic marker because of change (|delta ct| > 2) in gene expression.	Nitric oxide synthase	P35228 (NOS2_HUMAN)	24439385	May promote ferroptosis.
Marker	NCF2	Neutrophil cytosolic factor 2	HGNC:7661	Expression was upregulated during ferroptosis induced by erastin or RSL3.	RT-qPCR, cell viability	Human	BJeLR cells	Deduced	Inferred as ferroptotic marker because of change (|delta ct| > 2) in gene expression.	Neutrophil cytosol factor 2	P19878 (NCF2_HUMAN)	24439385	May promote ferroptosis.
Marker	MT3	Metallothionein 3	HGNC:7408	Expression was upregulated during ferroptosis induced by erastin or RSL3.	RT-qPCR, cell viability	Human	BJeLR cells	Deduced	Inferred as ferroptotic marker because of change (|delta ct| > 2) in gene expression.	Metallothionein-3	P25713 (MT3_HUMAN)	24439385	May promote ferroptosis.
Marker	UBC	Ubiquitin C	HGNC:12468	Expression was upregulated during ferroptosis induced by erastin or RSL3.	RT-qPCR, cell viability	Human	BJeLR cells	Deduced	Inferred as ferroptotic marker because of change (|delta ct| > 2) in gene expression.	Polyubiquitin-C	P0CG48 (UBC_HUMAN)	24439385	May promote ferroptosis.
Marker	ALB	Albumin	HGNC:399	Expression was upregulated during ferroptosis induced by erastin or RSL3.	RT-qPCR, cell viability	Human	BJeLR cells	Deduced	Inferred as ferroptotic marker because of change (|delta ct| > 2) in gene expression.	Serum albumin	P02768 (ALBU_HUMAN)	24439385	May promote ferroptosis.
Marker	TXNRD1	Thioredoxin reductase 1	HGNC:12437	Expression was upregulated during ferroptosis induced by erastin or RSL3.	RT-qPCR, cell viability	Human	BJeLR cells	Deduced	Inferred as ferroptotic marker because of change (|delta ct| > 2) in gene expression.	Thioredoxin reductase 1	Q16881 (TRXR1_HUMAN)	24439385	May promote ferroptosis.
Marker	SRXN1	Sulfiredoxin 1	HGNC:16132	Expression was upregulated during ferroptosis induced by erastin or RSL3.	RT-qPCR, cell viability	Human	BJeLR cells	Deduced	Inferred as ferroptotic marker because of change (|delta ct| > 2) in gene expression.	Sulfiredoxin-1	Q9BYN0 (SRXN1_HUMAN)	24439385	May promote ferroptosis.
Marker	GPX2	Glutathione peroxidase 2	HGNC:4554	Expression was upregulated during ferroptosis induced by erastin or RSL3.	RT-qPCR, cell viability	Human	BJeLR cells	Deduced	Inferred as ferroptotic marker because of change (|delta ct| > 2) in gene expression.	Glutathione peroxidase 2	P18283 (GPX2_HUMAN)	24439385	May promote ferroptosis.
Marker	BNIP3	BCL2 interacting protein 3	HGNC:1084	Expression was upregulated during ferroptosis induced by erastin or RSL3.	RT-qPCR, cell viability	Human	BJeLR cells	Deduced	Inferred as ferroptotic marker because of change (|delta ct| > 2) in gene expression.	BCL2/adenovirus E1B 19 kDa protein-interacting protein 3	Q12983 (BNIP3_HUMAN)	24439385	May promote ferroptosis.
Marker	OXSR1	Oxidative stress responsive kinase 1	HGNC:8508	Expression was upregulated during ferroptosis induced by erastin or RSL3.	RT-qPCR, cell viability	Human	BJeLR cells	Deduced	Inferred as ferroptotic marker because of change (|delta ct| > 2) in gene expression.	Serine/threonine-protein kinase OSR1	O95747 (OXSR1_HUMAN)	24439385	May promote ferroptosis.
Marker	SELENOS	Selenoprotein S	HGNC:30396	Expression was upregulated during ferroptosis induced by erastin or RSL3.	RT-qPCR, cell viability	Human	BJeLR cells	Deduced	Inferred as ferroptotic marker because of change (|delta ct| > 2) in gene expression.	Selenoprotein S	Q9BQE4 (SELS_HUMAN)	24439385	SELS in article. May promote ferroptosis.
Marker	ANGPTL7	Angiopoietin like 7	HGNC:24078	Expression was downregulated during ferroptosis induced by erastin or RSL3.	RT-qPCR, cell viability	Human	BJeLR cells	Deduced	Inferred as ferroptotic marker because of change (|delta ct| > 2) in gene expression.	Angiopoietin-related protein 7	O43827 (ANGL7_HUMAN)	24439385	May promote ferroptosis.
Marker	CHAC1	ChaC glutathione specific gamma-glutamylcyclotransferase 1	HGNC:28680	Up-regulated in erastin-treated samples. A useful pharmacodynamic marker of system Xc- inhibition.	RNA-seq, RT-qPCR	Human	HT-1080 and Calu-1 cells	Validated	Further study needed to confirm connection to ferroptosis.	Glutathione-specific gamma-glutamylcyclotransferase 1	Q9BUX1 (CHAC1_HUMAN)	24844246	_NA_
Marker	SLC7A11	Solute carrier family 7 member 11	HGNC:11059	Similar to erastin treatment, silencing of this gene inhibits glutamate release. Erastin specifically inhibits SLC7A11-dependent system Xc- function.	RNA silencing, RT-qPCR	Human	HT-1080 cells	Deduced	Further study needed to confirm connection to ferroptosis.	Cystine/glutamate transporter	Q9UPY5 (XCT_HUMAN)	24844246	May inhibit ferroptosis.
Marker	DDIT4	DNA damage inducible transcript 4	HGNC:24944	Up-regulated (>= 2 fold) in erastin-treated samples.	RNA-seq	Human	HT-1080 cells	Screened	Further study needed to confirm connection to ferroptosis.	DNA damage-inducible transcript 4 protein	Q9NX09 (DDIT4_HUMAN)	24844246	May promote ferroptosis.
Marker	LOC284561	_NA_	_NA_	Up-regulated (>= 2 fold) in erastin-treated samples.	RNA-seq	Human	HT-1080 cells	Screened	Further study needed to confirm connection to ferroptosis.	_NA_	_NA_	24844246	Not found in HGNC. May promote ferroptosis.
Marker	ASNS	Asparagine synthetase (glutamine-hydrolyzing)	HGNC:753	Up-regulated (>= 2 fold) in erastin-treated samples.	RNA-seq	Human	HT-1080 cells	Screened	Further study needed to confirm connection to ferroptosis.	Asparagine synthetase [glutamine-hydrolyzing]	P08243 (ASNS_HUMAN)	24844246	May promote ferroptosis.
Marker	TSC22D3	TSC22 domain family member 3	HGNC:3051	Up-regulated (>= 2 fold) in erastin-treated samples.	RNA-seq	Human	HT-1080 cells	Screened	Further study needed to confirm connection to ferroptosis.	TSC22 domain family protein 3	Q99576 (T22D3_HUMAN)	24844246	May promote ferroptosis.
Marker	DDIT3	DNA damage inducible transcript 3	HGNC:2726	Up-regulated (>= 2 fold) in erastin-treated samples.	RNA-seq	Human	HT-1080 cells	Screened	Further study needed to confirm connection to ferroptosis.	DDIT3 upstream open reading frame protein	P0DPQ6 (DT3UO_HUMAN)	24844246	May promote ferroptosis.
Marker	JDP2	Jun dimerization protein 2	HGNC:17546	Up-regulated (>= 2 fold) in erastin-treated samples.	RNA-seq	Human	HT-1080 cells	Screened	Further study needed to confirm connection to ferroptosis.	Jun dimerization protein 2	Q8WYK2 (JDP2_HUMAN)	24844246	May promote ferroptosis.
Marker	SESN2	Sestrin 2	HGNC:20746	Up-regulated (>= 2 fold) in erastin-treated samples.	RNA-seq	Human	HT-1080 cells	Screened	Further study needed to confirm connection to ferroptosis.	Sestrin-2	P58004 (SESN2_HUMAN)	24844246	May promote ferroptosis.
Marker	SLC1A4	Solute carrier family 1 member 4	HGNC:10942	Up-regulated (>= 2 fold) in erastin-treated samples.	RNA-seq	Human	HT-1080 cells	Screened	Further study needed to confirm connection to ferroptosis.	Neutral amino acid transporter A	P43007 (SATT_HUMAN)	24844246	May promote ferroptosis.
Marker	PCK2	Phosphoenolpyruvate carboxykinase 2, mitochondrial	HGNC:8725	Up-regulated (>= 2 fold) in erastin-treated samples.	RNA-seq	Human	HT-1080 cells	Screened	Further study needed to confirm connection to ferroptosis.	Phosphoenolpyruvate carboxykinase [GTP]	Q16822 (PCKGM_HUMAN)	24844246	May promote ferroptosis.
Marker	TXNIP	Thioredoxin interacting protein	HGNC:16952	Up-regulated (>= 2 fold) in erastin-treated samples.	RNA-seq	Human	HT-1080 cells	Screened	Further study needed to confirm connection to ferroptosis.	Thioredoxin-interacting protein	Q9H3M7 (TXNIP_HUMAN)	24844246	May promote ferroptosis.
Marker	VLDLR	Very low density lipoprotein receptor	HGNC:12698	Up-regulated (>= 2 fold) in erastin-treated samples.	RNA-seq	Human	HT-1080 cells	Screened	Further study needed to confirm connection to ferroptosis.	Very low-density lipoprotein receptor	P98155 (VLDLR_HUMAN)	24844246	May promote ferroptosis.
Marker	GPT2	Glutamic--pyruvic transaminase 2	HGNC:18062	Up-regulated (>= 2 fold) in erastin-treated samples.	RNA-seq	Human	HT-1080 cells	Screened	Further study needed to confirm connection to ferroptosis.	Alanine aminotransferase 2	Q8TD30 (ALAT2_HUMAN)	24844246	May promote ferroptosis.
Marker	PSAT1	Phosphoserine aminotransferase 1	HGNC:19129	Up-regulated (>= 2 fold) in erastin-treated samples.	RNA-seq	Human	HT-1080 cells	Screened	Further study needed to confirm connection to ferroptosis.	Phosphoserine aminotransferase	Q9Y617 (SERC_HUMAN)	24844246	May promote ferroptosis.
Marker	LURAP1L	Leucine rich adaptor protein 1 like	HGNC:31452	Up-regulated (>= 2 fold) in erastin-treated samples.	RNA-seq	Human	HT-1080 cells	Screened	Further study needed to confirm connection to ferroptosis.	Leucine rich adaptor protein 1-like	Q8IV03 (LUR1L_HUMAN)	24844246	C9ORF150 in article. May promote ferroptosis.
Marker	SLC7A5	Solute carrier family 7 member 5	HGNC:11063	Up-regulated (>= 2 fold) in erastin-treated samples.	RNA-seq	Human	HT-1080 cells	Screened	Further study needed to confirm connection to ferroptosis.	Large neutral amino acids transporter small subunit 1	Q01650 (LAT1_HUMAN)	24844246	May promote ferroptosis.
Marker	HERPUD1	Homocysteine inducible ER protein with ubiquitin like domain 1	HGNC:13744	Up-regulated (>= 2 fold) in erastin-treated samples.	RNA-seq	Human	HT-1080 cells	Screened	Further study needed to confirm connection to ferroptosis.	Homocysteine-responsive endoplasmic reticulum-resident ubiquitin-like domain member 1 protein	Q15011 (HERP1_HUMAN)	24844246	May promote ferroptosis.
Marker	XBP1	X-box binding protein 1	HGNC:12801	Up-regulated (>= 2 fold) in erastin-treated samples.	RNA-seq	Human	HT-1080 cells	Screened	Further study needed to confirm connection to ferroptosis.	X-box-binding protein 1	P17861 (XBP1_HUMAN)	24844246	May promote ferroptosis.
Marker	ATF3	Activating transcription factor 3	HGNC:785	Up-regulated (>= 2 fold) in erastin-treated samples.	RNA-seq	Human	HT-1080 cells	Screened	Further study needed to confirm connection to ferroptosis.	Cyclic AMP-dependent transcription factor ATF-3	P18847 (ATF3_HUMAN)	24844246	May promote ferroptosis.
Marker	SLC3A2	Solute carrier family 3 member 2	HGNC:11026	Up-regulated (>= 2 fold) in erastin-treated samples.	RNA-seq	Human	HT-1080 cells	Screened	Further study needed to confirm connection to ferroptosis.	4F2 cell-surface antigen heavy chain	P08195 (4F2_HUMAN)	24844246	May promote ferroptosis.
Marker	CBS	Cystathionine beta-synthase	HGNC:1550	Up-regulated (>= 2 fold) in erastin-treated samples.	RNA-seq	Human	HT-1080 cells	Screened	Further study needed to confirm connection to ferroptosis.	Cystathionine beta-synthase	P35520 (CBS_HUMAN)	24844246	May promote ferroptosis.
Marker	ATF4	Activating transcription factor 4	HGNC:786	Up-regulated (>= 2 fold) in erastin-treated samples.	RNA-seq	Human	HT-1080 cells	Screened	Further study needed to confirm connection to ferroptosis.	Cyclic AMP-dependent transcription factor ATF-4	P18848 (ATF4_HUMAN)	24844246	May promote ferroptosis.
Marker	ZNF419	Zinc finger protein 419	HGNC:20648	Up-regulated (>= 2 fold) in erastin-treated samples.	RNA-seq	Human	HT-1080 cells	Screened	Further study needed to confirm connection to ferroptosis.	Zinc finger protein 419	Q96HQ0 (ZN419_HUMAN)	24844246	May promote ferroptosis.
Marker	KLHL24	Kelch like family member 24	HGNC:25947	Up-regulated (>= 2 fold) in erastin-treated samples.	RNA-seq	Human	HT-1080 cells	Screened	Further study needed to confirm connection to ferroptosis.	Kelch-like protein 24	Q6TFL4 (KLH24_HUMAN)	24844246	May promote ferroptosis.
Marker	TRIB3	Tribbles pseudokinase 3	HGNC:16228	Up-regulated (>= 2 fold) in erastin-treated samples.	RNA-seq	Human	HT-1080 cells	Screened	Further study needed to confirm connection to ferroptosis.	Tribbles homolog 3	Q96RU7 (TRIB3_HUMAN)	24844246	May promote ferroptosis.
Marker	ZFP69B	ZFP69 zinc finger protein B	HGNC:28053	Up-regulated (>= 2 fold) in erastin-treated samples.	RNA-seq	Human	HT-1080 cells	Screened	Further study needed to confirm connection to ferroptosis.	Zinc finger protein 69 homolog B	Q9UJL9 (ZF69B_HUMAN)	24844246	ZNF643 in article. May promote ferroptosis.
Marker	ATP6V1G2	ATPase H+ transporting V1 subunit G2	HGNC:862	Up-regulated (>= 2 fold) in erastin-treated samples.	RNA-seq	Human	HT-1080 cells	Screened	Further study needed to confirm connection to ferroptosis.	V-type proton ATPase subunit G 2	O95670 (VATG2_HUMAN)	24844246	May promote ferroptosis.
Marker	VEGFA	Vascular endothelial growth factor A	HGNC:12680	Up-regulated (>= 2 fold) in erastin-treated samples.	RNA-seq	Human	HT-1080 cells	Screened	Further study needed to confirm connection to ferroptosis.	Vascular endothelial growth factor A	P15692 (VEGFA_HUMAN)	24844246	May promote ferroptosis.
Marker	GDF15	Growth differentiation factor 15	HGNC:30142	Up-regulated (>= 2 fold) in erastin-treated samples.	RNA-seq	Human	HT-1080 cells	Screened	Further study needed to confirm connection to ferroptosis.	Growth/differentiation factor 15	Q99988 (GDF15_HUMAN)	24844246	May promote ferroptosis.
Marker	TUBE1	Tubulin epsilon 1	HGNC:20775	Up-regulated (>= 2 fold) in erastin-treated samples.	RNA-seq	Human	HT-1080 cells	Screened	Further study needed to confirm connection to ferroptosis.	Tubulin epsilon chain	Q9UJT0 (TBE_HUMAN)	24844246	May promote ferroptosis.
Marker	ARRDC3	Arrestin domain containing 3	HGNC:29263	Up-regulated (>= 2 fold) in erastin-treated samples.	RNA-seq	Human	HT-1080 cells	Screened	Further study needed to confirm connection to ferroptosis.	Arrestin domain-containing protein 3	Q96B67 (ARRD3_HUMAN)	24844246	May promote ferroptosis.
Marker	CEBPG	CCAAT enhancer binding protein gamma	HGNC:1837	Up-regulated (>= 2 fold) in erastin-treated samples.	RNA-seq	Human	HT-1080 cells	Screened	Further study needed to confirm connection to ferroptosis.	CCAAT/enhancer-binding protein gamma	P53567 (CEBPG_HUMAN)	24844246	May promote ferroptosis.
Marker	SNORA16A	Small nucleolar RNA, H/ACA box 16A	HGNC:32605	Down-regulated (>= 2 fold) in erastin-treated samples.	RNA-seq	Human	HT-1080 cells	Screened	Further study needed to confirm connection to ferroptosis.	_NA_	_NA_	24844246	May inhibit ferroptosis.
Marker	RGS4	Regulator of G protein signaling 4	HGNC:10000	Down-regulated (>= 2 fold) in erastin-treated samples.	RNA-seq	Human	HT-1080 cells	Screened	Further study needed to confirm connection to ferroptosis.	Regulator of G-protein signaling 4	P49798 (RGS4_HUMAN)	24844246	May inhibit ferroptosis.
Marker	BLOC1S5-TXNDC5	BLOC1S5-TXNDC5 readthrough (NMD candidate)	HGNC:42001	Down-regulated (>= 2 fold) in erastin-treated samples.	RNA-seq	Human	HT-1080 cells	Screened	Further study needed to confirm connection to ferroptosis.	_NA_	_NA_	24844246	MUTED-TXNDC5 in article. May inhibit ferroptosis.
Marker	LOC390705	_NA_	_NA_	Down-regulated (>= 2 fold) in erastin-treated samples.	RNA-seq	Human	HT-1080 cells	Screened	Further study needed to confirm connection to ferroptosis.	_NA_	_NA_	24844246	Not found in HGNC. May inhibit ferroptosis.
Marker	EIF2S1	Eukaryotic translation initiation factor 2 subunit 1	HGNC:3265	Phosphorylated in erastin-treated sample.	Western blot	Human	HT-1080 cells	Deduced	_NA_	Eukaryotic translation initiation factor 2 subunit 1	P05198 (IF2A_HUMAN)	24844246	eIF2alpha in article. May promote ferroptosis.
Marker	KIM-1	Kidney injury molecule-1	_NA_	Down-regulated upon Fer-1 appearance	Real-time quantitative RT-PCR	Mice	Fer-1–treated CaOx model	Deduced	_NA_	_NA_	_NA_	25385600	Not found in HGNC. May promote ferroptosis.
Marker	IL6	Interleukin 6	HGNC:6018	Down-regulated upon Fer-1 appearance	Real-time quantitative RT-PCR	Mice	Fer-1–treated CaOx model	Deduced	_NA_	Interleukin-6	P05231 (IL6_HUMAN)	25385600	IL-6 in article. May promote ferroptosis.
Marker	CXCL2	C-X-C motif chemokine ligand 2	HGNC:4603	Down-regulated upon Fer-1 appearance	Real-time quantitative RT-PCR	Mice	Fer-1–treated CaOx model	Deduced	_NA_	C-X-C motif chemokine 2	P19875 (CXCL2_HUMAN)	25385600	May promote ferroptosis.
Marker	RELA	RELA proto-oncogene, NF-kB subunit	HGNC:9955	Down-regulated upon Fer-1 appearance	Real-time quantitative RT-PCR	Mice	Fer-1–treated CaOx model	Deduced	_NA_	Transcription factor p65	Q04206 (TF65_HUMAN)	25385600	p65 in article. May promote ferroptosis.
Marker	HSD17B11	Hydroxysteroid 17-beta dehydrogenase 11	HGNC:22960	Enriched in RSL3-resistant cells.	Gene trap insertion	Human	Chronic myeloid leukemia cell line KBM7	Screened	_NA_	Estradiol 17-beta-dehydrogenase 11	Q8NBQ5 (DHB11_HUMAN)	25965523	May promote ferroptosis.
Marker	AGPAT3	1-acylglycerol-3-phosphate O-acyltransferase 3	HGNC:326	Enriched in RSL3-resistant cells.	Gene trap insertion	Human	Chronic myeloid leukemia cell line KBM7	Screened	_NA_	1-acyl-sn-glycerol-3-phosphate acyltransferase gamma	Q9NRZ7 (PLCC_HUMAN)	25965523	May promote ferroptosis.
Marker	SETD1B	SET domain containing 1B, histone lysine methyltransferase	HGNC:29187	Enriched in GPX4 inhibitor ML162-resistant cells.	Gene trap insertion	Human	Chronic myeloid leukemia cell line KBM7	Screened	_NA_	Histone-lysine N-methyltransferase SETD1B	Q9UPS6 (SET1B_HUMAN)	25965523	May promote ferroptosis.
Marker	HMOX1	Heme oxygenase 1	HGNC:5013	Its expression increased in response to artesunate-induced ferroptosis, indicating activation of ROS-mediated signaling pathways.	Western blotting	Human	Pancreatic adenocarcinoma cell line Panc-1 cells	Deduced	_NA_	Heme oxygenase 1	P09601 (HMOX1_HUMAN)	26097885	HO-1 in article. May promote ferroptosis.
Marker	TF	Transferrin	HGNC:11740	Its expression is decreased in patients.	Gene expression analysis	Human	Patient PDAC tissues	Deduced	_NA_	Serotransferrin	P02787 (TRFE_HUMAN)	26097885	May promote ferroptosis.
Marker	FTL	Ferritin light chain	HGNC:3999	Its expression is decreased in patients.	Gene expression analysis	Human	Patient PDAC tissues	Deduced	_NA_	Ferritin light chain	P02792 (FRIL_HUMAN)	26097885	May promote ferroptosis.
Marker	RPL8	Ribosomal protein L8	HGNC:10368	Significantly reduced in tumor tissues	Gene expression analysis	Human	Patient PDAC tissues	Deduced	_NA_	60S ribosomal protein L8	P62917 (RL8_HUMAN)	26097885	May promote ferroptosis.
Marker	ATP5MC3	ATP synthase membrane subunit c locus 3	HGNC:843	Significantly reduced in tumor tissues	Gene expression analysis	Human	Patient PDAC tissues	Deduced	_NA_	ATP synthase F(0) complex subunit C3	P48201 (AT5G3_HUMAN)	26097885	ATP5G3 in article. May promote ferroptosis.
Marker	TFRC	Transferrin receptor	HGNC:11763	Expression of this gene is increased in patients.	Gene expression analysis	Human	Patient PDAC tissues	Deduced	_NA_	Transferrin receptor protein 1	P02786 (TFR1_HUMAN)	26097885	May inhibit ferroptosis.
Marker	MAFG	MAF bZIP transcription factor G	HGNC:6781	The interaction between NRF2 and MafG was increased in response to erastin and sorafenib.	Western blot	Human, mice	HepG2, Hepa1‐6, Hep3B, and SNU‐182 cells	Deduced	_NA_	Transcription factor MafG	O15525 (MAFG_HUMAN)	26403645	May inhibit ferroptosis.
Marker	IL33	Interleukin 33	HGNC:16028	IL-33 upregulation is a feature of ferroptosis. Ferrostatin-1, an inhibitor of ferroptosis, prevented the upregulation of IL-33.	Western blot, quantitative PCR, ELISA	Mice	C57BL/6 mice	Deduced	_NA_	Interleukin-33	O95760 (IL33_HUMAN)	27352622	IL-33 in article. May promote ferroptosis.
Marker	FTH1	Ferritin heavy chain 1	HGNC:3976	An increase of endogenous FTH1 level during ferroptosis. Degradation of FTH1 protein upon ferroptosis induction.	Immunoblotting, q-PCR	Human	HT1080 cells	Validated	An error may exist in the original article, where the authors wrote "ferritin light chain 1 (FTH1)". According to HGNC, FTH1 is the official symbol for "ferritin heavy chain 1".	Ferritin heavy chain	P02794 (FRIH_HUMAN)	27514700	_NA_
Marker	SLC40A1	Solute carrier family 40 member 1	HGNC:10909	Erastin-induced mRNA expression is upregulated in FANCD2-deficient cells.	Q-PCR	Mice	Bone marrow stromal cells	Validated	Used as a marker in this study but has been proved to be a suppressor (PMID 27441659).	Solute carrier family 40 member 1	Q9NP59 (S40A1_HUMAN)	27773819	May promote ferroptosis.
Marker	TF	Transferrin	HGNC:11740	Erastin-induced mRNA expression is upregulated in FANCD2-deficient cells.	Q-PCR	Mice	Bone marrow stromal cells	Validated	Used as a marker in this study but has been proved to be a driver (PMID 27441659).	Serotransferrin	P02787 (TRFE_HUMAN)	27773819	May promote ferroptosis.
Marker	TFRC	Transferrin receptor	HGNC:11763	Erastin-induced mRNA expression is upregulated in FANCD2-deficient cells.	Q-PCR	Mice	Bone marrow stromal cells	Validated	Used as a marker in this study but has been proved to be a driver (PMID 27514700).	Transferrin receptor protein 1	P02786 (TFR1_HUMAN)	27773819	May promote ferroptosis.
Marker	FTH1	Ferritin heavy chain 1	HGNC:3976	Erastin-induced mRNA expression is downregulated in FANCD2-deficient cells.	Q-PCR, western blot	Mice	Bone marrow stromal cells	Validated	Used as a marker in this study but has been proved to be a suppressor (PMID 26403645).	Ferritin heavy chain	P02794 (FRIH_HUMAN)	27773819	May inhibit ferroptosis.
Marker	GPX4	Glutathione peroxidase 4	HGNC:4556	Erastin-induced mRNA expression is downregulated in FANCD2-deficient cells.	Q-PCR, western blot	Mice	Bone marrow stromal cells	Validated	Used as a marker in this study but has been proved to be a suppressor (PMID 25824823).	Phospholipid hydroperoxide glutathione peroxidase	P36969 (GPX4_HUMAN)	27773819	May inhibit ferroptosis.
Marker	HAMP	Hepcidin antimicrobial peptide	HGNC:15598	Erastin-induced mRNA expression is downregulated in FANCD2-deficient cells.	Q-PCR	Mice	Bone marrow stromal cells	Deduced	_NA_	Hepcidin	P81172 (HEPC_HUMAN)	27773819	May inhibit ferroptosis.
Marker	HSPB1	Heat shock protein family B (small) member 1	HGNC:5246	Erastin-induced mRNA expression is downregulated in FANCD2-deficient cells.	Q-PCR	Mice	Bone marrow stromal cells	Validated	Used as a marker in this study but has been proved to be a suppressor (PMID 25728673).	Heat shock protein beta-1	P04792 (HSPB1_HUMAN)	27773819	May inhibit ferroptosis.
Marker	NFE2L2	Nuclear factor, erythroid 2 like 2	HGNC:7782	Erastin-induced mRNA expression is downregulated in FANCD2-deficient cells.	Q-PCR	Mice	Bone marrow stromal cells	Validated	Used as a marker in this study but has been proved to be a suppressor (PMID 27015352).	Nuclear factor erythroid 2-related factor 2	Q16236 (NF2L2_HUMAN)	27773819	NRF2 in article. May inhibit ferroptosis.
Marker	STEAP3	STEAP3 metalloreductase	HGNC:24592	Erastin-induced mRNA expression is downregulated in FANCD2-deficient cells.	Q-PCR	Mice	Bone marrow stromal cells	Deduced	_NA_	Metalloreductase STEAP3	Q658P3 (STEA3_HUMAN)	27773819	May inhibit ferroptosis.
Marker	DRD5	Dopamine receptor D5	HGNC:3026	Ferroptotic erastin induces DRD5 gene expression in ferroptosis.	Western blot, Q-PCR	Human	PANC1 cells	Deduced	_NA_	D(1B) dopamine receptor	P21918 (DRD5_HUMAN)	27793671	May promote ferroptosis.
Marker	GPX4	Glutathione peroxidase 4	HGNC:4556	Erastin promoted GPX4 degradation. Antiferroptotic dopamine increased the protein stability of glutathione peroxidase 4.	Western blot, Q-PCR	Human	PANC1 cells	Deduced	Has been proved to be a suppressor (PMID 25824823).	Phospholipid hydroperoxide glutathione peroxidase	P36969 (GPX4_HUMAN)	27793671	May inhibit ferroptosis.
Marker	DRD4	Dopamine receptor D4	HGNC:3025	Antiferroptotic dopamine suppressed dopamine receptor D4 protein degradation. Ferroptotic erastin promotes DRD4 protein degradation.	Western blot, Q-PCR	Human	PANC1 cells	Deduced	_NA_	D(4) dopamine receptor	P21917 (DRD4_HUMAN)	27793671	May inhibit ferroptosis.
Marker	MAP3K5	Mitogen-activated protein kinase kinase kinase 5	HGNC:6857	Cold stress evokes ferroptosis, and the ASK1‐p38 pathway is activated downstream of lipid peroxide, leading to the cell death. ASK1‐p38 axis is also activated in the erastin‐induced ferroptosis model.	LDH assay, immunoblot, RNAi, CCK-8	Human	A549 cells	Deduced	_NA_	Mitogen-activated protein kinase kinase kinase 5	Q99683 (M3K5_HUMAN)	28887319	ASK1 in article. May promote ferroptosis.
Marker	MAPK14	Mitogen-activated protein kinase 14	HGNC:6876	Cold stress evokes ferroptosis, and the ASK1‐p38 pathway is activated downstream of lipid peroxide, leading to the cell death. ASK1‐p38 axis is also activated in the erastin‐induced ferroptosis model.	LDH assay, immunoblot, RNAi, CCK-8	Human	A549 cells	Deduced	_NA_	Mitogen-activated protein kinase 14	Q16539 (MK14_HUMAN)	28887319	p38 in article. May promote ferroptosis.
Marker	SLC2A1	Solute carrier family 2 member 1	HGNC:11005	Increased at LSH overexpression. Decreased at LSH knockdown. LSH can inhibit ferroptosis.	ChIP analysis, RT-qPCR	Human	H358, A549 cells	Deduced	_NA_	Solute carrier family 2	P11166 (GTR1_HUMAN)	28900510	GLUT1 in article. May inhibit ferroptosis.
Marker	SLC2A3	Solute carrier family 2 member 3	HGNC:11007	Decreased at LSH knockdown. LSH can inhibit ferroptosis.	RT-qPCR	Human	H358, A549 cells	Deduced	_NA_	Solute carrier family 2	P11169 (GTR3_HUMAN)	28900510	GLUT3 in article. May inhibit ferroptosis.
Marker	SLC2A6	Solute carrier family 2 member 6	HGNC:11011	Increased at LSH overexpression. Decreased at LSH knockdown. LSH can inhibit ferroptosis.	RT-qPCR	Human	H358, A549 cells	Deduced	_NA_	Solute carrier family 2	Q9UGQ3 (GTR6_HUMAN)	28900511	GLUT6 in article. May inhibit ferroptosis.
Marker	SLC2A8	Solute carrier family 2 member 8	HGNC:13812	Decreased at LSH knockdown. LSH can inhibit ferroptosis.	RT-qPCR	Human	H358, A549 cells	Deduced	_NA_	Solute carrier family 2	Q9NY64 (GTR8_HUMAN)	28900512	GLUT8 in article. May inhibit ferroptosis.
Marker	SLC2A12	Solute carrier family 2 member 12	HGNC:18067	Increased at LSH overexpression. Decreased at LSH knockdown. LSH can inhibit ferroptosis.	RT-qPCR	Human	H358, A549 cells	Deduced	_NA_	Solute carrier family 2	Q8TD20 (GTR12_HUMAN)	28900513	GLUT12 in article. May inhibit ferroptosis.
Marker	GLUT13	_NA_	_NA_	Increased at LSH overexpression. Decreased at LSH knockdown. LSH can inhibit ferroptosis.	RT-qPCR	Human	H358, A549 cells	Deduced	_NA_	_NA_	_NA_	28900514	Not found in HGNC. May inhibit ferroptosis.
Marker	SLC2A14	Solute carrier family 2 member 14	HGNC:18301	Decreased at LSH knockdown. LSH can inhibit ferroptosis.	RT-qPCR	Human	H358, A549 cells	Deduced	_NA_	Solute carrier family 2	Q8TDB8 (GTR14_HUMAN)	28900515	GLUT14 in article. May inhibit ferroptosis.
Marker	EIF2AK4	Eukaryotic translation initiation factor 2 alpha kinase 4	HGNC:19687	CHAC1 degradation of GSH enhances cystine-starvation-induced ferroptosis through the activated GCN2-eIF2 alpha-ATF4 pathway.	Western blot, real-time PCR, cell viability assay, siRNA, GSH assay kit	Human	MDA-MB-231, Hs 578T, and HCC 1937 cells	Deduced	_NA_	eIF-2-alpha kinase GCN2	Q9P2K8 (E2AK4_HUMAN)	29383104	GCN2 in article. May promote ferroptosis.
Marker	EIF2S1	Eukaryotic translation initiation factor 2 subunit alpha	HGNC:3265	CHAC1 degradation of GSH enhances cystine-starvation-induced ferroptosis through the activated GCN2-eIF2 alpha-ATF4 pathway.	Western blot, real-time PCR, cell viability assay, siRNA, GSH assay kit	Human	MDA-MB-231, Hs 578T, and HCC 1937 cells	Deduced	_NA_	Eukaryotic translation initiation factor 2 subunit 1	P05198 (IF2A_HUMAN)	29383104	eIF2alpha in article. May promote ferroptosis.
Marker	ATF4	Activating transcription factor 4	HGNC:786	CHAC1 degradation of GSH enhances cystine-starvation-induced ferroptosis through the activated GCN2-eIF2 alpha-ATF4 pathway.	Western blot, real-time PCR, cell viability assay, siRNA, GSH assay kit	Human	MDA-MB-231, Hs 578T, and HCC 1937 cells	Deduced	_NA_	Cyclic AMP-dependent transcription factor ATF-4	P18848 (ATF4_HUMAN)	29383104	May promote ferroptosis.
Marker	ALOX5	Arachidonate 5-lipoxygenase	HGNC:435	Overexpression sensitizes cells to ferroptosis.	Western blot, mass spectrometry, cell viability assay, gene overexpression	Human	HEK293 cells	Deduced	Not essential but may play a role in ferroptotis initiation.	Arachidonate 5-lipoxygenase	P09917 (LOX5_HUMAN)	29632885	5-LOX in article
Marker	ALOX12	Arachidonate 12-lipoxygenase, 12S type	HGNC:429	Overexpression sensitizes cells to ferroptosis.	Western blot, mass spectrometry, cell viability assay, gene overexpression	Human	HEK293 cells	Deduced	Not essential but may play a role in ferroptotis initiation.	Arachidonate 12-lipoxygenase	P18054 (LOX12_HUMAN)	29632885	p12-LOX in article
Marker	ALOX15	Arachidonate 15-lipoxygenase	HGNC:433	Overexpression sensitizes cells to ferroptosis.	Western blot, mass spectrometry, cell viability assay, gene overexpression	Human	HEK293 cells	Deduced	Not essential but may play a role in ferroptotis initiation.	Arachidonate 15-lipoxygenase	P16050 (LOX15_HUMAN)	29632885	15-LOX-1 in article
Marker	ALOX5	Arachidonate 5-lipoxygenase	HGNC:435	Necessary for hemin‐induced ferroptosis in vitro.	qRT-PCR, immunoblotting, MTT assay	Mice	C57BL/6 and pregnant CD1 mice, primary cortical neurons	Deduced	_NA_	Arachidonate 5-lipoxygenase	P09917 (LOX5_HUMAN)	30294906	May promote ferroptosis.
Marker	ACSF2	Acyl-CoA synthetase family member 2	HGNC:26101	Increased in ferroptotic events. Decreased in DFO-induced resistance to ferroptosis.	Western blot, glutathione detection, RT-qPCR, immunofluorescence staining	Rat	Wistar rats	Deduced	_NA_	Medium-chain acyl-CoA ligase ACSF2	Q96CM8 (ACSF2_HUMAN)	30539824	There is a corrigendum for this article. May promote ferroptosis.
Marker	IREB2	Iron responsive element binding protein 2	HGNC:6115	Increased in ferroptotic events. Decreased in DFO-induced resistance to ferroptosis.	Western blot, glutathione detection, RT-qPCR, immunofluorescence staining	Rat	Wistar rats	Deduced	_NA_	Iron-responsive element-binding protein 2	P48200 (IREB2_HUMAN)	30539824	There is a corrigendum for this article. May promote ferroptosis.
Marker	GPX4	Glutathione peroxidase 4	HGNC:4556	Upregulated in DFO-induced resistance to ferroptosis.	Western blot, glutathione detection, RT-qPCR, immunofluorescence staining	Rat	Wistar rats	Validated	Inhibits ferroptosis but used as a marker in this study.	Phospholipid hydroperoxide glutathione peroxidase	P36969 (GPX4_HUMAN)	30539824	There is a corrigendum for this article.
Marker	HMGB1	High mobility group box 1	HGNC:4983	Associated with ferroptotic cell death. Ferroptosis activators induce HMGB1 release.	ELISA, western blot, RNAi	Human, mice	HT1080 and PANC1 cells, mouse embryonic fibroblasts	Deduced	_NA_	High mobility group protein B1	P09429 (HMGB1_HUMAN)	30686534	May promote ferroptosis.
Marker	HMOX1	Heme oxygenase 1	HGNC:5013	Required for DOX-induced ferroptosis.	RNA-seq, qRT-PCR, HIS	Mice	Mice	Deduced	_NA_	Heme oxygenase 1	P09601 (HMOX1_HUMAN)	30692261	May promote ferroptosis.
Marker	NFE2L2	Nuclear factor, erythroid 2 like 2	HGNC:7782	DOX treatment induced ferroptosis. Protein and mRNA levels of Nrf2 were increased after DOX treatment.	RNA-seq, QuantiChrom Heme Assay Kit, iron staining, qRT-PCR, survival curve, HIS	Mice	Mice	Deduced	_NA_	Nuclear factor erythroid 2-related factor 2	Q16236 (NF2L2_HUMAN)	30692261	NRF2 in article.
Marker	ELAVL1	ELAV like RNA binding protein 1	HGNC:3312	Binds to and increases the expression of the negative ferroptosis regulator LINC00336.	RNA pulldown, mass spectrometry, qRT-PCR, gene overexpression, gene knockdown, western blot	Human	H358, PC9, SPC-A-1, and A549 cells	Deduced	_NA_	ELAV-like protein 1	Q15717 (ELAV1_HUMAN)	30787392	May inhibit ferroptosis.
Marker	SLC3A2	Solute carrier family 3 member 2	HGNC:11026	Strongly correlated with resistance to ferroptosis inducers.	Western blot, cell viability assay, cell viability assay, MDA assay, glutamate assay	Human	HT-1080 cells	Deduced	_NA_	4F2 cell-surface antigen heavy chain	P08195 (4F2_HUMAN)	31043744	May inhibit ferroptosis.
Marker	SLC7A11	Solute carrier family 7 member 11	HGNC:11059	Strongly correlated with resistance to ferroptosis inducers.	Western blot, cell viability assay, cell viability assay, MDA assay, glutamate assay	Human	HT-1080 cells	Deduced	_NA_	Cystine/glutamate transporter	Q9UPY5 (XCT_HUMAN)	31043744	May inhibit ferroptosis.
Marker	TFAP2C	Transcription factor AP-2 gamma	HGNC:11744	Activated by ferroptosis inhibitor selenium.	Behavioral analysis, infarct volume analysis, immunocytochemistry, TUNEL staining, fluoro-jade Staining, qRT-PCR, cell death assay, ChIP assay, siRNA, western blot, immunoblotting, RNA-seq, mass spectrometry	Mice	C57BL/6 mice, primary cortical neurons, HT22 murine hippocampal cells	Deduced	_NA_	Transcription factor AP-2 gamma	Q92754 (AP2C_HUMAN)	31056284	May inhibit ferroptosis.
Marker	SP1	Sp1 transcription factor	HGNC:11205	Activated by ferroptosis inhibitor selenium.	Behavioral analysis, infarct volume analysis, immunocytochemistry, TUNEL staining, fluoro-jade Staining, qRT-PCR, cell death assay, ChIP assay, siRNA, western blot, immunoblotting, RNA-seq, mass spectrometry	Mice	C57BL/6 mice, primary cortical neurons, HT22 murine hippocampal cells	Deduced	_NA_	Transcription factor Sp1	P08047 (SP1_HUMAN)	31056284	May inhibit ferroptosis.
Marker	HBA1	Hemoglobin subunit alpha 1	HGNC:4823	Upregulated in cells treated with ferroptosis inducer erastin. Stimulates ferroptosis possibly in a GSH-dependent manner.	Tandem mass tags, RNA-seq, DNase-seq, qPCR, Western blot, IHC	Human	HepG2, Bel-7402 cells	Deduced	_NA_	Hemoglobin subunit alpha	P69905 (HBA_HUMAN)	31108460	May promote ferroptosis.
Marker	NNMT	Nicotinamide N-methyltransferase	HGNC:7861	Upregulated in cells treated with ferroptosis inducer erastin. Stimulates ferroptosis possibly in a GSH-dependent manner.	Tandem mass tags, RNA-seq, DNase-seq, qPCR, Western blot, IHC	Human	HepG2, Bel-7402 cells	Deduced	_NA_	Nicotinamide N-methyltransferase	P40261 (NNMT_HUMAN)	31108460	May promote ferroptosis.
Marker	PLIN4	Perilipin 4	HGNC:29393	Upregulated in cells treated with ferroptosis inducer erastin. Stimulates ferroptosis possibly in a GSH-dependent manner.	Tandem mass tags, RNA-seq, DNase-seq, qPCR, Western blot, IHC	Human	HepG2, Bel-7402 cells	Deduced	_NA_	Perilipin-4	Q96Q06 (PLIN4_HUMAN)	31108460	May promote ferroptosis.
Marker	HIC1	HIC ZBTB transcriptional repressor 1	HGNC:4909	Essential for stimulation of pro-ferroptotic gene transcription upon ferroptosis induction.	Immunohistochemistry, immunofluorescence, western blot, qPCR, metabolites examination, ChIP	Human	HepG2, Bel-7402 cells	Deduced	_NA_	Hypermethylated in cancer 1 protein	Q14526 (HIC1_HUMAN)	31108460	May promote ferroptosis.
Marker	STMN1	Stathmin 1	HGNC:6510	Downregulated in cells treated with ferroptosis inducer erastin. Suppresses ferroptosis possibly in a GSH-dependent manner.	Tandem mass tags, RNA-seq, DNase-seq, qPCR, Western blot, IHC	Human	HepG2, Bel-7402 cells	Deduced	_NA_	Stathmin	P16949 (STMN1_HUMAN)	31108460	May inhibit ferroptosis.
Marker	RRM2	Ribonucleotide reductase regulatory subunit M2	HGNC:10452	Downregulated in cells treated with ferroptosis inducer erastin. Suppresses ferroptosis possibly in a GSH-dependent manner.	Tandem mass tags, RNA-seq, DNase-seq, qPCR, Western blot, IHC	Human	HepG2, Bel-7402 cells	Deduced	_NA_	Ribonucleoside-diphosphate reductase subunit M2	P31350 (RIR2_HUMAN)	31108460	May inhibit ferroptosis.
Marker	CAPG	Capping actin protein, gelsolin like	HGNC:1474	Downregulated in cells treated with ferroptosis inducer erastin. Suppresses ferroptosis possibly in a GSH-dependent manner.	Tandem mass tags, RNA-seq, DNase-seq, qPCR, Western blot, IHC	Human	HepG2, Bel-7402 cells	Deduced	_NA_	Macrophage-capping protein	P40121 (CAPG_HUMAN)	31108460	May inhibit ferroptosis.
Marker	HNF4A	Hepatocyte nuclear factor 4 alpha	HGNC:5024	Essential for stimulation of anti-ferroptotic gene transcription.	Immunohistochemistry, immunofluorescence, western blot, qPCR, metabolites examination, ChIP	Human	HepG2, Bel-7402 cells	Deduced	_NA_	Hepatocyte nuclear factor 4-alpha	P41235 (HNF4A_HUMAN)	31108460	May inhibit ferroptosis.
Marker	NGB	Neuroglobin	HGNC:14077	Human neuroglobin (hNgb)-EGFP-expressing SH-SY5Y cells to be significantly more resistant to ferroptosis induction.	Cell death, cell viability, lipid peroxidation assay, RT-qPCR	Human	SH-SY5Y cells	Deduced	_NA_	Neuroglobin	Q9NPG2 (NGB_HUMAN)	31405213	May inhibit ferroptosis.
Marker	YWHAE	Tyrosine 3-monooxygenase/tryptophan 5-monooxygenase activation protein epsilon	HGNC:12851	Required by RSL3 (a ferroptosis inducer) to inactivate GPX4 (a ferroptosis inhibitor).	Mass spectrometry, siRNA, western blot	Human	HEK293T cells	Deduced	_NA_	14-3-3 protein epsilon	P62258 (1433E_HUMAN)	31581313	14-3-3epsilon in article. May promote ferroptosis.
Marker	GABPB1	GA binding protein transcription factor subunit beta 1	HGNC:4074	Downregulated by lncRNA GABPB1-AS1 upon erastin treatment.	RT-qPCR, western blot, siRNA, cell viability, lipid peroxidation assay	Human	HepG2, Huh7, and Hep3B cells	Deduced	_NA_	GA-binding protein subunit beta-1	Q06547 (GABP1_HUMAN)	31700067	May inhibit ferroptosis.
Marker	AURKA	Aurora kinase A	HGNC:11393	Inhibition of AURKA or reconstitution of miR-4715-3p inhibited GPX4 and induced cell death, suggesting a link between AURKA and ferroptosis.	qRT-PCR, western blot, lentiviral infection, CellTiter-Glo luminescence assay	Human	OE33, STKM2, MKN45 cells	Predicted	_NA_	Aurora kinase A	O14965 (AURKA_HUMAN)	31740746	May inhibit ferroptosis.
Marker	MIR4715	microRNA 4715	HGNC:41666	Inhibition of AURKA or reconstitution of miR-4715-3p inhibited GPX4 and induced cell death, suggesting a link between AURKA and ferroptosis.	qRT-PCR, western blot, lentiviral infection, CellTiter-Glo luminescence assay	Human	OE33, STKM2, MKN45 cells	Predicted	_NA_	_NA_	_NA_	31740746	miR-4715-3p in article. May promote ferroptosis.
Marker	RIPK1	Receptor interacting serine/threonine kinase 1	HGNC:10019	Reduced expression results in resistance to ferroptosis.	Cell viability, western blot, RNA-seq, GSH assay, qRT-PCR, immunofluorescence imaging	Human	Patient-derived fibroblasts	Deduced	_NA_	Receptor-interacting serine/threonine-protein kinase 1	Q13546 (RIPK1_HUMAN)	31827280	May promote ferroptosis.
Marker	PRDX1	Peroxiredoxin 1	HGNC:9352	Necessary to ferroptosis-related lipid peroxidation.	Western blot, siRNA, flow cytometry, cell viability, RT-PCR	Human	Primary corneal endothelial cells, B4G12 and HT1080 cells	Deduced	_NA_	Peroxiredoxin-1	Q06830 (PRDX1_HUMAN)	31901729	May promote ferroptosis.
Marker	MIR30B	microRNA 30b	HGNC:31625	Upregulation of miR-30b-5p in preeclampsia models plays a pivotal role in ferroptosis.	GSH assay, MDA measurement, western blot, immunohistochemistry, microarray, RT-qPCR, labile iron assay, cell viability, LDH assay	Human, rat	Trophoblasts, preeclampsia model, HTR-8/SVneo and TEV-1 cells	Deduced	_NA_	_NA_	_NA_	31926626	miR-30b-5p in article. May promote ferroptosis.

## Sheet: Table S2
Table S2. Differentially expressed genes among gastric cancer tissues.
ID	baseMean	log2FoldChange	lfcSE	stat	pvalue	padj
ENSG00000213401.7	428.461	9.2777	0.798894	11.6132	3.53195e-31	8.06394e-29
ENSG00000147381.10	525.919	8.94398	0.955826	9.35733	8.17754e-21	3.823e-19
ENSG00000197172.9	576.151	8.86884	0.807685	10.9806	4.73918e-28	6.74303e-26
ENSG00000221867.7	813.801	8.65534	0.767013	11.2845	1.56571e-29	2.82042e-27
ENSG00000123407.3	357.663	8.48389	0.742549	11.4254	3.12347e-30	6.13292e-28
ENSG00000126890.13	130.628	8.24955	1.05147	7.84575	4.30366e-15	8.12522e-14
ENSG00000198681.6	154.682	7.52095	0.930029	8.08679	6.12576e-16	1.32759e-14
ENSG00000046774.9	69.3459	7.50911	1.04726	7.17021	7.48813e-13	9.53498e-12
ENSG00000170373.7	3752.04	6.99499	0.391253	17.8784	1.73597e-71	1.13619e-67
ENSG00000198054.10	81.6363	6.93548	0.896092	7.73969	9.96602e-15	1.76132e-13
ENSG00000123500.8	2491.01	6.90066	0.356104	19.3782	1.17903e-83	2.31502e-79
ENSG00000198930.11	409.734	6.83648	0.613177	11.1493	7.2195e-29	1.15248e-26
ENSG00000124260.10	108.538	6.81912	0.871341	7.82601	5.03609e-15	9.36398e-14
ENSG00000155495.8	31.5141	6.72327	0.932186	7.21236	5.49885e-13	7.16932e-12
ENSG00000163283.6	224.063	6.57277	0.526013	12.4954	7.90494e-36	4.08456e-33
ENSG00000029559.6	68.1023	6.56824	0.532031	12.3456	5.14541e-35	2.40548e-32
ENSG00000180818.4	943.499	6.50742	0.431585	15.078	2.26153e-51	8.88102e-48
ENSG00000185686.16	795.718	6.35737	0.507226	12.5336	4.88873e-36	2.6664e-33
ENSG00000162344.3	90.9104	6.25581	0.601665	10.3975	2.54521e-25	2.41426e-23
ENSG00000136881.10	380.885	6.23316	0.484615	12.8621	7.35655e-38	4.65954e-35
ENSG00000125207.6	352.23	6.17452	0.508351	12.1462	6.01218e-34	2.31469e-31
ENSG00000147246.8	33.6509	6.13412	0.759317	8.07847	6.55866e-16	1.41516e-14
ENSG00000159217.8	832.134	5.99436	0.54006	11.0994	1.26223e-28	1.92123e-26
ENSG00000198443.6	31.5855	5.92837	0.701186	8.45478	2.79618e-17	7.5004e-16
ENSG00000080511.3	36.8258	5.90938	0.57937	10.1997	1.98985e-24	1.63475e-22
ENSG00000060718.17	1557.53	5.82272	0.390881	14.8964	3.47673e-50	1.13776e-46
ENSG00000158874.10	242.537	5.80842	0.635967	9.13321	6.65005e-20	2.7374e-18
ENSG00000189052.6	24.99	5.79039	0.734906	7.87908	3.29793e-15	6.36099e-14
ENSG00000101441.4	50.7913	5.71869	0.506563	11.2892	1.48392e-29	2.69785e-27
ENSG00000181433.8	38.7308	5.62255	0.727581	7.72773	1.09481e-14	1.91463e-13
ENSG00000198842.8	341.313	5.55798	0.613549	9.05874	1.31962e-19	5.24507e-18
ENSG00000184029.8	21.3072	5.48349	0.880974	6.22435	4.83552e-10	3.86114e-09
ENSG00000184697.6	288.707	5.47634	0.582468	9.40194	5.35638e-21	2.58409e-19
ENSG00000163286.6	588.626	5.41964	0.519862	10.4252	1.9035e-25	1.84114e-23
ENSG00000164651.15	69.5414	5.38886	0.560836	9.60862	7.35265e-22	4.03266e-20
ENSG00000185247.13	65.2921	5.37573	0.810576	6.63198	3.31218e-11	3.22592e-10
ENSG00000111700.11	153.342	5.32432	0.587316	9.06551	1.24018e-19	4.95944e-18
ENSG00000117148.7	113.919	5.28449	0.570562	9.26192	2.00794e-20	8.85977e-19
ENSG00000123364.4	171.779	5.2802	0.563834	9.36482	7.61775e-21	3.59554e-19
ENSG00000204019.4	236.787	5.2733	0.566836	9.30304	1.36482e-20	6.2033e-19
ENSG00000267978.4	35.6355	5.26437	0.952711	5.52567	3.28228e-08	1.90223e-07
ENSG00000204542.2	41.3043	5.25689	0.709395	7.41038	1.25936e-13	1.83303e-12
ENSG00000243709.1	529.621	5.08824	0.53736	9.46896	2.82634e-21	1.41209e-19
ENSG00000126752.7	19.9981	5.02915	0.838264	5.99948	1.97945e-09	1.42264e-08
ENSG00000187258.12	440.671	5.00258	0.524784	9.53264	1.53339e-21	7.84067e-20
ENSG00000106038.11	103.813	4.99056	0.530251	9.41168	4.88277e-21	2.3731e-19
ENSG00000101115.11	457.32	4.92837	0.364858	13.5076	1.4098e-41	1.38407e-38
ENSG00000128610.10	171.503	4.91667	0.426614	11.5249	9.88569e-31	2.06495e-28
ENSG00000149968.10	2388.72	4.8257	0.442734	10.8998	1.15532e-27	1.51231e-25
ENSG00000005073.5	271.968	4.79772	0.407402	11.7764	5.16706e-32	1.3898e-29
ENSG00000269586.6	10.7686	4.78211	1.10789	4.3164	1.58592e-05	5.70739e-05
ENSG00000170516.15	18.116	4.75708	0.889942	5.34539	9.02236e-08	4.87088e-07
ENSG00000123838.9	405.408	4.74188	0.427202	11.0998	1.25661e-28	1.92123e-26
ENSG00000187772.6	40.3626	4.70974	0.836733	5.62873	1.8154e-08	1.09779e-07
ENSG00000268940.4	16.6604	4.70287	1.07137	4.38957	1.13575e-05	4.19172e-05
ENSG00000197587.9	107.82	4.68835	0.396882	11.813	3.34591e-32	9.38527e-30
ENSG00000120054.10	24.0466	4.6734	0.701081	6.66599	2.6288e-11	2.61085e-10
ENSG00000100557.8	211.075	4.67127	0.47248	9.88669	4.75474e-23	3.10164e-21
ENSG00000164283.11	469.919	4.63334	0.258287	17.9388	5.87404e-72	5.76684e-68
ENSG00000169548.3	16.797	4.63275	0.619882	7.47361	7.80251e-14	1.17127e-12
ENSG00000146678.8	99.2768	4.5891	0.50137	9.15312	5.53105e-20	2.29603e-18
ENSG00000162006.8	54.8622	4.58019	0.49988	9.16259	5.06677e-20	2.12124e-18
ENSG00000123388.4	426.547	4.51439	0.343864	13.1284	2.26381e-39	1.5875e-36
ENSG00000165164.11	57.153	4.49281	0.48787	9.20903	3.29074e-20	1.41697e-18
ENSG00000268606.4	6.21141	4.4616	0.761406	5.85969	4.63723e-09	3.10757e-08
ENSG00000105989.7	413.429	4.45231	0.310338	14.3466	1.11865e-46	2.74558e-43
ENSG00000204710.2	81.3078	4.43261	0.4511	9.82622	8.68132e-23	5.44593e-21
ENSG00000182111.8	21.1333	4.40381	0.631693	6.97144	3.13711e-12	3.61698e-11
ENSG00000181143.14	1079.98	4.39573	0.503522	8.72996	2.5477e-18	8.33735e-17
ENSG00000127928.11	73.1833	4.3836	0.567213	7.72832	1.08974e-14	1.90875e-13
ENSG00000113249.11	139.647	4.35438	0.463569	9.39316	5.82277e-21	2.78854e-19
ENSG00000174015.8	20.3181	4.34589	0.564082	7.70435	1.3151e-14	2.25914e-13
ENSG00000137868.17	861.149	4.33338	0.353417	12.2614	1.46009e-34	6.23238e-32
ENSG00000180806.4	215.272	4.30718	0.326514	13.1914	9.83159e-40	7.14975e-37
ENSG00000124157.6	16.3525	4.28828	0.680073	6.30562	2.87035e-10	2.38691e-09
ENSG00000164400.5	45.8695	4.27223	0.433912	9.84584	7.14364e-23	4.55407e-21
ENSG00000128683.12	339.263	4.23263	0.362596	11.6731	1.74838e-31	4.29119e-29
ENSG00000212901.3	17.113	4.22599	0.868549	4.86558	1.14121e-06	5.09962e-06
ENSG00000128713.12	23.3792	4.19718	0.748889	5.60454	2.08813e-08	1.25192e-07
ENSG00000217236.1	8.88308	4.18676	0.885108	4.73023	2.2427e-06	9.47811e-06
ENSG00000084453.15	50.5625	4.16931	0.466695	8.9337	4.11992e-19	1.49252e-17
ENSG00000099953.8	5737.81	4.16351	0.306263	13.5946	4.31282e-42	4.70456e-39
ENSG00000273706.3	27.8769	4.13426	0.553531	7.46888	8.08816e-14	1.20677e-12
ENSG00000183091.18	1653.6	4.12057	0.369041	11.1656	6.00736e-29	9.6684e-27
ENSG00000167580.6	130.265	4.10769	0.53597	7.66404	1.80181e-14	3.03157e-13
ENSG00000169059.11	6.30716	4.10417	0.895157	4.58486	4.54296e-06	1.80752e-05
ENSG00000131050.9	30.7551	4.09565	0.571816	7.16254	7.91953e-13	1.00258e-11
ENSG00000149948.12	1241.86	4.07473	0.356443	11.4316	2.90542e-30	5.76242e-28
ENSG00000095752.5	399.73	4.06311	0.374835	10.8397	2.23129e-27	2.73515e-25
ENSG00000164778.4	121.29	4.04311	0.527775	7.66068	1.84948e-14	3.10646e-13
ENSG00000132693.11	10.3975	4.04175	0.690131	5.8565	4.72725e-09	3.1625e-08
ENSG00000134538.2	13.4954	4.03949	0.629851	6.41341	1.42302e-10	1.25016e-09
ENSG00000007952.16	576.318	4.03651	0.407339	9.90945	3.78707e-23	2.51213e-21
ENSG00000108244.15	1486.21	3.99105	0.474567	8.40987	4.10473e-17	1.07893e-15
ENSG00000234068.5	9.64871	3.97883	0.99098	4.01504	5.9435e-05	0.000190532
ENSG00000134365.11	8.13722	3.96288	0.679314	5.83364	5.42312e-09	3.59012e-08
ENSG00000181355.19	14.9715	3.95549	0.551629	7.17057	7.46845e-13	9.51609e-12
ENSG00000166049.10	14.203	3.9489	0.999082	3.95253	7.73304e-05	0.000242825
ENSG00000125788.5	6.03861	3.94634	0.840337	4.69614	2.6513e-06	1.1027e-05
ENSG00000133063.14	522.41	3.92417	0.435188	9.01718	1.92993e-19	7.4595e-18
ENSG00000137673.7	6978.01	3.91723	0.432622	9.05461	1.37051e-19	5.42538e-18
ENSG00000171487.13	8.8978	3.87276	0.650059	5.95755	2.56045e-09	1.80518e-08
ENSG00000118113.10	23.6887	3.84777	0.462517	8.31921	8.85548e-17	2.17619e-15
ENSG00000178776.4	34.2601	3.84518	0.477562	8.05167	8.16701e-16	1.73549e-14
ENSG00000165643.9	12.0128	3.83856	0.773147	4.96485	6.8756e-07	3.19381e-06
ENSG00000083782.6	47.6288	3.81673	0.520759	7.32917	2.31588e-13	3.22977e-12
ENSG00000185231.4	5.52824	3.80944	0.531111	7.17257	7.36016e-13	9.3903e-12
ENSG00000068985.4	20.23	3.80705	0.66939	5.68734	1.29035e-08	8.02537e-08
ENSG00000137745.10	99.35	3.80396	0.392805	9.68409	3.52331e-22	2.04071e-20
ENSG00000037965.5	166.134	3.78782	0.327802	11.5552	6.94986e-31	1.48327e-28
ENSG00000139800.8	230.249	3.78419	0.47646	7.94231	1.98442e-15	4.00454e-14
ENSG00000196748.8	7.68312	3.78379	0.604352	6.26091	3.82743e-10	3.11058e-09
ENSG00000118785.12	10103.9	3.78251	0.356465	10.6112	2.64445e-26	2.83737e-24
ENSG00000183305.12	3.87392	3.77486	0.762422	4.95114	7.37783e-07	3.40695e-06
ENSG00000007350.15	116.852	3.7646	0.520481	7.23293	4.72689e-13	6.24999e-12
ENSG00000128714.5	50.8519	3.72696	0.809039	4.60665	4.09199e-06	1.64341e-05
ENSG00000181577.14	874.135	3.7242	0.367583	10.1316	4.00131e-24	3.14263e-22
ENSG00000182583.11	6.87102	3.7237	0.620576	6.00039	1.96838e-09	1.41676e-08
ENSG00000198883.10	59.0219	3.70868	0.569055	6.51726	7.16028e-11	6.65998e-10
ENSG00000176566.4	6.56083	3.70782	0.912546	4.06316	4.84123e-05	0.000158561
ENSG00000237412.5	13.5865	3.70532	0.678126	5.46406	4.65372e-08	2.63634e-07
ENSG00000078399.14	248.633	3.69745	0.400748	9.22637	2.79949e-20	1.21075e-18
ENSG00000172551.9	19.9281	3.69114	0.569196	6.48482	8.88392e-11	8.1322e-10
ENSG00000197110.7	4.41875	3.68817	0.644166	5.7255	1.03131e-08	6.52586e-08
ENSG00000103888.14	4838.13	3.68709	0.327107	11.2718	1.80832e-29	3.19877e-27
ENSG00000101197.11	59.1473	3.68646	0.372571	9.89464	4.39187e-23	2.87448e-21
ENSG00000206557.5	44.5076	3.66809	0.513716	7.14031	9.31229e-13	1.16537e-11
ENSG00000167612.11	16.8344	3.66599	0.564062	6.49928	8.07072e-11	7.44333e-10
ENSG00000108688.10	29.6558	3.66404	0.435579	8.4119	4.03428e-17	1.06184e-15
ENSG00000164935.5	43.4948	3.66014	0.34377	10.647	1.79992e-26	1.97438e-24
ENSG00000160161.8	329.967	3.65316	0.35635	10.2516	1.16364e-24	9.89095e-23
ENSG00000171102.13	10.5639	3.65105	0.640286	5.70222	1.18256e-08	7.39004e-08
ENSG00000148848.13	1315.32	3.62249	0.273211	13.259	4.00438e-40	3.14504e-37
ENSG00000253293.4	883.544	3.62237	0.332559	10.8924	1.25244e-27	1.61787e-25
ENSG00000136352.16	22.0594	3.61144	0.768843	4.69724	2.63705e-06	1.09817e-05
ENSG00000228836.7	3.0125	3.60666	1.35944	2.65305	0.00797687	0.0162055
ENSG00000189064.8	4.4759	3.60389	1.29916	2.774	0.0055371	0.0116816
ENSG00000173612.8	5.10213	3.59525	0.79532	4.52051	6.1691e-06	2.39803e-05
ENSG00000122133.15	49.4852	3.58028	0.468582	7.64066	2.16114e-14	3.58698e-13
ENSG00000166415.13	1650.89	3.57793	0.374092	9.56432	1.12944e-21	5.97752e-20
ENSG00000157766.14	787.044	3.56861	0.250007	14.274	3.17736e-46	5.67159e-43
ENSG00000160973.7	88.7576	3.5654	0.377821	9.43676	3.84488e-21	1.87879e-19
ENSG00000130720.11	414.697	3.55826	0.452751	7.8592	3.86585e-15	7.36236e-14
ENSG00000204365.4	6.86458	3.55475	0.713104	4.98489	6.1997e-07	2.90736e-06
ENSG00000005981.11	139.278	3.54408	0.564385	6.27954	3.39577e-10	2.79096e-09
ENSG00000182459.4	8.73225	3.54042	0.531045	6.6669	2.61258e-11	2.59736e-10
ENSG00000075891.20	25.3262	3.52908	0.531926	6.63454	3.25508e-11	3.17504e-10
ENSG00000177504.10	2.85451	3.5281	1.29548	2.7234	0.00646142	0.013407
ENSG00000268964.1	8.50667	3.5099	0.634582	5.53104	3.1833e-08	1.84924e-07
ENSG00000123584.7	6.20666	3.50495	0.998905	3.50879	0.000450146	0.0012141
ENSG00000279508.1	64.5452	3.50289	0.347467	10.0812	6.68772e-24	5.03117e-22
ENSG00000138083.4	76.1488	3.48285	0.485472	7.17414	7.27645e-13	9.30769e-12
ENSG00000163631.15	425.345	3.48024	0.606852	5.7349	9.75699e-09	6.18994e-08
ENSG00000073067.12	2248.49	3.47703	0.470456	7.39077	1.45979e-13	2.09372e-12
ENSG00000166670.8	283.045	3.47041	0.370764	9.36016	7.96183e-21	3.74894e-19
ENSG00000196335.11	379.257	3.46803	0.324338	10.6926	1.10179e-26	1.22224e-24
ENSG00000124875.8	554.128	3.46135	0.404259	8.5622	1.1073e-17	3.19732e-16
ENSG00000145192.11	29.9751	3.45722	0.599522	5.76662	8.08788e-09	5.21358e-08
ENSG00000124237.5	5.06502	3.4494	0.656881	5.25118	1.51127e-07	7.85854e-07
ENSG00000183709.7	4.90525	3.44504	0.587901	5.8599	4.63139e-09	3.10578e-08
ENSG00000163530.4	8.22427	3.43406	0.74629	4.60152	4.19428e-06	1.67968e-05
ENSG00000154252.11	182.257	3.43171	0.392626	8.74038	2.32317e-18	7.64079e-17
ENSG00000169067.3	34.4522	3.42936	0.412125	8.32116	8.71088e-17	2.14334e-15
ENSG00000261949.4	14.4504	3.42862	0.563607	6.08335	1.17697e-09	8.80036e-09
ENSG00000126583.9	341.593	3.42578	0.370433	9.24803	2.28659e-20	9.99939e-19
ENSG00000105664.9	1091.63	3.42238	0.398573	8.58657	8.96026e-18	2.64564e-16
ENSG00000204866.7	94.6106	3.42151	0.389958	8.77404	1.72368e-18	5.78537e-17
ENSG00000198183.10	12.3998	3.42093	0.79329	4.31233	1.6154e-05	5.79968e-05
ENSG00000166897.13	284.496	3.41154	0.388678	8.77728	1.67481e-18	5.63096e-17
ENSG00000165606.7	57.8614	3.40681	0.51292	6.64198	3.09494e-11	3.03239e-10
ENSG00000257138.1	12.5622	3.4038	0.461995	7.36761	1.73721e-13	2.45749e-12
ENSG00000146857.3	10.5988	3.39975	0.704448	4.82612	1.3922e-06	6.10176e-06
ENSG00000129991.11	92.0065	3.39848	0.403275	8.42719	3.54056e-17	9.38176e-16
ENSG00000183128.7	31.2056	3.39199	0.4908	6.91114	4.80771e-12	5.39117e-11
ENSG00000164932.11	2406.93	3.39175	0.241205	14.0617	6.53059e-45	9.8637e-42
ENSG00000043355.9	466.833	3.39046	0.453895	7.46971	8.0374e-14	1.20011e-12
ENSG00000170178.6	4.74754	3.3903	0.637355	5.31932	1.04156e-07	5.56341e-07
ENSG00000007038.9	733.177	3.38955	0.449624	7.53863	4.74938e-14	7.44841e-13
ENSG00000140835.9	229.303	3.38952	0.426345	7.95017	1.86249e-15	3.79752e-14
ENSG00000146049.1	7.76878	3.38233	0.526226	6.42753	1.29692e-10	1.14707e-09
ENSG00000147081.13	5.5899	3.37457	0.605471	5.57345	2.49737e-08	1.47743e-07
ENSG00000186790.5	25.149	3.36963	0.391437	8.60837	7.41076e-18	2.23518e-16
ENSG00000047936.9	85.0751	3.35908	0.440586	7.62412	2.45695e-14	4.03363e-13
ENSG00000183206.15	5.65592	3.35465	0.665752	5.03888	4.68254e-07	2.25126e-06
ENSG00000133115.10	12.6029	3.35366	0.517385	6.48194	9.05518e-11	8.27612e-10
ENSG00000168065.14	37.5225	3.35321	0.481807	6.95966	3.41104e-12	3.91443e-11
ENSG00000006377.10	109.269	3.34152	0.476041	7.01939	2.22841e-12	2.63584e-11
ENSG00000205777.16	3.31264	3.33608	0.967934	3.44659	0.000567702	0.00150126
ENSG00000170369.3	239.934	3.33351	0.368865	9.0372	1.60729e-19	6.28667e-18
ENSG00000122641.9	3774.66	3.32759	0.241896	13.7563	4.67083e-43	6.11412e-40
ENSG00000124657.1	16.6427	3.29283	0.423246	7.77994	7.25615e-15	1.32043e-13
ENSG00000135480.13	10123	3.28144	0.386611	8.4877	2.10765e-17	5.79604e-16
ENSG00000152670.17	13.6646	3.26743	0.560203	5.83258	5.45779e-09	3.6082e-08
ENSG00000131203.11	3105.84	3.25779	0.405077	8.0424	8.80984e-16	1.86805e-14
ENSG00000111981.4	69.6309	3.25219	0.34646	9.38691	6.1785e-21	2.94453e-19
ENSG00000257046.4	2.64868	3.23867	0.753883	4.29598	1.73923e-05	6.19892e-05
ENSG00000173157.15	23.6813	3.23203	0.606631	5.32784	9.93899e-08	5.3364e-07
ENSG00000123569.8	2.63671	3.21918	0.849985	3.78734	0.00015227	0.000451088
ENSG00000106031.7	1411.52	3.21429	0.390512	8.23096	1.85714e-16	4.35662e-15
ENSG00000144407.8	82.6887	3.21208	0.50541	6.35538	2.07906e-10	1.77411e-09
ENSG00000171759.7	100.72	3.2104	0.51116	6.28061	3.37237e-10	2.77404e-09
ENSG00000153779.9	2.26154	3.19948	0.968216	3.30451	0.000951416	0.00239439
ENSG00000214107.6	4.79955	3.19855	0.932719	3.42927	0.000605206	0.00159164
ENSG00000121075.8	52.914	3.19163	0.460402	6.93227	4.14136e-12	4.69246e-11
ENSG00000204869.7	60.9291	3.19105	0.432008	7.38657	1.50666e-13	2.15902e-12
ENSG00000169429.9	6122.66	3.18801	0.349699	9.11645	7.76269e-20	3.16225e-18
ENSG00000198062.13	2.6215	3.18758	0.797487	3.99703	6.41409e-05	0.000204549
ENSG00000129988.5	83.864	3.18389	0.44788	7.1088	1.17056e-12	1.44281e-11
ENSG00000102243.11	225.605	3.17947	0.554394	5.73504	9.74922e-09	6.18701e-08
ENSG00000164694.15	4242.54	3.17604	0.322978	9.83359	8.06875e-23	5.09421e-21
ENSG00000129654.7	766.68	3.17087	0.429349	7.3853	1.52116e-13	2.17696e-12
ENSG00000185269.10	1924.08	3.15017	0.52581	5.99109	2.08441e-09	1.49412e-08
ENSG00000100373.8	110.865	3.1499	0.46648	6.75249	1.45332e-11	1.49873e-10
ENSG00000102854.13	7756.26	3.13986	0.388225	8.08774	6.07804e-16	1.3187e-14
ENSG00000112238.11	7.28809	3.13821	0.73736	4.256	2.08115e-05	7.31927e-05
ENSG00000280130.1	7.10406	3.13299	0.686614	4.56296	5.04379e-06	1.99065e-05
ENSG00000104760.15	65.5011	3.12953	0.525491	5.95544	2.5937e-09	1.82666e-08
ENSG00000136231.12	854.935	3.12878	0.339587	9.21349	3.15697e-20	1.36236e-18
ENSG00000158816.14	79.4317	3.12261	0.496155	6.29361	3.10161e-10	2.56729e-09
ENSG00000104899.5	280.679	3.11846	0.334828	9.31363	1.23541e-20	5.66761e-19
ENSG00000239605.7	54.9774	3.11758	0.305762	10.1961	2.06374e-24	1.68839e-22
ENSG00000138435.13	68.5187	3.11471	0.280374	11.1091	1.13265e-28	1.75115e-26
ENSG00000138755.5	6818.66	3.11322	0.338189	9.20556	3.39891e-20	1.46034e-18
ENSG00000184571.12	13.0803	3.10984	0.540148	5.75739	8.54226e-09	5.48487e-08
ENSG00000187268.10	10.5955	3.09245	0.547015	5.65332	1.57374e-08	9.62629e-08
ENSG00000159763.3	7.05852	3.08936	0.643719	4.79925	1.59265e-06	6.92923e-06
ENSG00000128710.5	78.8461	3.08243	0.544262	5.66351	1.48309e-08	9.12622e-08
ENSG00000130829.16	83.1706	3.07182	0.477134	6.43806	1.21012e-10	1.07758e-09
ENSG00000140093.8	88.1264	3.0596	0.536557	5.70227	1.1822e-08	7.39004e-08
ENSG00000198398.2	2.37295	3.05552	0.874295	3.49485	0.000474335	0.00127368
ENSG00000257184.3	2.48761	3.05333	0.581609	5.24981	1.52258e-07	7.91314e-07
ENSG00000125571.8	11.5551	3.05276	0.425229	7.17909	7.01771e-13	8.9943e-12
ENSG00000183146.4	10.2613	3.05106	0.954205	3.19749	0.0013863	0.00336215
ENSG00000078579.8	40.2119	3.04376	0.552574	5.50833	3.62256e-08	2.08528e-07
ENSG00000165376.9	6083.27	3.0353	0.418192	7.25814	3.92443e-13	5.2598e-12
ENSG00000177238.12	124.072	3.03488	0.410868	7.38649	1.50752e-13	2.15902e-12
ENSG00000102313.8	22.5563	3.03386	0.448411	6.76579	1.32584e-11	1.37594e-10
ENSG00000148677.6	38.8845	3.02864	0.43407	6.97731	3.00884e-12	3.47739e-11
ENSG00000264424.1	14.8385	3.02686	0.552501	5.47847	4.29014e-08	2.44236e-07
ENSG00000106483.10	5361.05	3.02575	0.361326	8.37402	5.56862e-17	1.42062e-15
ENSG00000188624.2	7.04777	3.02332	0.581517	5.19902	2.00344e-07	1.02123e-06
ENSG00000151388.9	1809.21	3.0221	0.233889	12.9211	3.42229e-38	2.23989e-35
ENSG00000152592.12	12.2786	3.01888	0.471629	6.40096	1.54398e-10	1.34619e-09
ENSG00000167755.12	3456.01	3.01717	0.516444	5.8422	5.15153e-09	3.43115e-08
ENSG00000113889.10	22.4735	3.01496	0.427856	7.04667	1.83253e-12	2.19535e-11
ENSG00000186895.2	10.8033	3.01262	0.711344	4.23511	2.28441e-05	7.96279e-05
ENSG00000170279.2	2.7744	3.00931	0.780614	3.85505	0.000115707	0.000351415
ENSG00000165584.14	3.68582	3.00495	0.819914	3.66495	0.000247384	0.000702339
ENSG00000164761.7	891.57	2.9941	0.35245	8.4951	1.97765e-17	5.47165e-16
ENSG00000151224.11	115.658	2.99278	0.440046	6.80105	1.03858e-11	1.0952e-10
ENSG00000101074.3	24.9632	2.9871	0.401071	7.4478	9.49094e-14	1.39906e-12
ENSG00000189186.9	2.43066	2.98565	0.771201	3.87143	0.000108199	0.000329993
ENSG00000187730.7	153.221	2.97772	0.225698	13.1934	9.58002e-40	7.14975e-37
ENSG00000169551.11	5.83483	2.97571	0.653127	4.5561	5.21114e-06	2.05257e-05
ENSG00000186226.8	4.43632	2.97084	0.695936	4.26884	1.96496e-05	6.93795e-05
ENSG00000184330.10	15.9925	2.96135	0.738937	4.00758	6.13437e-05	0.000196362
ENSG00000186007.8	146.726	2.94634	0.328963	8.95645	3.35294e-19	1.23056e-17
ENSG00000197472.13	132.952	2.94633	0.242368	12.1564	5.30268e-34	2.08236e-31
ENSG00000173391.7	526.525	2.94289	0.264254	11.1366	8.3257e-29	1.3078e-26
ENSG00000163975.10	2644.98	2.93332	0.274116	10.701	1.00633e-26	1.1291e-24
ENSG00000204479.4	2.63154	2.9233	0.728843	4.01088	6.04939e-05	0.0001938
ENSG00000169248.11	1062.65	2.92311	0.350419	8.34178	7.31807e-17	1.8258e-15
ENSG00000102794.8	8.39057	2.92129	0.481966	6.0612	1.35113e-09	9.9847e-09
ENSG00000108821.12	243421	2.91573	0.244412	11.9296	8.29798e-33	2.50663e-30
ENSG00000248329.4	25.0566	2.90993	0.389522	7.47052	7.98759e-14	1.19449e-12
ENSG00000184478.6	2.42346	2.90758	0.922309	3.1525	0.00161879	0.00387386
ENSG00000135355.3	2.41831	2.90288	0.821432	3.53392	0.000409438	0.00111255
ENSG00000205359.8	4.35814	2.9023	0.786231	3.69141	0.000223012	0.000638687
ENSG00000160471.11	121.683	2.89882	0.354245	8.18309	2.76667e-16	6.26569e-15
ENSG00000179059.8	12.405	2.88605	0.694782	4.15389	3.26864e-05	0.000110502
ENSG00000143355.14	11.574	2.87801	0.514191	5.59716	2.1789e-08	1.30237e-07
ENSG00000169436.15	495.161	2.87648	0.344617	8.3469	7.0079e-17	1.75565e-15
ENSG00000155622.6	4.97149	2.87163	0.82004	3.50182	0.000462094	0.0012441
ENSG00000101282.7	117.674	2.8662	0.491706	5.82909	5.57307e-09	3.67082e-08
ENSG00000169495.4	49.3581	2.86313	0.293447	9.75689	1.7236e-22	1.03179e-20
ENSG00000148965.7	25.351	2.86181	0.516116	5.54489	2.94137e-08	1.71835e-07
ENSG00000139292.11	1842.75	2.85317	0.371544	7.67924	1.60036e-14	2.71825e-13
ENSG00000117983.16	18383.9	2.84714	0.481861	5.90863	3.44959e-09	2.37742e-08
ENSG00000100253.11	72.0447	2.84413	0.420055	6.77086	1.28018e-11	1.33349e-10
ENSG00000181085.13	355.971	2.8432	0.264993	10.7294	7.41073e-27	8.66129e-25
ENSG00000279560.1	1.88388	2.84122	0.831518	3.41691	0.000633359	0.00165615
ENSG00000106648.12	7.84226	2.83203	0.630209	4.49379	6.99666e-06	2.6953e-05
ENSG00000238269.7	6.05495	2.83154	0.790218	3.58324	0.000339363	0.000939564
ENSG00000106536.18	168.605	2.82346	0.482528	5.8514	4.87447e-09	3.25878e-08
ENSG00000279973.1	2.1456	2.82317	0.915449	3.08392	0.00204293	0.00478275
ENSG00000152591.11	5.36794	2.81805	0.582828	4.83512	1.33064e-06	5.86468e-06
ENSG00000122136.12	3.37384	2.81689	0.545805	5.16098	2.45664e-07	1.23492e-06
ENSG00000137270.10	13.8754	2.81666	0.434062	6.48907	8.63681e-11	7.91338e-10
ENSG00000148704.11	6.27269	2.81447	0.608854	4.62258	3.78995e-06	1.53197e-05
ENSG00000169245.5	2599.26	2.81388	0.339031	8.29977	1.04314e-16	2.53806e-15
ENSG00000168875.2	111.861	2.81194	0.568331	4.94772	7.50884e-07	3.46338e-06
ENSG00000138136.6	3.66301	2.81012	0.66198	4.24502	2.18577e-05	7.65292e-05
ENSG00000262874.1	25.9921	2.80497	0.368499	7.61187	2.70151e-14	4.38744e-13
ENSG00000107984.8	1395.16	2.80168	0.496272	5.64544	1.64755e-08	1.00434e-07
ENSG00000151655.16	120.532	2.79345	0.410199	6.80997	9.76191e-12	1.03496e-10
ENSG00000124092.11	49.2711	2.78195	0.52355	5.31363	1.07462e-07	5.72598e-07
ENSG00000078098.12	882.739	2.7772	0.249309	11.1396	8.04677e-29	1.27418e-26
ENSG00000174325.4	5.14975	2.76624	0.51192	5.40366	6.52955e-08	3.60844e-07
ENSG00000227234.1	2.52659	2.76551	0.95145	2.90663	0.00365349	0.00806298
ENSG00000156269.4	7.79379	2.76507	0.721205	3.83396	0.000126096	0.000379971
ENSG00000138152.8	117.379	2.7637	0.31754	8.70346	3.21928e-18	1.03285e-16
ENSG00000196119.6	3.79312	2.76177	0.81701	3.38033	0.000723979	0.00186872
ENSG00000179046.7	9.42993	2.75992	0.594433	4.64294	3.43483e-06	1.39807e-05
ENSG00000213937.3	135.251	2.75549	0.378644	7.27726	3.40667e-13	4.62266e-12
ENSG00000147206.15	223.684	2.74977	0.447649	6.14268	8.11381e-10	6.19901e-09
ENSG00000135374.8	127.616	2.74965	0.515256	5.33647	9.47742e-08	5.10204e-07
ENSG00000100341.10	2.70623	2.74904	0.646295	4.25354	2.10414e-05	7.38952e-05
ENSG00000212724.3	2.23279	2.74903	0.769052	3.57456	0.000350811	0.000967576
ENSG00000248405.8	41.0714	2.7472	0.241332	11.3835	5.0545e-30	9.72991e-28
ENSG00000189410.10	51.0685	2.7448	0.354711	7.73813	1.00889e-14	1.78144e-13
ENSG00000100867.13	307.395	2.74173	0.399218	6.86775	6.52211e-12	7.1234e-11
ENSG00000170689.9	1081.65	2.73961	0.350659	7.81275	5.59551e-15	1.03454e-13
ENSG00000184937.11	65.3986	2.7395	0.455208	6.01813	1.76446e-09	1.27889e-08
ENSG00000162782.14	200.81	2.73751	0.348313	7.85933	3.86189e-15	7.36196e-14
ENSG00000251258.1	3.69819	2.7372	0.712679	3.84072	0.000122674	0.000370285
ENSG00000131686.13	20.3966	2.73701	0.555798	4.92447	8.45874e-07	3.87094e-06
ENSG00000152595.15	2.69776	2.73435	0.638188	4.28455	1.83109e-05	6.49685e-05
ENSG00000205754.9	4.1881	2.73319	0.674143	4.05431	5.02823e-05	0.000163935
ENSG00000095739.10	1649.73	2.7329	0.344112	7.94191	1.99099e-15	4.01367e-14
ENSG00000179603.16	66.9014	2.73069	0.289978	9.4169	4.64595e-21	2.26361e-19
ENSG00000205277.8	1268.25	2.72463	0.413607	6.5875	4.47304e-11	4.28221e-10
ENSG00000239590.1	3.50508	2.72095	0.549153	4.95481	7.24027e-07	3.34658e-06
ENSG00000164256.8	4.87796	2.72087	0.690182	3.94225	8.07225e-05	0.000252306
ENSG00000171388.11	608.261	2.71578	0.27561	9.85371	6.60571e-23	4.23866e-21
ENSG00000206531.9	5.93257	2.70919	0.529049	5.12087	3.04122e-07	1.50566e-06
ENSG00000164411.9	44.2681	2.7087	0.439688	6.16052	7.25085e-10	5.58535e-09
ENSG00000103355.11	97.8174	2.70704	0.414464	6.53143	6.5146e-11	6.09115e-10
ENSG00000213886.3	1966.91	2.70384	0.32615	8.29018	1.13077e-16	2.73096e-15
ENSG00000142661.17	558.666	2.70319	0.348309	7.76089	8.43341e-15	1.51362e-13
ENSG00000168334.8	88.0871	2.70044	0.361969	7.46042	8.62449e-14	1.27709e-12
ENSG00000163739.4	4786.35	2.69174	0.322204	8.35415	6.59057e-17	1.66331e-15
ENSG00000128422.14	7309.67	2.69032	0.461392	5.83088	5.51369e-09	3.63782e-08
ENSG00000187690.3	30.6875	2.69014	0.690857	3.89391	9.86399e-05	0.00030305
ENSG00000175874.8	213.489	2.68991	0.357594	7.52227	5.38343e-14	8.33625e-13
ENSG00000189023.9	1.8644	2.68857	0.790661	3.40041	0.000672845	0.00174961
ENSG00000168124.2	2.42206	2.6859	0.684589	3.92338	8.7316e-05	0.000271317
ENSG00000251664.3	50.6563	2.68152	0.548383	4.88987	1.00902e-06	4.55803e-06
ENSG00000205642.8	3.07113	2.68043	0.736014	3.64181	0.000270723	0.000762757
ENSG00000176746.6	1.69895	2.67175	0.801241	3.33451	0.000854485	0.0021702
ENSG00000104327.6	171.015	2.67001	0.444988	6.00019	1.97081e-09	1.41799e-08
ENSG00000147889.15	1892.02	2.66996	0.356529	7.48876	6.95278e-14	1.05257e-12
ENSG00000164175.13	15.877	2.6663	0.439943	6.06056	1.35646e-09	1.00203e-08
ENSG00000140873.14	72.3293	2.66621	0.310602	8.58399	9.16378e-18	2.69358e-16
ENSG00000095970.15	548.003	2.66214	0.245843	10.8286	2.51933e-27	3.03479e-25
ENSG00000183734.4	2451.68	2.66196	0.367026	7.25277	4.0833e-13	5.46155e-12
ENSG00000019186.8	77.5674	2.66117	0.467906	5.68741	1.28978e-08	8.02435e-08
ENSG00000130182.6	10.9009	2.66111	0.490867	5.42124	5.91867e-08	3.2987e-07
ENSG00000274391.3	4.28388	2.66043	0.895272	2.97165	0.00296205	0.00667968
ENSG00000171405.11	2.18646	2.65679	1.17716	2.25694	0.0240117	0.0431669
ENSG00000081051.6	46.974	2.656	0.57849	4.59127	4.40564e-06	1.75823e-05
ENSG00000198173.4	1.91691	2.65345	0.883287	3.00406	0.00266401	0.00606398
ENSG00000180475.4	3.31567	2.64973	0.636162	4.16519	3.11095e-05	0.000105462
ENSG00000105173.12	1311.68	2.64673	0.302141	8.7599	1.95421e-18	6.50354e-17
ENSG00000180210.13	44.1827	2.64575	0.450645	5.87102	4.33119e-09	2.91943e-08
ENSG00000087116.12	4408.74	2.64457	0.2271	11.645	2.43463e-31	5.75952e-29
ENSG00000180318.3	10.5413	2.64318	0.797996	3.31228	0.0009254	0.00233461
ENSG00000163064.6	14.506	2.63835	0.563463	4.68239	2.83553e-06	1.17158e-05
ENSG00000204936.8	679.005	2.63806	0.449845	5.86438	4.50825e-09	3.03149e-08
ENSG00000105219.7	158.33	2.63331	0.348932	7.54678	4.46165e-14	7.03087e-13
ENSG00000183304.9	1.55367	2.62981	0.785482	3.34802	0.00081391	0.00207655
ENSG00000127325.17	22.3794	2.62806	0.442685	5.93664	2.90926e-09	2.03069e-08
ENSG00000169840.4	1.99848	2.62728	0.833475	3.15221	0.00162042	0.0038764
ENSG00000162849.14	2063.48	2.62157	0.224516	11.6765	1.67983e-31	4.17512e-29
ENSG00000263513.4	46.3861	2.62	0.267617	9.79009	1.24187e-22	7.59632e-21
ENSG00000175832.11	2897.36	2.61957	0.250481	10.4582	1.34414e-25	1.33294e-23
ENSG00000213030.5	3.4865	2.61761	0.797955	3.28039	0.00103662	0.00258925
ENSG00000198535.5	1144.66	2.61659	0.334205	7.82928	4.90662e-15	9.15793e-14
ENSG00000165309.12	59.9696	2.60975	0.376343	6.9345	4.07649e-12	4.63205e-11
ENSG00000049247.12	48.9029	2.60892	0.395285	6.60009	4.10906e-11	3.96079e-10
ENSG00000134339.7	584.283	2.60677	0.446835	5.83385	5.41619e-09	3.58674e-08
ENSG00000170523.3	6.50255	2.59481	0.622918	4.16558	3.10561e-05	0.000105317
ENSG00000130513.6	5188.55	2.59017	0.251772	10.2877	8.00277e-25	7.01493e-23
ENSG00000165588.15	3.49438	2.589	0.810575	3.19403	0.00140302	0.00339935
ENSG00000123496.6	85.4818	2.57934	0.364112	7.08391	1.40141e-12	1.70593e-11
ENSG00000112273.6	2.16702	2.57548	0.900476	2.86013	0.00423471	0.00918971
ENSG00000132031.11	388.363	2.57386	0.295212	8.71869	2.81439e-18	9.13397e-17
ENSG00000128578.8	584.39	2.57293	0.22377	11.4981	1.34855e-30	2.78725e-28
ENSG00000174016.10	5.48328	2.57038	0.568624	4.52034	6.17394e-06	2.39908e-05
ENSG00000196611.4	8802.6	2.56518	0.37387	6.86118	6.82959e-12	7.43755e-11
ENSG00000138316.9	811.313	2.56448	0.229008	11.1982	4.16058e-29	6.92313e-27
ENSG00000183770.5	27.8549	2.56267	0.497538	5.1507	2.59512e-07	1.29822e-06
ENSG00000168619.14	3.21354	2.55888	0.722739	3.54053	0.000399325	0.00108671
ENSG00000008300.13	1524.46	2.54959	0.232478	10.967	5.50716e-28	7.49342e-26
ENSG00000171551.10	207.36	2.54959	0.360636	7.06969	1.55282e-12	1.87975e-11
ENSG00000164362.17	127.59	2.54794	0.329364	7.73594	1.02645e-14	1.80918e-13
ENSG00000105464.3	3173.49	2.54736	0.263384	9.67167	3.97841e-22	2.28409e-20
ENSG00000183914.13	318.613	2.54605	0.325106	7.83146	4.82249e-15	9.02666e-14
ENSG00000118193.10	936.357	2.54492	0.177941	14.3021	2.12383e-46	4.63348e-43
ENSG00000155890.3	1.68777	2.54478	0.915203	2.78056	0.00542651	0.0114717
ENSG00000167139.7	1.93561	2.54246	0.681677	3.72971	0.000191702	0.000556239
ENSG00000144130.10	40.9954	2.5403	0.292733	8.67789	4.03185e-18	1.26868e-16
ENSG00000122584.11	7.33484	2.53625	0.544443	4.65843	3.18632e-06	1.30422e-05
ENSG00000185105.4	45.6176	2.53139	0.409265	6.18522	6.20154e-10	4.84357e-09
ENSG00000184108.6	3.84076	2.52408	0.731187	3.45203	0.000556377	0.00147449
ENSG00000011677.11	208.016	2.52065	0.589227	4.27789	1.88671e-05	6.67488e-05
ENSG00000157330.8	5.74572	2.51398	0.525566	4.78337	1.7238e-06	7.44706e-06
ENSG00000101104.11	1399.25	2.51095	0.223821	11.2185	3.30668e-29	5.74573e-27
ENSG00000165202.3	2.99964	2.50985	0.546912	4.58912	4.45115e-06	1.7753e-05
ENSG00000268975.1	2.56003	2.50644	0.649626	3.85827	0.00011419	0.000346971
ENSG00000254726.2	710.497	2.50014	0.270423	9.2453	2.34575e-20	1.02353e-18
ENSG00000204140.9	16.5413	2.49956	0.551934	4.52874	5.93371e-06	2.31397e-05
ENSG00000204952.2	6.13728	2.49891	0.533671	4.6825	2.83395e-06	1.17122e-05
ENSG00000164434.10	13.3087	2.49612	0.50267	4.96573	6.84448e-07	3.18086e-06
ENSG00000115363.12	242.027	2.49369	0.28096	8.87561	6.95514e-19	2.43865e-17
ENSG00000104827.12	3.17442	2.49326	0.711455	3.50445	0.000457547	0.00123287
ENSG00000167014.9	2.66266	2.49197	0.638329	3.9039	9.46549e-05	0.000292041
ENSG00000182492.14	31163.8	2.48823	0.21491	11.578	5.32837e-31	1.16816e-28
ENSG00000179772.7	305.076	2.48806	0.226754	10.9725	5.18339e-28	7.24813e-26
ENSG00000221986.5	42.9651	2.48582	0.476215	5.21995	1.78975e-07	9.21873e-07
ENSG00000130208.8	2666.84	2.4856	0.290999	8.54162	1.32352e-17	3.76629e-16
ENSG00000131747.13	12711.3	2.48256	0.217353	11.4218	3.25522e-30	6.32834e-28
ENSG00000180767.8	300.873	2.48233	0.373838	6.64011	3.13447e-11	3.06348e-10
ENSG00000261587.2	15.4378	2.48224	0.34531	7.18844	6.55369e-13	8.43261e-12
ENSG00000171564.10	255.543	2.48166	0.607166	4.08729	4.36448e-05	0.000143907
ENSG00000160349.8	2.97141	2.48098	0.504209	4.92054	8.6305e-07	3.94093e-06
ENSG00000058085.13	13162.7	2.48068	0.24901	9.96216	2.23154e-23	1.54828e-21
ENSG00000205442.11	2.56203	2.4773	0.865666	2.86173	0.00421336	0.0091538
ENSG00000182747.4	103.467	2.46868	0.477861	5.16611	2.39021e-07	1.20431e-06
ENSG00000267706.3	5.23804	2.46453	0.563452	4.37399	1.21999e-05	4.47747e-05
ENSG00000268223.2	3.29221	2.46425	0.646493	3.81171	0.000138007	0.000412256
ENSG00000143107.7	4.31117	2.46064	0.518501	4.74567	2.07812e-06	8.84735e-06
ENSG00000175877.3	15.9458	2.45601	0.386743	6.35049	2.14634e-10	1.82597e-09
ENSG00000255181.3	3.60679	2.45405	0.520588	4.714	2.42903e-06	1.01801e-05
ENSG00000163735.6	11125.3	2.45021	0.481045	5.09353	3.51462e-07	1.71965e-06
ENSG00000197153.4	11.2898	2.44597	0.318468	7.68042	1.58565e-14	2.6956e-13
ENSG00000185940.10	12.7298	2.44448	0.529346	4.61793	3.87582e-06	1.56298e-05
ENSG00000099399.5	41.7375	2.43666	0.743276	3.27828	0.00104443	0.00260808
ENSG00000258227.5	202.27	2.4217	0.265152	9.13325	6.6476e-20	2.7374e-18
ENSG00000088305.17	648.748	2.42166	0.244512	9.90405	3.99754e-23	2.64281e-21
ENSG00000173894.9	850.521	2.41725	0.274857	8.79455	1.43619e-18	4.84529e-17
ENSG00000184735.6	11.8564	2.41311	0.702809	3.43352	0.000595808	0.00157008
ENSG00000259823.4	115.826	2.41221	0.522016	4.62095	3.81978e-06	1.54197e-05
ENSG00000135094.9	785.459	2.41073	0.232075	10.3877	2.82047e-25	2.64976e-23
ENSG00000124233.11	96.9317	2.40916	0.512332	4.70234	2.57194e-06	1.0731e-05
ENSG00000125872.7	109.443	2.40791	0.349077	6.89794	5.27627e-12	5.87966e-11
ENSG00000005421.7	44.1139	2.39979	0.456915	5.25217	1.50322e-07	7.82373e-07
ENSG00000145506.12	631.17	2.39878	0.351731	6.81993	9.10877e-12	9.68856e-11
ENSG00000225614.2	1280.01	2.39551	0.236988	10.1081	5.08403e-24	3.9147e-22
ENSG00000179709.7	4.25068	2.39517	0.635189	3.7708	0.000162724	0.000479527
ENSG00000176244.6	91.8233	2.39279	0.281742	8.49285	2.0163e-17	5.56041e-16
ENSG00000186340.13	9990.45	2.39261	0.271966	8.79749	1.39911e-18	4.72833e-17
ENSG00000114346.12	6305.28	2.39175	0.169224	14.1336	2.35685e-45	3.85639e-42
ENSG00000108813.10	121.343	2.3917	0.340999	7.01379	2.31949e-12	2.72551e-11
ENSG00000179934.6	41.5678	2.38071	0.270549	8.79954	1.37375e-18	4.65061e-17
ENSG00000163121.8	265.545	2.37636	0.346674	6.85473	7.14459e-12	7.75478e-11
ENSG00000120659.13	156.719	2.37425	0.248682	9.54731	1.33109e-21	6.89601e-20
ENSG00000237452.2	8.75286	2.37093	0.466321	5.08432	3.68943e-07	1.79756e-06
ENSG00000156009.8	10.8503	2.3669	0.505786	4.67965	2.87371e-06	1.18516e-05
ENSG00000180305.4	3.52945	2.36423	0.611866	3.86397	0.000111558	0.000339603
ENSG00000161652.11	15.3601	2.36325	0.446887	5.28826	1.23488e-07	6.52324e-07
ENSG00000169856.8	51.8426	2.36128	0.535063	4.41308	1.01909e-05	3.80368e-05
ENSG00000244355.6	3.66526	2.35196	0.853604	2.75532	0.00586341	0.0122908
ENSG00000092853.12	970.794	2.34821	0.162017	14.4936	1.33026e-47	3.73137e-44
ENSG00000137573.12	13803.8	2.34818	0.249509	9.41118	4.906e-21	2.3785e-19
ENSG00000107593.16	36.3812	2.34441	0.279923	8.3752	5.51298e-17	1.41131e-15
ENSG00000135903.17	4.63728	2.34335	0.643159	3.6435	0.000268951	0.000758742
ENSG00000248385.6	3.11318	2.34002	0.583148	4.01274	6.00192e-05	0.000192342
ENSG00000178752.14	159.108	2.33838	0.272311	8.58717	8.91373e-18	2.63604e-16
ENSG00000223614.3	1.87871	2.338	0.776294	3.01175	0.0025975	0.00593274
ENSG00000203740.3	5.18005	2.33695	0.528453	4.42223	9.76852e-06	3.65525e-05
ENSG00000178645.11	2.07857	2.32804	0.693633	3.35631	0.000789913	0.00201926
ENSG00000124391.4	67.3861	2.32775	0.409069	5.69035	1.26777e-08	7.89993e-08
ENSG00000126778.8	249.021	2.32754	0.318105	7.3169	2.53765e-13	3.51635e-12
ENSG00000142408.2	112.228	2.32694	0.311295	7.47502	7.71916e-14	1.16053e-12
ENSG00000173572.10	5.28843	2.32606	0.733002	3.17334	0.00150697	0.00362794
ENSG00000104755.13	4.66372	2.32541	0.708279	3.28319	0.00102639	0.00256533
ENSG00000114854.6	206.764	2.32503	0.339938	6.83956	7.94395e-12	8.54682e-11
ENSG00000137707.12	1.79958	2.3204	0.696918	3.32952	0.000869974	0.00220412
ENSG00000125823.11	10.8431	2.31493	0.440387	5.25657	1.46764e-07	7.65777e-07
ENSG00000262406.2	3465.83	2.31447	0.366733	6.31105	2.77142e-10	2.30972e-09
ENSG00000133048.11	2624.21	2.31363	0.303922	7.61257	2.68707e-14	4.36761e-13
ENSG00000160882.10	2.34279	2.31303	0.665434	3.47598	0.000508995	0.00135919
ENSG00000198798.5	1.43389	2.31232	0.791907	2.91994	0.00350102	0.00777104
ENSG00000143105.6	6.42935	2.30954	0.528982	4.366	1.2654e-05	4.62598e-05
ENSG00000198765.10	6.11125	2.30501	0.671769	3.43126	0.000600789	0.00158151
ENSG00000117724.11	5604.58	2.29792	0.188549	12.1874	3.63009e-34	1.51653e-31
ENSG00000184471.7	3.19231	2.29568	0.557319	4.11915	3.80273e-05	0.000127006
ENSG00000146038.10	393.839	2.29488	0.398911	5.75287	8.77403e-09	5.62449e-08
ENSG00000196155.11	1608.02	2.29006	0.228872	10.0059	1.43622e-23	1.03297e-21
ENSG00000149927.16	100.958	2.28467	0.336991	6.77964	1.20475e-11	1.25825e-10
ENSG00000123576.5	1.804	2.28435	0.804286	2.84022	0.00450819	0.0097198
ENSG00000128342.4	1685.6	2.28306	0.22267	10.2531	1.14593e-24	9.78273e-23
ENSG00000163424.7	4.97623	2.28259	0.692496	3.29617	0.000980125	0.00245814
ENSG00000144395.16	170.304	2.28118	0.20354	11.2076	3.7439e-29	6.33719e-27
ENSG00000149507.5	1.72077	2.2794	0.843963	2.70082	0.00691679	0.0142584
ENSG00000215454.5	1.68703	2.27853	0.660956	3.44732	0.000566179	0.00149743
ENSG00000187600.11	3.08348	2.27459	0.748461	3.03903	0.00237344	0.00547234
ENSG00000186185.12	1685.82	2.27371	0.181925	12.4981	7.64975e-36	4.05954e-33
ENSG00000279804.1	3.13998	2.27057	0.82086	2.76609	0.0056733	0.0119369
ENSG00000129170.7	3.00071	2.26928	0.49747	4.56164	5.07567e-06	2.00162e-05
ENSG00000198216.9	229.696	2.26795	0.376273	6.02742	1.66593e-09	1.2124e-08
ENSG00000258223.5	1.71067	2.26345	0.592972	3.81713	0.000135013	0.000404114
ENSG00000165762.2	2.49824	2.26207	0.769285	2.94048	0.00327699	0.00732427
ENSG00000163673.6	51.4451	2.25697	0.230305	9.79989	1.12707e-22	6.95912e-21
ENSG00000065328.15	754.756	2.25528	0.191034	11.8057	3.64817e-32	1.0089e-29
ENSG00000146166.15	142.108	2.25457	0.563697	3.9996	6.34489e-05	0.000202572
ENSG00000050344.8	4246.88	2.25453	0.165568	13.6169	3.17684e-42	3.66925e-39
ENSG00000094804.8	2210.95	2.25451	0.229627	9.81816	9.40432e-23	5.86203e-21
ENSG00000257062.5	1.17797	2.2535	0.798702	2.82146	0.00478062	0.0102509
ENSG00000137869.12	49.115	2.25205	0.294508	7.64683	2.05991e-14	3.43347e-13
ENSG00000154438.6	2.65249	2.25183	0.670194	3.35997	0.000779501	0.00199837
ENSG00000236279.5	84.1659	2.24347	0.449431	4.99181	5.98173e-07	2.81253e-06
ENSG00000250423.2	8.12641	2.24333	0.408988	5.48508	4.13292e-08	2.35627e-07
ENSG00000229637.3	37.7747	2.24309	0.431192	5.20207	1.97081e-07	1.0059e-06
ENSG00000133962.6	311.086	2.24248	0.289945	7.73418	1.0407e-14	1.83074e-13
ENSG00000187475.5	2.95956	2.24095	0.552145	4.05862	4.93631e-05	0.000161218
ENSG00000167749.10	22.8577	2.24022	0.493315	4.54116	5.59469e-06	2.19134e-05
ENSG00000135638.12	245.119	2.2398	0.412746	5.42658	5.74426e-08	3.20787e-07
ENSG00000145244.10	207.574	2.23957	0.252028	8.88619	6.32401e-19	2.2293e-17
ENSG00000179142.2	1.5591	2.23826	0.982666	2.27774	0.022742	0.0411368
ENSG00000281855.1	6.24793	2.23253	0.365128	6.11437	9.69373e-10	7.33756e-09
ENSG00000157193.13	1288.19	2.2262	0.21543	10.3338	4.95794e-25	4.42496e-23
ENSG00000088325.14	6526.89	2.22545	0.188027	11.8358	2.54962e-32	7.47192e-30
ENSG00000123473.14	1837.91	2.22369	0.163258	13.6207	3.01662e-42	3.66925e-39
ENSG00000182379.9	362.345	2.22302	0.373425	5.95305	2.6319e-09	1.85224e-08
ENSG00000154997.8	10.4614	2.22281	0.526737	4.21997	2.44337e-05	8.47773e-05
ENSG00000163395.15	74.4629	2.22251	0.440313	5.04756	4.47482e-07	2.1588e-06
ENSG00000115507.8	502.425	2.22043	0.213029	10.4231	1.94425e-25	1.86221e-23
ENSG00000203857.8	5.99947	2.22041	0.691228	3.21228	0.00131688	0.00321164
ENSG00000204007.5	2.94439	2.21949	0.864194	2.56828	0.0102206	0.0202096
ENSG00000171126.7	34.0637	2.21753	0.375682	5.90267	3.57664e-09	2.45636e-08
ENSG00000146276.10	52.2736	2.21685	0.4945	4.48301	7.35962e-06	2.82073e-05
ENSG00000249158.5	57.9612	2.21552	0.493763	4.487	7.22316e-06	2.77874e-05
ENSG00000141946.1	3.68049	2.21203	0.635789	3.47919	0.00050294	0.00134375
ENSG00000204539.3	9.20737	2.21179	0.388215	5.69733	1.21697e-08	7.59785e-08
ENSG00000071539.12	1371.86	2.20588	0.186676	11.8166	3.20279e-32	9.11403e-30
ENSG00000241476.6	1.15821	2.2057	0.929435	2.37316	0.0176365	0.0328116
ENSG00000119915.4	28.4314	2.20368	0.328597	6.70632	1.99591e-11	2.01386e-10
ENSG00000136944.16	156.462	2.1966	0.419934	5.23082	1.68758e-07	8.7176e-07
ENSG00000215784.5	72.2392	2.19514	0.224371	9.78357	1.32453e-22	8.07676e-21
ENSG00000124134.7	70.1029	2.19131	0.391587	5.59598	2.19373e-08	1.31043e-07
ENSG00000107187.14	3.94393	2.19062	0.570723	3.83832	0.00012388	0.00037381
ENSG00000085741.11	622.854	2.19047	0.436932	5.0133	5.35038e-07	2.54185e-06
ENSG00000154162.12	37.569	2.19044	0.569129	3.84875	0.00011872	0.000359565
ENSG00000198734.9	3294.15	2.19022	0.348	6.29373	3.09922e-10	2.56656e-09
ENSG00000132297.10	3.00227	2.18974	0.625838	3.49889	0.000467191	0.00125661
ENSG00000081479.11	77.1478	2.18833	0.445282	4.91448	8.90204e-07	4.05737e-06
ENSG00000171804.8	17.3848	2.18765	0.415432	5.26595	1.39463e-07	7.30812e-07
ENSG00000123561.13	8.76689	2.1834	0.973378	2.24312	0.024889	0.0445971
ENSG00000278919.1	49.3125	2.18186	0.258551	8.4388	3.20603e-17	8.54143e-16
ENSG00000196584.2	553.929	2.18145	0.163735	13.323	1.70043e-40	1.45165e-37
ENSG00000042304.9	4.16362	2.17961	0.572664	3.80608	0.000141186	0.000421048
ENSG00000204849.6	1.49387	2.17936	0.828302	2.63111	0.00851053	0.0171847
ENSG00000160957.11	2292.96	2.17887	0.185756	11.7297	8.97806e-32	2.35046e-29
ENSG00000268104.2	2969.91	2.17738	0.366034	5.94856	2.70519e-09	1.89973e-08
ENSG00000117707.14	1599.69	2.17499	0.379302	5.73419	9.79766e-09	6.21373e-08
ENSG00000226372.2	1.59089	2.17288	0.848527	2.56077	0.0104441	0.0205831
ENSG00000196341.2	2.31652	2.16809	0.823316	2.63337	0.0084543	0.0170852
ENSG00000151033.8	1.39946	2.16803	0.765268	2.83303	0.00461093	0.00991627
ENSG00000169174.10	1845.74	2.16173	0.317685	6.80463	1.01307e-11	1.0706e-10
ENSG00000164532.10	9.55908	2.16028	0.607649	3.55514	0.000377781	0.00103412
ENSG00000174371.15	769.155	2.15852	0.177433	12.1653	4.75742e-34	1.90636e-31
ENSG00000196091.11	367.802	2.1579	0.525678	4.10498	4.04353e-05	0.000134362
ENSG00000188162.9	18.4796	2.15574	0.420476	5.12692	2.94526e-07	1.46147e-06
ENSG00000135119.13	600.085	2.15558	0.192981	11.1699	5.72144e-29	9.28434e-27
ENSG00000175894.13	100.361	2.15466	0.333517	6.46041	1.0442e-10	9.4223e-10
ENSG00000154920.13	267.158	2.15028	0.173271	12.4099	2.30837e-35	1.13312e-32
ENSG00000185899.1	2.22408	2.14942	0.591625	3.63307	0.000280066	0.000786371
ENSG00000143452.14	122.554	2.14922	0.449977	4.7763	1.78554e-06	7.6901e-06
ENSG00000196350.8	4.28836	2.147	0.56268	3.81567	0.000135817	0.00040629
ENSG00000125363.13	7.63888	2.14481	0.446503	4.80358	1.55856e-06	6.78693e-06
ENSG00000145309.5	1.77929	2.1413	0.801032	2.67317	0.00751374	0.0153408
ENSG00000075290.7	20.2023	2.14018	0.324294	6.59951	4.12531e-11	3.97256e-10
ENSG00000183682.7	242.422	2.13995	0.205594	10.4086	2.26496e-25	2.15886e-23
ENSG00000106484.13	3381.06	2.13572	0.195872	10.9036	1.10759e-27	1.45956e-25
ENSG00000133980.4	81.7731	2.13544	0.42458	5.02955	4.91638e-07	2.35389e-06
ENSG00000173769.4	5.2559	2.13022	0.655698	3.24877	0.00115904	0.00286044
ENSG00000178773.13	535.955	2.13021	0.287694	7.40445	1.31695e-13	1.90837e-12
ENSG00000077935.15	83.7704	2.12796	0.335061	6.35095	2.13991e-10	1.82129e-09
ENSG00000203747.8	2721.56	2.12589	0.243734	8.72217	2.72911e-18	8.87186e-17
ENSG00000279588.1	1.54332	2.12538	0.662276	3.2092	0.00133103	0.00324293
ENSG00000186329.8	3.30479	2.12427	0.631806	3.36222	0.000773198	0.00198428
ENSG00000204422.7	1.06788	2.12157	0.967323	2.19324	0.0282903	0.0498546
ENSG00000188095.4	61.8956	2.12116	0.333195	6.36613	1.93854e-10	1.66288e-09
ENSG00000090932.9	43.8515	2.12038	0.412914	5.13516	2.819e-07	1.40378e-06
ENSG00000148795.5	95.1502	2.11998	0.45614	4.64766	3.35727e-06	1.36962e-05
ENSG00000151838.10	9.2618	2.11984	0.519716	4.07884	4.52617e-05	0.000148813
ENSG00000159374.16	172.487	2.11722	0.309618	6.83816	8.02152e-12	8.61612e-11
ENSG00000175329.11	260.81	2.1172	0.602929	3.51153	0.000445532	0.00120231
ENSG00000228727.7	35.1536	2.11347	0.249064	8.48565	2.14525e-17	5.87822e-16
ENSG00000146839.17	33.7184	2.1129	0.441594	4.78472	1.71227e-06	7.40213e-06
ENSG00000196550.9	89.4779	2.10962	0.183774	11.4794	1.6741e-30	3.42405e-28
ENSG00000137807.12	1822.38	2.10928	0.168934	12.4858	8.92055e-36	4.49115e-33
ENSG00000111012.8	270.098	2.10636	0.220318	9.56052	1.17163e-21	6.11834e-20
ENSG00000165891.14	687.562	2.10505	0.207385	10.1504	3.2999e-24	2.61265e-22
ENSG00000151025.9	274.972	2.10488	0.346588	6.07314	1.2543e-09	9.30067e-09
ENSG00000116039.10	105.298	2.10283	0.350472	6	1.97323e-09	1.41921e-08
ENSG00000133216.15	6261.98	2.10098	0.272546	7.70872	1.27088e-14	2.18509e-13
ENSG00000101812.11	1.39982	2.09766	0.910229	2.30454	0.0211925	0.0386257
ENSG00000101255.9	2048.97	2.09378	0.26911	7.78039	7.23038e-15	1.31696e-13
ENSG00000185177.11	1.8504	2.0935	0.709903	2.94899	0.00318815	0.00714114
ENSG00000183856.9	4139.99	2.08963	0.178942	11.6777	1.65705e-31	4.17131e-29
ENSG00000011083.7	66.9923	2.0886	0.39575	5.27756	1.30914e-07	6.88773e-07
ENSG00000117650.11	1335.04	2.08656	0.194565	10.7242	7.83581e-27	9.05036e-25
ENSG00000184925.10	131.846	2.086	0.301507	6.9186	4.56144e-12	5.14144e-11
ENSG00000088882.7	1046.05	2.08599	0.250344	8.33249	7.91607e-17	1.96253e-15
ENSG00000186564.5	572.902	2.08595	0.215161	9.69482	3.17185e-22	1.85355e-20
ENSG00000107807.11	216.701	2.08266	0.374994	5.55386	2.79435e-08	1.64076e-07
ENSG00000170099.5	41.0829	2.08237	0.513915	4.05197	5.07892e-05	0.000165463
ENSG00000167646.12	101.881	2.08043	0.274625	7.57555	3.57606e-14	5.70397e-13
ENSG00000101057.14	6121.41	2.0804	0.213641	9.73783	2.07953e-22	1.23358e-20
ENSG00000072080.9	1.43936	2.079	0.771131	2.69604	0.00701687	0.0144359
ENSG00000146809.11	8.13745	2.07712	0.508172	4.08743	4.36171e-05	0.00014384
ENSG00000175985.9	53.4554	2.0763	0.332765	6.23954	4.38867e-10	3.5244e-09
ENSG00000166948.8	2.3376	2.07273	0.671354	3.08739	0.00201923	0.00473177
ENSG00000166682.9	115.629	2.07205	0.339225	6.10818	1.00773e-09	7.6074e-09
ENSG00000197123.8	1.95868	2.07191	0.79292	2.61302	0.0089747	0.0180219
ENSG00000150337.12	247.276	2.06908	0.227255	9.10464	8.6554e-20	3.49689e-18
ENSG00000177800.2	4.24788	2.06876	0.410007	5.04567	4.51925e-07	2.1797e-06
ENSG00000133488.13	168.965	2.06793	0.426593	4.84755	1.24993e-06	5.55005e-06
ENSG00000144015.4	1.46433	2.06765	0.851345	2.42868	0.0151537	0.0286567
ENSG00000121621.6	781.229	2.06732	0.176266	11.7284	9.11665e-32	2.35533e-29
ENSG00000101448.12	3.01348	2.06503	0.592435	3.48567	0.000490902	0.00131463
ENSG00000146070.15	889.354	2.06447	0.237597	8.68895	3.65791e-18	1.16219e-16
ENSG00000168779.18	85.0123	2.06316	0.317054	6.50726	7.65345e-11	7.09516e-10
ENSG00000184661.12	906.979	2.06292	0.196835	10.4804	1.06246e-25	1.06436e-23
ENSG00000163736.3	49.6635	2.06283	0.444915	4.63646	3.54434e-06	1.43966e-05
ENSG00000112333.10	14.1544	2.06277	0.505973	4.07684	4.5652e-05	0.000150046
ENSG00000213218.8	1.20393	2.06173	0.856704	2.40658	0.0161027	0.0302677
ENSG00000173621.8	2593.39	2.0615	0.172928	11.9211	9.18371e-33	2.73215e-30
ENSG00000132749.9	526.349	2.05966	0.207376	9.93204	3.02024e-23	2.04745e-21
ENSG00000124225.14	12500.6	2.05956	0.246972	8.33922	7.47799e-17	1.86097e-15
ENSG00000255223.3	1.36674	2.05948	0.703135	2.92899	0.00340065	0.00757221
ENSG00000184647.9	8.45424	2.058	0.470676	4.37243	1.22873e-05	4.50365e-05
ENSG00000109181.10	4.80853	2.05774	0.778498	2.64322	0.00821227	0.0166475
ENSG00000184814.5	1.78491	2.05451	0.826476	2.48587	0.0129237	0.0248124
ENSG00000172061.8	1034.91	2.04997	0.327667	6.25626	3.94309e-10	3.1917e-09
ENSG00000170965.8	31.2099	2.04453	0.411959	4.96294	6.94336e-07	3.22376e-06
ENSG00000120440.12	36.9073	2.04397	0.336228	6.07911	1.20851e-09	8.98147e-09
ENSG00000135747.10	31.1683	2.04301	0.21561	9.47548	2.65538e-21	1.33006e-19
ENSG00000183395.4	4.63376	2.04087	0.380949	5.35735	8.44513e-08	4.58067e-07
ENSG00000143512.11	18.6779	2.04011	0.354115	5.76115	8.35414e-09	5.36935e-08
ENSG00000066279.15	2585.04	2.03636	0.187125	10.8823	1.39934e-27	1.77265e-25
ENSG00000187833.7	3.27421	2.03557	0.606668	3.35533	0.000792702	0.00202613
ENSG00000169679.13	2399.24	2.03433	0.176245	11.5427	8.03828e-31	1.69711e-28
ENSG00000173699.14	3.54471	2.03239	0.594587	3.41815	0.000630484	0.00164973
ENSG00000154451.13	2422.16	2.03207	0.311244	6.52888	6.6265e-11	6.18694e-10
ENSG00000187416.10	87.5677	2.03014	0.433227	4.68609	2.78474e-06	1.15258e-05
ENSG00000149380.10	214.743	2.02983	0.220998	9.18486	4.12051e-20	1.74743e-18
ENSG00000117122.12	1367.66	2.02879	0.244709	8.29059	1.12691e-16	2.72835e-15
ENSG00000188334.3	2.205	2.02786	0.771629	2.62802	0.00858827	0.0173274
ENSG00000145040.3	38.9535	2.02592	0.366491	5.52789	3.24103e-08	1.88025e-07
ENSG00000185662.7	1.88946	2.02441	0.562035	3.60193	0.000315863	0.000879339
ENSG00000143228.11	934.071	2.02429	0.183116	11.0547	2.08086e-28	3.072e-26
ENSG00000175063.15	4365.6	2.02254	0.217346	9.30562	1.33214e-20	6.08291e-19
ENSG00000131951.9	12.0145	2.0205	0.376967	5.35988	8.32756e-08	4.52189e-07
ENSG00000163792.6	45.2919	2.01958	0.414655	4.8705	1.11315e-06	4.99012e-06
ENSG00000130433.6	27.926	2.01905	0.500298	4.0357	5.44407e-05	0.000176074
ENSG00000106366.8	6839.41	2.01902	0.275828	7.31986	2.48226e-13	3.44934e-12
ENSG00000148734.7	144.044	2.01781	0.288204	7.00133	2.53551e-12	2.95985e-11
ENSG00000188610.11	125.244	2.01643	0.192887	10.454	1.40511e-25	1.3864e-23
ENSG00000011426.9	4095.36	2.01273	0.167145	12.0418	2.14199e-33	7.37858e-31
ENSG00000091129.18	944.178	2.01202	0.321543	6.2574	3.9144e-10	3.17275e-09
ENSG00000123171.6	2.00047	2.01095	0.528975	3.80159	0.000143768	0.000428099
ENSG00000174469.16	1202.7	2.00817	0.355344	5.65133	1.59211e-08	9.72656e-08
ENSG00000135451.11	1514.17	2.00733	0.186187	10.7813	4.2208e-27	5.02275e-25
ENSG00000188984.10	2.4261	2.00641	0.740651	2.70899	0.00674888	0.0139474
ENSG00000185448.10	1.69337	2.00431	0.757994	2.64423	0.0081878	0.0166013
ENSG00000240204.2	78.773	2.0043	0.268403	7.46751	8.17279e-14	1.21847e-12
ENSG00000171877.18	521.204	2.00383	0.227155	8.82143	1.13007e-18	3.87919e-17
ENSG00000168542.11	129062	2.00309	0.2313	8.66014	4.71185e-18	1.46388e-16
ENSG00000138778.10	1826.87	2.00271	0.178991	11.1889	4.621e-29	7.62465e-27
ENSG00000122861.14	4555.2	2.00147	0.221179	9.04909	1.44171e-19	5.67292e-18
ENSG00000006659.11	3.51037	1.99457	0.844659	2.36139	0.0182064	0.0337437
ENSG00000261667.1	1.18652	1.99453	0.903089	2.20857	0.0272046	0.0482444
ENSG00000186191.7	9.3732	1.9942	0.558861	3.56834	0.000359252	0.000988914
ENSG00000180264.9	15.4445	1.99236	0.389211	5.11896	3.07225e-07	1.5191e-06
ENSG00000143476.16	1491.29	1.99168	0.166606	11.9544	6.15398e-33	1.98087e-30
ENSG00000226650.5	8.93723	1.99017	0.287415	6.92437	4.37917e-12	4.9502e-11
ENSG00000154143.2	4.44455	1.98738	0.66517	2.98778	0.00281013	0.00636925
ENSG00000075702.15	1155.64	1.987	0.177222	11.2119	3.56365e-29	6.08454e-27
ENSG00000147432.5	3.48973	1.98629	0.608539	3.26403	0.0010984	0.00272724
ENSG00000183145.7	90.3363	1.98608	0.418562	4.74501	2.08499e-06	8.8708e-06
ENSG00000081138.12	12.5354	1.98462	0.497199	3.99159	6.56305e-05	0.000208824
ENSG00000123999.4	46.5692	1.98322	0.440247	4.50479	6.64387e-06	2.571e-05
ENSG00000167104.10	2.2065	1.9832	0.85338	2.32394	0.0201289	0.0368721
ENSG00000138068.9	2.69016	1.98301	0.668482	2.96644	0.0030127	0.00678143
ENSG00000178358.4	1.6056	1.9801	0.558747	3.54381	0.000394384	0.00107517
ENSG00000236699.7	695.435	1.97914	0.219937	8.99868	2.28449e-19	8.693e-18
ENSG00000182898.3	1.98432	1.97706	0.737748	2.67986	0.0073652	0.0150673
ENSG00000100473.14	396.938	1.97698	0.319975	6.17854	6.46955e-10	5.03686e-09
ENSG00000119969.13	1989.27	1.97655	0.155398	12.7193	4.62048e-37	2.66833e-34
ENSG00000196711.7	102.262	1.97649	0.310736	6.36068	2.00861e-10	1.72073e-09
ENSG00000255298.2	4.23889	1.9762	0.767575	2.5746	0.0100357	0.0198922
ENSG00000258947.5	128.775	1.97442	0.259528	7.60775	2.78906e-14	4.51842e-13
ENSG00000156150.6	7.00228	1.97313	0.78726	2.50632	0.0121995	0.0235881
ENSG00000171617.12	7932.02	1.96912	0.167165	11.7795	4.97808e-32	1.35756e-29
ENSG00000176988.7	1.99421	1.96895	0.776224	2.53658	0.0111943	0.0218837
ENSG00000188991.3	1.62248	1.96651	0.747971	2.62913	0.00856034	0.0172764
ENSG00000197506.7	725.577	1.96601	0.302915	6.49031	8.56604e-11	7.8522e-10
ENSG00000090889.11	1525.78	1.96359	0.178963	10.9721	5.20492e-28	7.24813e-26
ENSG00000149043.15	1277.87	1.96286	0.4044	4.85376	1.21141e-06	5.39245e-06
ENSG00000156802.11	3987.17	1.96279	0.153137	12.8172	1.31344e-37	8.05921e-35
ENSG00000166035.9	223.768	1.96203	0.373255	5.25654	1.46793e-07	7.65777e-07
ENSG00000144481.15	19.9841	1.96098	0.369475	5.30747	1.11158e-07	5.91169e-07
ENSG00000160867.13	4852.81	1.9602	0.239349	8.18974	2.618e-16	5.97032e-15
ENSG00000123485.10	1199.73	1.95981	0.185835	10.546	5.30303e-26	5.45157e-24
ENSG00000165480.14	1278.88	1.95899	0.18758	10.4435	1.56877e-25	1.54014e-23
ENSG00000205086.6	14.6707	1.95619	0.391884	4.99176	5.98325e-07	2.81257e-06
ENSG00000182329.9	28.3735	1.95618	0.288207	6.7874	1.14175e-11	1.19564e-10
ENSG00000203972.8	2.79396	1.95501	0.783363	2.49566	0.0125723	0.0242231
ENSG00000147869.4	2.66488	1.95477	0.752732	2.5969	0.00940681	0.0187801
ENSG00000273111.4	8.20961	1.95385	0.514601	3.79683	0.000146558	0.000435352
ENSG00000126545.12	1.79806	1.95373	0.88672	2.20332	0.0275721	0.0487552
ENSG00000158014.13	87.2573	1.95231	0.422193	4.62421	3.76032e-06	1.52204e-05
ENSG00000234511.7	49.4656	1.95159	0.30555	6.38713	1.69023e-10	1.46459e-09
ENSG00000178150.7	76.2979	1.95111	0.336088	5.80534	6.42361e-09	4.1875e-08
ENSG00000133466.12	1151.66	1.9508	0.175777	11.0981	1.2811e-28	1.93495e-26
ENSG00000182631.6	2.5448	1.95038	0.495912	3.93292	8.39196e-05	0.000261591
ENSG00000057593.12	92.1361	1.95023	0.431336	4.52137	6.14412e-06	2.38938e-05
ENSG00000204478.8	2.18682	1.94956	0.743297	2.62285	0.00871983	0.0175705
ENSG00000164744.11	12.7657	1.94895	0.419051	4.65087	3.30535e-06	1.349e-05
ENSG00000170788.12	2.6512	1.94875	0.625001	3.118	0.00182085	0.00431011
ENSG00000146410.10	411.586	1.9487	0.179681	10.8453	2.09892e-27	2.59197e-25
ENSG00000156970.11	1592.79	1.94863	0.177627	10.9704	5.30571e-28	7.33358e-26
ENSG00000113196.2	3.73512	1.94826	0.722709	2.69577	0.00702265	0.0144463
ENSG00000165509.12	2.39048	1.9468	0.798453	2.43821	0.0147601	0.0279879
ENSG00000206262.7	20.0607	1.94571	0.485449	4.00806	6.12184e-05	0.000196057
ENSG00000168959.13	3.77234	1.94569	0.574577	3.3863	0.000708423	0.00183194
ENSG00000233701.3	1.70804	1.94532	0.65083	2.98899	0.00279902	0.00634627
ENSG00000138180.14	2168.04	1.94216	0.176868	10.9808	4.72577e-28	6.74303e-26
ENSG00000170920.2	1.756	1.94183	0.830861	2.33713	0.0194323	0.0357627
ENSG00000276043.3	1584.07	1.9383	0.177514	10.9192	9.33596e-28	1.23859e-25
ENSG00000214940.7	3.50463	1.93762	0.502055	3.85938	0.000113675	0.00034562
ENSG00000129810.13	671.273	1.93656	0.171686	11.2797	1.65368e-29	2.95182e-27
ENSG00000151490.12	391.794	1.93417	0.300569	6.43504	1.23443e-10	1.09724e-09
ENSG00000111247.13	883.216	1.93354	0.166017	11.6466	2.38731e-31	5.71645e-29
ENSG00000138346.13	690.596	1.93316	0.162019	11.9317	8.09412e-33	2.48325e-30
ENSG00000204669.8	4.65821	1.93165	0.534069	3.61685	0.000298208	0.000833734
ENSG00000186603.5	918.202	1.92983	0.245723	7.85369	4.03972e-15	7.66377e-14
ENSG00000168878.15	48.3752	1.92863	0.408486	4.72141	2.3422e-06	9.85408e-06
ENSG00000051341.12	943.228	1.92854	0.192356	10.0259	1.17326e-23	8.56391e-22
ENSG00000259803.5	118.282	1.92733	0.461604	4.17529	2.9761e-05	0.000101345
ENSG00000080618.12	9.86819	1.92705	0.41222	4.6748	2.94237e-06	1.21169e-05
ENSG00000181518.3	1.27625	1.92645	0.826861	2.32984	0.0198147	0.0363746
ENSG00000141738.12	6333.46	1.92638	0.323297	5.95855	2.5449e-09	1.79616e-08
ENSG00000164334.14	2.32163	1.92472	0.569876	3.37743	0.000731655	0.00188655
ENSG00000149243.14	290.231	1.92448	0.265925	7.23693	4.58942e-13	6.08051e-12
ENSG00000109272.3	10.556	1.92422	0.447448	4.30043	1.7047e-05	6.08909e-05
ENSG00000091583.9	82.6132	1.92383	0.46967	4.09612	4.20129e-05	0.000138946
ENSG00000241598.5	10.744	1.9212	0.42996	4.46832	7.88347e-06	3.00275e-05
ENSG00000229972.6	1.11516	1.92014	0.794512	2.41675	0.0156596	0.0295026
ENSG00000135248.14	5.73958	1.91988	0.471219	4.07429	4.6155e-05	0.000151598
ENSG00000127564.15	1600.84	1.91801	0.19462	9.85517	6.51037e-23	4.19118e-21
ENSG00000261210.4	8.82242	1.9149	0.446376	4.28989	1.78762e-05	6.35517e-05
ENSG00000205301.10	3.9163	1.91476	0.67221	2.84845	0.0043933	0.00950131
ENSG00000112337.9	3.38189	1.9147	0.703015	2.72355	0.00645841	0.0134021
ENSG00000183248.10	577.824	1.91402	0.374646	5.10888	3.2407e-07	1.59357e-06
ENSG00000226321.5	26.1124	1.91212	0.389137	4.91376	8.93467e-07	4.06941e-06
ENSG00000056736.8	1568.74	1.91129	0.207913	9.19276	3.82878e-20	1.63076e-18
ENSG00000184845.3	120.548	1.91016	0.406005	4.70476	2.54161e-06	1.0618e-05
ENSG00000185303.14	106.747	1.90939	0.416219	4.58747	4.48646e-06	1.78866e-05
ENSG00000077800.10	4.86732	1.90775	0.489912	3.89405	9.85826e-05	0.000302922
ENSG00000182223.7	6.51738	1.9074	0.549518	3.47104	0.000518453	0.00138313
ENSG00000275385.1	2301.68	1.90722	0.352656	5.40815	6.36798e-08	3.52808e-07
ENSG00000197901.10	4.6705	1.9058	0.637249	2.99067	0.00278369	0.00631371
ENSG00000204694.9	2.94312	1.90479	0.731687	2.60329	0.00923344	0.0184735
ENSG00000136982.5	754.436	1.90462	0.158426	12.0221	2.71863e-33	9.04751e-31
ENSG00000035499.11	1035.93	1.90352	0.187341	10.1607	2.96853e-24	2.37907e-22
ENSG00000188306.6	47.8102	1.90346	0.295492	6.44167	1.18162e-10	1.0555e-09
ENSG00000106689.9	30.7894	1.9016	0.295034	6.44536	1.15327e-10	1.03211e-09
ENSG00000111206.11	4673.96	1.9005	0.185085	10.2682	9.79881e-25	8.47575e-23
ENSG00000105976.13	8899.21	1.90001	0.221024	8.59639	8.22642e-18	2.45107e-16
ENSG00000068650.17	10165.4	1.89693	0.160288	11.8345	2.58943e-32	7.47698e-30
ENSG00000204410.13	393.542	1.89686	0.186299	10.1818	2.39119e-24	1.94818e-22
ENSG00000182346.16	1.98731	1.89295	0.775979	2.43944	0.01471	0.027901
ENSG00000241484.8	273.338	1.8929	0.18532	10.2143	1.71159e-24	1.42403e-22
ENSG00000198088.9	215.806	1.89258	0.248346	7.62075	2.52209e-14	4.12676e-13
ENSG00000101003.9	1284.8	1.89149	0.172165	10.9865	4.43852e-28	6.40811e-26
ENSG00000197757.7	361.697	1.89012	0.26734	7.07009	1.54833e-12	1.87547e-11
ENSG00000188368.8	137.908	1.88947	0.252109	7.49465	6.64763e-14	1.00948e-12
ENSG00000255552.6	3.65286	1.88772	0.651006	2.8997	0.00373515	0.00821732
ENSG00000134588.11	4.13402	1.88517	0.589926	3.1956	0.00139542	0.00338343
ENSG00000148773.11	14600.7	1.88473	0.180708	10.4297	1.81449e-25	1.76374e-23
ENSG00000251655.5	1.88114	1.88365	0.624659	3.01548	0.00256571	0.00587017
ENSG00000162009.8	66.9627	1.88001	0.438523	4.28714	1.80991e-05	6.42633e-05
ENSG00000164488.10	330.234	1.87865	0.492519	3.81437	0.000136533	0.000408289
ENSG00000163347.5	5912.21	1.87823	0.2676	7.01878	2.23822e-12	2.64584e-11
ENSG00000165304.6	1642.63	1.87681	0.183869	10.2073	1.83858e-24	1.52319e-22
ENSG00000124089.4	0.947141	1.87615	0.775245	2.42008	0.0155173	0.0292457
ENSG00000198826.9	2315.52	1.87401	0.161024	11.6381	2.63835e-31	6.09878e-29
ENSG00000171501.8	1.21026	1.87349	0.694525	2.69751	0.0069861	0.0143862
ENSG00000126550.7	3.55308	1.86896	0.729779	2.561	0.0104372	0.0205716
ENSG00000143556.7	359.741	1.86689	0.707261	2.63961	0.00830022	0.0168067
ENSG00000170613.4	2.01484	1.86616	0.846623	2.20424	0.0275073	0.048667
ENSG00000170289.11	27.5342	1.86434	0.339989	5.48354	4.16896e-08	2.37543e-07
ENSG00000165805.8	4.15355	1.86332	0.471232	3.95416	7.68051e-05	0.000241407
ENSG00000186193.8	3276.18	1.86271	0.211458	8.80889	1.26394e-18	4.29367e-17
ENSG00000101194.16	3201.89	1.86261	0.246897	7.54407	4.55511e-14	7.16089e-13
ENSG00000186047.9	69.6979	1.86237	0.166555	11.1817	5.01407e-29	8.20428e-27
ENSG00000115009.10	3798.18	1.86171	0.37015	5.02962	4.91459e-07	2.35361e-06
ENSG00000204193.9	2.4377	1.86122	0.665374	2.79725	0.00515391	0.0109592
ENSG00000163808.15	907.821	1.86011	0.169617	10.9666	5.53372e-28	7.49342e-26
ENSG00000196224.7	1.83502	1.85791	0.651338	2.85246	0.00433829	0.00938959
ENSG00000132972.17	9.1674	1.85783	0.53601	3.46604	0.000528193	0.00140739
ENSG00000186526.11	11.0121	1.8574	0.437813	4.24245	2.21091e-05	7.72853e-05
ENSG00000149452.14	6.26877	1.85679	0.530066	3.50293	0.000460167	0.00123925
ENSG00000280050.1	2.69245	1.85539	0.642208	2.88909	0.00386363	0.00846773
ENSG00000172167.6	506.985	1.85499	0.147096	12.6107	1.84346e-36	1.03418e-33
ENSG00000120254.14	1862.33	1.85249	0.120839	15.3302	4.80476e-53	2.35854e-49
ENSG00000147223.5	6.15105	1.85134	0.39556	4.6803	2.86458e-06	1.18213e-05
ENSG00000213265.7	2.94335	1.85128	0.551525	3.35665	0.000788916	0.0020175
ENSG00000111537.4	51.3837	1.84798	0.360298	5.12905	2.91207e-07	1.44609e-06
ENSG00000142102.14	2629.06	1.84537	0.218559	8.44336	3.08352e-17	8.2374e-16
ENSG00000198829.6	420.026	1.84503	0.310918	5.93415	2.95379e-09	2.05884e-08
ENSG00000140525.16	2834.22	1.84436	0.152137	12.123	7.9765e-34	2.95507e-31
ENSG00000166984.10	16.9282	1.84313	0.471248	3.91116	9.18537e-05	0.000284247
ENSG00000165490.11	647.887	1.8429	0.179359	10.2749	9.14081e-25	7.94158e-23
ENSG00000141485.14	88.1016	1.84191	0.417129	4.41568	1.00693e-05	3.76161e-05
ENSG00000204262.10	13030.1	1.84017	0.196022	9.38753	6.14213e-21	2.93432e-19
ENSG00000153498.10	1.23493	1.84005	0.756614	2.43195	0.0150176	0.0284295
ENSG00000236027.2	2.22423	1.83981	0.655646	2.8061	0.00501452	0.010694
ENSG00000146670.8	1664	1.83865	0.178926	10.276	9.03769e-25	7.88689e-23
ENSG00000183024.3	1.40333	1.83825	0.70612	2.60331	0.00923294	0.0184735
ENSG00000188425.3	2.42123	1.83797	0.646433	2.84326	0.00446551	0.00964366
ENSG00000091651.7	589.8	1.83687	0.173631	10.5792	3.72249e-26	3.90861e-24
ENSG00000182272.10	555.924	1.83676	0.3953	4.6465	3.37618e-06	1.37677e-05
ENSG00000173432.9	2099.46	1.83675	0.452418	4.05985	4.91044e-05	0.000160507
ENSG00000038945.13	1536.31	1.83644	0.218403	8.40849	4.15325e-17	1.09023e-15
ENSG00000087586.16	2490.07	1.83595	0.189848	9.67062	4.01925e-22	2.30082e-20
ENSG00000158555.13	1436.77	1.83571	0.229248	8.00752	1.17048e-15	2.45276e-14
ENSG00000183117.16	86.2944	1.83535	0.458987	3.99869	6.36944e-05	0.000203257
ENSG00000101670.10	1952.68	1.83523	0.2349	7.81283	5.59163e-15	1.03454e-13
ENSG00000171540.7	5.23047	1.83478	0.419876	4.36983	1.24343e-05	4.55161e-05
ENSG00000072571.18	1487.68	1.83253	0.187705	9.76279	1.62617e-22	9.82457e-21
ENSG00000165583.12	2.55819	1.83223	0.668298	2.74163	0.00611349	0.0127524
ENSG00000168078.8	1435.34	1.83156	0.216628	8.45487	2.79409e-17	7.5004e-16
ENSG00000075218.17	1253.94	1.83076	0.177679	10.3037	6.7775e-25	5.96754e-23
ENSG00000258083.1	2.87932	1.82847	0.705864	2.59041	0.00958629	0.019094
ENSG00000279777.1	1.76272	1.82758	0.563396	3.24386	0.00117921	0.00290402
ENSG00000164794.7	16.8016	1.82621	0.590698	3.09161	0.00199072	0.00467054
ENSG00000260220.4	83.1099	1.82538	0.389149	4.6907	2.72272e-06	1.12953e-05
ENSG00000182177.12	5.86146	1.82482	0.516995	3.52967	0.000416076	0.00112841
ENSG00000112742.8	1244.48	1.82407	0.192719	9.46492	2.93795e-21	1.46413e-19
ENSG00000197768.9	20.0595	1.82368	0.301553	6.04762	1.46998e-09	1.07859e-08
ENSG00000111783.11	13.5299	1.82336	0.403769	4.51585	6.30626e-06	2.44759e-05
ENSG00000189433.5	236.118	1.82237	0.35817	5.08799	3.61873e-07	1.76663e-06
ENSG00000279808.1	2.21112	1.82076	0.464119	3.92304	8.74368e-05	0.000271649
ENSG00000112462.8	1.56197	1.82074	0.79959	2.27709	0.0227809	0.0411976
ENSG00000179869.13	249.475	1.82008	0.352189	5.16791	2.36726e-07	1.19336e-06
ENSG00000172023.6	656.788	1.81875	0.689657	2.63718	0.0083598	0.0169169
ENSG00000180697.7	1.9324	1.81857	0.634311	2.867	0.00414379	0.00901733
ENSG00000197299.9	921.075	1.81733	0.175784	10.3384	4.72275e-25	4.25197e-23
ENSG00000167771.5	459.585	1.81477	0.252975	7.17373	7.2982e-13	9.32944e-12
ENSG00000118513.17	1797.07	1.81341	0.254658	7.12096	1.07176e-12	1.33022e-11
ENSG00000196932.10	141.19	1.81338	0.16908	10.725	7.76631e-27	9.02317e-25
ENSG00000105550.7	2.37495	1.81318	0.585567	3.09645	0.00195854	0.00460218
ENSG00000197616.10	8.17312	1.81168	0.472186	3.83679	0.000124653	0.000376086
ENSG00000164692.16	116642	1.81134	0.224077	8.08354	6.29134e-16	1.36197e-14
ENSG00000080986.11	993.637	1.81014	0.166451	10.8749	1.51793e-27	1.91055e-25
ENSG00000100344.9	106.139	1.80966	0.346259	5.22633	1.72909e-07	8.92267e-07
ENSG00000183019.6	67.0349	1.80843	0.319344	5.66296	1.48784e-08	9.14933e-08
ENSG00000105852.9	353.827	1.80843	0.41068	4.40351	1.06512e-05	3.95492e-05
ENSG00000102384.12	416.992	1.80699	0.150572	12.0008	3.51814e-33	1.15131e-30
ENSG00000092758.14	974.728	1.80599	0.401458	4.49857	6.84119e-06	2.64007e-05
ENSG00000161609.8	15.51	1.80357	0.453428	3.97762	6.96086e-05	0.000220517
ENSG00000019505.6	3653.53	1.80336	0.347734	5.18603	2.14823e-07	1.08965e-06
ENSG00000109424.3	2.53562	1.80243	0.49988	3.60572	0.000311283	0.000867819
ENSG00000196460.11	27.4846	1.79833	0.275565	6.526	6.75515e-11	6.30106e-10
ENSG00000139572.3	94.5276	1.79826	0.256805	7.00243	2.51568e-12	2.94021e-11
ENSG00000277363.3	955.451	1.7975	0.278542	6.45323	1.09489e-10	9.84352e-10
ENSG00000170312.14	2957.4	1.79724	0.179475	10.0139	1.32433e-23	9.59531e-22
ENSG00000013588.5	37531.2	1.79715	0.233811	7.68635	1.51394e-14	2.57594e-13
ENSG00000185775.9	1.01866	1.7967	0.804303	2.23386	0.0254923	0.0455772
ENSG00000277632.1	289.507	1.79667	0.274909	6.53551	6.33944e-11	5.93869e-10
ENSG00000122194.17	5.83842	1.79633	0.460696	3.89917	9.65213e-05	0.000297192
ENSG00000148513.16	5.70166	1.79412	0.534203	3.35849	0.000783687	0.00200753
ENSG00000157470.10	569.679	1.794	0.207654	8.63937	5.65224e-18	1.7392e-16
ENSG00000158106.11	1117.43	1.79397	0.187615	9.56198	1.15529e-21	6.06528e-20
ENSG00000148123.13	46.9887	1.79393	0.431154	4.16076	3.17193e-05	0.000107399
ENSG00000095596.10	10.6688	1.79111	0.387533	4.62183	3.80378e-06	1.53583e-05
ENSG00000062038.12	3222.89	1.78839	0.279191	6.4056	1.49777e-10	1.31114e-09
ENSG00000176571.10	4.05172	1.78735	0.661484	2.70204	0.00689165	0.014211
ENSG00000214336.4	4.29278	1.78455	0.553472	3.22429	0.00126285	0.00309292
ENSG00000092607.12	72.7422	1.78447	0.285456	6.25131	4.07031e-10	3.28485e-09
ENSG00000188784.4	2.86465	1.78423	0.611674	2.91695	0.00353468	0.00783687
ENSG00000181544.12	143.295	1.78386	0.16642	10.719	8.2883e-27	9.51701e-25
ENSG00000198915.10	473.361	1.78373	0.276493	6.45124	1.10936e-10	9.96901e-10
ENSG00000144354.12	4191.67	1.78337	0.212406	8.39604	4.61769e-17	1.20091e-15
ENSG00000226887.6	371.295	1.77977	0.349254	5.0959	3.47079e-07	1.6999e-06
ENSG00000143552.8	34.565	1.77877	0.31755	5.60156	2.12428e-08	1.2732e-07
ENSG00000172772.3	2.85468	1.77874	0.627724	2.83364	0.00460213	0.00989952
ENSG00000116785.12	12.7624	1.77825	0.433534	4.10176	4.10028e-05	0.000136041
ENSG00000185056.9	5.07567	1.77716	0.490154	3.62571	0.000288172	0.000807861
ENSG00000158901.10	1.90106	1.77655	0.591045	3.00578	0.00264898	0.00603395
ENSG00000280575.1	2.13615	1.77559	0.43277	4.10285	4.08095e-05	0.000135514
ENSG00000101412.12	1567.72	1.77494	0.167127	10.6203	2.39878e-26	2.60221e-24
ENSG00000105048.15	256.237	1.77463	0.418182	4.24368	2.1988e-05	7.69167e-05
ENSG00000148735.13	2861.95	1.77379	0.308738	5.74528	9.17677e-09	5.86178e-08
ENSG00000136834.3	2.37659	1.77337	0.551525	3.21539	0.00130265	0.0031805
ENSG00000189375.9	1.4642	1.77295	0.595712	2.97619	0.00291856	0.00659219
ENSG00000076382.15	2232.35	1.77087	0.165229	10.7177	8.41046e-27	9.60113e-25
ENSG00000159398.14	6.17411	1.76868	0.535494	3.30289	0.000956941	0.00240675
ENSG00000086300.14	1411.69	1.76832	0.177141	9.98254	1.81754e-23	1.28372e-21
ENSG00000173389.14	2.43449	1.76802	0.544536	3.24684	0.00116693	0.0028774
ENSG00000142945.11	1906.95	1.76628	0.165542	10.6697	1.41088e-26	1.55633e-24
ENSG00000213420.6	68.9438	1.76588	0.26786	6.59255	4.32341e-11	4.14503e-10
ENSG00000165059.6	3.22117	1.76549	0.39401	4.48082	7.43572e-06	2.84556e-05
ENSG00000280188.1	2.89166	1.76539	0.583846	3.02372	0.00249683	0.00573262
ENSG00000122254.6	181.539	1.76526	0.302445	5.83662	5.32701e-09	3.53842e-08
ENSG00000135625.7	79.3879	1.76413	0.37077	4.75802	1.95499e-06	8.3685e-06
ENSG00000139618.13	1339.41	1.76136	0.17644	9.98277	1.81329e-23	1.28372e-21
ENSG00000124766.5	12117.4	1.76111	0.173408	10.1559	3.1201e-24	2.48029e-22
ENSG00000156509.12	36.0001	1.76036	0.246017	7.15544	8.34076e-13	1.05251e-11
ENSG00000164299.6	2.20898	1.75958	0.532802	3.30251	0.000958243	0.00240941
ENSG00000205869.2	44.2463	1.75892	0.248495	7.07828	1.4596e-12	1.77347e-11
ENSG00000085999.10	551.724	1.75684	0.167093	10.5142	7.43399e-26	7.48545e-24
ENSG00000162745.9	2618.23	1.75661	0.231236	7.5966	3.04009e-14	4.88479e-13
ENSG00000164109.12	2009.47	1.75653	0.173515	10.1232	4.35841e-24	3.39593e-22
ENSG00000183560.7	2.82759	1.75369	0.625755	2.80251	0.00507063	0.0108031
ENSG00000164900.4	3.46345	1.75344	0.584811	2.99831	0.00271481	0.00617031
ENSG00000103253.16	467.702	1.75319	0.21503	8.15322	3.54367e-16	7.92482e-15
ENSG00000212993.4	63.9837	1.75041	0.300744	5.82027	5.87523e-09	3.8582e-08
ENSG00000187969.5	1.19937	1.74902	0.796807	2.19504	0.0281609	0.0496578
ENSG00000140675.11	68.4956	1.74543	0.216231	8.07208	6.91103e-16	1.48304e-14
ENSG00000130203.8	17203.4	1.74516	0.275344	6.3381	2.32622e-10	1.96369e-09
ENSG00000154839.8	627.927	1.74513	0.187631	9.30084	1.39345e-20	6.31877e-19
ENSG00000179528.14	127.628	1.74374	0.216003	8.07277	6.87222e-16	1.47956e-14
ENSG00000118849.8	2331.06	1.74371	0.301546	5.78257	7.35689e-09	4.75486e-08
ENSG00000131059.10	1.71698	1.74216	0.7799	2.23383	0.0254943	0.0455772
ENSG00000175820.3	16.5113	1.7418	0.32625	5.33885	9.3537e-08	5.03868e-07
ENSG00000125895.5	383.779	1.74168	0.275268	6.3272	2.49643e-10	2.10015e-09
ENSG00000183960.7	229.478	1.74119	0.32761	5.31484	1.06753e-07	5.69282e-07
ENSG00000145863.9	2.91193	1.73906	0.70074	2.48174	0.0130742	0.0250743
ENSG00000133119.11	1846.6	1.73859	0.153612	11.318	1.06839e-29	1.97904e-27
ENSG00000180777.12	9.13981	1.73846	0.478232	3.63518	0.000277783	0.000780631
ENSG00000171195.9	3.87888	1.73846	0.692251	2.51131	0.0120284	0.0233009
ENSG00000113946.3	63.8233	1.73814	0.29937	5.80599	6.39876e-09	4.17524e-08
ENSG00000126787.11	1427.49	1.73696	0.180366	9.63019	5.96167e-22	3.32549e-20
ENSG00000061492.10	2.55751	1.73628	0.701368	2.47556	0.0133028	0.0254806
ENSG00000163746.10	20.3066	1.73333	0.272517	6.36043	2.01187e-10	1.72277e-09
ENSG00000116014.8	40.2395	1.73325	0.387699	4.47062	7.79946e-06	2.97422e-05
ENSG00000137563.10	2837.27	1.73322	0.256376	6.76048	1.3754e-11	1.42512e-10
ENSG00000162062.13	340.415	1.73005	0.175655	9.8491	6.91613e-23	4.4234e-21
ENSG00000100593.16	42.0318	1.72966	0.499772	3.46089	0.00053839	0.00143107
ENSG00000127423.9	265.153	1.72965	0.170832	10.1248	4.28649e-24	3.3532e-22
ENSG00000169064.11	6.37641	1.72751	0.593358	2.91141	0.00359799	0.00795679
ENSG00000110944.7	153.052	1.7273	0.258191	6.69001	2.23149e-11	2.23433e-10
ENSG00000186897.4	16.5274	1.726	0.45815	3.76732	0.000165009	0.00048524
ENSG00000112984.10	1682.33	1.72489	0.180232	9.57038	1.06518e-21	5.72322e-20
ENSG00000135744.7	3309.89	1.72327	0.308448	5.58689	2.31167e-08	1.37503e-07
ENSG00000162004.15	118.089	1.72172	0.225439	7.63721	2.21984e-14	3.67818e-13
ENSG00000180043.10	1.65042	1.72051	0.687558	2.50235	0.0123373	0.0238202
ENSG00000198901.12	3128.81	1.71939	0.158213	10.8676	1.64532e-27	2.0577e-25
ENSG00000174990.4	15.9708	1.7193	0.354295	4.85273	1.21771e-06	5.41925e-06
ENSG00000168505.6	7.73549	1.71751	0.421873	4.07114	4.67837e-05	0.000153612
ENSG00000152430.16	17.8842	1.71737	0.358832	4.786	1.70142e-06	7.35845e-06
ENSG00000196950.12	1983.92	1.71617	0.148517	11.5554	6.9349e-31	1.48327e-28
ENSG00000134668.11	210.573	1.71486	0.22307	7.68758	1.49948e-14	2.55576e-13
ENSG00000188582.7	3.82607	1.71475	0.590896	2.90195	0.0037085	0.00816786
ENSG00000131650.12	130.793	1.71412	0.281086	6.0982	1.0727e-09	8.06684e-09
ENSG00000163507.12	824.571	1.71326	0.138961	12.3291	6.31641e-35	2.88425e-32
ENSG00000165471.6	1.99639	1.71217	0.714023	2.39791	0.0164887	0.0309253
ENSG00000258830.1	3.28245	1.71162	0.404491	4.23152	2.32113e-05	8.08647e-05
ENSG00000130876.10	41.5185	1.71139	0.53284	3.21183	0.0013189	0.00321605
ENSG00000169607.11	954.888	1.71023	0.170132	10.0524	8.96765e-24	6.66969e-22
ENSG00000204572.7	5.67114	1.71005	0.388986	4.39619	1.10169e-05	4.07376e-05
ENSG00000170537.11	1078.33	1.70865	0.19316	8.8458	9.0872e-19	3.158e-17
ENSG00000112761.17	200.206	1.70779	0.335804	5.08568	3.66303e-07	1.78692e-06
ENSG00000170948.3	1.794	1.70711	0.560235	3.04713	0.00231037	0.00533884
ENSG00000131771.12	12269.5	1.70617	0.399022	4.27588	1.90383e-05	6.73179e-05
ENSG00000162490.6	68.2298	1.70584	0.271002	6.29455	3.08283e-10	2.55407e-09
ENSG00000178217.12	10.6379	1.70554	0.338767	5.03454	4.78995e-07	2.30116e-06
ENSG00000047457.12	1365.54	1.70522	0.379545	4.49281	7.02883e-06	2.70663e-05
ENSG00000125657.4	529.295	1.70485	0.335276	5.0849	3.67825e-07	1.79345e-06
ENSG00000109805.8	1394.88	1.70478	0.183032	9.31411	1.22976e-20	5.65489e-19
ENSG00000183292.11	1.8532	1.70467	0.582129	2.92833	0.00340783	0.00758563
ENSG00000158786.4	135.248	1.70247	0.428156	3.97629	7.00001e-05	0.000221686
ENSG00000123977.8	14.7576	1.70004	0.416335	4.08333	4.4394e-05	0.000146132
ENSG00000157654.16	36.9293	1.69901	0.240006	7.07901	1.45187e-12	1.76516e-11
ENSG00000197487.7	2.87167	1.69563	0.724882	2.33918	0.0193262	0.0355842
ENSG00000151005.4	3.01643	1.69382	0.513464	3.29881	0.00097096	0.00243733
ENSG00000115163.13	579.366	1.69331	0.192058	8.81665	1.17935e-18	4.03425e-17
ENSG00000205212.3	17.1086	1.69164	0.545352	3.10192	0.00192269	0.00452553
ENSG00000183668.16	3.10571	1.69098	0.694354	2.43533	0.014878	0.028187
ENSG00000141756.17	6677.2	1.69082	0.261425	6.46771	9.94983e-11	9.0104e-10
ENSG00000029993.13	2821.94	1.69051	0.170816	9.89667	4.3037e-23	2.82619e-21
ENSG00000140678.15	1616.85	1.69041	0.199576	8.47004	2.45314e-17	6.65295e-16
ENSG00000009709.10	4.66276	1.6902	0.584623	2.8911	0.00383902	0.00841567
ENSG00000070985.12	88.764	1.69019	0.360517	4.68822	2.75586e-06	1.14159e-05
ENSG00000167098.10	2.41755	1.6876	0.768698	2.19541	0.0281345	0.049621
ENSG00000152977.8	27.1494	1.68655	0.587639	2.87004	0.00410423	0.00894114
ENSG00000186871.6	422.128	1.68594	0.176156	9.57074	1.0614e-21	5.72322e-20
ENSG00000187741.13	1651.86	1.68557	0.158835	10.6121	2.61754e-26	2.82393e-24
ENSG00000182600.8	553.833	1.68537	0.28429	5.92835	3.05996e-09	2.12907e-08
ENSG00000081800.7	5.93203	1.6843	0.651993	2.58331	0.00978563	0.0194418
ENSG00000073792.14	3967.46	1.68317	0.201593	8.34935	6.8641e-17	1.72349e-15
ENSG00000109061.9	9.6141	1.68269	0.499409	3.36937	0.000753414	0.00193756
ENSG00000147647.11	10.5292	1.68014	0.414851	4.04998	5.12221e-05	0.000166708
ENSG00000165171.9	342.779	1.67949	0.268679	6.25093	4.08021e-10	3.29149e-09
ENSG00000143006.7	2.83855	1.67936	0.671897	2.49943	0.0124393	0.0240022
ENSG00000171060.9	17.9	1.67589	0.399974	4.18999	2.78965e-05	9.57435e-05
ENSG00000158639.10	10.8776	1.67582	0.605523	2.76756	0.00564781	0.0118896
ENSG00000196427.12	9.13394	1.67448	0.525246	3.18798	0.00143269	0.00346481
ENSG00000093009.8	866.781	1.67336	0.181056	9.24224	2.41385e-20	1.05091e-18
ENSG00000197430.9	2.8751	1.67252	0.666194	2.51056	0.0120539	0.0233424
ENSG00000185842.13	322.837	1.67111	0.279295	5.98332	2.18638e-09	1.55937e-08
ENSG00000137812.18	1827.02	1.6692	0.174727	9.5532	1.2575e-21	6.53203e-20
ENSG00000170703.14	294.422	1.6674	0.331269	5.03338	4.81905e-07	2.31237e-06
ENSG00000135917.12	962.214	1.66699	0.386486	4.3132	1.60905e-05	5.78006e-05
ENSG00000169402.14	5.4716	1.66693	0.385761	4.32113	1.55231e-05	5.58891e-05
ENSG00000157388.12	684.628	1.66619	0.232596	7.16345	7.86735e-13	9.97903e-12
ENSG00000101825.7	16403.8	1.66567	0.211363	7.8806	3.25809e-15	6.30273e-14
ENSG00000097046.11	682.372	1.66469	0.157738	10.5535	4.89383e-26	5.08415e-24
ENSG00000164220.6	1286.15	1.66434	0.230243	7.22864	4.87871e-13	6.43341e-12
ENSG00000273079.3	95.7984	1.66351	0.389775	4.26788	1.97343e-05	6.9666e-05
ENSG00000125508.3	313.605	1.66225	0.286598	5.79994	6.63395e-09	4.32032e-08
ENSG00000180914.9	185.103	1.66212	0.24783	6.70669	1.99083e-11	2.00976e-10
ENSG00000115718.16	268.977	1.6612	0.330595	5.02489	5.03733e-07	2.40652e-06
ENSG00000152192.7	19.3759	1.66074	0.537663	3.08881	0.00200958	0.00471142
ENSG00000121152.8	1281.76	1.65954	0.175694	9.44559	3.53422e-21	1.73921e-19
ENSG00000187951.9	636.36	1.65927	0.155859	10.646	1.82077e-26	1.98616e-24
ENSG00000188157.12	23919.6	1.65801	0.15962	10.3872	2.83562e-25	2.65131e-23
ENSG00000024526.15	1191.82	1.65548	0.191095	8.66311	4.59055e-18	1.43072e-16
ENSG00000099985.3	248.337	1.65515	0.311532	5.31292	1.07883e-07	5.74686e-07
ENSG00000130427.2	4.97872	1.65474	0.424506	3.89805	9.69723e-05	0.00029844
ENSG00000188211.7	1103.48	1.6544	0.220423	7.50557	6.11625e-14	9.38224e-13
ENSG00000204889.9	26.5359	1.65397	0.573487	2.88405	0.00392591	0.00859354
ENSG00000183072.9	45.081	1.65328	0.477316	3.46369	0.000532815	0.00141817
ENSG00000142609.16	58.6577	1.65312	0.349757	4.72647	2.28458e-06	9.64268e-06
ENSG00000147536.10	507.598	1.65255	0.163273	10.1214	4.44097e-24	3.43301e-22
ENSG00000065371.16	2.44707	1.65227	0.57982	2.84962	0.00437709	0.0094673
ENSG00000094755.15	5909.48	1.65047	0.442191	3.73248	0.000189606	0.000550565
ENSG00000124818.13	2.00405	1.64964	0.613732	2.68788	0.00719076	0.0147581
ENSG00000111110.10	2373.39	1.64956	0.196987	8.37397	5.57107e-17	1.42062e-15
ENSG00000113763.9	292.114	1.64937	0.392218	4.20525	2.60795e-05	9.00265e-05
ENSG00000136492.7	687.238	1.64897	0.161217	10.2283	1.48133e-24	1.2537e-22
ENSG00000278023.3	87.1862	1.64888	0.220883	7.46494	8.33406e-14	1.23969e-12
ENSG00000166220.11	3.91759	1.64856	0.463792	3.55454	0.000378647	0.0010362
ENSG00000203690.10	18.0996	1.64806	0.508377	3.2418	0.00118777	0.00292327
ENSG00000170324.18	7.8254	1.64776	0.46657	3.53164	0.000412997	0.00112067
ENSG00000125398.5	15654.4	1.64719	0.17637	9.33939	9.6893e-21	4.47773e-19
ENSG00000136295.13	14797.3	1.64661	0.166807	9.87136	5.54073e-23	3.5905e-21
ENSG00000162399.6	3.40126	1.64602	0.527663	3.11946	0.00181186	0.00429193
ENSG00000137976.7	19.3271	1.64584	0.368658	4.4644	8.02934e-06	3.0536e-05
ENSG00000171208.8	774.088	1.64532	0.259349	6.34405	2.23804e-10	1.89332e-09
ENSG00000026036.19	403.852	1.64483	0.184459	8.91707	4.78803e-19	1.70623e-17
ENSG00000171054.7	0.953884	1.64391	0.624403	2.63277	0.00846922	0.0171101
ENSG00000140534.12	1164.59	1.64232	0.188693	8.70369	3.21262e-18	1.0324e-16
ENSG00000124249.6	583.551	1.64228	0.373137	4.40129	1.07611e-05	3.99047e-05
ENSG00000130561.15	15.0081	1.64146	0.348828	4.70565	2.5306e-06	1.05787e-05
ENSG00000120149.8	1015.63	1.64041	0.266754	6.14953	7.7715e-10	5.9537e-09
ENSG00000110427.13	455.911	1.63982	0.336272	4.87648	1.07998e-06	4.85582e-06
ENSG00000173610.10	2.99802	1.63967	0.61173	2.68039	0.00735374	0.0150496
ENSG00000198028.3	4.64063	1.63733	0.559057	2.92874	0.0034034	0.00757748
ENSG00000018280.15	801.313	1.63699	0.227624	7.19165	6.40142e-13	8.24209e-12
ENSG00000121904.16	250.168	1.63554	0.246621	6.63178	3.3167e-11	3.22873e-10
ENSG00000172244.7	263.333	1.6352	0.160017	10.2189	1.63152e-24	1.36319e-22
ENSG00000178997.10	9.39558	1.63483	0.424136	3.85449	0.000115972	0.000352004
ENSG00000177602.5	446.139	1.63289	0.175782	9.2893	1.55301e-20	6.99389e-19
ENSG00000156096.11	7.39739	1.63242	0.582962	2.80022	0.00510676	0.0108683
ENSG00000167618.8	66.5834	1.629	0.342593	4.7549	1.98546e-06	8.49152e-06
ENSG00000125531.6	73.3367	1.62845	0.263843	6.17205	6.74089e-10	5.22738e-09
ENSG00000104237.6	17.9605	1.62836	0.439748	3.70293	0.00021312	0.00061268
ENSG00000130711.3	14.2987	1.62781	0.26544	6.13248	8.65222e-10	6.58474e-09
ENSG00000105697.6	61.6829	1.62754	0.301514	5.39788	6.7434e-08	3.70991e-07
ENSG00000112246.8	3.33956	1.62692	0.559763	2.90644	0.00365568	0.008066
ENSG00000153157.11	36.7125	1.62563	0.358207	4.53823	5.67292e-06	2.21977e-05
ENSG00000091879.12	939.034	1.62233	0.172953	9.38014	6.58833e-21	3.13225e-19
ENSG00000057468.6	22.5502	1.62156	0.331763	4.88771	1.02017e-06	4.60592e-06
ENSG00000196917.5	249.999	1.6211	0.3643	4.4499	8.59105e-06	3.2502e-05
ENSG00000075461.5	406.676	1.62053	0.440638	3.67768	0.000235361	0.000671603
ENSG00000137948.17	19.791	1.62045	0.432582	3.746	0.000179676	0.000524132
ENSG00000167751.11	10.6325	1.62026	0.4193	3.8642	0.000111452	0.000339333
ENSG00000085840.11	671.879	1.62013	0.176249	9.19229	3.84549e-20	1.63433e-18
ENSG00000187616.4	1.48991	1.61992	0.699414	2.31611	0.0205523	0.0375739
ENSG00000077152.8	1354.06	1.61913	0.168383	9.61574	6.86119e-22	3.78426e-20
ENSG00000165685.7	68.5045	1.61884	0.233367	6.93687	4.0089e-12	4.56468e-11
ENSG00000188086.11	14.8232	1.6181	0.533745	3.03159	0.00243271	0.00559914
ENSG00000278939.1	5.38179	1.61586	0.324578	4.97834	6.41304e-07	3.00167e-06
ENSG00000165434.7	1746.43	1.61377	0.141094	11.4376	2.71309e-30	5.43588e-28
ENSG00000145103.11	703.591	1.61367	0.210729	7.65756	1.89498e-14	3.17474e-13
ENSG00000140511.10	1089.14	1.61345	0.208972	7.72089	1.15522e-14	2.00732e-13
ENSG00000137090.10	6.83142	1.61312	0.527443	3.05838	0.00222541	0.00516134
ENSG00000147614.3	109.174	1.61308	0.308872	5.2225	1.76526e-07	9.09737e-07
ENSG00000118557.14	125.936	1.61233	0.256863	6.27702	3.45125e-10	2.82945e-09
ENSG00000113739.9	614.122	1.61165	0.234481	6.87327	6.27445e-12	6.89032e-11
ENSG00000161905.11	86.6677	1.61066	0.394335	4.08449	4.41736e-05	0.00014548
ENSG00000109072.12	509.006	1.61037	0.414594	3.88422	0.00010266	0.000314368
ENSG00000273170.4	14.0984	1.60971	0.396684	4.05792	4.95111e-05	0.000161648
ENSG00000082684.13	201.274	1.60932	0.207548	7.754	8.9042e-15	1.59085e-13
ENSG00000113905.4	5.93392	1.6093	0.447472	3.59643	0.000322611	0.000896726
ENSG00000168131.4	2.27857	1.6091	0.549777	2.92682	0.00342444	0.00762
ENSG00000274641.1	32.1691	1.60736	0.294301	5.46163	4.71783e-08	2.67113e-07
ENSG00000149295.12	55.8831	1.60729	0.438341	3.66676	0.000245642	0.0006979
ENSG00000186854.9	1579.84	1.6057	0.296307	5.41905	5.99152e-08	3.33551e-07
ENSG00000187569.2	9.97466	1.60365	0.635253	2.52443	0.0115886	0.022567
ENSG00000162598.12	4.71067	1.6025	0.569439	2.81417	0.0048904	0.0104611
ENSG00000120322.3	142.915	1.60228	0.342306	4.68082	2.85725e-06	1.17961e-05
ENSG00000144554.9	1299.87	1.60203	0.147799	10.8393	2.24273e-27	2.73515e-25
ENSG00000232237.3	30.6818	1.60023	0.32067	4.99026	6.02973e-07	2.83171e-06
ENSG00000197658.8	1.77093	1.59974	0.7029	2.27592	0.0228509	0.0413071
ENSG00000147596.3	5.11574	1.59871	0.507173	3.1522	0.00162045	0.0038764
ENSG00000168993.13	683.48	1.59871	0.246862	6.47612	9.41139e-11	8.57108e-10
ENSG00000229415.8	4.5267	1.59835	0.681707	2.34463	0.0190462	0.0351444
ENSG00000196859.6	7.13896	1.59544	0.468408	3.4061	0.000658971	0.00171717
ENSG00000170927.13	190.287	1.59239	0.362006	4.39881	1.08846e-05	4.03092e-05
ENSG00000174844.13	72.6197	1.5879	0.299925	5.29432	1.19461e-07	6.32584e-07
ENSG00000151360.8	7.56482	1.58786	0.484353	3.27832	0.00104428	0.00260804
ENSG00000068489.11	2002.71	1.58539	0.151502	10.4645	1.25733e-25	1.25318e-23
ENSG00000006116.3	2.71669	1.584	0.603123	2.62633	0.00863098	0.0174047
ENSG00000169393.7	3.57372	1.58398	0.700434	2.26143	0.0237328	0.0427203
ENSG00000038427.14	12168	1.58029	0.211793	7.46147	8.55629e-14	1.26986e-12
ENSG00000119547.5	5127.16	1.58002	0.31848	4.96112	7.00868e-07	3.25178e-06
ENSG00000163554.10	15.6331	1.57934	0.378485	4.1728	3.00884e-05	0.000102371
ENSG00000164076.15	29.9065	1.5782	0.426165	3.70326	0.000212843	0.000612065
ENSG00000180113.14	166.565	1.57797	0.218619	7.2179	5.27948e-13	6.89704e-12
ENSG00000132911.4	331.619	1.57543	0.504383	3.12348	0.00178727	0.00423829
ENSG00000188322.4	601.062	1.57281	0.308871	5.09212	3.54086e-07	1.73119e-06
ENSG00000137809.15	2800	1.57263	0.238493	6.59403	4.2804e-11	4.10781e-10
ENSG00000205922.4	1926.44	1.57261	0.45028	3.49251	0.000478509	0.0012839
ENSG00000184933.4	0.804093	1.57166	0.618896	2.53946	0.0111023	0.0217234
ENSG00000240563.1	32.3635	1.57119	0.345834	4.5432	5.54065e-06	2.17321e-05
ENSG00000227059.5	3.82868	1.57106	0.673864	2.33142	0.0197314	0.0362352
ENSG00000134940.12	27.7111	1.57063	0.223269	7.03468	1.99712e-12	2.37657e-11
ENSG00000257017.7	69.6889	1.57037	0.420396	3.73547	0.000187365	0.000544621
ENSG00000134343.11	48.8995	1.5696	0.404625	3.87915	0.000104824	0.000320394
ENSG00000136541.13	66.1745	1.56933	0.258136	6.07948	1.20575e-09	8.9678e-09
ENSG00000196296.12	132.052	1.56895	0.196899	7.96828	1.60904e-15	3.3117e-14
ENSG00000142185.15	1086.43	1.56774	0.182471	8.59175	8.56512e-18	2.54812e-16
ENSG00000189269.11	19.6153	1.5674	0.265683	5.8995	3.64605e-09	2.49791e-08
ENSG00000181013.3	5.94985	1.56626	0.328033	4.7747	1.79974e-06	7.74785e-06
ENSG00000158486.12	178.828	1.56534	0.23557	6.6449	3.03433e-11	2.97895e-10
ENSG00000279530.1	25.0893	1.56461	0.252651	6.19275	5.91248e-10	4.63995e-09
ENSG00000269526.1	6.94607	1.56448	0.501473	3.11976	0.00180999	0.00428905
ENSG00000169783.11	607.362	1.56349	0.251814	6.20889	5.33587e-10	4.22971e-09
ENSG00000163535.16	831.79	1.56285	0.154393	10.1226	4.38719e-24	3.40484e-22
ENSG00000275410.3	2255.89	1.56264	0.264129	5.91619	3.29481e-09	2.28036e-08
ENSG00000197275.11	271.97	1.56231	0.157302	9.93191	3.02398e-23	2.04745e-21
ENSG00000004809.12	9.9411	1.56226	0.358936	4.35248	1.34605e-05	4.89894e-05
ENSG00000178928.7	1.69091	1.56192	0.643458	2.42738	0.0152085	0.0287409
ENSG00000176198.2	1.25238	1.56178	0.655724	2.38176	0.0172301	0.0321652
ENSG00000160949.15	2842.98	1.56142	0.159685	9.77812	1.39779e-22	8.49708e-21
ENSG00000129195.14	454.284	1.56069	0.181849	8.58237	9.29385e-18	2.72365e-16
ENSG00000112877.7	660.328	1.55857	0.18167	8.57911	9.56105e-18	2.7812e-16
ENSG00000009950.14	1578.82	1.55753	0.356207	4.37255	1.22805e-05	4.50336e-05
ENSG00000243130.6	3.63498	1.55708	0.676896	2.30033	0.0214295	0.0390142
ENSG00000150676.11	7.09512	1.5566	0.419073	3.7144	0.000203688	0.000588236
ENSG00000205864.1	1.28592	1.5562	0.562394	2.76711	0.0056556	0.0119048
ENSG00000130948.8	30.751	1.55597	0.290408	5.35787	8.42091e-08	4.56879e-07
ENSG00000126231.12	19.7905	1.55485	0.30327	5.12697	2.94446e-07	1.46144e-06
ENSG00000147434.7	14.7354	1.55476	0.295835	5.2555	1.47622e-07	7.69561e-07
ENSG00000255071.2	50.8105	1.55473	0.567216	2.74098	0.0061256	0.0127741
ENSG00000141696.11	2702.56	1.55456	0.212844	7.30375	2.7985e-13	3.83451e-12
ENSG00000119042.15	862.742	1.55374	0.226641	6.8555	7.10647e-12	7.71767e-11
ENSG00000181418.7	57.5811	1.55349	0.338967	4.58303	4.58287e-06	1.82229e-05
ENSG00000125816.4	1.17449	1.55309	0.599278	2.5916	0.00955314	0.0190413
ENSG00000226430.5	1.62742	1.55171	0.592319	2.61972	0.00880022	0.017715
ENSG00000164045.10	698.113	1.54737	0.185799	8.32822	8.2067e-17	2.02945e-15
ENSG00000168070.10	14.2353	1.54654	0.408609	3.78488	0.00015378	0.000455013
ENSG00000204767.3	19.1277	1.54567	0.288672	5.3544	8.58396e-08	4.6525e-07
ENSG00000105392.14	20.0595	1.54469	0.382367	4.0398	5.34958e-05	0.00017336
ENSG00000235034.5	27.3908	1.5445	0.424743	3.63631	0.000276567	0.00077777
ENSG00000138160.5	2940.99	1.54365	0.15543	9.93149	3.03671e-23	2.04899e-21
ENSG00000168594.14	4.93934	1.54353	0.503433	3.06601	0.00216934	0.00504142
ENSG00000142731.9	893.743	1.54115	0.153407	10.0462	9.55182e-24	7.07736e-22
ENSG00000112280.14	330.272	1.54069	0.318932	4.83078	1.35998e-06	5.97786e-06
ENSG00000073111.12	4125.09	1.54062	0.153386	10.0441	9.75159e-24	7.19821e-22
ENSG00000006634.6	1439.64	1.53946	0.149351	10.3077	6.50467e-25	5.75312e-23
ENSG00000180259.8	2.98673	1.53825	0.659556	2.33226	0.0196871	0.0361639
ENSG00000166851.13	3878.3	1.53823	0.177461	8.66797	4.39885e-18	1.37974e-16
ENSG00000184445.10	2402.21	1.53693	0.132751	11.5776	5.35443e-31	1.16816e-28
ENSG00000159625.13	20.6177	1.53642	0.381698	4.02522	5.69228e-05	0.000183106
ENSG00000278677.1	29.9387	1.53317	0.249607	6.14235	8.13104e-10	6.20735e-09
ENSG00000157399.13	1373.28	1.53243	0.274494	5.58276	2.36727e-08	1.40512e-07
ENSG00000198610.9	140.283	1.53138	0.393629	3.89042	0.000100073	0.000307212
ENSG00000039139.9	240.152	1.53091	0.265643	5.76304	8.26127e-09	5.31836e-08
ENSG00000142515.13	16.0522	1.53048	0.444984	3.43941	0.000582982	0.00153835
ENSG00000138207.11	1229.9	1.53037	0.421751	3.62861	0.000284947	0.000798935
ENSG00000206181.5	3.40873	1.52974	0.458311	3.33778	0.000844501	0.00214707
ENSG00000275722.3	1.78627	1.52781	0.642982	2.37613	0.0174951	0.0325916
ENSG00000144810.14	4524.56	1.52768	0.273094	5.59396	2.21948e-08	1.325e-07
ENSG00000180537.11	59.9733	1.52626	0.427085	3.57368	0.000352004	0.000970458
ENSG00000155530.2	44.4437	1.52585	0.237509	6.42437	1.32417e-10	1.16854e-09
ENSG00000197748.11	95.721	1.52542	0.222849	6.84509	7.64292e-12	8.2546e-11
ENSG00000174939.9	1086.38	1.52451	0.276839	5.50684	3.65328e-08	2.10235e-07
ENSG00000182545.6	5.2545	1.52343	0.388516	3.92116	8.81227e-05	0.000273434
ENSG00000172967.7	2.58435	1.5206	0.530591	2.86587	0.00415869	0.00904573
ENSG00000108375.11	4363.7	1.51994	0.265766	5.71911	1.07084e-08	6.74342e-08
ENSG00000139797.7	8.61593	1.51832	0.324265	4.68235	2.83601e-06	1.17158e-05
ENSG00000254706.2	5.76995	1.51819	0.427845	3.54845	0.000387505	0.00105838
ENSG00000197753.8	18.4757	1.51644	0.356944	4.24841	2.15289e-05	7.54856e-05
ENSG00000203805.9	113.516	1.51583	0.363422	4.17098	3.03289e-05	0.000103136
ENSG00000163888.3	143.518	1.51577	0.351282	4.31497	1.59622e-05	5.73816e-05
ENSG00000131188.10	967.508	1.51432	0.184415	8.21149	2.18462e-16	5.06435e-15
ENSG00000135902.8	6.24254	1.51417	0.44612	3.39408	0.000688599	0.00178583
ENSG00000174963.16	12.6201	1.5127	0.603468	2.50668	0.012187	0.0235732
ENSG00000130475.13	1114.77	1.51182	0.202308	7.4729	7.84473e-14	1.17581e-12
ENSG00000167550.9	76.5126	1.51118	0.190391	7.93726	2.06696e-15	4.16255e-14
ENSG00000260903.2	52.0064	1.51045	0.48858	3.09151	0.00199142	0.00467123
ENSG00000275465.3	5.15857	1.5101	0.550995	2.74067	0.00613141	0.012783
ENSG00000111602.10	2654.91	1.50994	0.138696	10.8867	1.3334e-27	1.70008e-25
ENSG00000131864.9	3.45253	1.50934	0.684497	2.20503	0.0274517	0.0485818
ENSG00000182931.8	9.16954	1.50814	0.42311	3.56443	0.000364653	0.00100209
ENSG00000176208.7	867.041	1.50684	0.126149	11.9449	6.90328e-33	2.18623e-30
ENSG00000214872.7	45.8642	1.50665	0.249083	6.04878	1.45947e-09	1.07208e-08
ENSG00000177138.14	4.09881	1.50646	0.531385	2.83497	0.00458296	0.00986152
ENSG00000188282.11	48.3832	1.50634	0.291964	5.15933	2.47836e-07	1.24425e-06
ENSG00000105810.8	7513.17	1.50571	0.222556	6.76554	1.32816e-11	1.37763e-10
ENSG00000188257.9	22177.4	1.50562	0.469575	3.20634	0.00134436	0.00327214
ENSG00000086991.11	211.092	1.50543	0.225372	6.67976	2.3933e-11	2.38661e-10
ENSG00000136108.13	3111.24	1.50492	0.157251	9.57013	1.06775e-21	5.72322e-20
ENSG00000160932.9	26133.7	1.50378	0.210723	7.13627	9.58982e-13	1.19857e-11
ENSG00000197905.7	1594.91	1.50347	0.141899	10.5953	3.13262e-26	3.32481e-24
ENSG00000149554.11	1382.05	1.50238	0.137868	10.8973	1.18734e-27	1.54394e-25
ENSG00000139547.7	59.6955	1.50186	0.304979	4.92446	8.45948e-07	3.87094e-06
ENSG00000101311.14	7720.11	1.50138	0.209458	7.1679	7.61551e-13	9.68462e-12
ENSG00000185958.8	39.9743	1.50063	0.248983	6.02703	1.66998e-09	1.2149e-08
ENSG00000091127.12	1641.64	1.50041	0.152739	9.82332	8.93516e-23	5.58732e-21
ENSG00000087495.15	185.757	1.50031	0.393504	3.81269	0.000137463	0.000410821
ENSG00000089101.16	26.1798	1.50013	0.277164	5.41244	6.21707e-08	3.4552e-07
ENSG00000155026.15	8.07963	1.49938	0.293758	5.10414	3.32296e-07	1.63116e-06
ENSG00000170925.3	1.34178	1.49849	0.658158	2.2768	0.0227983	0.0412233
ENSG00000204683.9	2.75463	1.49828	0.542677	2.7609	0.0057642	0.0121035
ENSG00000281370.1	11.2976	1.49768	0.330848	4.52679	5.98871e-06	2.3331e-05
ENSG00000176635.16	4.38181	1.49702	0.605946	2.47054	0.0134908	0.0258103
ENSG00000158553.4	6.64402	1.49663	0.483946	3.09257	0.00198434	0.00465614
ENSG00000101224.16	7967.71	1.49603	0.173425	8.62636	6.33379e-18	1.93112e-16
ENSG00000183396.3	5.94367	1.49571	0.338227	4.42221	9.76967e-06	3.65525e-05
ENSG00000102387.14	18.2571	1.49441	0.36412	4.10416	4.05779e-05	0.000134813
ENSG00000116882.13	5.90098	1.49404	0.443888	3.36581	0.000763205	0.00195966
ENSG00000125888.13	7.75223	1.49203	0.555165	2.68754	0.00719803	0.0147688
ENSG00000196890.4	62.3103	1.49144	0.287114	5.1946	2.05165e-07	1.04282e-06
ENSG00000196800.5	2.72034	1.49092	0.55384	2.69198	0.00710301	0.0145933
ENSG00000160963.12	33.3642	1.48977	0.374842	3.97438	7.05617e-05	0.00022332
ENSG00000060656.18	3244.72	1.48951	0.248502	5.99397	2.04785e-09	1.46911e-08
ENSG00000124557.11	46.7924	1.48932	0.355316	4.19154	2.77064e-05	9.51742e-05
ENSG00000168062.8	1557.86	1.48928	0.248158	6.00133	1.95708e-09	1.40914e-08
ENSG00000162063.11	1748.57	1.48764	0.156312	9.51715	1.77985e-21	9.05372e-20
ENSG00000073464.10	951.067	1.48642	0.238337	6.23663	4.47084e-10	3.58452e-09
ENSG00000147799.10	1476.79	1.48575	0.158812	9.3554	8.32858e-21	3.88436e-19
ENSG00000121594.10	103.796	1.48523	0.233053	6.37295	1.85428e-10	1.59688e-09
ENSG00000204165.5	37.4738	1.48496	0.268492	5.53076	3.18853e-08	1.85173e-07
ENSG00000164363.9	5.44463	1.48411	0.528669	2.80725	0.00499667	0.0106606
ENSG00000279219.1	0.872821	1.48395	0.625321	2.3731	0.0176395	0.032814
ENSG00000166569.7	2.22267	1.48383	0.550469	2.69558	0.00702655	0.0144513
ENSG00000126856.12	4.06827	1.48182	0.428774	3.45595	0.000548356	0.001455
ENSG00000158402.17	460.333	1.48142	0.182974	8.09632	5.66469e-16	1.23174e-14
ENSG00000217442.3	16.0529	1.48032	0.303346	4.87996	1.06108e-06	4.77743e-06
ENSG00000127530.2	1.30382	1.47963	0.635119	2.32968	0.0198228	0.036386
ENSG00000115194.9	41.5202	1.47961	0.382769	3.86555	0.000110838	0.000337622
ENSG00000160505.14	17.7566	1.47882	0.504226	2.93284	0.00335875	0.00748655
ENSG00000078081.6	1278.31	1.47849	0.234848	6.29553	3.0635e-10	2.5402e-09
ENSG00000051180.15	689.629	1.47719	0.146728	10.0675	7.69005e-24	5.74122e-22
ENSG00000198019.11	39.2046	1.47659	0.239296	6.17057	6.80449e-10	5.27046e-09
ENSG00000138798.10	49.3603	1.47542	0.461948	3.1939	0.00140363	0.00339999
ENSG00000169427.5	114.955	1.47407	0.345065	4.27187	1.93841e-05	6.84915e-05
ENSG00000166803.9	1942.97	1.47317	0.18727	7.86658	3.64468e-15	6.98179e-14
ENSG00000157999.5	42.5203	1.47182	0.172394	8.53751	1.37141e-17	3.89127e-16
ENSG00000168509.16	3.6557	1.47149	0.468278	3.14234	0.00167605	0.00399723
ENSG00000158164.6	25.1616	1.47143	0.285661	5.15096	2.59153e-07	1.29676e-06
ENSG00000029534.18	689.069	1.47066	0.319403	4.60439	4.13667e-06	1.65898e-05
ENSG00000100625.8	419.586	1.47008	0.242493	6.06235	1.34151e-09	9.92484e-09
ENSG00000154096.12	7270.13	1.46961	0.198534	7.40228	1.33861e-13	1.93547e-12
ENSG00000139998.13	2582.69	1.46958	0.199161	7.37885	1.59659e-13	2.27332e-12
ENSG00000188483.7	2511.29	1.46931	0.196139	7.49115	6.82727e-14	1.03436e-12
ENSG00000165244.6	973.332	1.46699	0.143551	10.2193	1.62468e-24	1.36319e-22
ENSG00000180919.3	3.02669	1.46647	0.433792	3.38058	0.000723331	0.00186729
ENSG00000129951.17	22.0302	1.46438	0.361378	4.05222	5.07348e-05	0.000165341
ENSG00000249319.2	6.21197	1.4638	0.327336	4.47184	7.7549e-06	2.9595e-05
ENSG00000204779.2	1.53277	1.46102	0.530221	2.75549	0.00586049	0.012286
ENSG00000171403.8	10.3326	1.46032	0.470415	3.10433	0.00190711	0.00449372
ENSG00000112655.14	5121.35	1.46027	0.230645	6.33124	2.43204e-10	2.05125e-09
ENSG00000183150.6	72.7798	1.45878	0.211299	6.90389	5.05958e-12	5.65423e-11
ENSG00000150873.10	28.5696	1.45835	0.271935	5.36285	8.19189e-08	4.45315e-07
ENSG00000167619.10	77.0685	1.45712	0.303982	4.79345	1.63938e-06	7.10892e-06
ENSG00000159708.16	64.2769	1.4568	0.260669	5.58871	2.28766e-08	1.36198e-07
ENSG00000159650.7	5.63865	1.4568	0.440018	3.31077	0.000930412	0.00234557
ENSG00000136531.12	154.545	1.45619	0.417671	3.48644	0.000489496	0.00131122
ENSG00000164430.14	1088.27	1.45611	0.142659	10.2069	1.84629e-24	1.52319e-22
ENSG00000271698.1	5.36952	1.45564	0.320864	4.53661	5.71651e-06	2.23371e-05
ENSG00000170959.13	24.6213	1.45549	0.339069	4.29262	1.76578e-05	6.28327e-05
ENSG00000178795.8	14.1435	1.45535	0.313408	4.64362	3.42352e-06	1.39491e-05
ENSG00000181104.6	4953.67	1.45533	0.160945	9.04237	1.53306e-19	6.02034e-18
ENSG00000088836.11	1350.35	1.45413	0.279417	5.20416	1.94875e-07	9.96375e-07
ENSG00000158023.8	232.219	1.45392	0.237962	6.10988	9.97051e-10	7.53255e-09
ENSG00000279238.1	6.71562	1.45351	0.290559	5.00244	5.66092e-07	2.67257e-06
ENSG00000127586.15	1235.03	1.45349	0.150947	9.62914	6.02338e-22	3.3504e-20
ENSG00000163440.9	4.38623	1.45327	0.547315	2.65527	0.00792455	0.0161092
ENSG00000142449.11	54.4403	1.45269	0.426152	3.40886	0.000652346	0.00170217
ENSG00000171241.7	714.977	1.45225	0.156284	9.29239	1.50862e-20	6.80961e-19
ENSG00000184949.14	159.304	1.45221	0.200333	7.24896	4.1998e-13	5.60211e-12
ENSG00000167513.7	2136.39	1.45208	0.193602	7.50033	6.36573e-14	9.72693e-13
ENSG00000162073.12	1834.45	1.45194	0.173349	8.37581	5.48459e-17	1.40587e-15
ENSG00000159261.9	43.2499	1.45003	0.268558	5.39931	6.68972e-08	3.68451e-07
ENSG00000128253.12	7.69104	1.44977	0.392969	3.68928	0.000224889	0.000643594
ENSG00000111490.11	1034.28	1.44961	0.192783	7.51942	5.50211e-14	8.49324e-13
ENSG00000182393.2	9.91304	1.44952	0.40433	3.585	0.000337082	0.000933514
ENSG00000168148.3	4.37033	1.44923	0.346947	4.17709	2.95257e-05	0.000100666
ENSG00000123219.11	620.707	1.44913	0.161605	8.96709	3.04442e-19	1.13214e-17
ENSG00000205111.7	10.7677	1.44845	0.331902	4.36408	1.27658e-05	4.66298e-05
ENSG00000104826.10	12.6861	1.44818	0.289273	5.00629	5.54882e-07	2.62596e-06
ENSG00000160401.13	212.641	1.44695	0.138587	10.4408	1.61495e-25	1.57759e-23
ENSG00000102128.7	6.22225	1.44572	0.302232	4.78347	1.72294e-06	7.44497e-06
ENSG00000170231.14	177.976	1.44531	0.369879	3.90751	9.32529e-05	0.000288213
ENSG00000124678.16	21.6048	1.44306	0.440337	3.27717	0.00104854	0.00261634
ENSG00000160224.15	20.8994	1.44285	0.382381	3.77333	0.000161085	0.000475126
ENSG00000130675.13	568.154	1.44271	0.212523	6.78847	1.13328e-11	1.18804e-10
ENSG00000121211.6	267.969	1.44191	0.179298	8.04196	8.84092e-16	1.87262e-14
ENSG00000179083.6	24.6225	1.44042	0.489562	2.94227	0.00325817	0.00728885
ENSG00000237649.6	1824.76	1.4394	0.177646	8.10263	5.37838e-16	1.17338e-14
ENSG00000166278.13	2731.96	1.43792	0.220162	6.5312	6.52459e-11	6.09759e-10
ENSG00000162814.9	92.7831	1.43742	0.232324	6.18711	6.12754e-10	4.79722e-09
ENSG00000157456.6	2172.81	1.43677	0.163834	8.76966	1.7921e-18	5.98435e-17
ENSG00000186103.3	3.02324	1.43563	0.623944	2.30089	0.0213977	0.0389599
ENSG00000196946.8	2.4091	1.43479	0.481255	2.98134	0.00286989	0.00649272
ENSG00000204644.8	80.3017	1.43451	0.525471	2.72996	0.00633424	0.0131681
ENSG00000142319.17	15.5241	1.43375	0.37398	3.83375	0.000126202	0.000380174
ENSG00000197870.11	14.8063	1.43263	0.324634	4.41307	1.01916e-05	3.80368e-05
ENSG00000104738.15	7358.55	1.43228	0.154374	9.278	1.72698e-20	7.72419e-19
ENSG00000131398.12	438.561	1.43217	0.235032	6.09352	1.10454e-09	8.28402e-09
ENSG00000170367.4	9.03031	1.43217	0.407003	3.51881	0.000433487	0.00117287
ENSG00000219438.7	436.631	1.43066	0.253942	5.63379	1.76295e-08	1.06904e-07
ENSG00000100985.7	2813.44	1.42946	0.28303	5.05055	4.4054e-07	2.12687e-06
ENSG00000254440.3	7.96558	1.42922	0.330085	4.32985	1.49213e-05	5.39358e-05
ENSG00000179750.14	587.173	1.4291	0.254122	5.6237	1.86914e-08	1.12821e-07
ENSG00000127328.20	2662.19	1.42766	0.17911	7.97084	1.57598e-15	3.24705e-14
ENSG00000126709.13	18564.6	1.42728	0.266563	5.35439	8.58467e-08	4.6525e-07
ENSG00000198554.10	951.315	1.42702	0.135649	10.5199	6.99213e-26	7.07683e-24
ENSG00000163734.4	2409.78	1.42616	0.302914	4.70814	2.49989e-06	1.04593e-05
ENSG00000106462.9	1614.96	1.42403	0.151439	9.40332	5.28664e-21	2.55673e-19
ENSG00000270379.4	15.834	1.42287	0.291758	4.87689	1.0777e-06	4.84668e-06
ENSG00000134690.9	1924.62	1.4224	0.168801	8.42649	3.56179e-17	9.42531e-16
ENSG00000004948.12	17.6666	1.4217	0.335491	4.23765	2.25871e-05	7.88299e-05
ENSG00000186818.11	1099.06	1.42056	0.23724	5.98786	2.12623e-09	1.52089e-08
ENSG00000142149.7	662.743	1.42037	0.308387	4.60583	4.1083e-06	1.64928e-05
ENSG00000185860.12	91.9627	1.41991	0.477526	2.97347	0.0029445	0.00664315
ENSG00000256966.5	6.16273	1.41847	0.295735	4.79643	1.61517e-06	7.01635e-06
ENSG00000255152.7	42.7245	1.41833	0.206772	6.8594	6.91485e-12	7.52622e-11
ENSG00000000460.15	582.45	1.41813	0.121853	11.638	2.64016e-31	6.09878e-29
ENSG00000251493.3	372.7	1.41729	0.345845	4.09804	4.16663e-05	0.000138079
ENSG00000178999.11	1346.18	1.41727	0.194238	7.29653	2.95278e-13	4.03746e-12
ENSG00000131746.11	9627.78	1.41689	0.409816	3.45739	0.000545443	0.00144805
ENSG00000110887.6	10.4205	1.41548	0.477661	2.96334	0.00304316	0.00683902
ENSG00000280684.1	1.01514	1.41516	0.520743	2.71758	0.00657615	0.0136234
ENSG00000089685.13	2163.81	1.41397	0.191684	7.37658	1.62412e-13	2.30917e-12
ENSG00000146918.18	2017.02	1.4139	0.141294	10.0068	1.42279e-23	1.02708e-21
ENSG00000123843.11	766.911	1.41231	0.327209	4.31625	1.58705e-05	5.70938e-05
ENSG00000204531.14	274.07	1.41194	0.255887	5.51781	3.43252e-08	1.98462e-07
ENSG00000196081.8	200.151	1.41176	0.215412	6.55373	5.61171e-11	5.2974e-10
ENSG00000011347.8	1678.22	1.41135	0.367068	3.84491	0.000120595	0.000364682
ENSG00000213892.9	12.1188	1.41082	0.357692	3.94424	8.00528e-05	0.000250412
ENSG00000174442.10	1593.85	1.41008	0.1159	12.1663	4.69821e-34	1.90636e-31
ENSG00000105467.7	24.1059	1.41004	0.286305	4.92494	8.43882e-07	3.86419e-06
ENSG00000073734.8	18.3707	1.40927	0.380439	3.70432	0.000211961	0.000609845
ENSG00000086548.8	40723.1	1.4083	0.385716	3.65112	0.0002611	0.000738292
ENSG00000175928.5	509.665	1.40728	0.403002	3.49199	0.000479436	0.0012862
ENSG00000205693.3	5.99907	1.40717	0.362251	3.88451	0.000102537	0.000314109
ENSG00000140527.13	41.6401	1.40519	0.265872	5.28523	1.25548e-07	6.62317e-07
ENSG00000162654.8	7264.47	1.40434	0.272177	5.15964	2.47428e-07	1.24252e-06
ENSG00000185480.10	803.358	1.40257	0.156925	8.93785	3.9683e-19	1.44559e-17
ENSG00000275591.3	11.0276	1.40196	0.319998	4.38114	1.1806e-05	4.3402e-05
ENSG00000165923.14	117.024	1.40106	0.207344	6.75719	1.40698e-11	1.45554e-10
ENSG00000256980.4	5.76262	1.39967	0.567473	2.4665	0.0136441	0.026068
ENSG00000157093.7	2.78516	1.39878	0.54617	2.56107	0.0104351	0.0205696
ENSG00000162639.14	688.539	1.39735	0.187439	7.45495	8.98996e-14	1.3302e-12
ENSG00000168418.7	5.20656	1.3962	0.488075	2.86063	0.004228	0.0091782
ENSG00000137804.11	3139.25	1.39465	0.162129	8.6021	7.82686e-18	2.34626e-16
ENSG00000176890.14	2332.57	1.39463	0.160362	8.69671	3.4163e-18	1.09249e-16
ENSG00000197272.2	12.5246	1.39444	0.293892	4.74473	2.08788e-06	8.87927e-06
ENSG00000172031.6	146.509	1.39369	0.275466	5.05937	4.20638e-07	2.03379e-06
ENSG00000189057.9	1036.67	1.39166	0.188278	7.39151	1.45174e-13	2.08369e-12
ENSG00000237353.5	3.54617	1.39097	0.484067	2.87351	0.00405943	0.00885436
ENSG00000205867.3	1.73124	1.38965	0.504301	2.7556	0.00585854	0.0122845
ENSG00000203963.10	4.52071	1.38834	0.529302	2.62297	0.0087168	0.0175669
ENSG00000155629.13	3100.12	1.38799	0.192654	7.20457	5.82288e-13	7.53674e-12
ENSG00000249428.4	5.72703	1.3877	0.360961	3.84445	0.000120823	0.00036526
ENSG00000175264.6	419.32	1.38752	0.188894	7.34546	2.05045e-13	2.87987e-12
ENSG00000120337.8	53.0111	1.38697	0.30992	4.47525	7.63237e-06	2.9156e-05
ENSG00000186638.14	723.269	1.38587	0.154652	8.96122	3.21097e-19	1.1851e-17
ENSG00000196074.11	296.372	1.38574	0.312714	4.43133	9.36548e-06	3.51945e-05
ENSG00000185087.10	34.498	1.38514	0.442931	3.12722	0.00176471	0.00418934
ENSG00000243444.6	32.4711	1.38461	0.234907	5.89427	3.76333e-09	2.5684e-08
ENSG00000171848.12	5475.8	1.38392	0.186833	7.40727	1.28928e-13	1.8738e-12
ENSG00000273154.2	30.8642	1.38388	0.187631	7.37554	1.63681e-13	2.32553e-12
ENSG00000186907.6	335.725	1.38381	0.226989	6.09639	1.0849e-09	8.1492e-09
ENSG00000145386.8	2649.45	1.38351	0.177588	7.79058	6.67006e-15	1.22399e-13
ENSG00000167968.11	40.1687	1.38332	0.216591	6.38678	1.69412e-10	1.46732e-09
ENSG00000141505.10	168.736	1.38309	0.291438	4.74575	2.07734e-06	8.84735e-06
ENSG00000163013.10	1184.53	1.38286	0.181169	7.633	2.29358e-14	3.79078e-13
ENSG00000159216.17	7576.89	1.38218	0.138328	9.99204	1.6514e-23	1.1791e-21
ENSG00000230062.5	2.01099	1.38199	0.557108	2.48065	0.0131142	0.0251462
ENSG00000185332.5	57.9928	1.38074	0.337065	4.09636	4.19705e-05	0.000138911
ENSG00000168676.9	30.2089	1.37968	0.295525	4.66857	3.03303e-06	1.24563e-05
ENSG00000128059.7	1256.34	1.37919	0.130868	10.5387	5.72621e-26	5.85594e-24
ENSG00000122778.8	1468.12	1.37891	0.192684	7.1563	8.28852e-13	1.04659e-11
ENSG00000112053.12	58.4088	1.37716	0.225245	6.11405	9.71347e-10	7.34967e-09
ENSG00000213186.6	663.43	1.37695	0.132804	10.3683	3.45466e-25	3.19963e-23
ENSG00000186051.6	4.87386	1.37692	0.34021	4.04727	5.18184e-05	0.000168425
ENSG00000186714.11	43.0906	1.37684	0.236092	5.83181	5.48309e-09	3.62127e-08
ENSG00000137474.18	925.099	1.37663	0.185131	7.43601	1.03775e-13	1.52281e-12
ENSG00000122952.15	2448.11	1.37624	0.164881	8.34686	7.0101e-17	1.75565e-15
ENSG00000149742.8	12.892	1.37546	0.440537	3.12223	0.00179485	0.00425421
ENSG00000113083.11	2524.77	1.37362	0.203628	6.74571	1.52279e-11	1.56218e-10
ENSG00000279988.1	1.24392	1.37328	0.505096	2.71885	0.006551	0.0135742
ENSG00000197355.9	1459.52	1.37301	0.17198	7.98353	1.42203e-15	2.94841e-14
ENSG00000167194.6	1.94814	1.37285	0.6225	2.20538	0.0274273	0.0485558
ENSG00000204764.11	268.273	1.37227	0.258495	5.3087	1.1041e-07	5.87507e-07
ENSG00000102265.10	34994.3	1.37223	0.186819	7.34524	2.05397e-13	2.88276e-12
ENSG00000134057.13	3069.85	1.37195	0.173719	7.89749	2.84577e-15	5.59886e-14
ENSG00000244588.4	4.70394	1.37142	0.472385	2.90319	0.0036938	0.00814186
ENSG00000128408.8	134.803	1.37098	0.263194	5.209	1.89861e-07	9.73856e-07
ENSG00000175485.2	2.03017	1.37082	0.462489	2.96402	0.00303653	0.00682724
ENSG00000120889.11	4502.43	1.3705	0.134801	10.1668	2.78897e-24	2.26287e-22
ENSG00000273604.1	702.447	1.36977	0.235683	5.81194	6.17517e-09	4.04165e-08
ENSG00000159784.16	281.208	1.3697	0.344981	3.97037	7.17618e-05	0.000226848
ENSG00000012048.18	1748.38	1.36926	0.138693	9.87256	5.47486e-23	3.55957e-21
ENSG00000116035.2	38.9612	1.36834	0.338662	4.04042	5.33546e-05	0.00017296
ENSG00000125885.12	1862.3	1.36828	0.137194	9.97339	1.99315e-23	1.39272e-21
ENSG00000279524.1	2.5563	1.3679	0.415661	3.2909	0.000998663	0.00250176
ENSG00000156787.15	728.276	1.36768	0.120732	11.3282	9.51427e-30	1.79403e-27
ENSG00000170122.5	33.2169	1.36671	0.262661	5.20333	1.95749e-07	9.9962e-07
ENSG00000011201.9	717.909	1.36649	0.233668	5.84798	4.97578e-09	3.32311e-08
ENSG00000175097.6	2.22535	1.36624	0.555196	2.46082	0.0138619	0.0264481
ENSG00000244411.3	3.55462	1.36624	0.381727	3.5791	0.000344779	0.000952814
ENSG00000178445.8	385.426	1.36465	0.411894	3.3131	0.000922687	0.00232806
ENSG00000142182.7	3.56184	1.3646	0.596515	2.28762	0.0221595	0.0401823
ENSG00000179698.12	114.374	1.36359	0.253045	5.38873	7.09583e-08	3.88638e-07
ENSG00000182481.7	7901.16	1.3632	0.139884	9.74521	1.93381e-22	1.15062e-20
ENSG00000125319.13	438.101	1.36295	0.154199	8.83889	9.66738e-19	3.34778e-17
ENSG00000178172.5	2.38897	1.36233	0.536022	2.54157	0.0110357	0.0216146
ENSG00000215262.6	6.97457	1.36076	0.582756	2.33505	0.0195409	0.0359391
ENSG00000155011.7	225.074	1.35896	0.290465	4.67856	2.88892e-06	1.19093e-05
ENSG00000276085.1	172.613	1.35854	0.293676	4.62599	3.7281e-06	1.50993e-05
ENSG00000140105.16	20611.9	1.35808	0.24568	5.52784	3.24197e-08	1.88025e-07
ENSG00000186367.6	2.53722	1.35806	0.573453	2.36822	0.0178741	0.0331875
ENSG00000109674.3	217.735	1.35732	0.185007	7.33658	2.19122e-13	3.0688e-12
ENSG00000146263.10	1149.88	1.3563	0.125664	10.7931	3.71085e-27	4.44284e-25
ENSG00000152253.7	567.229	1.35596	0.168877	8.02924	9.80815e-16	2.0657e-14
ENSG00000144214.8	52.0702	1.35545	0.221917	6.10791	1.00942e-09	7.61721e-09
ENSG00000277957.1	12.2155	1.35442	0.274409	4.93576	7.98373e-07	3.66263e-06
ENSG00000138092.9	948.975	1.35366	0.11929	11.3477	7.61662e-30	1.45196e-27
ENSG00000183773.14	123.607	1.35269	0.251276	5.38326	7.3149e-08	4.0019e-07
ENSG00000221944.4	299.265	1.3524	0.151765	8.91113	5.05141e-19	1.79682e-17
ENSG00000221852.4	2.097	1.35138	0.569971	2.37096	0.0177419	0.0329733
ENSG00000165120.3	2.48203	1.35112	0.595697	2.26813	0.0233214	0.0420531
ENSG00000011332.18	78.4412	1.35054	0.218202	6.18942	6.03863e-10	4.73138e-09
ENSG00000206013.2	8.18903	1.34862	0.437788	3.08054	0.00206628	0.00483224
ENSG00000274267.1	20.9691	1.34846	0.300718	4.48413	7.32103e-06	2.80923e-05
ENSG00000184984.9	24.4132	1.34832	0.289755	4.6533	3.26668e-06	1.33433e-05
ENSG00000124469.9	18.991	1.34773	0.318333	4.2337	2.29875e-05	8.00993e-05
ENSG00000149651.3	2.08661	1.34773	0.567215	2.37604	0.0174996	0.0325969
ENSG00000182308.6	23.9369	1.34768	0.237274	5.67982	1.34835e-08	8.35957e-08
ENSG00000121716.17	445.264	1.34302	0.194155	6.91727	4.60426e-12	5.18673e-11
ENSG00000104941.6	8.25749	1.34212	0.450236	2.98092	0.00287386	0.00650019
ENSG00000281593.1	4.26276	1.34191	0.331936	4.04267	5.28457e-05	0.000171367
ENSG00000111799.19	18020.7	1.34159	0.227901	5.88672	3.93925e-09	2.6773e-08
ENSG00000186086.15	5.73217	1.34064	0.5925	2.26268	0.0236552	0.0425924
ENSG00000254656.1	19.0441	1.33997	0.517554	2.58904	0.0096245	0.0191596
ENSG00000278463.1	3.87648	1.33893	0.359769	3.72163	0.000197942	0.000573498
ENSG00000187533.12	6.40011	1.33872	0.533241	2.51054	0.0120546	0.0233424
ENSG00000281676.1	1.6369	1.33763	0.454849	2.94083	0.00327337	0.00731785
ENSG00000114270.14	2845.66	1.33514	0.298145	4.47816	7.52908e-06	2.87782e-05
ENSG00000173678.13	8.62372	1.33498	0.344129	3.87932	0.000104751	0.000320221
ENSG00000138074.13	3518.86	1.33468	0.149495	8.92794	4.34004e-19	1.56648e-17
ENSG00000007171.15	2020.45	1.3346	0.44102	3.02618	0.00247667	0.00569166
ENSG00000070882.11	3639.38	1.3338	0.133179	10.0151	1.30794e-23	9.51166e-22
ENSG00000121446.16	8.68232	1.33243	0.485673	2.74347	0.00607944	0.0126949
ENSG00000138182.13	2085.15	1.33173	0.131994	10.0893	6.15868e-24	4.66894e-22
ENSG00000280308.1	1.62631	1.32943	0.409395	3.24731	0.00116502	0.00287327
ENSG00000104951.14	704.293	1.32916	0.235495	5.64412	1.66027e-08	1.01087e-07
ENSG00000197408.7	1101.23	1.32711	0.441656	3.00485	0.00265712	0.00604969
ENSG00000204688.8	2.68454	1.32635	0.604939	2.19253	0.0283411	0.0499262
ENSG00000174938.13	6298.27	1.32635	0.219349	6.04672	1.4782e-09	1.08341e-08
ENSG00000204516.8	686.177	1.32538	0.19997	6.6279	3.40499e-11	3.31139e-10
ENSG00000230873.7	9.32286	1.32499	0.44551	2.97409	0.00293855	0.006632
ENSG00000177614.8	291.75	1.32472	0.277259	4.77791	1.7713e-06	7.63476e-06
ENSG00000117600.11	320.445	1.32417	0.256348	5.16552	2.3977e-07	1.20777e-06
ENSG00000049249.7	322.06	1.32391	0.222896	5.93958	2.85756e-09	1.99816e-08
ENSG00000106397.10	8969.71	1.32346	0.152728	8.66545	4.49718e-18	1.40385e-16
ENSG00000117399.12	3367.25	1.32236	0.194579	6.796	1.07567e-11	1.13067e-10
ENSG00000267881.1	21.1804	1.32213	0.477043	2.7715	0.00557981	0.0117629
ENSG00000145113.20	6897.91	1.32121	0.421384	3.13542	0.00171611	0.00408484
ENSG00000125618.15	704.208	1.31986	0.221432	5.96059	2.51335e-09	1.7758e-08
ENSG00000281126.1	4.50504	1.31892	0.307056	4.29536	1.74407e-05	6.21278e-05
ENSG00000173193.12	8628.18	1.31885	0.137215	9.61152	7.1485e-22	3.93167e-20
ENSG00000110484.6	5.17521	1.31824	0.595376	2.21413	0.0268199	0.0476785
ENSG00000205143.2	9.30131	1.31775	0.318671	4.13513	3.54751e-05	0.00011911
ENSG00000144381.15	22104.7	1.31762	0.133617	9.86115	6.13443e-23	3.96216e-21
ENSG00000176029.12	12.6532	1.31752	0.298387	4.41547	1.00791e-05	3.76384e-05
ENSG00000151812.13	7.7281	1.31751	0.344585	3.82348	0.000131581	0.000394681
ENSG00000149257.12	12905.1	1.31746	0.13591	9.69362	3.20937e-22	1.86991e-20
ENSG00000179111.7	12.4	1.31722	0.422374	3.11861	0.00181708	0.00430327
ENSG00000113140.9	55981.1	1.31607	0.188163	6.9943	2.66584e-12	3.09726e-11
ENSG00000139734.16	962.132	1.31498	0.16872	7.79387	6.49852e-15	1.19586e-13
ENSG00000165905.15	2035.36	1.3146	0.298053	4.41062	1.03076e-05	3.84113e-05
ENSG00000136110.11	11.3335	1.31405	0.454408	2.89177	0.00383073	0.00840126
ENSG00000269891.2	2.31484	1.31314	0.569576	2.30547	0.0211402	0.0385447
ENSG00000132000.10	470.024	1.31305	0.231958	5.66074	1.50725e-08	9.25997e-08
ENSG00000112242.13	1508.9	1.31286	0.108443	12.1065	9.76201e-34	3.48504e-31
ENSG00000270299.1	3.27828	1.31133	0.347363	3.77509	0.000159952	0.000472067
ENSG00000100526.18	985.221	1.31079	0.181073	7.23901	4.5197e-13	5.99219e-12
ENSG00000158286.11	999.37	1.31056	0.174636	7.50453	6.16501e-14	9.44965e-13
ENSG00000166589.11	266.089	1.30658	0.472496	2.76526	0.00568771	0.0119595
ENSG00000130477.13	248.457	1.30621	0.323452	4.03834	5.38307e-05	0.000174244
ENSG00000164556.7	3.93833	1.30615	0.408149	3.20018	0.0013734	0.00333705
ENSG00000203668.1	1391.66	1.30552	0.161871	8.06519	7.31249e-16	1.56117e-14
ENSG00000171320.13	1010.56	1.30486	0.188278	6.9305	4.19341e-12	4.74842e-11
ENSG00000151651.14	2282.57	1.30458	0.216793	6.01763	1.7699e-09	1.28236e-08
ENSG00000182676.4	8.37681	1.30419	0.299912	4.34859	1.37019e-05	4.984e-05
ENSG00000182472.7	405.09	1.30419	0.261367	4.98987	6.04202e-07	2.8368e-06
ENSG00000196793.12	421.663	1.3039	0.160378	8.13017	4.28699e-16	9.44725e-15
ENSG00000151962.6	6.47077	1.3019	0.523604	2.48643	0.0129033	0.0247822
ENSG00000124731.11	286.25	1.30134	0.289204	4.49973	6.8039e-06	2.62723e-05
ENSG00000144837.7	499.528	1.30043	0.255046	5.09879	3.41831e-07	1.67629e-06
ENSG00000205899.3	1.36606	1.30019	0.561046	2.31744	0.0204795	0.0374514
ENSG00000103569.8	427.54	1.29949	0.309943	4.19269	2.75663e-05	9.47592e-05
ENSG00000135077.7	798.539	1.29875	0.195534	6.64207	3.093e-11	3.03201e-10
ENSG00000173093.11	4.80468	1.29867	0.54027	2.40374	0.0162284	0.0304953
ENSG00000158815.9	12.465	1.29649	0.322192	4.02396	5.72282e-05	0.000184058
ENSG00000203985.9	57.0092	1.29399	0.408428	3.16822	0.00153378	0.00368523
ENSG00000242866.8	21.7782	1.29373	0.327336	3.95228	7.74086e-05	0.000243031
ENSG00000170909.12	293	1.29315	0.206942	6.24886	4.1347e-10	3.33408e-09
ENSG00000166363.5	2.0431	1.29212	0.536704	2.4075	0.0160622	0.0302002
ENSG00000102001.11	69.6327	1.28889	0.242879	5.30673	1.11608e-07	5.93236e-07
ENSG00000163467.10	50.8724	1.28876	0.181333	7.10715	1.18464e-12	1.45742e-11
ENSG00000163914.4	2.14847	1.28831	0.540534	2.3834	0.0171536	0.0320527
ENSG00000198759.10	298.123	1.28798	0.266075	4.84065	1.29417e-06	5.72194e-06
ENSG00000213973.7	17.7569	1.28769	0.369736	3.48273	0.000496335	0.00132809
ENSG00000102837.6	116109	1.28689	0.521562	2.46738	0.0136108	0.0260222
ENSG00000185304.13	46.3826	1.2864	0.275413	4.67081	3.00019e-06	1.23317e-05
ENSG00000047634.13	1731.09	1.28605	0.180348	7.1309	9.97177e-13	1.24236e-11
ENSG00000172139.13	42.6528	1.28505	0.240192	5.35009	8.79118e-08	4.75916e-07
ENSG00000189167.10	3.05867	1.28449	0.443508	2.89621	0.00377703	0.00830295
ENSG00000188124.2	2.85574	1.28435	0.476997	2.69258	0.00709012	0.0145683
ENSG00000174562.12	22.7983	1.28409	0.499605	2.57022	0.0101634	0.0201127
ENSG00000166508.16	8471.9	1.28388	0.161315	7.95883	1.73668e-15	3.54836e-14
ENSG00000196739.13	3135.28	1.28236	0.204415	6.27331	3.53454e-10	2.89169e-09
ENSG00000123975.4	3024	1.2822	0.182285	7.03405	2.00626e-12	2.38456e-11
ENSG00000184659.5	3.5684	1.28182	0.431729	2.96904	0.0029873	0.00673197
ENSG00000171631.13	540.67	1.2811	0.202854	6.31537	2.69511e-10	2.25377e-09
ENSG00000180340.6	648.627	1.28013	0.219301	5.83732	5.30473e-09	3.52601e-08
ENSG00000115415.17	21615.1	1.28008	0.162339	7.88525	3.13902e-15	6.0964e-14
ENSG00000013573.15	1877.48	1.27904	0.148707	8.60105	7.89932e-18	2.36438e-16
ENSG00000133454.14	120.469	1.27839	0.447246	2.85836	0.0042583	0.00923377
ENSG00000139354.9	900.5	1.27699	0.16492	7.74311	9.70123e-15	1.72072e-13
ENSG00000137558.6	685.813	1.27643	0.361248	3.5334	0.000410258	0.00111432
ENSG00000267908.1	6.84271	1.27615	0.303938	4.19873	2.68412e-05	9.25421e-05
ENSG00000273514.1	0.988607	1.27595	0.461378	2.76551	0.0056833	0.0119528
ENSG00000255307.1	2.12142	1.27369	0.549409	2.3183	0.0204333	0.0373738
ENSG00000163083.5	890.844	1.2732	0.304217	4.18518	2.84946e-05	9.76255e-05
ENSG00000179097.5	11.6859	1.27291	0.268835	4.73492	2.19137e-06	9.29118e-06
ENSG00000130635.14	23634.6	1.27271	0.215215	5.91367	3.34575e-09	2.31072e-08
ENSG00000162723.8	25.3279	1.27235	0.333836	3.8113	0.00013824	0.000412889
ENSG00000100479.11	504.646	1.27095	0.139783	9.09234	9.69332e-20	3.90017e-18
ENSG00000104848.1	10.5773	1.2709	0.329682	3.85492	0.000115767	0.000351449
ENSG00000100156.9	74.6202	1.27079	0.217997	5.82941	5.56242e-09	3.66503e-08
ENSG00000205057.4	6.00218	1.27076	0.489517	2.59594	0.00943331	0.0188235
ENSG00000186136.1	3.04666	1.27064	0.444012	2.86172	0.0042135	0.0091538
ENSG00000183742.11	4991.8	1.26936	0.217225	5.84356	5.10974e-09	3.40794e-08
ENSG00000130826.14	4907.72	1.26849	0.117097	10.8328	2.40696e-27	2.91732e-25
ENSG00000173852.12	3374.29	1.26824	0.134075	9.45916	3.1043e-21	1.53922e-19
ENSG00000186150.4	3.66573	1.26766	0.398715	3.17937	0.00147595	0.00356127
ENSG00000058804.11	3503.24	1.26759	0.123981	10.224	1.54821e-24	1.30468e-22
ENSG00000196503.2	95.1961	1.26635	0.262372	4.82655	1.38917e-06	6.09117e-06
ENSG00000204965.7	24.8932	1.2654	0.398615	3.17449	0.00150101	0.00361579
ENSG00000173809.14	38.3787	1.26381	0.372076	3.39664	0.000682195	0.00177041
ENSG00000104312.7	1879.45	1.26353	0.125099	10.1002	5.51251e-24	4.22805e-22
ENSG00000242950.5	31.7442	1.26341	0.263653	4.79196	1.65162e-06	7.15727e-06
ENSG00000230657.5	2.57216	1.26249	0.449129	2.81097	0.00493917	0.0105471
ENSG00000158714.9	1098.78	1.26247	0.223465	5.64952	1.60895e-08	9.82329e-08
ENSG00000258839.2	207.849	1.26229	0.165433	7.63021	2.34363e-14	3.87025e-13
ENSG00000262180.1	36.2941	1.26089	0.189252	6.66249	2.69219e-11	2.66303e-10
ENSG00000113368.10	3788.6	1.26051	0.165559	7.61367	2.66418e-14	4.33398e-13
ENSG00000185313.6	4.84124	1.25906	0.569873	2.20937	0.027149	0.0481676
ENSG00000106128.17	16.1516	1.25824	0.388593	3.23794	0.00120395	0.00296012
ENSG00000276903.1	12.2482	1.25794	0.335029	3.75473	0.000173529	0.000507332
ENSG00000160336.13	1287.65	1.25695	0.143065	8.78585	1.55185e-18	5.22651e-17
ENSG00000137561.4	98.3268	1.25569	0.399169	3.14575	0.00165661	0.00395471
ENSG00000149609.5	37.0173	1.25526	0.184538	6.80217	1.03055e-11	1.08731e-10
ENSG00000101188.4	256.701	1.25519	0.396114	3.16877	0.00153088	0.00367871
ENSG00000139714.11	123.119	1.25491	0.296011	4.2394	2.2412e-05	7.82606e-05
ENSG00000164082.13	53.7389	1.25296	0.200844	6.23847	4.41859e-10	3.54553e-09
ENSG00000235162.7	5986.63	1.25263	0.210857	5.94069	2.83824e-09	1.98606e-08
ENSG00000198108.3	214.746	1.25215	0.175077	7.15199	8.55263e-13	1.0751e-11
ENSG00000196876.12	331.666	1.25006	0.265755	4.70379	2.55379e-06	1.06643e-05
ENSG00000164934.12	3183.23	1.25003	0.134863	9.26889	1.88088e-20	8.35543e-19
ENSG00000104147.7	295.318	1.24957	0.166177	7.51953	5.49737e-14	8.49259e-13
ENSG00000105011.7	1975.71	1.24874	0.173798	7.18504	6.71864e-13	8.62789e-12
ENSG00000093134.12	112.661	1.2487	0.383367	3.25719	0.00112523	0.00278611
ENSG00000187033.8	4.4004	1.2486	0.519627	2.40288	0.0162667	0.0305614
ENSG00000204613.9	157.298	1.2484	0.246452	5.06547	4.07392e-07	1.97305e-06
ENSG00000188501.10	24.1164	1.24782	0.214002	5.8309	5.51304e-09	3.63782e-08
ENSG00000234602.6	115.564	1.24747	0.257275	4.8488	1.24213e-06	5.51794e-06
ENSG00000204616.9	3960.32	1.24732	0.2872	4.34303	1.40533e-05	5.10279e-05
ENSG00000140451.11	423.101	1.24678	0.153374	8.12899	4.32896e-16	9.52906e-15
ENSG00000179051.12	11371.6	1.24633	0.111154	11.2126	3.53665e-29	6.08454e-27
ENSG00000204960.6	2.03433	1.2459	0.489483	2.54535	0.0109169	0.0214119
ENSG00000080839.10	1333.38	1.24488	0.125474	9.92137	3.36115e-23	2.25243e-21
ENSG00000105610.4	8.52504	1.24434	0.325656	3.82103	0.000132895	0.000398379
ENSG00000136122.14	598.967	1.24432	0.150426	8.27201	1.3172e-16	3.15404e-15
ENSG00000175189.3	9.40516	1.24421	0.355632	3.49858	0.000467747	0.00125742
ENSG00000120694.18	10088.3	1.24412	0.162512	7.65553	1.9252e-14	3.22261e-13
ENSG00000128641.16	4862.76	1.2439	0.141195	8.80976	1.25409e-18	4.26759e-17
ENSG00000261236.4	4744.47	1.24288	0.139348	8.91921	4.69621e-19	1.67655e-17
ENSG00000112559.12	1599.81	1.24232	0.212036	5.859	4.6566e-09	3.11843e-08
ENSG00000120526.9	1541.58	1.24206	0.123765	10.0356	1.06276e-23	7.81543e-22
ENSG00000105717.12	205.186	1.24173	0.177293	7.00381	2.49098e-12	2.91654e-11
ENSG00000181634.7	1416.37	1.24133	0.201217	6.16912	6.86722e-10	5.31067e-09
ENSG00000128567.15	6827.65	1.23815	0.14609	8.4753	2.34466e-17	6.38522e-16
ENSG00000169330.7	166.23	1.23795	0.180941	6.8417	7.82586e-12	8.42901e-11
ENSG00000259305.4	44.4586	1.23712	0.162754	7.60113	2.93549e-14	4.74011e-13
ENSG00000272514.4	5.83415	1.23684	0.398986	3.09995	0.00193556	0.00455309
ENSG00000182853.10	195.015	1.23648	0.25451	4.85827	1.18419e-06	5.27844e-06
ENSG00000010932.14	204.601	1.23623	0.25878	4.77712	1.77824e-06	7.66199e-06
ENSG00000138658.14	424.665	1.23566	0.138805	8.90213	5.47844e-19	1.94168e-17
ENSG00000102452.14	140.687	1.23515	0.313829	3.93573	8.29438e-05	0.000258837
ENSG00000120334.14	644.79	1.23495	0.112402	10.9869	4.41675e-28	6.40811e-26
ENSG00000016391.9	2755.41	1.23465	0.181017	6.82067	9.06158e-12	9.64359e-11
ENSG00000182324.6	164.446	1.23456	0.178494	6.91654	4.62792e-12	5.20443e-11
ENSG00000130598.14	90.1845	1.23425	0.312482	3.94982	7.82089e-05	0.000245152
ENSG00000175544.12	111.66	1.2334	0.292453	4.21745	2.47081e-05	8.56843e-05
ENSG00000144644.13	10.425	1.23296	0.429384	2.87147	0.00408567	0.00890664
ENSG00000117115.11	1429.11	1.23274	0.299221	4.11984	3.79132e-05	0.000126646
ENSG00000272442.2	13.9551	1.23197	0.264284	4.66154	3.13849e-06	1.28598e-05
ENSG00000254553.1	2.17097	1.23165	0.499251	2.46699	0.0136254	0.026037
ENSG00000090534.16	42.1427	1.22987	0.37092	3.31574	0.000914009	0.00230765
ENSG00000107831.11	8.49098	1.22983	0.341816	3.59795	0.000320737	0.00089177
ENSG00000100079.6	1397.03	1.2294	0.345753	3.5557	0.000376972	0.00103205
ENSG00000213889.9	312.821	1.22815	0.228156	5.38297	7.32683e-08	4.00731e-07
ENSG00000189366.8	103.948	1.22796	0.280766	4.3736	1.22214e-05	4.48369e-05
ENSG00000131914.9	8.67418	1.2277	0.376407	3.26162	0.00110778	0.00274845
ENSG00000106077.17	3348.72	1.22762	0.16746	7.33079	2.28799e-13	3.19749e-12
ENSG00000013810.17	3741.42	1.22695	0.153434	7.99662	1.27879e-15	2.66833e-14
ENSG00000121570.11	17.8947	1.22673	0.357804	3.42849	0.000606945	0.00159515
ENSG00000139146.12	4659.99	1.22617	0.151224	8.10831	5.13294e-16	1.12233e-14
ENSG00000203814.6	140.098	1.2257	0.214285	5.71996	1.06549e-08	6.72263e-08
ENSG00000174669.10	2162.66	1.22567	0.158611	7.72753	1.0965e-14	1.91546e-13
ENSG00000117877.9	387.334	1.22517	0.148178	8.26819	1.36012e-16	3.24495e-15
ENSG00000151725.10	1058.42	1.22208	0.174361	7.00893	2.40151e-12	2.81683e-11
ENSG00000279928.1	3.73271	1.22203	0.522739	2.33775	0.0194002	0.035707
ENSG00000124635.8	204.767	1.21976	0.262643	4.64416	3.41455e-06	1.39155e-05
ENSG00000165076.12	4.66817	1.21966	0.389389	3.13225	0.00173471	0.00412562
ENSG00000165215.6	9709.81	1.21847	0.361145	3.37391	0.00074109	0.00190862
ENSG00000163794.6	44.8612	1.21753	0.206033	5.90937	3.43409e-09	2.36757e-08
ENSG00000174473.14	55.9082	1.21669	0.403036	3.01881	0.00253773	0.00581629
ENSG00000104356.9	656.599	1.21603	0.131226	9.26671	1.9198e-20	8.50911e-19
ENSG00000131015.4	208.678	1.21509	0.335507	3.62164	0.000292739	0.000819729
ENSG00000170748.6	1.85523	1.21502	0.497762	2.44096	0.0146481	0.0277916
ENSG00000008735.13	834.226	1.2146	0.325418	3.73244	0.000189634	0.000550565
ENSG00000136883.11	1327.83	1.2136	0.260646	4.65612	3.22221e-06	1.31753e-05
ENSG00000145604.14	2231.33	1.21308	0.161172	7.52666	5.20565e-14	8.08647e-13
ENSG00000064763.9	1614.16	1.2126	0.199999	6.06304	1.33573e-09	9.88578e-09
ENSG00000128313.2	3.34874	1.21254	0.473319	2.56178	0.0104136	0.0205375
ENSG00000261456.4	7.95587	1.21215	0.336204	3.60539	0.00031169	0.000868706
ENSG00000160883.9	224.776	1.2116	0.224085	5.4069	6.41246e-08	3.54872e-07
ENSG00000148200.15	446.325	1.21012	0.195364	6.19416	5.85967e-10	4.60034e-09
ENSG00000273045.4	213.701	1.20804	0.156128	7.73749	1.01396e-14	1.78878e-13
ENSG00000136535.13	8.77136	1.20792	0.427993	2.82228	0.00476833	0.0102279
ENSG00000107815.6	991.457	1.2073	0.124925	9.66422	4.27851e-22	2.43904e-20
ENSG00000268173.1	3.45849	1.20721	0.383261	3.14983	0.00163364	0.00390462
ENSG00000105963.12	2811.23	1.20689	0.175379	6.88157	5.91973e-12	6.53367e-11
ENSG00000105327.14	1160.18	1.20686	0.169429	7.1231	1.05525e-12	1.31222e-11
ENSG00000157423.16	45.9669	1.20644	0.369294	3.26687	0.00108742	0.00270272
ENSG00000164304.14	8.24912	1.20633	0.372398	3.23937	0.00119795	0.00294649
ENSG00000134013.14	4316.87	1.20561	0.173907	6.93248	4.13526e-12	4.69068e-11
ENSG00000125551.17	3.24432	1.20537	0.355878	3.38702	0.00070655	0.00182757
ENSG00000183763.7	346.6	1.20471	0.148123	8.13314	4.18307e-16	9.24939e-15
ENSG00000065911.10	4328.57	1.20344	0.131245	9.16937	4.75806e-20	2.00052e-18
ENSG00000205089.6	496.272	1.20222	0.223798	5.37189	7.79177e-08	4.24504e-07
ENSG00000146700.8	82.3073	1.20211	0.2101	5.72162	1.05511e-08	6.66575e-08
ENSG00000257127.5	9.25339	1.20061	0.397925	3.01718	0.00255142	0.00584156
ENSG00000134627.10	655.663	1.20056	0.191211	6.2787	3.41408e-10	2.80248e-09
ENSG00000139269.2	29.3879	1.1997	0.244345	4.90987	9.11366e-07	4.14324e-06
ENSG00000137959.14	2690.09	1.19924	0.280615	4.27361	1.92331e-05	6.79825e-05
ENSG00000159259.7	844.592	1.19912	0.145523	8.24009	1.7208e-16	4.06106e-15
ENSG00000100167.18	314.551	1.19862	0.302052	3.96827	7.23959e-05	0.000228646
ENSG00000174498.12	37.8284	1.19798	0.418817	2.8604	0.00423112	0.00918294
ENSG00000225556.1	202.381	1.1973	0.198308	6.03756	1.5646e-09	1.14374e-08
ENSG00000204335.3	763.829	1.19676	0.362481	3.30159	0.000961389	0.0024167
ENSG00000084110.9	90.271	1.19606	0.300334	3.98243	6.82153e-05	0.000216382
ENSG00000135069.12	2702.17	1.19561	0.229331	5.21348	1.85327e-07	9.5259e-07
ENSG00000277161.1	624.036	1.19545	0.116507	10.2608	1.05836e-24	9.1144e-23
ENSG00000125462.15	59.1049	1.1946	0.375961	3.17745	0.00148575	0.00358212
ENSG00000132646.9	8892.49	1.19309	0.149597	7.97534	1.5196e-15	3.14078e-14
ENSG00000135763.8	1351.11	1.19284	0.11547	10.3303	5.13945e-25	4.5662e-23
ENSG00000198720.11	944.302	1.19239	0.177896	6.70274	2.04551e-11	2.06073e-10
ENSG00000107165.11	252.326	1.1922	0.350854	3.39799	0.000678826	0.00176306
ENSG00000136943.9	963.224	1.19142	0.279705	4.25956	2.04828e-05	7.2114e-05
ENSG00000270757.1	2.70735	1.19119	0.349552	3.40776	0.000654988	0.00170793
ENSG00000116017.9	2309.72	1.19047	0.256886	4.63421	3.58299e-06	1.45385e-05
ENSG00000107249.20	1213.5	1.19024	0.235676	5.05032	4.41079e-07	2.12896e-06
ENSG00000165661.14	1833.83	1.19008	0.125288	9.49877	2.12386e-21	1.06928e-19
ENSG00000187726.7	16.3491	1.1887	0.325152	3.65582	0.000256361	0.000726042
ENSG00000137674.3	8.32267	1.18831	0.472169	2.5167	0.011846	0.0229974
ENSG00000180071.17	170.04	1.18805	0.306002	3.88248	0.000103396	0.000316522
ENSG00000113721.12	11281	1.1873	0.185312	6.40701	1.48402e-10	1.29968e-09
ENSG00000185090.13	1226.61	1.18657	0.221881	5.34775	8.90529e-08	4.8143e-07
ENSG00000114631.10	2929.79	1.18634	0.26036	4.55654	5.20032e-06	2.04872e-05
ENSG00000176853.14	5882.07	1.18536	0.114443	10.3576	3.86371e-25	3.54505e-23
ENSG00000249961.8	10.8018	1.18533	0.364588	3.25115	0.00114937	0.00284052
ENSG00000169900.6	6.77952	1.18532	0.480439	2.46716	0.0136189	0.0260351
ENSG00000274997.1	9.76686	1.18531	0.277984	4.26396	2.00834e-05	7.08475e-05
ENSG00000167210.15	28.4595	1.18461	0.284169	4.16868	3.06368e-05	0.000104075
ENSG00000171365.14	1548.77	1.18414	0.156716	7.556	4.1566e-14	6.58715e-13
ENSG00000187144.10	18.5129	1.18395	0.353647	3.34782	0.00081451	0.00207781
ENSG00000178295.13	1309.27	1.18391	0.135392	8.74433	2.24349e-18	7.39109e-17
ENSG00000158427.13	27.3528	1.18336	0.263883	4.4844	7.31192e-06	2.80629e-05
ENSG00000164647.7	1528.56	1.18328	0.208809	5.66678	1.45503e-08	8.97567e-08
ENSG00000133665.11	17.5517	1.18258	0.453377	2.60839	0.00909693	0.0182319
ENSG00000179058.6	25.9419	1.18225	0.263757	4.48235	7.38256e-06	2.82842e-05
ENSG00000131969.13	54.9489	1.18132	0.385643	3.06324	0.00218952	0.00508172
ENSG00000117586.9	277.225	1.1813	0.21268	5.55434	2.7867e-08	1.63676e-07
ENSG00000171121.15	116.758	1.18106	0.223711	5.27939	1.29614e-07	6.83031e-07
ENSG00000122735.14	11.4072	1.18097	0.384116	3.07451	0.00210852	0.00491695
ENSG00000105281.11	9509.98	1.18087	0.183966	6.41895	1.3722e-10	1.20713e-09
ENSG00000109881.15	1357.91	1.18029	0.165516	7.13097	9.96675e-13	1.24236e-11
ENSG00000135362.12	796.02	1.18008	0.196053	6.01919	1.75289e-09	1.27097e-08
ENSG00000111331.11	11104.1	1.17946	0.174681	6.75208	1.45745e-11	1.5022e-10
ENSG00000124571.16	4815.44	1.17931	0.137407	8.58258	9.27664e-18	2.72267e-16
ENSG00000167524.13	242.095	1.17838	0.151583	7.7738	7.61655e-15	1.37835e-13
ENSG00000281192.1	2.10069	1.17827	0.413974	2.84624	0.0044239	0.00956222
ENSG00000186074.17	227.976	1.17793	0.223624	5.26746	1.38323e-07	7.25226e-07
ENSG00000143226.12	2770.22	1.17747	0.191819	6.13848	8.33165e-10	6.35062e-09
ENSG00000141371.11	5.63389	1.17728	0.382324	3.07927	0.0020751	0.00484996
ENSG00000215788.8	808.428	1.17696	0.195929	6.0071	1.88875e-09	1.36444e-08
ENSG00000105982.15	218.673	1.17641	0.183191	6.42176	1.34708e-10	1.18663e-09
ENSG00000141497.12	438.807	1.17577	0.180625	6.50946	7.54203e-11	6.99848e-10
ENSG00000266265.2	12.4797	1.17373	0.468749	2.50396	0.0122814	0.0237253
ENSG00000140937.12	5045.18	1.17307	0.208316	5.63119	1.78973e-08	1.08361e-07
ENSG00000124568.9	6.57506	1.17296	0.52816	2.22085	0.026361	0.0469477
ENSG00000180198.14	3165.87	1.17279	0.148642	7.89003	3.02117e-15	5.88498e-14
ENSG00000122180.4	3.38018	1.17274	0.533158	2.19961	0.0278346	0.0491442
ENSG00000115423.17	191.365	1.17101	0.244879	4.78199	1.7357e-06	7.49517e-06
ENSG00000055957.9	16.904	1.17001	0.384913	3.03968	0.00236826	0.00546105
ENSG00000175514.2	3.59283	1.16958	0.41188	2.83961	0.00451691	0.00973433
ENSG00000187498.13	35795.8	1.16869	0.174655	6.69144	2.20986e-11	2.2138e-10
ENSG00000112706.10	32.1738	1.16824	0.210057	5.56151	2.67458e-08	1.57515e-07
ENSG00000146674.13	13973.2	1.16797	0.20117	5.80589	6.40267e-09	4.17524e-08
ENSG00000280230.1	1.35635	1.16729	0.427099	2.73306	0.00627492	0.0130628
ENSG00000157335.18	3.7161	1.16678	0.42545	2.74245	0.00609823	0.0127273
ENSG00000205846.3	11.5724	1.16578	0.387067	3.01184	0.00259673	0.00593274
ENSG00000121743.3	121.765	1.16501	0.394011	2.95679	0.0031086	0.00697649
ENSG00000095110.6	26.7639	1.16386	0.511705	2.27448	0.022937	0.0414437
ENSG00000171595.12	10.2344	1.16257	0.367507	3.1634	0.00155938	0.0037408
ENSG00000174788.8	22.5321	1.16181	0.262358	4.42835	9.4958e-06	3.56433e-05
ENSG00000161849.3	1.71692	1.16015	0.483718	2.3984	0.016467	0.0308963
ENSG00000213588.5	6.60802	1.15963	0.256557	4.51995	6.18536e-06	2.40256e-05
ENSG00000168263.8	9.0635	1.15927	0.287044	4.03863	5.37646e-05	0.000174117
ENSG00000140853.14	4930	1.1587	0.168948	6.85833	6.96679e-12	7.57856e-11
ENSG00000160282.12	47.8563	1.15715	0.448617	2.57938	0.00989792	0.0196388
ENSG00000149488.12	26.4397	1.15705	0.36733	3.14988	0.00163336	0.00390444
ENSG00000122966.12	2093.14	1.15701	0.138222	8.37072	5.72688e-17	1.45846e-15
ENSG00000141744.3	51.0601	1.15656	0.412048	2.80687	0.00500257	0.010672
ENSG00000168487.16	3108.49	1.15587	0.133793	8.63922	5.66003e-18	1.7392e-16
ENSG00000175643.8	1014.98	1.15572	0.162535	7.1106	1.15537e-12	1.42497e-11
ENSG00000205784.2	49.1012	1.15491	0.276288	4.18009	2.91396e-05	9.94919e-05
ENSG00000152822.12	10.9218	1.15428	0.318728	3.62153	0.000292869	0.000819975
ENSG00000101306.9	19.4865	1.15319	0.226038	5.10174	3.36549e-07	1.65162e-06
ENSG00000111581.8	2526.58	1.15314	0.131681	8.75706	2.00412e-18	6.64712e-17
ENSG00000167858.11	6.80463	1.15307	0.38314	3.00953	0.00261653	0.00596766
ENSG00000105376.4	68.9216	1.1524	0.264365	4.35912	1.30585e-05	4.76232e-05
ENSG00000111641.9	3235.77	1.15168	0.116124	9.91768	3.48773e-23	2.32931e-21
ENSG00000151503.11	2985.42	1.15155	0.124668	9.23688	2.53785e-20	1.10002e-18
ENSG00000189325.6	1847.6	1.15146	0.313102	3.6776	0.000235442	0.000671739
ENSG00000213512.1	18.5495	1.151	0.305406	3.76877	0.000164053	0.000482862
ENSG00000106302.8	14.0093	1.1509	0.39942	2.88144	0.00395868	0.00865546
ENSG00000157856.9	19.9772	1.1508	0.348831	3.29902	0.000970218	0.00243578
ENSG00000147570.8	63.6578	1.15036	0.275144	4.18093	2.90324e-05	9.92084e-05
ENSG00000121454.5	114.442	1.1495	0.154587	7.43591	1.03848e-13	1.52281e-12
ENSG00000133106.13	3008.62	1.14891	0.204587	5.61576	1.95701e-08	1.17798e-07
ENSG00000156886.11	37.9637	1.14845	0.289498	3.96705	7.27668e-05	0.000229707
ENSG00000135960.8	690.182	1.14844	0.353268	3.25091	0.00115037	0.00284263
ENSG00000254788.5	32.9201	1.14818	0.161829	7.09498	1.29366e-12	1.58361e-11
ENSG00000213599.8	16.8753	1.14815	0.202859	5.65985	1.51506e-08	9.30215e-08
ENSG00000176678.5	381.734	1.14784	0.233744	4.91067	9.07655e-07	4.1302e-06
ENSG00000040275.15	980.486	1.14783	0.118773	9.66406	4.28556e-22	2.43904e-20
ENSG00000136824.17	2937.38	1.14762	0.128648	8.92063	4.63627e-19	1.65816e-17
ENSG00000213185.5	93.1893	1.14726	0.205299	5.58825	2.29369e-08	1.36516e-07
ENSG00000161996.16	2446.54	1.14599	0.138534	8.2723	1.31403e-16	3.15029e-15
ENSG00000278705.1	12.939	1.14548	0.250172	4.57876	4.6774e-06	1.858e-05
ENSG00000276368.1	18.2764	1.14478	0.295615	3.87254	0.000107707	0.000328542
ENSG00000275713.1	87.854	1.14431	0.290978	3.93261	8.40271e-05	0.000261885
ENSG00000133067.16	888.909	1.14421	0.386691	2.95898	0.00308662	0.00693034
ENSG00000184492.6	14.129	1.14416	0.258232	4.43075	9.39073e-06	3.52796e-05
ENSG00000124493.12	31.0489	1.14248	0.345944	3.30251	0.000958241	0.00240941
ENSG00000101850.11	135.552	1.14204	0.380762	2.99937	0.00270541	0.00615179
ENSG00000062822.11	2136.62	1.14165	0.154605	7.3843	1.5326e-13	2.18901e-12
ENSG00000214954.7	65.0618	1.14153	0.194441	5.87084	4.33594e-09	2.92162e-08
ENSG00000177291.3	4.82019	1.14141	0.340001	3.35707	0.00078772	0.00201549
ENSG00000135740.15	115.965	1.1411	0.161475	7.06672	1.58644e-12	1.91691e-11
ENSG00000107147.10	61.1011	1.14012	0.322744	3.53259	0.000411513	0.00111742
ENSG00000135100.16	1324.25	1.14007	0.215732	5.28467	1.25934e-07	6.64172e-07
ENSG00000084774.12	5815.55	1.13982	0.113645	10.0296	1.1298e-23	8.27749e-22
ENSG00000147896.3	4.22823	1.13935	0.390957	2.91426	0.00356538	0.00789336
ENSG00000267303.1	1.42635	1.13932	0.418738	2.72085	0.00651142	0.0135007
ENSG00000257743.7	4712.2	1.13932	0.367135	3.10326	0.00191399	0.0045083
ENSG00000244255.4	0.940282	1.13791	0.48598	2.34148	0.0192076	0.0353957
ENSG00000277481.1	41.4929	1.13786	0.319007	3.56688	0.000361253	0.000993863
ENSG00000133055.7	5.35021	1.1376	0.358374	3.17433	0.00150182	0.00361685
ENSG00000101187.14	2968.24	1.13673	0.234022	4.85735	1.18967e-06	5.29927e-06
ENSG00000075618.16	6511.43	1.13668	0.231384	4.91251	8.99159e-07	4.09248e-06
ENSG00000162753.11	19.6045	1.13637	0.40678	2.79356	0.00521311	0.0110683
ENSG00000279533.1	1.39361	1.13633	0.447136	2.54134	0.0110428	0.0216242
ENSG00000164199.14	140.669	1.13526	0.360777	3.14672	0.00165115	0.00394275
ENSG00000173627.7	13.1181	1.13521	0.357211	3.17796	0.00148313	0.00357667
ENSG00000108106.12	3056.97	1.13517	0.177873	6.38191	1.74898e-10	1.51216e-09
ENSG00000105479.14	38.5886	1.13495	0.286188	3.96573	7.31706e-05	0.00023087
ENSG00000184361.11	25.6313	1.13438	0.195903	5.79053	7.01628e-09	4.5527e-08
ENSG00000131019.9	129.82	1.13413	0.237975	4.76573	1.88175e-06	8.08138e-06
ENSG00000166451.12	1112.52	1.13329	0.131326	8.62957	6.15806e-18	1.88339e-16
ENSG00000185215.7	8453.01	1.13308	0.220489	5.13893	2.76303e-07	1.37696e-06
ENSG00000169750.7	491.027	1.13261	0.270902	4.18088	2.90381e-05	9.92105e-05
ENSG00000163006.10	431.543	1.13118	0.13325	8.48913	2.08198e-17	5.73346e-16
ENSG00000169385.2	66.4837	1.1298	0.266242	4.24352	2.20039e-05	7.69589e-05
ENSG00000101463.5	283.931	1.12888	0.256818	4.39564	1.10448e-05	4.0833e-05
ENSG00000144485.9	1027.28	1.12864	0.235795	4.78651	1.69705e-06	7.34118e-06
ENSG00000147592.7	2740.28	1.12845	0.187334	6.02374	1.70433e-09	1.23897e-08
ENSG00000172000.6	78.6219	1.12775	0.326856	3.4503	0.000559961	0.00148233
ENSG00000170627.8	290.547	1.12761	0.441879	2.55186	0.010715	0.0210704
ENSG00000138795.8	1166.79	1.12715	0.200352	5.62584	1.84609e-08	1.11532e-07
ENSG00000185885.14	9372.56	1.12686	0.233051	4.83523	1.3299e-06	5.86404e-06
ENSG00000119285.9	3797.21	1.12645	0.116459	9.67253	3.94503e-22	2.27158e-20
ENSG00000279282.1	2.65507	1.12638	0.487797	2.30911	0.0209376	0.0382204
ENSG00000188523.7	9.54134	1.12619	0.339401	3.31817	0.000906086	0.00228911
ENSG00000221955.9	1388.24	1.12615	0.150106	7.50235	6.26845e-14	9.59323e-13
ENSG00000113504.18	10409.3	1.1261	0.151834	7.41667	1.20103e-13	1.75072e-12
ENSG00000116032.5	40.3996	1.12592	0.263028	4.28061	1.86385e-05	6.60115e-05
ENSG00000128944.12	1182.67	1.12514	0.13469	8.35358	6.6224e-17	1.6692e-15
ENSG00000009765.13	1568.33	1.12484	0.336047	3.34726	0.000816137	0.00208142
ENSG00000250644.2	44.0776	1.12468	0.243232	4.62389	3.76618e-06	1.52404e-05
ENSG00000141736.12	28267.7	1.12456	0.284615	3.95117	7.77692e-05	0.000243968
ENSG00000261732.1	41.0093	1.12381	0.212534	5.28767	1.23886e-07	6.54252e-07
ENSG00000086717.17	33.0739	1.12317	0.242186	4.63762	3.52436e-06	1.43243e-05
ENSG00000240720.6	8.25993	1.1225	0.343743	3.26552	0.00109264	0.00271431
ENSG00000183765.19	717.302	1.12241	0.137287	8.17564	2.94296e-16	6.64195e-15
ENSG00000175305.15	353.194	1.12192	0.16018	7.0041	2.48572e-12	2.91212e-11
ENSG00000117593.9	2976.38	1.12188	0.137201	8.17693	2.9116e-16	6.57873e-15
ENSG00000135253.12	351.157	1.12128	0.254963	4.39781	1.0935e-05	4.04728e-05
ENSG00000175538.9	6050.24	1.12064	0.248952	4.50143	6.74971e-06	2.60887e-05
ENSG00000130816.13	6242.82	1.11978	0.116034	9.65043	4.89512e-22	2.7699e-20
ENSG00000183434.9	1.43701	1.11953	0.474615	2.35882	0.0183332	0.0339437
ENSG00000270276.2	5.46216	1.11894	0.322742	3.46697	0.000526356	0.00140269
ENSG00000005801.15	1652.85	1.11843	0.119586	9.35247	8.56238e-21	3.97452e-19
ENSG00000059588.8	2502.71	1.11832	0.120607	9.2725	1.81841e-20	8.09627e-19
ENSG00000270339.2	3.91621	1.1179	0.297422	3.75862	0.000170854	0.000500629
ENSG00000130707.16	13090.1	1.11747	0.247128	4.52185	6.13008e-06	2.38439e-05
ENSG00000176927.13	46.9891	1.11732	0.242231	4.6126	3.9766e-06	1.59935e-05
ENSG00000128655.15	244.235	1.11538	0.289411	3.85396	0.000116221	0.000352594
ENSG00000188372.13	292.511	1.11536	0.248749	4.48387	7.32997e-06	2.81156e-05
ENSG00000025772.7	3646.69	1.11472	0.131831	8.45571	2.77406e-17	7.46145e-16
ENSG00000196420.6	39.2462	1.1144	0.233814	4.76621	1.87724e-06	8.06378e-06
ENSG00000144959.8	4182.82	1.11386	0.173812	6.40844	1.47017e-10	1.28812e-09
ENSG00000163918.9	1155.27	1.11367	0.122118	9.11963	7.53784e-20	3.07704e-18
ENSG00000175336.9	5.15733	1.11339	0.422268	2.63669	0.00837189	0.0169379
ENSG00000113600.9	9.01707	1.11302	0.42913	2.59367	0.00949589	0.018933
ENSG00000164484.10	968.529	1.11269	0.259951	4.28038	1.86573e-05	6.60661e-05
ENSG00000006047.11	799.463	1.11234	0.312189	3.56302	0.00036661	0.00100649
ENSG00000273274.1	21.7087	1.112	0.361545	3.07569	0.00210016	0.00490329
ENSG00000114993.14	3625.54	1.10929	0.144617	7.67055	1.71257e-14	2.89135e-13
ENSG00000100350.13	3884.19	1.10881	0.19296	5.74635	9.1192e-09	5.83288e-08
ENSG00000205639.8	45.0231	1.10819	0.180051	6.15485	7.51491e-10	5.77064e-09
ENSG00000121318.2	5.72464	1.10811	0.343287	3.22795	0.00124682	0.00305786
ENSG00000203326.8	644.023	1.10787	0.191443	5.78694	7.16797e-09	4.63886e-08
ENSG00000188269.7	4.12933	1.1066	0.455659	2.42857	0.0151585	0.0286621
ENSG00000206199.8	13.0584	1.10631	0.303727	3.64245	0.000270054	0.000761088
ENSG00000160293.15	4468.14	1.1061	0.134005	8.25418	1.52954e-16	3.62275e-15
ENSG00000121335.11	2.70866	1.10567	0.500412	2.20953	0.027138	0.0481568
ENSG00000105388.13	55035.5	1.10537	0.39628	2.78935	0.00528132	0.0111937
ENSG00000173991.5	83.4045	1.10528	0.255306	4.32922	1.49639e-05	5.40699e-05
ENSG00000060982.13	1496.52	1.10471	0.232069	4.76026	1.93342e-06	8.2852e-06
ENSG00000185482.6	163.149	1.10356	0.170301	6.48001	9.17137e-11	8.36413e-10
ENSG00000164171.9	6089.47	1.10327	0.196992	5.6006	2.13609e-08	1.2795e-07
ENSG00000131044.15	31.9409	1.10184	0.239449	4.60156	4.19338e-06	1.67968e-05
ENSG00000197859.8	793.485	1.10161	0.229362	4.80293	1.56361e-06	6.8059e-06
ENSG00000175455.13	2261.21	1.10136	0.129554	8.50115	1.87722e-17	5.22825e-16
ENSG00000072274.11	13698.1	1.10111	0.179386	6.13824	8.3439e-10	6.35749e-09
ENSG00000132436.10	1085.97	1.10089	0.125853	8.74744	2.1824e-18	7.20192e-17
ENSG00000153395.8	4303.61	1.10035	0.160064	6.87445	6.22298e-12	6.84528e-11
ENSG00000166845.12	346.907	1.10026	0.143749	7.65401	1.94807e-14	3.25534e-13
ENSG00000001626.13	3497.42	1.09924	0.345951	3.17745	0.00148575	0.00358212
ENSG00000127507.16	624.715	1.09912	0.206499	5.32264	1.0227e-07	5.47457e-07
ENSG00000171989.5	23.8445	1.09875	0.23073	4.76207	1.91616e-06	8.21478e-06
ENSG00000258881.5	11.6441	1.09868	0.31464	3.49187	0.000479644	0.00128659
ENSG00000196337.9	14.2148	1.09814	0.345398	3.17936	0.00147602	0.00356127
ENSG00000176383.8	88.0592	1.0975	0.222725	4.92761	8.3241e-07	3.81343e-06
ENSG00000234289.5	6.41786	1.09712	0.352595	3.11154	0.00186112	0.00439748
ENSG00000198732.9	747.082	1.09704	0.400372	2.74004	0.00614314	0.0128061
ENSG00000176619.9	7018.85	1.09674	0.130852	8.38152	5.2248e-17	1.34808e-15
ENSG00000188782.6	5.5688	1.09614	0.495524	2.21208	0.0269609	0.0478969
ENSG00000133657.13	9851.11	1.09496	0.113065	9.68436	3.51411e-22	2.04071e-20
ENSG00000168496.3	2287.09	1.09404	0.129488	8.44897	2.93883e-17	7.8723e-16
ENSG00000120539.13	1165.5	1.09384	0.114399	9.56162	1.15929e-21	6.07004e-20
ENSG00000205116.3	8.83503	1.09372	0.463183	2.36131	0.0182107	0.0337454
ENSG00000235173.5	3002.68	1.09333	0.141099	7.74867	9.28628e-15	1.65309e-13
ENSG00000171931.11	25.1105	1.09332	0.270402	4.04332	5.26993e-05	0.000170948
ENSG00000149636.14	1409.51	1.09309	0.120229	9.0917	9.75039e-20	3.91511e-18
ENSG00000239672.6	3588.36	1.09296	0.167322	6.53208	6.48612e-11	6.0703e-10
ENSG00000185803.7	4844.01	1.09256	0.140538	7.77412	7.59748e-15	1.37813e-13
ENSG00000025708.11	7523.69	1.09227	0.208467	5.23955	1.60973e-07	8.33739e-07
ENSG00000244693.1	10.7533	1.0917	0.317	3.44385	0.000573485	0.00151553
ENSG00000006118.13	2739.78	1.0917	0.190952	5.71713	1.08339e-08	6.81422e-08
ENSG00000119614.2	3.04607	1.09169	0.475361	2.29654	0.0216451	0.0393629
ENSG00000128050.7	8259	1.09161	0.126543	8.62641	6.33058e-18	1.93112e-16
ENSG00000188676.12	17.6913	1.09107	0.303538	3.59452	0.000324994	0.000902583
ENSG00000137496.16	1618.03	1.091	0.186927	5.83652	5.33011e-09	3.53929e-08
ENSG00000127311.8	1143.69	1.09084	0.140238	7.77849	7.33953e-15	1.33437e-13
ENSG00000105655.17	2119.52	1.089	0.236841	4.59803	4.26514e-06	1.70632e-05
ENSG00000166596.13	23.425	1.08886	0.233515	4.6629	3.11782e-06	1.27831e-05
ENSG00000173213.8	13.3788	1.08879	0.379974	2.86544	0.0041643	0.00905694
ENSG00000197721.15	19.8394	1.08845	0.317631	3.42678	0.00061078	0.00160389
ENSG00000125975.12	3.59877	1.0878	0.483149	2.25147	0.0243559	0.0437256
ENSG00000280127.1	1.98964	1.08737	0.459566	2.36608	0.0179775	0.0333638
ENSG00000275126.1	6.04396	1.08728	0.360518	3.01588	0.00256238	0.00586391
ENSG00000161888.10	578.436	1.08692	0.158098	6.87497	6.20048e-12	6.82506e-11
ENSG00000131153.7	1009.86	1.0866	0.203888	5.3294	9.85387e-08	5.29504e-07
ENSG00000162878.11	4613.79	1.086	0.227203	4.77986	1.75414e-06	7.56645e-06
ENSG00000169684.12	260.139	1.08572	0.17187	6.31709	2.66527e-10	2.23166e-09
ENSG00000154153.12	2138.57	1.08405	0.248641	4.35989	1.30126e-05	4.74734e-05
ENSG00000149346.13	996.372	1.08398	0.121289	8.93716	3.99283e-19	1.45184e-17
ENSG00000104369.4	948.67	1.08373	0.281611	3.84831	0.000118934	0.000360047
ENSG00000198723.9	93.5691	1.0833	0.281735	3.84509	0.000120507	0.000364527
ENSG00000122884.11	2949.82	1.08326	0.152129	7.12065	1.07423e-12	1.33244e-11
ENSG00000134222.15	530.07	1.08319	0.16898	6.41016	1.45367e-10	1.27594e-09
ENSG00000160072.18	1443.27	1.08314	0.13713	7.89869	2.81848e-15	5.55074e-14
ENSG00000130193.7	5207.58	1.08291	0.159997	6.76829	1.30312e-11	1.3538e-10
ENSG00000174898.14	13.7651	1.08276	0.427248	2.53428	0.011268	0.0220015
ENSG00000253729.6	17650.8	1.08273	0.122709	8.82355	1.10886e-18	3.81305e-17
ENSG00000212128.2	4.77152	1.08138	0.339706	3.18328	0.00145617	0.00351771
ENSG00000188158.13	1579.35	1.08131	0.195024	5.54449	2.94809e-08	1.72071e-07
ENSG00000147082.16	79.7351	1.08073	0.261378	4.13475	3.55347e-05	0.000119249
ENSG00000175318.10	181.893	1.07961	0.265718	4.06301	4.84437e-05	0.000158638
ENSG00000267216.1	39.3997	1.0795	0.169764	6.35884	2.03288e-10	1.73924e-09
ENSG00000169213.6	1031.37	1.07937	0.32036	3.36924	0.000753755	0.00193808
ENSG00000166073.7	602.166	1.07935	0.184981	5.83494	5.38108e-09	3.56589e-08
ENSG00000198556.12	773.732	1.0786	0.141775	7.60784	2.78709e-14	4.51842e-13
ENSG00000205560.11	131.504	1.07847	0.184923	5.83197	5.47761e-09	3.61887e-08
ENSG00000080573.6	1905.43	1.07835	0.196637	5.48396	4.15898e-08	2.37044e-07
ENSG00000222047.7	51.6526	1.07786	0.224705	4.79675	1.61258e-06	7.00817e-06
ENSG00000110169.9	34.421	1.07757	0.25286	4.26152	2.03041e-05	7.15646e-05
ENSG00000130487.5	359.581	1.07714	0.295648	3.64333	0.000269132	0.000759138
ENSG00000101307.14	289.062	1.07593	0.262309	4.10179	4.09969e-05	0.000136041
ENSG00000163584.16	3669.13	1.07545	0.24074	4.46727	7.92255e-06	3.01705e-05
ENSG00000152086.8	7.65345	1.07532	0.314039	3.42415	0.000616726	0.00161804
ENSG00000049768.13	465.326	1.07483	0.206611	5.2022	1.96939e-07	1.00543e-06
ENSG00000105967.14	463.911	1.07372	0.226211	4.74654	2.0693e-06	8.81552e-06
ENSG00000166926.7	2.79172	1.07366	0.431515	2.48811	0.0128422	0.0246802
ENSG00000273703.1	19.0068	1.07343	0.318908	3.36597	0.000762754	0.00195876
ENSG00000163462.16	168.887	1.07326	0.211636	5.07125	3.95207e-07	1.91792e-06
ENSG00000095002.11	1949.14	1.07295	0.116941	9.17514	4.50992e-20	1.90435e-18
ENSG00000124207.15	9531.56	1.07256	0.12275	8.73782	2.37651e-18	7.80313e-17
ENSG00000134460.14	473.96	1.07238	0.228643	4.69018	2.72966e-06	1.13193e-05
ENSG00000144671.9	11.0369	1.07145	0.304898	3.51414	0.000441181	0.00119139
ENSG00000054598.6	2001.03	1.07123	0.239427	4.47415	7.67144e-06	2.92995e-05
ENSG00000155886.10	59.1492	1.07062	0.320753	3.33784	0.000844313	0.00214687
ENSG00000125869.8	200.065	1.07018	0.309685	3.45571	0.000548842	0.00145609
ENSG00000184357.4	42.9828	1.06904	0.294916	3.62489	0.000289084	0.000810302
ENSG00000165732.11	9805.39	1.06849	0.110914	9.63353	5.77119e-22	3.22841e-20
ENSG00000118322.11	5874.71	1.06835	0.323248	3.30505	0.000949595	0.00239042
ENSG00000167088.9	4273.22	1.0683	0.145893	7.32247	2.43456e-13	3.38546e-12
ENSG00000137731.12	64.3007	1.06818	0.379676	2.81341	0.00490195	0.0104802
ENSG00000243449.5	771.887	1.06775	0.242117	4.41005	1.03349e-05	3.85057e-05
ENSG00000105821.13	2324.28	1.06755	0.124267	8.59078	8.63832e-18	2.56601e-16
ENSG00000187595.13	111.454	1.06741	0.263077	4.05739	4.96232e-05	0.000161933
ENSG00000180116.14	5.85959	1.067	0.394062	2.7077	0.00677513	0.0139943
ENSG00000105486.12	2311.37	1.06698	0.133956	7.96511	1.65077e-15	3.39046e-14
ENSG00000183831.6	48.0055	1.06629	0.343671	3.10264	0.00191802	0.00451687
ENSG00000233822.4	163.932	1.0662	0.18678	5.70829	1.14114e-08	7.16312e-08
ENSG00000158806.12	100.486	1.06613	0.271203	3.9311	8.4557e-05	0.000263327
ENSG00000162571.12	42.9347	1.06607	0.241231	4.4193	9.90224e-06	3.70273e-05
ENSG00000166105.14	39.0279	1.06508	0.400523	2.65922	0.00783212	0.0159345
ENSG00000261594.3	112.659	1.06447	0.240433	4.42731	9.54147e-06	3.57873e-05
ENSG00000163618.16	526.567	1.06443	0.392436	2.71236	0.00668064	0.013818
ENSG00000175265.16	1474.06	1.06411	0.226713	4.69364	2.68384e-06	1.11505e-05
ENSG00000135048.12	8183.27	1.06409	0.154167	6.90224	5.11905e-12	5.71418e-11
ENSG00000007306.13	2108.19	1.06363	0.461878	2.30284	0.0212879	0.0387853
ENSG00000204839.7	3377.89	1.06295	0.239795	4.43274	9.30433e-06	3.49797e-05
ENSG00000278966.1	4.71446	1.0629	0.299756	3.54589	0.000391294	0.00106783
ENSG00000189007.14	677.929	1.06267	0.149719	7.09775	1.26802e-12	1.55416e-11
ENSG00000175054.13	2288.23	1.06255	0.119262	8.90934	5.13382e-19	1.82283e-17
ENSG00000112578.8	1214.3	1.06236	0.131176	8.09871	5.55429e-16	1.20908e-14
ENSG00000196411.8	7774.54	1.06225	0.137738	7.71212	1.23749e-14	2.13703e-13
ENSG00000205307.9	22.6672	1.06225	0.263661	4.02884	5.60537e-05	0.000180778
ENSG00000171316.10	3744.86	1.0612	0.134806	7.87202	3.48968e-15	6.71106e-14
ENSG00000184307.12	1039.57	1.06091	0.147157	7.20939	5.62035e-13	7.31801e-12
ENSG00000127364.3	30.9624	1.05997	0.216973	4.88527	1.03286e-06	4.6608e-06
ENSG00000130589.15	9808.55	1.05868	0.159855	6.62274	3.52598e-11	3.42397e-10
ENSG00000078328.18	14.223	1.05822	0.424537	2.49265	0.0126792	0.0244051
ENSG00000165752.15	673.076	1.05803	0.18606	5.68652	1.29652e-08	8.06119e-08
ENSG00000139880.18	754.393	1.05794	0.137535	7.69216	1.44672e-14	2.47442e-13
ENSG00000157827.18	3081.57	1.05786	0.128592	8.22648	1.92796e-16	4.49591e-15
ENSG00000205336.10	12626.1	1.0577	0.183555	5.76231	8.29685e-09	5.33602e-08
ENSG00000197360.8	17.175	1.0574	0.467561	2.26152	0.0237271	0.0427141
ENSG00000114656.9	173.136	1.05725	0.267771	3.94835	7.86923e-05	0.000246588
ENSG00000196187.10	9678.55	1.05667	0.134964	7.82929	4.90616e-15	9.15793e-14
ENSG00000007062.10	5709.03	1.05634	0.305002	3.46337	0.000533456	0.00141949
ENSG00000164287.11	12.1034	1.05577	0.378827	2.78695	0.00532074	0.0112688
ENSG00000114554.10	7071.33	1.05568	0.134013	7.87745	3.34135e-15	6.43841e-14
ENSG00000254997.3	8.47013	1.05547	0.320629	3.29186	0.000995263	0.00249419
ENSG00000170893.3	6.95782	1.05532	0.365857	2.88452	0.00392011	0.00858194
ENSG00000176083.16	241.807	1.05528	0.333975	3.15975	0.00157905	0.00378567
ENSG00000153044.8	525.279	1.05501	0.149171	7.0725	1.52165e-12	1.84658e-11
ENSG00000163116.8	13.2294	1.05455	0.340401	3.09797	0.00194852	0.00458084
ENSG00000073008.13	4789.71	1.05403	0.150873	6.98618	2.8247e-12	3.27795e-11
ENSG00000160207.7	38.2231	1.05392	0.225202	4.67988	2.8704e-06	1.18429e-05
ENSG00000273331.1	2.51214	1.05338	0.365813	2.87955	0.00398246	0.00870194
ENSG00000137462.6	734.971	1.05321	0.180133	5.84686	5.00948e-09	3.34448e-08
ENSG00000119630.12	682.029	1.0528	0.173127	6.0811	1.19359e-09	8.90189e-09
[truncated: 2,467 more rows]

## Sheet: Table S3
Table S3. Differentially expressed lncRNAs among gastric cancer tissues.
ID	baseMean	log2FoldChange	lfcSE	stat	pvalue	padj
ENSG00000229967.1	29.8704	9.73429	1.03315	9.42194	4.42834e-21	9.56681e-19
ENSG00000228437.4	100.459	6.5942	0.678448	9.71954	2.4891e-22	6.69182e-20
ENSG00000249550.5	258.713	6.57874	0.514865	12.7776	2.1875e-37	8.82144e-34
ENSG00000251151.2	52.1666	6.42177	0.551621	11.6416	2.53138e-31	3.06247e-28
ENSG00000250920.1	213.01	6.37046	0.81153	7.84994	4.16222e-15	2.79747e-13
ENSG00000225548.4	47.2643	6.20499	0.746261	8.31477	9.19298e-17	8.82299e-15
ENSG00000228295.1	40.4531	6.03411	0.932184	6.47309	9.60159e-11	2.35619e-09
ENSG00000251026.1	28.5701	5.8947	0.51906	11.3565	6.88568e-30	6.94192e-27
ENSG00000266602.1	19.9602	5.80544	0.763947	7.59927	2.97804e-14	1.61562e-12
ENSG00000227932.1	39.7927	5.68313	0.814341	6.9788	2.97702e-12	1.03198e-10
ENSG00000224271.4	35.103	5.62268	0.610255	9.21366	3.15201e-20	5.77773e-18
ENSG00000228630.4	181.238	5.49537	0.418923	13.1178	2.60266e-39	1.57435e-35
ENSG00000250874.1	12.2267	5.48009	0.744918	7.35663	1.88604e-13	8.70892e-12
ENSG00000249196.5	43.0097	5.36968	0.775895	6.92063	4.4965e-12	1.49859e-10
ENSG00000248131.4	22.7319	5.31968	0.84823	6.27151	3.5757e-10	7.85096e-09
ENSG00000253363.4	17.2713	5.25021	0.838541	6.26112	3.8221e-10	8.31651e-09
ENSG00000227674.1	39.9434	5.20607	0.662302	7.86056	3.82414e-15	2.59913e-13
ENSG00000259485.1	79.5608	5.20509	0.648672	8.02422	1.02171e-15	7.8232e-14
ENSG00000197085.10	50.7642	5.19658	0.470845	11.0367	2.5415e-28	1.80865e-25
ENSG00000229970.3	54.9711	5.19129	0.413331	12.5597	3.5187e-36	1.06423e-32
ENSG00000271216.1	10.0916	5.1052	0.525687	9.71148	2.69386e-22	7.08486e-20
ENSG00000263711.4	189.583	5.02767	0.651756	7.71404	1.21893e-14	7.15857e-13
ENSG00000214039.7	109.113	4.96392	0.609105	8.14953	3.65337e-16	3.06934e-14
ENSG00000223812.4	10.9826	4.94127	0.773608	6.38731	1.6883e-10	3.91285e-09
ENSG00000257869.1	8.59989	4.88042	0.763635	6.39104	1.64763e-10	3.82591e-09
ENSG00000235277.1	17.3037	4.88031	0.554634	8.79915	1.37853e-18	1.77419e-16
ENSG00000231172.2	15.717	4.86453	0.651993	7.46102	8.58531e-14	4.17487e-12
ENSG00000251577.4	9.66765	4.85143	0.896302	5.41272	6.20762e-08	7.22809e-07
ENSG00000237978.4	77.2802	4.84406	0.435101	11.1332	8.64687e-29	6.53812e-26
ENSG00000266869.1	15.5278	4.8256	0.603368	7.99777	1.26694e-15	9.40333e-14
ENSG00000249001.4	14.3943	4.82402	0.566706	8.51238	1.70393e-17	1.94473e-15
ENSG00000272328.1	24.4888	4.77683	0.457785	10.4347	1.72238e-25	7.41766e-23
ENSG00000230838.1	55.2972	4.75484	0.431142	11.0285	2.78506e-28	1.87187e-25
ENSG00000255666.4	16.8549	4.71747	0.603686	7.81444	5.52084e-15	3.55272e-13
ENSG00000251144.1	7.22341	4.71542	0.617424	7.63725	2.21912e-14	1.24291e-12
ENSG00000259439.2	218.015	4.71063	0.44558	10.5719	4.02288e-26	2.02787e-23
ENSG00000266401.1	22.6454	4.70338	0.493196	9.53653	1.47692e-21	3.50348e-19
ENSG00000250133.2	64.0935	4.70262	0.320324	14.6808	8.55516e-49	1.035e-44
ENSG00000233515.1	9.92066	4.69418	0.777377	6.03848	1.55569e-09	2.85163e-08
ENSG00000228742.8	151.262	4.67815	0.391587	11.9466	6.76132e-33	1.02248e-29
ENSG00000230426.2	8.25723	4.62792	0.860838	5.37606	7.61324e-08	8.64836e-07
ENSG00000271127.1	6.62819	4.59474	0.5399	8.51035	1.73415e-17	1.96072e-15
ENSG00000236347.1	13.2474	4.56934	0.5656	8.07873	6.54425e-16	5.2087e-14
ENSG00000261780.2	31.309	4.55887	0.704539	6.47071	9.75414e-11	2.38878e-09
ENSG00000260476.1	6.03444	4.55864	0.577409	7.89499	2.90344e-15	2.03039e-13
ENSG00000251095.5	91.3595	4.53366	0.515075	8.80195	1.34461e-18	1.74915e-16
ENSG00000224789.1	24.318	4.53074	0.434327	10.4316	1.77808e-25	7.41766e-23
ENSG00000233854.1	11.2006	4.45349	0.760925	5.85273	4.83567e-09	7.8526e-08
ENSG00000280953.1	9.48439	4.43648	0.621942	7.13328	9.80076e-13	3.76838e-11
ENSG00000275216.1	791.701	4.41226	0.529401	8.33444	7.78669e-17	7.53627e-15
ENSG00000266976.1	25.8322	4.3826	0.649394	6.74876	1.49116e-11	4.45433e-10
ENSG00000230316.5	326.36	4.3632	0.389615	11.1987	4.13539e-29	3.84846e-26
ENSG00000253898.1	9.05129	4.35982	0.702256	6.20831	5.35572e-10	1.0982e-08
ENSG00000230234.1	5.28377	4.35727	0.806736	5.40111	6.62294e-08	7.66739e-07
ENSG00000239513.4	10.9601	4.33831	0.669738	6.47762	9.3178e-11	2.29119e-09
ENSG00000267284.1	8.98783	4.33252	0.809319	5.35329	8.63699e-08	9.6752e-07
ENSG00000235934.1	6.68363	4.32747	0.57962	7.46605	8.26366e-14	4.08056e-12
ENSG00000224817.1	22.6546	4.31453	0.518955	8.31388	9.26203e-17	8.82299e-15
ENSG00000250284.1	5.09341	4.30526	0.99922	4.30862	1.64276e-05	9.90542e-05
ENSG00000277268.1	10.4689	4.29486	0.671583	6.39514	1.60404e-10	3.74628e-09
ENSG00000260597.1	42.6826	4.28175	0.382814	11.1849	4.83293e-29	4.17634e-26
ENSG00000225546.4	7.74119	4.24878	0.797458	5.3279	9.93564e-08	1.09673e-06
ENSG00000279343.1	6.70872	4.23384	0.738323	5.73439	9.78624e-09	1.46052e-07
ENSG00000229404.4	59.8673	4.22444	0.429652	9.83224	8.17777e-23	2.24852e-20
ENSG00000277223.1	8.04313	4.20587	0.591121	7.11508	1.11849e-12	4.26859e-11
ENSG00000230834.1	20.9903	4.16489	0.505009	8.24716	1.62201e-16	1.50946e-14
ENSG00000232023.2	8.60627	4.15876	0.821387	5.06309	4.12514e-07	3.88978e-06
ENSG00000250590.4	6.73884	4.14796	0.789545	5.25361	1.49151e-07	1.54881e-06
ENSG00000260976.1	5.1452	4.13762	0.57878	7.14887	8.74978e-13	3.43685e-11
ENSG00000248461.1	12.2209	4.13407	0.801787	5.15607	2.52185e-07	2.50281e-06
ENSG00000248783.1	6.70074	4.12203	0.933204	4.41707	1.00048e-05	6.33709e-05
ENSG00000248973.1	4.44641	4.11929	0.878413	4.68947	2.73918e-06	2.05575e-05
ENSG00000249413.2	6.63756	4.11375	0.681772	6.03391	1.60039e-09	2.92028e-08
ENSG00000224899.1	8.26788	4.10027	0.687458	5.96439	2.45547e-09	4.26814e-08
ENSG00000250337.4	85.7003	4.09851	0.483115	8.4835	2.18521e-17	2.38168e-15
ENSG00000237713.1	5.20515	4.06491	0.624682	6.50717	7.65794e-11	1.94661e-09
ENSG00000279516.1	11.2307	4.06484	1.00458	4.04631	5.20312e-05	0.000274099
ENSG00000233536.2	8.65168	4.05762	0.535509	7.57713	3.53283e-14	1.87457e-12
ENSG00000279712.1	17.8117	4.05094	0.524926	7.71716	1.18954e-14	7.02001e-13
ENSG00000231976.6	15.0229	4.05053	0.609867	6.64166	3.10175e-11	8.54782e-10
ENSG00000249641.2	16.3347	4.04682	0.700107	5.78028	7.45752e-09	1.15078e-07
ENSG00000261146.1	7.10983	4.0461	0.732325	5.525	3.29477e-08	4.12631e-07
ENSG00000253187.2	63.5619	4.03864	0.426437	9.47065	2.78115e-21	6.2308e-19
ENSG00000233379.1	5.83154	4.03646	0.750615	5.37754	7.55097e-08	8.59376e-07
ENSG00000236117.1	4.3951	4.00703	0.892854	4.48789	7.19325e-06	4.71164e-05
ENSG00000260834.1	6.5782	4.00387	0.774673	5.16846	2.36025e-07	2.35986e-06
ENSG00000261039.2	15.5305	3.99019	0.491755	8.11419	4.89054e-16	3.97086e-14
ENSG00000253584.1	4.3227	3.97587	0.832596	4.77528	1.79462e-06	1.40982e-05
ENSG00000248362.1	4.31927	3.96757	0.626183	6.33612	2.35623e-10	5.3582e-09
ENSG00000231776.4	7.7733	3.95157	0.733449	5.38765	7.13841e-08	8.18118e-07
ENSG00000257636.5	18.8182	3.91868	0.531562	7.37201	1.68073e-13	7.8812e-12
ENSG00000279774.1	5.68835	3.91263	0.630618	6.20443	5.48964e-10	1.12185e-08
ENSG00000228496.1	4.66227	3.89494	0.686723	5.67178	1.41324e-08	2.01383e-07
ENSG00000229618.1	25.7044	3.89464	0.538397	7.23377	4.69754e-13	1.96646e-11
ENSG00000253405.1	7.51467	3.89256	0.643241	6.05148	1.43525e-09	2.66313e-08
ENSG00000253554.4	6.4605	3.88331	0.688051	5.64393	1.66213e-08	2.31398e-07
ENSG00000204460.3	6.41188	3.8543	0.851996	4.52385	6.07244e-06	4.07005e-05
ENSG00000254287.1	21.0196	3.84626	0.492804	7.80485	5.95739e-15	3.75378e-13
ENSG00000234426.1	3.8972	3.83311	1.11866	3.42652	0.000611377	0.00232428
ENSG00000229642.1	6.1598	3.82308	0.728326	5.24913	1.5282e-07	1.58153e-06
ENSG00000274840.3	8.52851	3.80856	0.788463	4.83035	1.36291e-06	1.10364e-05
ENSG00000268941.2	10.4745	3.77134	0.442263	8.52737	1.49715e-17	1.74159e-15
ENSG00000257842.4	16.6459	3.76243	0.701445	5.36383	8.14747e-08	9.17433e-07
ENSG00000250697.1	14.3736	3.75816	0.605604	6.20564	5.44734e-10	1.11509e-08
ENSG00000228714.2	3.68301	3.74086	0.969433	3.85881	0.000113941	0.00054155
ENSG00000248510.2	7.19445	3.73478	0.748276	4.99118	6.00107e-07	5.38184e-06
ENSG00000232524.1	4.4211	3.71837	0.534801	6.95281	3.5808e-12	1.2203e-10
ENSG00000250546.4	16.5211	3.71223	0.636046	5.83642	5.33337e-09	8.5348e-08
ENSG00000260015.1	27.8121	3.71023	0.514764	7.20762	5.69374e-13	2.32629e-11
ENSG00000272046.1	13.0567	3.70931	0.81644	4.54328	5.53867e-06	3.75178e-05
ENSG00000253227.1	17.4704	3.70223	0.52209	7.09116	1.32989e-12	4.97168e-11
ENSG00000264080.1	3.48516	3.67277	0.868458	4.22907	2.34655e-05	0.000136221
ENSG00000223486.1	27.6719	3.66203	0.497193	7.36542	1.76595e-13	8.18563e-12
ENSG00000250519.5	9.35271	3.65279	0.504321	7.24299	4.38899e-13	1.85011e-11
ENSG00000229323.1	4.95753	3.63561	0.445235	8.16559	3.19856e-16	2.74441e-14
ENSG00000224141.4	12.2918	3.6231	0.797035	4.54573	5.47463e-06	3.72018e-05
ENSG00000136275.9	4.71245	3.61514	0.499289	7.24058	4.46762e-13	1.87671e-11
ENSG00000258314.3	3.14691	3.61017	0.737372	4.896	9.78094e-07	8.22878e-06
ENSG00000235385.1	12.6967	3.59242	0.474601	7.56934	3.75114e-14	1.9731e-12
ENSG00000277693.1	8.34228	3.58692	0.785192	4.56821	4.91902e-06	3.39865e-05
ENSG00000214691.7	37.0938	3.58018	0.517014	6.92472	4.36841e-12	1.45992e-10
ENSG00000263745.4	18.0543	3.57186	0.442521	8.07161	6.93794e-16	5.48596e-14
ENSG00000254998.1	5.26854	3.56642	0.663153	5.37797	7.5331e-08	8.58149e-07
ENSG00000248363.4	9.52814	3.56356	0.751568	4.7415	2.1214e-06	1.63469e-05
ENSG00000225255.5	5.13776	3.56038	0.689807	5.16142	2.45081e-07	2.44032e-06
ENSG00000261742.4	8.47167	3.54627	0.477434	7.42776	1.10452e-13	5.30321e-12
ENSG00000250735.4	4.8465	3.54602	0.718804	4.93322	8.08842e-07	6.96964e-06
ENSG00000237534.1	2.9531	3.52487	1.2191	2.89137	0.00383565	0.0111547
ENSG00000262768.2	5.60608	3.51563	0.570932	6.15772	7.38019e-10	1.47579e-08
ENSG00000251138.5	15.3216	3.51496	0.478788	7.34137	2.11419e-13	9.57957e-12
ENSG00000235493.1	8.85312	3.50953	0.592206	5.9262	3.10029e-09	5.28272e-08
ENSG00000234362.4	19.0394	3.49648	0.385112	9.07911	1.09464e-19	1.75059e-17
ENSG00000206195.9	332.787	3.48921	0.288668	12.0873	1.23334e-33	2.48682e-30
ENSG00000257185.1	4.28713	3.48846	0.796536	4.37954	1.18928e-05	7.40883e-05
ENSG00000253838.1	16.5741	3.48619	0.541239	6.44114	1.18582e-10	2.83519e-09
ENSG00000237686.5	171.536	3.48276	0.324764	10.724	7.85531e-27	4.5254e-24
ENSG00000250451.4	31.2733	3.46272	0.344244	10.0589	8.39302e-24	2.82052e-21
ENSG00000260757.1	9.28349	3.46081	0.425358	8.13623	4.07763e-16	3.40215e-14
ENSG00000231826.4	337.508	3.45944	0.515814	6.70675	1.99e-11	5.74583e-10
ENSG00000278630.1	4.18468	3.45874	1.04112	3.32215	0.000893276	0.00323365
ENSG00000240990.8	208.675	3.45127	0.431908	7.99075	1.34118e-15	9.83367e-14
ENSG00000248103.1	13.3288	3.43594	0.551118	6.23449	4.53242e-10	9.47033e-09
ENSG00000254233.1	30.1774	3.41716	0.455524	7.5016	6.30441e-14	3.16476e-12
ENSG00000223608.1	2.90027	3.40348	1.10527	3.07932	0.00207471	0.00663841
ENSG00000258331.1	3.79072	3.39728	0.72876	4.66173	3.13565e-06	2.3117e-05
ENSG00000228933.6	7.53346	3.39712	0.596369	5.69633	1.22416e-08	1.77152e-07
ENSG00000258028.1	2.6896	3.39174	1.01958	3.32659	0.000879145	0.00318631
ENSG00000231476.1	4.56182	3.39011	0.898207	3.77431	0.000160453	0.000728938
ENSG00000254349.4	14.7227	3.38989	0.485138	6.98748	2.79873e-12	9.78586e-11
ENSG00000214049.6	1443.17	3.37994	0.455043	7.42774	1.10465e-13	5.30321e-12
ENSG00000240086.4	12.6713	3.37429	0.589664	5.7224	1.05033e-08	1.55721e-07
ENSG00000235884.3	187.831	3.36032	0.372828	9.01308	2.00357e-19	3.0299e-17
ENSG00000249275.1	4.58681	3.34197	0.517151	6.46227	1.03147e-10	2.50075e-09
ENSG00000232192.1	23.7235	3.33609	0.348896	9.56186	1.1566e-21	2.79851e-19
ENSG00000233542.1	17.6536	3.33588	0.369007	9.04015	1.56463e-19	2.42678e-17
ENSG00000270372.1	30.5577	3.33266	0.562911	5.9204	3.21161e-09	5.42066e-08
ENSG00000280623.1	26.9255	3.32995	0.585828	5.68417	1.31447e-08	1.8909e-07
ENSG00000237265.4	2.95203	3.32936	0.849995	3.91691	8.96898e-05	0.000439476
ENSG00000250256.1	4.43064	3.32844	0.547871	6.07521	1.23823e-09	2.34798e-08
ENSG00000237087.1	3.30443	3.31471	0.649842	5.10079	3.38239e-07	3.25279e-06
ENSG00000224559.2	14.5425	3.30985	0.555866	5.9544	2.61027e-09	4.52421e-08
ENSG00000260763.1	6.16251	3.30544	0.654776	5.04819	4.46006e-07	4.157e-06
ENSG00000268621.4	151.006	3.30288	0.548696	6.0195	1.74952e-09	3.15435e-08
ENSG00000251629.5	9.83441	3.29773	0.732747	4.5005	6.77944e-06	4.48429e-05
ENSG00000213468.3	64.0309	3.29726	0.316734	10.4102	2.22763e-25	8.6935e-23
ENSG00000204832.8	56.5311	3.29219	0.579052	5.68549	1.30438e-08	1.87862e-07
ENSG00000238107.1	33.7288	3.2795	0.5265	6.22886	4.69828e-10	9.76628e-09
ENSG00000232197.1	3.0198	3.27147	0.798169	4.09873	4.15432e-05	0.00022387
ENSG00000229941.4	3.99833	3.26926	0.613551	5.32842	9.90709e-08	1.09458e-06
ENSG00000258038.4	12.0466	3.26802	0.705047	4.63519	3.56612e-06	2.584e-05
ENSG00000279136.1	2.79529	3.26739	0.660729	4.94513	7.60914e-07	6.61793e-06
ENSG00000253706.4	27.0526	3.26626	0.514574	6.34751	2.18822e-10	4.99492e-09
ENSG00000240661.1	5.63598	3.25002	0.528228	6.15268	7.61868e-10	1.511e-08
ENSG00000262117.4	10.7623	3.2429	0.673478	4.81515	1.47088e-06	1.18002e-05
ENSG00000205634.5	5.39227	3.24096	0.652818	4.96456	6.8856e-07	6.04952e-06
ENSG00000248740.4	17.0358	3.23937	0.586689	5.52143	3.36243e-08	4.20234e-07
ENSG00000263567.1	2.40676	3.22746	0.709986	4.54581	5.47251e-06	3.72018e-05
ENSG00000261650.1	3.33264	3.21652	0.865632	3.7158	0.000202559	0.000889818
ENSG00000240476.1	5.13414	3.21338	0.775902	4.14148	3.45074e-05	0.000190152
ENSG00000249803.4	3.31348	3.20358	0.76828	4.16981	3.04855e-05	0.000170985
ENSG00000255226.1	5.68926	3.18874	0.668273	4.77161	1.82756e-06	1.43291e-05
ENSG00000246876.5	4.27117	3.18013	0.756949	4.20124	2.65452e-05	0.000151127
ENSG00000257883.1	23.8741	3.17682	0.618674	5.13489	2.82312e-07	2.76643e-06
ENSG00000279949.1	7.75	3.16531	0.46165	6.85653	7.05544e-12	2.27618e-10
ENSG00000259977.1	3.97231	3.16323	0.653135	4.84315	1.27799e-06	1.04474e-05
ENSG00000234296.1	3.43663	3.16256	0.81833	3.86465	0.000111248	0.000530081
ENSG00000263082.1	3.97996	3.15637	0.754453	4.18365	2.86867e-05	0.000162098
ENSG00000277945.1	4.46821	3.14419	0.536622	5.85923	4.65025e-09	7.58203e-08
ENSG00000257642.1	3.13427	3.14071	0.592559	5.30024	1.15648e-07	1.25256e-06
ENSG00000251281.1	2.43143	3.13856	0.739671	4.24318	2.20374e-05	0.000128672
ENSG00000229243.1	3.55812	3.11839	0.58613	5.3203	1.03596e-07	1.1373e-06
ENSG00000249049.1	4.29719	3.11748	0.681442	4.57483	4.76602e-06	3.30805e-05
ENSG00000244468.1	44.0894	3.11623	0.54683	5.69872	1.20711e-08	1.75313e-07
ENSG00000233682.3	11.7944	3.11377	0.417158	7.46424	8.37795e-14	4.10614e-12
ENSG00000259129.4	44.3724	3.11188	0.67623	4.60181	4.18831e-06	2.96599e-05
ENSG00000253308.2	4.22707	3.11166	0.634338	4.90537	9.32519e-07	7.91692e-06
ENSG00000204603.5	4.48888	3.10836	0.740372	4.19837	2.68843e-05	0.000152841
ENSG00000259664.2	20.7436	3.10688	0.539309	5.76085	8.36912e-09	1.28002e-07
ENSG00000254111.2	5.18496	3.10587	0.550579	5.64109	1.68981e-08	2.33638e-07
ENSG00000233539.4	9.26174	3.09973	0.495121	6.26056	3.83606e-10	8.33189e-09
ENSG00000237764.2	2.66718	3.09205	0.672094	4.60062	4.21236e-06	2.97844e-05
ENSG00000230725.4	8.98833	3.0918	0.578177	5.34749	8.9183e-08	9.94411e-07
ENSG00000261327.4	25.394	3.08418	0.344398	8.95527	3.38917e-19	4.94003e-17
ENSG00000253649.2	70.1763	3.06988	0.376422	8.15543	3.47927e-16	2.94351e-14
ENSG00000223829.4	16.575	3.06263	0.575856	5.31841	1.04681e-07	1.14712e-06
ENSG00000258815.1	13.6579	3.06196	0.638857	4.79288	1.64406e-06	1.3034e-05
ENSG00000273232.1	9.48229	3.05461	0.422374	7.23199	4.75983e-13	1.98567e-11
ENSG00000231291.3	2.77602	3.05417	0.814559	3.74948	0.000177202	0.000792529
ENSG00000231532.4	3.64157	3.04671	0.737848	4.12919	3.64051e-05	0.000199289
ENSG00000240893.1	7.95514	3.04532	0.520197	5.85416	4.79434e-09	7.80645e-08
ENSG00000228573.1	3.38385	3.04338	0.539456	5.64156	1.68514e-08	2.33259e-07
ENSG00000205293.3	11.2766	3.03389	0.646556	4.69239	2.70034e-06	2.03164e-05
ENSG00000203446.2	17.5965	3.03049	0.327571	9.25141	2.21557e-20	4.32323e-18
ENSG00000260542.1	2.90766	3.02581	0.662976	4.56398	5.01936e-06	3.46007e-05
ENSG00000272872.1	13.7131	3.02551	0.401758	7.53069	5.04747e-14	2.56573e-12
ENSG00000258867.4	47.6382	3.0242	0.372113	8.12711	4.39655e-16	3.61833e-14
ENSG00000223669.1	10.5323	3.02089	0.509838	5.9252	3.11916e-09	5.29995e-08
ENSG00000253666.1	10.4681	3.01421	0.49064	6.14343	8.07578e-10	1.59381e-08
ENSG00000231764.7	100.3	3.0108	0.448233	6.71705	1.85445e-11	5.41911e-10
ENSG00000249916.1	4.55401	3.01009	0.561067	5.36495	8.09723e-08	9.12957e-07
ENSG00000248685.4	3.5834	3.00556	0.992028	3.02972	0.00244783	0.00765611
ENSG00000251320.1	3.50208	3.0035	0.580458	5.17436	2.28691e-07	2.29602e-06
ENSG00000197301.6	105.308	2.99839	0.291686	10.2795	8.71752e-25	3.29577e-22
ENSG00000259023.2	8.62843	2.99655	0.601529	4.98155	6.30762e-07	5.61926e-06
ENSG00000251185.1	3.31031	2.9919	0.766811	3.90175	9.55e-05	0.000464325
ENSG00000231196.3	53.972	2.98998	0.504058	5.93182	2.9959e-09	5.14106e-08
ENSG00000266560.4	3.03566	2.98731	0.789615	3.78325	0.000154794	0.000707479
ENSG00000215023.2	6.69245	2.98586	0.528209	5.65281	1.57848e-08	2.20768e-07
ENSG00000248370.1	2.47734	2.98383	1.05495	2.8284	0.00467815	0.0131926
ENSG00000235142.6	334.29	2.98281	0.40818	7.30759	2.71984e-13	1.2009e-11
ENSG00000224272.2	55.1584	2.98228	0.374662	7.95992	1.72146e-15	1.23232e-13
ENSG00000259518.1	5.03411	2.98111	0.528648	5.63912	1.70924e-08	2.35249e-07
ENSG00000260289.1	2.31257	2.98002	0.641767	4.64346	3.42621e-06	2.494e-05
ENSG00000277128.1	4.74894	2.97324	0.513345	5.7919	6.95935e-09	1.0808e-07
ENSG00000243810.1	5.88064	2.97178	0.532086	5.58514	2.33511e-08	3.08408e-07
ENSG00000274979.1	444.209	2.96994	0.351591	8.44715	2.9849e-17	3.19569e-15
ENSG00000233358.2	2.77995	2.96905	0.848439	3.49943	0.000466254	0.00184398
ENSG00000227066.1	66.5633	2.96153	0.386427	7.66389	1.80384e-14	1.02938e-12
ENSG00000279525.1	4.6352	2.96079	0.753194	3.93098	8.4602e-05	0.000418103
ENSG00000279032.1	3.4777	2.96046	0.643062	4.60369	4.15062e-06	2.94339e-05
ENSG00000275944.1	9.98337	2.95974	0.444982	6.65138	2.90349e-11	8.03809e-10
ENSG00000266450.1	2.5835	2.95218	0.775106	3.80875	0.000139673	0.000648412
ENSG00000225882.1	3.11986	2.95118	0.782793	3.77006	0.000163206	0.000738671
ENSG00000236212.1	2.37788	2.94417	0.58924	4.99656	5.83633e-07	5.26496e-06
ENSG00000224294.1	4.4564	2.94263	0.679607	4.3299	1.49179e-05	9.06464e-05
ENSG00000257191.1	12.4187	2.94235	0.557614	5.27669	1.31538e-07	1.39837e-06
ENSG00000257391.1	5.34472	2.94123	0.538374	5.46318	4.67691e-08	5.62439e-07
ENSG00000230061.2	241.108	2.94103	0.330702	8.8933	5.93219e-19	8.15542e-17
ENSG00000254367.4	28.4811	2.93957	0.39978	7.35297	1.93852e-13	8.8499e-12
ENSG00000224857.1	2.35751	2.93795	0.509774	5.76323	8.25185e-09	1.26368e-07
ENSG00000266830.1	3.64231	2.9333	0.783593	3.7434	0.00018155	0.000808386
ENSG00000248238.1	2.89307	2.92221	0.657733	4.44285	8.87746e-06	5.69155e-05
ENSG00000242407.1	29.8696	2.92089	0.649866	4.49461	6.96974e-06	4.5851e-05
ENSG00000278910.2	11.125	2.92053	0.504011	5.79458	6.84916e-09	1.0678e-07
ENSG00000253929.1	12.9632	2.91934	0.444927	6.56138	5.33109e-11	1.40513e-09
ENSG00000250102.4	3.13692	2.91868	0.997022	2.9274	0.00341812	0.0101081
ENSG00000248538.5	137.672	2.91717	0.445918	6.54195	6.07208e-11	1.56631e-09
ENSG00000241544.1	3.37817	2.91631	0.48817	5.97396	2.31559e-09	4.04827e-08
ENSG00000197308.7	4.32841	2.91005	0.535928	5.42993	5.63766e-08	6.62823e-07
ENSG00000233392.4	35.4292	2.90886	0.486744	5.97616	2.28458e-09	4.01727e-08
ENSG00000278958.1	1.9311	2.9087	0.659174	4.41264	1.02118e-05	6.45804e-05
ENSG00000236841.6	17.0021	2.90675	0.317439	9.15687	5.34248e-20	9.50491e-18
ENSG00000258919.1	12.5702	2.9017	0.427454	6.78832	1.13445e-11	3.4894e-10
ENSG00000248515.1	4.23508	2.89916	0.787589	3.68105	0.000232272	0.00100322
ENSG00000274895.1	16.085	2.89383	0.491677	5.88564	3.96526e-09	6.56248e-08
ENSG00000266885.1	3.61623	2.88844	0.929762	3.10664	0.00189227	0.00613579
ENSG00000250564.1	19.4028	2.88175	0.635477	4.53479	5.76609e-06	3.89276e-05
ENSG00000260242.1	2.2999	2.87983	0.92231	3.12241	0.00179375	0.00586032
ENSG00000236703.1	3.60551	2.87545	0.479611	5.99539	2.02993e-09	3.60023e-08
ENSG00000259776.1	5.67501	2.87494	0.586659	4.90053	9.55801e-07	8.06928e-06
ENSG00000228613.1	3.15211	2.8614	0.633973	4.51344	6.37833e-06	4.24684e-05
ENSG00000281406.1	280.424	2.85704	0.287637	9.93279	2.99748e-23	8.72817e-21
ENSG00000243766.6	373.222	2.85626	0.41491	6.88404	5.81786e-12	1.89206e-10
ENSG00000279888.1	2.95954	2.85501	0.623114	4.58184	4.60905e-06	3.21835e-05
ENSG00000250838.1	2.26027	2.85428	0.912244	3.12886	0.00175485	0.00574721
ENSG00000233532.4	34.4189	2.84957	0.392837	7.25383	4.05157e-13	1.73201e-11
ENSG00000267243.4	17.7952	2.84319	0.531473	5.34964	8.81315e-08	9.85411e-07
ENSG00000251199.4	1.84142	2.84236	1.18549	2.39763	0.0165016	0.0377313
ENSG00000254337.1	1.96213	2.82863	0.610281	4.63497	3.56998e-06	2.58465e-05
ENSG00000254548.1	10.3579	2.8263	0.387967	7.2849	3.21917e-13	1.3959e-11
ENSG00000276399.1	2.06973	2.8235	0.98534	2.86551	0.00416335	0.0119627
ENSG00000279478.1	1.81741	2.82031	0.791734	3.5622	0.000367762	0.00149653
ENSG00000258010.3	3.19589	2.82011	0.555191	5.07954	3.78353e-07	3.60135e-06
ENSG00000253348.1	72.4055	2.815	0.404008	6.96768	3.22206e-12	1.11373e-10
ENSG00000244649.3	462.366	2.81305	0.362764	7.75448	8.87092e-15	5.44773e-13
ENSG00000224049.1	3.74327	2.80922	0.460667	6.09817	1.07292e-09	2.0702e-08
ENSG00000264404.2	5.76165	2.80561	0.624285	4.49412	6.98592e-06	4.59324e-05
ENSG00000279511.1	14.2178	2.80557	0.579712	4.83959	1.30105e-06	1.05994e-05
ENSG00000228358.4	1.80793	2.80273	0.893059	3.13835	0.00169904	0.00558559
ENSG00000242021.2	2.91052	2.79652	0.736159	3.79879	0.000145402	0.000670763
ENSG00000233589.1	18.8225	2.79223	0.39863	7.00455	2.47772e-12	8.79047e-11
ENSG00000258927.1	11.2436	2.79126	0.694289	4.02032	5.81192e-05	0.000300353
ENSG00000251574.5	4.79184	2.78821	0.57725	4.83016	1.36424e-06	1.10399e-05
ENSG00000261296.1	2.17548	2.78757	0.763989	3.64871	0.000263562	0.00111998
ENSG00000280890.1	4.77151	2.7809	0.536576	5.18267	2.18727e-07	2.20697e-06
ENSG00000256084.1	29.4614	2.77542	0.433384	6.40406	1.51303e-10	3.55431e-09
ENSG00000227964.1	10.0169	2.77319	0.431011	6.43415	1.24167e-10	2.96286e-09
ENSG00000228033.4	3.89593	2.7702	0.5648	4.90474	9.35535e-07	7.93696e-06
ENSG00000270038.1	8.09005	2.76822	0.843538	3.28168	0.00103192	0.00367506
ENSG00000253585.1	4.05107	2.76554	0.52934	5.2245	1.74626e-07	1.79188e-06
ENSG00000229312.2	7.16842	2.76496	0.501374	5.51477	3.49235e-08	4.34675e-07
ENSG00000231083.1	3.40921	2.76136	0.611306	4.51715	6.26786e-06	4.17788e-05
ENSG00000280356.1	5.31558	2.76	0.559364	4.93417	8.04938e-07	6.94589e-06
ENSG00000253414.2	35.2349	2.75994	0.381753	7.22965	4.84229e-13	2.01313e-11
ENSG00000224050.1	16.0196	2.75363	0.379811	7.25001	4.16751e-13	1.76907e-11
ENSG00000271590.1	15.644	2.75041	0.271632	10.1255	4.25807e-24	1.51512e-21
ENSG00000225656.1	3.10698	2.74898	0.550188	4.99643	5.84028e-07	5.26496e-06
ENSG00000274827.3	6.3641	2.7451	0.60599	4.52993	5.90027e-06	3.97005e-05
ENSG00000279220.1	11.0173	2.74398	0.534821	5.13066	2.88722e-07	2.81917e-06
ENSG00000263551.4	6.75738	2.74216	0.648616	4.22771	2.36083e-05	0.000136657
ENSG00000255257.1	2.55012	2.74053	0.791013	3.46459	0.000531046	0.00206446
ENSG00000263520.1	2.7901	2.74012	0.958904	2.85755	0.0042692	0.0122159
ENSG00000250584.2	10.3628	2.73928	0.556632	4.92117	8.60289e-07	7.38664e-06
ENSG00000257761.1	5.71815	2.73833	0.518024	5.28611	1.24946e-07	1.33533e-06
ENSG00000257219.4	11.4574	2.73334	0.350206	7.80495	5.95255e-15	3.75378e-13
ENSG00000225328.1	15.3442	2.73289	0.457647	5.97162	2.34909e-09	4.1009e-08
ENSG00000229494.1	2.72105	2.72726	0.626705	4.35175	1.35054e-05	8.28541e-05
ENSG00000253394.4	3.55719	2.71919	0.596592	4.55787	5.16761e-06	3.53852e-05
ENSG00000254019.1	4.96024	2.71682	0.388987	6.98435	2.86178e-12	9.97745e-11
ENSG00000231221.1	5.62337	2.71105	0.538326	5.03607	4.75177e-07	4.40176e-06
ENSG00000266049.1	10.3921	2.70947	0.434436	6.23674	4.4677e-10	9.36746e-09
ENSG00000249395.2	280.778	2.70834	0.382153	7.08705	1.36997e-12	5.08403e-11
ENSG00000243944.4	17.073	2.70399	0.44956	6.01474	1.80178e-09	3.24374e-08
ENSG00000272727.1	7.53997	2.70015	0.52791	5.11479	3.14087e-07	3.035e-06
ENSG00000233922.2	147.424	2.69751	0.40425	6.67287	2.50849e-11	7.05761e-10
ENSG00000175746.6	5.90288	2.69737	0.421661	6.39701	1.58449e-10	3.70777e-09
ENSG00000231208.4	8.82098	2.6969	0.573279	4.70435	2.54681e-06	1.93053e-05
ENSG00000255871.2	4.88435	2.69484	0.5337	5.04935	4.43319e-07	4.13833e-06
ENSG00000223991.1	2.8508	2.69236	0.579178	4.64859	3.3421e-06	2.4475e-05
ENSG00000258053.1	36.5231	2.69026	0.404465	6.6514	2.90311e-11	8.03809e-10
ENSG00000205628.2	24.7709	2.68493	0.709892	3.78217	0.00015547	0.000710301
ENSG00000232850.3	34.2686	2.68042	0.323808	8.27782	1.25446e-16	1.18566e-14
ENSG00000260725.1	3.68853	2.6753	0.728617	3.67175	0.000240899	0.00103605
ENSG00000253163.1	6.45341	2.67416	0.441333	6.05928	1.36731e-09	2.56064e-08
ENSG00000260710.1	14.0213	2.66488	0.463135	5.75401	8.71526e-09	1.32625e-07
ENSG00000233215.4	3.01159	2.66466	0.823975	3.23391	0.00122109	0.00422006
ENSG00000238042.4	14.2295	2.65756	0.435925	6.09636	1.08512e-09	2.08708e-08
ENSG00000259786.5	9.95886	2.65651	0.513697	5.17135	2.32415e-07	2.32568e-06
ENSG00000227925.1	10.0903	2.65035	0.44208	5.99519	2.03253e-09	3.60023e-08
ENSG00000227143.1	2.22586	2.65015	0.739303	3.58466	0.00033752	0.00139362
ENSG00000256083.1	1.73185	2.64904	0.566193	4.67869	2.88712e-06	2.15341e-05
ENSG00000278012.1	2.32584	2.6489	0.8248	3.21157	0.00132013	0.00449631
ENSG00000261807.2	6.15618	2.6483	0.58902	4.49611	6.92093e-06	4.55794e-05
ENSG00000236081.1	296.941	2.64576	0.364959	7.24945	4.18467e-13	1.77014e-11
ENSG00000280270.1	2.24791	2.64461	0.569077	4.6472	3.36477e-06	2.46261e-05
ENSG00000224649.1	8.14325	2.63703	0.475575	5.54493	2.9407e-08	3.73703e-07
ENSG00000237152.3	16.8901	2.63466	0.271926	9.6889	3.36128e-22	8.65208e-20
ENSG00000261298.1	1.62532	2.63285	0.661206	3.98188	6.83711e-05	0.00034696
ENSG00000254290.1	311.47	2.62774	0.401353	6.54721	5.86219e-11	1.5219e-09
ENSG00000177335.9	273.635	2.62699	0.300628	8.73836	2.36513e-18	2.91973e-16
ENSG00000234828.6	2.96444	2.61428	0.631753	4.13814	3.50133e-05	0.000192629
ENSG00000237862.1	6.17142	2.60978	0.57082	4.57199	4.83122e-06	3.34371e-05
ENSG00000270190.1	25.4176	2.60658	0.28621	9.10723	8.4513e-20	1.4006e-17
ENSG00000224265.1	2.88399	2.59983	0.587499	4.42526	9.63279e-06	6.12067e-05
ENSG00000229118.1	3.03863	2.59612	0.459816	5.64599	1.64233e-08	2.28904e-07
ENSG00000225107.1	2.04359	2.59589	0.619666	4.18917	2.79973e-05	0.000158499
ENSG00000270547.4	122.112	2.59087	0.279431	9.27196	1.82753e-20	3.62451e-18
ENSG00000279379.1	1.52742	2.5815	1.04773	2.46391	0.0137432	0.0323519
ENSG00000272167.2	4.81222	2.57696	0.525468	4.90411	9.38515e-07	7.95109e-06
ENSG00000255921.1	5.46827	2.5729	0.501653	5.12884	2.91528e-07	2.84199e-06
ENSG00000230133.1	1.54911	2.56568	0.689763	3.71966	0.000199492	0.000878897
ENSG00000272798.1	2.59163	2.56557	0.523213	4.9035	9.41435e-07	7.96467e-06
ENSG00000234695.1	4.46421	2.55969	0.60832	4.20781	2.57862e-05	0.00014736
ENSG00000233571.1	2.85393	2.55626	0.793479	3.22158	0.00127485	0.00437412
ENSG00000236502.1	5.55353	2.55484	0.69113	3.69661	0.0002185	0.000950184
ENSG00000249584.1	3.55936	2.54583	0.633278	4.02008	5.81793e-05	0.000300407
ENSG00000253508.1	39.3381	2.54576	0.426093	5.97466	2.30577e-09	4.03835e-08
ENSG00000281566.1	2.18306	2.54417	0.82343	3.08972	0.00200343	0.00644444
ENSG00000258884.1	12.9878	2.54277	0.384737	6.60912	3.86605e-11	1.04401e-09
ENSG00000258125.1	1.81245	2.53823	0.945285	2.68515	0.00724977	0.0190794
ENSG00000234235.1	9.50769	2.53722	0.629188	4.03254	5.51784e-05	0.000287915
ENSG00000279844.1	13.3221	2.53538	0.459915	5.51271	3.53353e-08	4.38898e-07
ENSG00000253877.4	2.60282	2.53316	0.979394	2.58646	0.00969677	0.0243435
ENSG00000226921.5	2.52816	2.53266	0.736094	3.44067	0.000580269	0.00222437
ENSG00000226738.1	18.0877	2.53227	0.390356	6.48708	8.75158e-11	2.17853e-09
ENSG00000260073.2	2.98754	2.52978	0.903121	2.80116	0.00509197	0.0141675
ENSG00000237750.2	1.5915	2.51695	0.965862	2.60591	0.00916319	0.0232208
ENSG00000224099.1	3.2153	2.51208	0.510625	4.91962	8.67133e-07	7.44012e-06
ENSG00000236663.1	6.18491	2.50955	0.57561	4.35981	1.30174e-05	8.0308e-05
ENSG00000278698.1	4.36428	2.50879	0.691762	3.62666	0.000287106	0.00120772
ENSG00000234722.3	11.5962	2.50555	0.507635	4.93574	7.98479e-07	6.9e-06
ENSG00000235005.1	2.39693	2.50539	0.686981	3.64695	0.000265368	0.00112607
ENSG00000258954.1	1.77638	2.50398	0.602363	4.15694	3.22545e-05	0.00017974
ENSG00000256209.1	1.64303	2.50275	0.779694	3.20991	0.00132776	0.00451722
ENSG00000163009.7	55.578	2.50209	0.272801	9.17185	4.64973e-20	8.39588e-18
ENSG00000234497.4	2.33411	2.49551	0.686249	3.63645	0.000276423	0.00116766
ENSG00000258460.1	1.87039	2.49491	0.77701	3.21091	0.00132315	0.00450533
ENSG00000275226.1	2.58433	2.49433	0.701821	3.55409	0.000379291	0.00154137
ENSG00000237031.6	3.38996	2.49335	0.741517	3.36251	0.000772385	0.00285148
ENSG00000241469.6	5.35154	2.49226	0.585372	4.25757	2.06657e-05	0.000121602
ENSG00000249267.5	41.4915	2.49202	0.370254	6.73057	1.69001e-11	4.99895e-10
ENSG00000275649.1	2.78178	2.49013	0.741394	3.35871	0.000783065	0.00288452
ENSG00000219159.4	50.7006	2.48954	0.47336	5.25929	1.4461e-07	1.51471e-06
ENSG00000254933.1	3.83178	2.4891	0.624673	3.98464	6.75829e-05	0.00034338
ENSG00000274269.1	7.32123	2.48771	0.452811	5.49392	3.93106e-08	4.82822e-07
ENSG00000223400.1	4.45803	2.48615	0.531792	4.67505	2.93881e-06	2.18523e-05
ENSG00000231023.5	2.72709	2.48559	0.794491	3.12853	0.00175685	0.00575219
ENSG00000254054.2	4.95807	2.4823	0.487812	5.08863	3.6065e-07	3.45186e-06
ENSG00000254238.1	2.99272	2.48056	0.583188	4.25345	2.10499e-05	0.000123562
ENSG00000241832.1	5.33127	2.47859	0.56722	4.36972	1.24409e-05	7.72636e-05
ENSG00000281327.1	2.15276	2.47494	0.539482	4.58763	4.48296e-06	3.14041e-05
ENSG00000231131.5	7.25647	2.4748	0.608554	4.06669	4.7686e-05	0.000253696
ENSG00000233611.3	2.50155	2.46959	0.712792	3.46468	0.000530872	0.00206445
ENSG00000224853.1	8.83167	2.46566	0.672437	3.66676	0.000245647	0.00105347
ENSG00000230345.1	1.82219	2.46032	0.647667	3.79875	0.00014543	0.000670763
ENSG00000267654.1	13.7537	2.45931	0.490063	5.01836	5.21152e-07	4.77644e-06
ENSG00000265980.1	1.61047	2.45916	0.812783	3.0256	0.00248141	0.00773514
ENSG00000255649.1	6.73508	2.45825	0.354013	6.94397	3.81224e-12	1.28828e-10
ENSG00000226101.1	4.23678	2.45101	0.429424	5.70768	1.14526e-08	1.67944e-07
ENSG00000248215.4	2.55476	2.44669	0.751513	3.25569	0.00113117	0.00396778
ENSG00000223907.1	11.355	2.4431	0.450264	5.42592	5.76567e-08	6.75902e-07
ENSG00000250643.1	6.65014	2.43998	0.433587	5.62744	1.82907e-08	2.49471e-07
ENSG00000235086.1	2.09589	2.43912	0.527912	4.62031	3.83159e-06	2.74775e-05
ENSG00000248870.1	4.02654	2.43882	0.498507	4.89225	9.96902e-07	8.36955e-06
ENSG00000234763.1	1.95036	2.43713	0.677786	3.59572	0.000323489	0.00134328
ENSG00000244675.2	51.2635	2.43699	0.310764	7.84194	4.43648e-15	2.96533e-13
ENSG00000248975.2	1.96474	2.4362	0.76391	3.18912	0.00142707	0.00480508
ENSG00000249807.1	2.07932	2.43393	0.484669	5.02184	5.11777e-07	4.69763e-06
ENSG00000279878.1	9.91389	2.43006	0.520578	4.668	3.04144e-06	2.256e-05
ENSG00000267320.4	1.69752	2.42959	0.772069	3.14686	0.00165033	0.00544916
ENSG00000227012.2	3.02385	2.42958	0.705086	3.44579	0.000569387	0.0021882
ENSG00000259723.1	22.2582	2.42776	0.38858	6.24778	4.16324e-10	8.86611e-09
ENSG00000257671.1	101.251	2.42598	0.359254	6.75282	1.44996e-11	4.3797e-10
ENSG00000278862.1	6.65498	2.42317	0.436661	5.54932	2.86783e-08	3.66367e-07
ENSG00000280225.1	5.99603	2.42225	0.599421	4.04098	5.32278e-05	0.00027925
ENSG00000236719.2	2.83744	2.42031	0.683574	3.54067	0.000399108	0.00160786
ENSG00000248474.1	2.57131	2.41977	0.662119	3.65459	0.000257593	0.00109847
ENSG00000270002.1	2.60131	2.41845	0.568978	4.25052	2.13277e-05	0.00012495
ENSG00000232294.4	1.7978	2.41618	0.7172	3.36891	0.000754665	0.00279545
ENSG00000255440.1	2.01606	2.41407	0.47415	5.09136	3.55508e-07	3.40803e-06
ENSG00000256288.1	1.95247	2.41061	0.524512	4.59591	4.30867e-06	3.03412e-05
ENSG00000249894.1	2.75467	2.40928	0.636671	3.78419	0.000154211	0.000705081
ENSG00000232324.1	26.1426	2.40879	0.360842	6.67547	2.46438e-11	6.94967e-10
ENSG00000232762.1	2.8965	2.40517	0.484174	4.96757	6.77955e-07	5.96936e-06
ENSG00000253658.4	3.72194	2.40147	0.545687	4.40082	1.07842e-05	6.77049e-05
ENSG00000267452.1	12.1568	2.40123	0.364606	6.58583	4.52336e-11	1.20537e-09
ENSG00000259764.1	3.52638	2.40111	0.430106	5.5826	2.36948e-08	3.12606e-07
ENSG00000257654.1	7.05394	2.40048	0.659729	3.63858	0.000274144	0.00116046
ENSG00000257454.1	1.64274	2.40026	0.650704	3.68871	0.00022539	0.00097687
ENSG00000235269.1	4.18925	2.39826	0.539572	4.44475	8.79961e-06	5.64463e-05
ENSG00000280414.1	1.77697	2.39741	0.691188	3.46854	0.000523293	0.00203956
ENSG00000256694.1	48.526	2.39709	0.236311	10.1438	3.53166e-24	1.29473e-21
ENSG00000254142.2	12.1558	2.39465	0.443285	5.40205	6.58842e-08	7.63474e-07
ENSG00000258240.4	2.98021	2.39226	0.625106	3.82696	0.000129734	0.000607635
ENSG00000260209.1	11.6694	2.3901	0.532338	4.48981	7.12857e-06	4.67433e-05
ENSG00000227400.2	2.47984	2.3894	0.73414	3.2547	0.00113513	0.00397936
ENSG00000249345.5	13.2958	2.38935	0.420693	5.67954	1.35055e-08	1.9336e-07
ENSG00000223485.1	25.1509	2.38878	0.312503	7.64401	2.10555e-14	1.18479e-12
ENSG00000270977.1	63.5103	2.3882	0.263879	9.05035	1.42515e-19	2.23914e-17
ENSG00000237423.1	7.4127	2.38748	0.502609	4.75018	2.03237e-06	1.57714e-05
ENSG00000233242.2	2.4724	2.38688	0.5219	4.57344	4.79773e-06	3.32434e-05
ENSG00000253774.1	2.25074	2.38581	0.606689	3.93251	8.40625e-05	0.000415776
ENSG00000271916.1	8.02549	2.38571	0.361188	6.60519	3.97012e-11	1.06734e-09
ENSG00000269376.1	30.143	2.38423	0.399343	5.97038	2.36705e-09	4.12037e-08
ENSG00000268266.1	3.2383	2.3811	0.462729	5.14577	2.6642e-07	2.62685e-06
ENSG00000249425.1	2.18665	2.38006	0.926014	2.57022	0.0101635	0.025347
ENSG00000279401.1	1.5449	2.37925	0.631576	3.76716	0.000165117	0.000745923
ENSG00000242925.1	1.73465	2.37367	0.472258	5.02621	5.00265e-07	4.61297e-06
ENSG00000226782.2	2.57067	2.37334	0.49629	4.78216	1.73421e-06	1.36859e-05
ENSG00000230269.5	5.89453	2.35298	0.659326	3.56876	0.000358672	0.00146645
ENSG00000235180.1	1.52278	2.35213	0.73557	3.1977	0.0013853	0.00468923
ENSG00000275285.1	1.50584	2.35138	0.769396	3.05614	0.00224205	0.00709485
ENSG00000232803.1	387.433	2.35097	0.362199	6.49083	8.53638e-11	2.13374e-09
ENSG00000251061.2	2.88643	2.35088	0.740931	3.17288	0.00150935	0.00503589
ENSG00000236911.5	2.62026	2.35053	0.554175	4.2415	2.22034e-05	0.000129454
ENSG00000233080.2	3.49593	2.33899	0.571266	4.0944	4.23259e-05	0.000227683
ENSG00000271947.1	3.68942	2.33822	0.422717	5.53141	3.17674e-08	3.99919e-07
ENSG00000232936.4	3.37437	2.33401	0.415515	5.61714	1.94139e-08	2.62131e-07
ENSG00000226032.1	1.43431	2.33295	0.541611	4.30743	1.6516e-05	9.94579e-05
ENSG00000205334.2	9.58105	2.32988	0.478523	4.86891	1.12216e-06	9.28584e-06
ENSG00000277247.1	22.7455	2.32917	0.441155	5.27971	1.29391e-07	1.37712e-06
ENSG00000236039.1	72.4602	2.32731	0.39505	5.89119	3.8343e-09	6.37441e-08
ENSG00000238062.4	28.8555	2.32611	0.317315	7.33061	2.291e-13	1.03035e-11
ENSG00000237525.5	5.38002	2.3259	0.571754	4.068	4.74185e-05	0.000252464
ENSG00000257294.2	2.89547	2.32589	0.651383	3.57069	0.000356037	0.00145715
ENSG00000225506.2	20.372	2.32518	0.275879	8.42823	3.50922e-17	3.66022e-15
ENSG00000260217.1	1.47432	2.32202	0.923105	2.51545	0.011888	0.0287957
ENSG00000256916.1	10.2543	2.31976	0.567868	4.08504	4.40693e-05	0.000235909
ENSG00000255595.1	4.96548	2.31888	0.688674	3.36717	0.00075944	0.00281055
ENSG00000250127.1	2.21328	2.31863	0.499656	4.64045	3.47645e-06	2.52905e-05
ENSG00000234698.1	2.04891	2.31807	0.539488	4.29679	1.73288e-05	0.000103938
ENSG00000230033.1	2.51699	2.31804	0.754707	3.07145	0.00213021	0.00679265
ENSG00000227083.1	2.40059	2.31763	0.436194	5.31331	1.07651e-07	1.17224e-06
ENSG00000251604.1	1.76826	2.31732	0.711703	3.25602	0.00112987	0.00396552
ENSG00000249842.1	1.28329	2.31716	0.804291	2.881	0.00396416	0.0114572
ENSG00000203645.2	32.587	2.3164	0.346299	6.68903	2.24652e-11	6.41001e-10
ENSG00000251461.3	1.44874	2.3147	0.728041	3.17935	0.00147607	0.0049371
ENSG00000230001.1	1.36765	2.3141	0.542128	4.26855	1.96745e-05	0.000116449
ENSG00000267123.4	32.6369	2.31148	0.328324	7.04024	1.91906e-12	6.93037e-11
ENSG00000234956.4	2.8839	2.3095	0.477801	4.83361	1.34082e-06	1.08867e-05
ENSG00000272071.1	2.27804	2.30344	0.502138	4.58728	4.49068e-06	3.14399e-05
ENSG00000242207.1	63.8776	2.30139	0.361626	6.36399	1.96573e-10	4.50406e-09
ENSG00000248112.1	2.57398	2.30042	0.642911	3.57813	0.00034606	0.00142354
ENSG00000260172.1	4.35014	2.2987	0.714467	3.21736	0.00129376	0.00442393
ENSG00000230533.1	11.4221	2.29771	0.420111	5.46928	4.51863e-08	5.46664e-07
ENSG00000261873.1	2.58158	2.29756	0.52836	4.34848	1.37085e-05	8.39301e-05
ENSG00000231883.1	3.31687	2.29695	0.656031	3.50128	0.000463022	0.0018348
ENSG00000227619.1	175.529	2.29346	0.366022	6.2659	3.7068e-10	8.09474e-09
ENSG00000226476.2	57.8334	2.29177	0.404032	5.67226	1.40928e-08	2.01054e-07
ENSG00000280444.1	6.86498	2.29031	0.43452	5.27089	1.35765e-07	1.43449e-06
ENSG00000229960.1	3.50139	2.28999	0.616241	3.71606	0.000202352	0.000889231
ENSG00000189229.10	21.6257	2.28981	0.461533	4.96131	7.00192e-07	6.13835e-06
ENSG00000271860.4	2.87192	2.2786	0.634201	3.59287	0.000327055	0.00135504
ENSG00000254687.1	2.30501	2.27707	0.617317	3.68865	0.000225444	0.00097687
ENSG00000235931.2	3.60993	2.2766	0.589182	3.864	0.000111544	0.000531075
ENSG00000248279.4	1.63088	2.27644	0.670945	3.39288	0.000691618	0.00258486
ENSG00000249102.1	1.87306	2.27595	0.728096	3.12589	0.00177268	0.00579776
ENSG00000254166.1	69.0888	2.27544	0.34443	6.6064	3.93779e-11	1.06101e-09
ENSG00000275467.1	1.60224	2.27433	0.47869	4.75114	2.02269e-06	1.57165e-05
ENSG00000248898.1	15.7585	2.27362	0.366202	6.20866	5.34372e-10	1.09759e-08
ENSG00000265000.1	2.53807	2.27192	0.624197	3.63976	0.000272895	0.00115558
ENSG00000253121.1	1.98114	2.26976	0.525207	4.32165	1.5487e-05	9.39157e-05
ENSG00000260264.1	2.97159	2.26886	0.741602	3.0594	0.00221779	0.00703668
ENSG00000260653.4	35.4684	2.268	0.476956	4.75517	1.98279e-06	1.54361e-05
ENSG00000231081.1	15.0697	2.26241	0.276945	8.16916	3.10546e-16	2.68357e-14
ENSG00000228862.3	3.75791	2.26154	0.489717	4.61805	3.87365e-06	2.77298e-05
ENSG00000257831.1	56.391	2.25889	0.340861	6.627	3.42574e-11	9.3766e-10
ENSG00000233098.7	259.899	2.25683	0.34596	6.52339	6.87348e-11	1.75433e-09
ENSG00000254605.1	58.4941	2.25661	0.283322	7.9648	1.65487e-15	1.19884e-13
ENSG00000253307.1	9.12202	2.25404	0.314463	7.16791	7.6151e-13	3.03051e-11
ENSG00000224733.1	5.04874	2.25294	0.366478	6.14756	7.86842e-10	1.55543e-08
ENSG00000266554.1	9.09407	2.25183	0.636741	3.53649	0.000405474	0.00162863
ENSG00000232679.1	33.5439	2.25099	0.458521	4.90924	9.14305e-07	7.78414e-06
ENSG00000259225.5	24.4894	2.25079	0.312703	7.19786	6.11652e-13	2.47484e-11
ENSG00000250274.1	11.1055	2.24788	0.324383	6.9297	4.21729e-12	1.41724e-10
ENSG00000260779.1	1.5318	2.24598	0.667255	3.366	0.000762672	0.00282165
ENSG00000241475.1	1.60183	2.24374	0.719983	3.11638	0.00183086	0.00596386
ENSG00000258763.4	1.70345	2.24268	0.628953	3.56573	0.000362842	0.00148149
ENSG00000223726.1	2.11595	2.24212	0.759923	2.95046	0.00317299	0.00949464
ENSG00000250603.1	5.51128	2.24127	0.566212	3.95836	7.5466e-05	0.000378519
ENSG00000258592.1	10.6681	2.23837	0.43652	5.12776	2.93217e-07	2.85385e-06
ENSG00000260254.1	2.89049	2.23752	0.709541	3.15348	0.00161334	0.00534454
ENSG00000227307.1	1.83828	2.23712	0.565757	3.95421	7.67889e-05	0.000384835
ENSG00000278973.1	8.54781	2.23621	0.410025	5.45385	4.92915e-08	5.89258e-07
ENSG00000225187.1	25.0131	2.23549	0.272078	8.21634	2.09803e-16	1.92287e-14
ENSG00000279191.1	48.5647	2.23454	0.235902	9.47231	2.73712e-21	6.2308e-19
ENSG00000083622.8	8.08086	2.23425	0.49591	4.50536	6.62609e-06	4.39487e-05
ENSG00000236242.1	7.15085	2.23276	0.57529	3.8811	0.000103986	0.00049961
ENSG00000203635.2	5.00073	2.23266	0.581452	3.83981	0.000123131	0.000580303
ENSG00000267892.1	86.4315	2.23018	0.266805	8.35883	6.33435e-17	6.23032e-15
ENSG00000230499.1	8.35016	2.22944	0.284968	7.82346	5.13911e-15	3.3607e-13
ENSG00000259798.1	1.76772	2.22908	0.597859	3.72844	0.000192669	0.0008535
ENSG00000251003.6	86.7364	2.22729	0.363261	6.13136	8.7131e-10	1.69744e-08
ENSG00000257061.1	2.64488	2.22715	0.69791	3.19118	0.00141694	0.00478564
ENSG00000260454.1	1.74275	2.22625	0.537588	4.14118	3.45529e-05	0.000190269
ENSG00000248319.1	3.68573	2.22601	0.522108	4.26351	2.01243e-05	0.000118821
ENSG00000272088.1	19.5936	2.22601	0.304217	7.31718	2.53236e-13	1.12634e-11
ENSG00000237424.1	409.422	2.22589	0.195914	11.3616	6.49735e-30	6.94192e-27
ENSG00000225826.1	2.26722	2.22451	0.582116	3.82142	0.000132683	0.000619291
ENSG00000268756.1	196.437	2.22298	0.40338	5.51088	3.57042e-08	4.43025e-07
ENSG00000276476.2	67.4618	2.22014	0.430519	5.15689	2.51082e-07	2.49391e-06
ENSG00000268812.3	42.0918	2.21928	0.242953	9.13459	6.56563e-20	1.13473e-17
ENSG00000231749.2	15.2573	2.21915	0.431056	5.14819	2.63017e-07	2.59753e-06
ENSG00000261642.1	1.67473	2.21807	0.782112	2.836	0.0045683	0.012931
ENSG00000233625.1	3.71683	2.21627	0.496744	4.46159	8.1354e-06	5.27732e-05
ENSG00000236172.5	2.73395	2.21506	0.832694	2.66011	0.00781146	0.0203407
ENSG00000254100.1	8.13755	2.21454	0.543547	4.07423	4.6167e-05	0.000246265
ENSG00000222030.1	3.64789	2.21302	0.73501	3.01087	0.00260501	0.00805814
ENSG00000262703.1	10.0522	2.20787	0.28958	7.6244	2.45175e-14	1.36061e-12
ENSG00000225030.1	1.46365	2.20324	0.541416	4.06941	4.7133e-05	0.000251196
ENSG00000229876.1	13.1905	2.20067	0.556676	3.95324	7.71002e-05	0.000385756
ENSG00000255094.1	2.15862	2.19922	0.511123	4.30272	1.68714e-05	0.000101497
ENSG00000249923.1	46.905	2.19912	0.416869	5.27533	1.32517e-07	1.40754e-06
ENSG00000260877.1	46.7581	2.19685	0.321586	6.83129	8.41572e-12	2.6445e-10
ENSG00000278998.1	2.43988	2.19533	0.605995	3.62269	0.000291555	0.00122303
ENSG00000253591.1	5.11833	2.19517	0.607935	3.61086	0.000305183	0.00127622
ENSG00000226235.1	11.0174	2.19396	0.383763	5.71695	1.08451e-08	1.59809e-07
ENSG00000225744.1	2.20846	2.19215	0.523351	4.18869	2.80574e-05	0.000158724
ENSG00000235166.6	3.12934	2.19154	0.783955	2.79549	0.00518204	0.0143757
ENSG00000232212.1	1.42939	2.19058	0.74602	2.93636	0.00332088	0.00986157
ENSG00000259862.1	2.10536	2.19001	0.667719	3.27984	0.00103867	0.00369364
ENSG00000223404.3	1.44387	2.18972	0.916362	2.38958	0.0168678	0.0384741
ENSG00000223646.1	1.86177	2.18926	0.645021	3.39408	0.000688585	0.00257432
ENSG00000280023.1	4.09312	2.18789	0.385058	5.68196	1.33162e-08	1.91102e-07
ENSG00000228697.1	10.119	2.18686	0.463705	4.71606	2.4045e-06	1.83415e-05
ENSG00000255274.7	9.02055	2.18113	0.3373	6.46643	1.00344e-10	2.44258e-09
ENSG00000226690.5	8.67652	2.18057	0.430081	5.07014	3.97534e-07	3.76025e-06
ENSG00000242781.1	2.50207	2.17961	0.768228	2.83719	0.00455126	0.0128918
ENSG00000228203.5	58.5103	2.17819	0.260423	8.36406	6.05939e-17	6.00873e-15
ENSG00000279676.1	1.74413	2.17577	0.681921	3.19066	0.0014195	0.00478745
ENSG00000253641.4	50.9359	2.17413	0.322131	6.74922	1.48647e-11	4.45212e-10
ENSG00000230461.7	58.047	2.17214	0.393173	5.52464	3.3016e-08	4.13058e-07
ENSG00000260072.1	8.24416	2.17097	0.480227	4.52072	6.16285e-06	4.12151e-05
ENSG00000242082.1	21.3049	2.1695	0.37595	5.77072	7.89356e-09	1.21342e-07
ENSG00000259831.1	9.12777	2.16325	0.446497	4.84493	1.26659e-06	1.03816e-05
ENSG00000266579.1	1.96099	2.16135	0.435947	4.95783	7.12861e-07	6.22686e-06
ENSG00000248762.2	2.11745	2.16013	0.866342	2.4934	0.0126528	0.0303176
ENSG00000224885.1	4.9245	2.15901	0.354375	6.09244	1.11205e-09	2.13211e-08
ENSG00000263325.1	34.3415	2.15727	0.322192	6.69561	2.14777e-11	6.14273e-10
ENSG00000234948.1	4.62386	2.15619	0.607699	3.54812	0.000387996	0.00156937
ENSG00000278957.1	1.1116	2.15458	0.602395	3.57668	0.00034798	0.00143095
ENSG00000237520.1	4.79944	2.15414	0.439092	4.9059	9.29998e-07	7.90107e-06
ENSG00000258497.1	2.47588	2.15287	0.701731	3.06794	0.00215542	0.00686578
ENSG00000249885.1	11.873	2.15284	0.332908	6.46677	1.00118e-10	2.44199e-09
ENSG00000281756.1	7.45193	2.15154	0.358646	5.99906	1.98464e-09	3.53091e-08
ENSG00000272620.1	3109.29	2.15057	0.457057	4.70525	2.53551e-06	1.92317e-05
ENSG00000231435.1	10.6471	2.14986	0.316712	6.78807	1.13641e-11	3.4894e-10
ENSG00000279387.1	1.48878	2.14834	0.920154	2.33476	0.0195561	0.0435549
ENSG00000230107.1	25.1392	2.14773	0.316551	6.7848	1.16248e-11	3.56043e-10
ENSG00000249815.1	1.99755	2.14722	0.673177	3.18968	0.00142429	0.0047984
ENSG00000267013.4	13.6341	2.14679	0.349119	6.14915	7.78987e-10	1.54242e-08
ENSG00000276121.1	8.07854	2.14518	0.458578	4.6779	2.89821e-06	2.16035e-05
ENSG00000226812.2	133.718	2.14505	0.319284	6.71833	1.83818e-11	5.39764e-10
ENSG00000270182.1	1.58904	2.14274	0.620585	3.45278	0.000554848	0.00214253
ENSG00000258081.3	2.66442	2.14046	0.670885	3.1905	0.00142025	0.00478745
ENSG00000226004.1	7.27776	2.13978	0.42652	5.01684	5.25288e-07	4.80343e-06
ENSG00000265246.1	4.30971	2.13879	0.688016	3.10864	0.00187949	0.00610021
ENSG00000262172.1	15.9012	2.13483	0.296208	7.20721	5.71092e-13	2.32629e-11
ENSG00000238133.5	553.25	2.13471	0.408587	5.22462	1.74516e-07	1.79188e-06
ENSG00000227195.7	17.3534	2.13225	0.372764	5.72011	1.06458e-08	1.57256e-07
ENSG00000250038.4	2.48809	2.13038	0.826259	2.57834	0.00992749	0.0248095
ENSG00000229981.6	5.59383	2.12991	0.588323	3.62031	0.000294256	0.00123394
ENSG00000264956.1	4.63388	2.1287	0.651124	3.26928	0.00107823	0.00381192
ENSG00000130600.14	5086.7	2.1283	0.41574	5.11931	3.0666e-07	2.97035e-06
ENSG00000224903.1	9.98938	2.12708	0.292814	7.26426	3.75074e-13	1.60909e-11
ENSG00000258785.4	2.8122	2.12643	0.741639	2.86721	0.00414112	0.0119085
ENSG00000232746.1	2.06093	2.12249	0.833685	2.54591	0.0108994	0.0268337
ENSG00000223563.1	1.88045	2.12231	0.89435	2.37302	0.0176431	0.0399412
ENSG00000259166.1	1.88652	2.11881	0.660832	3.20628	0.00134465	0.00456698
ENSG00000260135.5	21.4206	2.11679	0.33166	6.3824	1.74332e-10	4.02493e-09
ENSG00000272473.1	10.1837	2.11605	0.32648	6.48141	9.08723e-11	2.24821e-09
ENSG00000219926.9	3.31015	2.11599	0.602592	3.51148	0.000445626	0.00177575
ENSG00000280306.1	1.27085	2.1142	0.778362	2.71621	0.00660331	0.0176624
ENSG00000263724.1	3.10494	2.11333	0.560081	3.77327	0.000161124	0.000731438
ENSG00000247228.2	2.06433	2.11052	0.550425	3.83436	0.000125893	0.000592169
ENSG00000229654.1	2.08292	2.10934	0.664589	3.1739	0.00150406	0.00502238
ENSG00000236030.1	4.12392	2.10763	0.644843	3.26844	0.00108141	0.00382094
ENSG00000249650.1	10.296	2.10743	0.398011	5.29489	1.19086e-07	1.28176e-06
ENSG00000248599.1	7.67167	2.10389	0.482688	4.35869	1.30843e-05	8.05975e-05
ENSG00000280105.1	1.93484	2.10209	0.676068	3.10929	0.00187539	0.00608973
ENSG00000261159.1	38.8895	2.10172	0.33626	6.25028	4.09726e-10	8.77681e-09
ENSG00000237590.1	1.2758	2.09841	0.677554	3.09704	0.00195463	0.00631263
ENSG00000259527.2	1.35213	2.09353	0.709506	2.95069	0.00317063	0.00948994
ENSG00000260636.1	2.64289	2.09146	0.561691	3.72351	0.000196471	0.000867803
ENSG00000280189.1	1.94575	2.09111	0.611388	3.42027	0.000625595	0.00236958
ENSG00000266835.4	38.6634	2.09042	0.255684	8.17579	2.93927e-16	2.55822e-14
ENSG00000269842.3	9.95817	2.08922	0.451844	4.62375	3.76862e-06	2.70741e-05
ENSG00000262001.1	333.556	2.08857	0.208914	9.9973	1.56609e-23	4.85808e-21
ENSG00000233048.1	3.50441	2.08633	0.506667	4.11776	3.82574e-05	0.000207923
ENSG00000237571.1	1.42301	2.08416	0.697368	2.98861	0.00280251	0.00855561
ENSG00000270104.1	2.80657	2.08212	0.418763	4.97207	6.62435e-07	5.85401e-06
ENSG00000236340.4	1.11241	2.07946	0.813809	2.55522	0.0106121	0.0262492
ENSG00000280017.1	2.52339	2.07909	0.690426	3.01131	0.00260123	0.00804972
ENSG00000273838.1	2.31532	2.07841	0.611587	3.39839	0.000677848	0.00254125
ENSG00000227115.5	22.6325	2.07776	0.459756	4.51927	6.20531e-06	4.14304e-05
ENSG00000226194.4	16.6558	2.07504	0.333114	6.22923	4.68744e-10	9.76052e-09
ENSG00000248268.1	6.18086	2.07222	0.446621	4.63978	3.48784e-06	2.53581e-05
ENSG00000279039.1	13.35	2.07177	0.347387	5.96386	2.46343e-09	4.27584e-08
ENSG00000255693.1	9.71021	2.07125	0.371498	5.57541	2.46948e-08	3.24385e-07
ENSG00000244332.1	4.66568	2.07046	0.368251	5.62241	1.88314e-08	2.55406e-07
ENSG00000250822.1	1.52322	2.06987	0.794897	2.60395	0.00921553	0.0233339
ENSG00000257265.1	1.71688	2.06784	0.657752	3.14379	0.00166774	0.00549763
ENSG00000261761.3	4.46537	2.06663	0.810421	2.55007	0.0107703	0.026597
ENSG00000230390.1	1.72444	2.06617	0.601143	3.43706	0.000588058	0.00225137
ENSG00000255026.1	355.194	2.06605	0.302395	6.83231	8.35574e-12	2.63249e-10
ENSG00000240708.1	1.49918	2.06576	0.665114	3.10588	0.00189713	0.00614661
ENSG00000256166.1	2.04891	2.06516	0.736903	2.80248	0.00507113	0.0141198
ENSG00000224854.3	1.6974	2.06347	0.560348	3.68248	0.000230975	0.000997976
ENSG00000226258.5	3.75211	2.0633	0.636786	3.24017	0.00119457	0.00415284
ENSG00000267432.4	22.8945	2.06251	0.313977	6.56897	5.06651e-11	1.34418e-09
ENSG00000245832.5	2.84907	2.0624	0.617242	3.34131	0.000833826	0.00304211
ENSG00000270168.1	6.52536	2.06142	0.486063	4.24106	2.22467e-05	0.000129644
ENSG00000276122.1	13.8574	2.06119	0.676786	3.04556	0.00232248	0.00731703
ENSG00000236658.1	2.43502	2.05988	0.590417	3.48886	0.000485083	0.00190909
ENSG00000281778.1	3.19465	2.05959	0.797123	2.58378	0.00977243	0.0245081
ENSG00000256343.6	1.42181	2.05781	0.761227	2.70329	0.00686575	0.0182313
ENSG00000255847.4	2.40163	2.05767	0.548886	3.74881	0.000177675	0.000794183
ENSG00000270097.1	3.40919	2.05642	0.555155	3.70423	0.000212031	0.000925377
ENSG00000280078.1	4.60988	2.05635	0.426649	4.81977	1.43724e-06	1.15533e-05
ENSG00000233077.1	11.9143	2.05479	0.322654	6.36841	1.91001e-10	4.38469e-09
ENSG00000248837.4	1.96367	2.05409	0.714092	2.87651	0.00402097	0.0116072
ENSG00000279347.1	18.6361	2.05386	0.250431	8.20131	2.3779e-16	2.11528e-14
ENSG00000254044.4	1.45438	2.05359	0.685109	2.99747	0.0027223	0.008376
ENSG00000213981.7	23.8938	2.05351	0.429596	4.78009	1.75214e-06	1.38184e-05
ENSG00000279184.1	154.215	2.05343	0.306561	6.69829	2.10878e-11	6.05985e-10
ENSG00000258657.4	2.69032	2.05202	0.566269	3.62375	0.000290365	0.00122016
ENSG00000253496.2	3.47206	2.05127	0.597053	3.43565	0.000591129	0.00225955
ENSG00000276740.1	5.61258	2.04904	0.517164	3.96207	7.43033e-05	0.000373306
ENSG00000203334.4	1.49799	2.0485	0.57866	3.54008	0.000400003	0.0016104
ENSG00000259254.1	4.09559	2.048	0.365978	5.59597	2.19396e-08	2.91677e-07
ENSG00000229401.1	2.66285	2.04576	0.507538	4.03075	5.55999e-05	0.000289809
ENSG00000250049.4	8.53162	2.04444	0.488907	4.18165	2.89405e-05	0.000163379
ENSG00000233085.4	1.46125	2.04237	0.734926	2.77902	0.00545227	0.0149776
ENSG00000226598.1	28.2423	2.04186	0.428587	4.76417	1.89636e-06	1.48301e-05
ENSG00000233714.1	1.49784	2.04155	0.707498	2.8856	0.00390672	0.0113342
ENSG00000237751.2	2.49219	2.03712	0.713231	2.85619	0.00428753	0.0122539
ENSG00000236651.1	1.82834	2.03604	0.640354	3.17955	0.00147502	0.00493494
ENSG00000253252.2	1.99865	2.03405	0.687458	2.9588	0.00308842	0.00928291
ENSG00000236393.1	23.456	2.03015	0.320132	6.34161	2.27378e-10	5.18046e-09
ENSG00000249835.2	3.76105	2.02649	0.4379	4.62776	3.69643e-06	2.66029e-05
ENSG00000214919.3	7.67975	2.02578	0.324409	6.24452	4.25092e-10	9.00658e-09
ENSG00000235296.1	3.04992	2.02517	0.506877	3.99538	6.45893e-05	0.00032974
ENSG00000226869.5	5.22467	2.02463	0.521699	3.88083	0.0001041	0.000499961
ENSG00000234703.1	1.68931	2.01884	0.519581	3.88551	0.000102115	0.000491794
ENSG00000263041.1	1.192	2.01862	0.79847	2.5281	0.011468	0.028017
ENSG00000278266.1	149.519	2.01834	0.339513	5.94481	2.76783e-09	4.77677e-08
ENSG00000231599.1	2.84469	2.01653	0.642503	3.13855	0.00169786	0.00558474
ENSG00000279134.1	2.47232	2.01628	0.550391	3.66337	0.000248921	0.00106562
ENSG00000258404.1	8.78508	2.01356	0.414812	4.85415	1.20907e-06	9.93026e-06
ENSG00000264448.3	3.67774	2.01213	0.411708	4.88729	1.02235e-06	8.5358e-06
ENSG00000238224.1	1.14848	2.01195	0.526212	3.82346	0.000131593	0.000614676
ENSG00000250974.1	1.26073	2.01129	0.717966	2.80137	0.00508862	0.014162
ENSG00000237574.1	3.3399	2.00984	0.620396	3.23962	0.00119691	0.00415746
ENSG00000237402.1	2.50076	2.00879	0.61605	3.26075	0.00111117	0.00391333
ENSG00000248846.2	4.43043	2.00791	0.477839	4.20206	2.64495e-05	0.000150748
ENSG00000269667.1	5.58244	2.00704	0.535704	3.74655	0.000179284	0.000800067
ENSG00000226620.6	2.34767	2.007	0.719268	2.79033	0.00526539	0.0145688
ENSG00000253361.1	7.03852	2.00568	0.588758	3.40662	0.000657724	0.00247655
ENSG00000227496.1	12.8072	2.00554	0.323823	6.19331	5.89141e-10	1.19588e-08
ENSG00000241369.4	3.2373	2.00541	0.650915	3.08091	0.00206372	0.00660674
ENSG00000236449.1	29.8753	2.00428	0.411937	4.8655	1.14168e-06	9.42799e-06
ENSG00000269927.1	8.58171	2.00357	0.340155	5.89017	3.8579e-09	6.40232e-08
ENSG00000279628.1	5.40298	2.003	0.604451	3.31374	0.000920566	0.00332448
ENSG00000249806.1	14.5351	2.00298	0.391587	5.11502	3.13713e-07	3.03381e-06
ENSG00000234768.1	1.09101	2.00292	0.881405	2.27242	0.023061	0.0499897
ENSG00000253281.5	1.27596	2.00216	0.877307	2.28217	0.0224793	0.048992
ENSG00000250081.1	6.64299	2.00042	0.341894	5.85099	4.88658e-09	7.91404e-08
ENSG00000230479.1	36.9274	2.00003	0.263129	7.60096	2.93952e-14	1.60191e-12
ENSG00000227764.1	1.56593	1.99915	0.621069	3.21889	0.00128689	0.00440621
ENSG00000230768.6	2.43528	1.99716	0.67054	2.97844	0.0028972	0.00879776
ENSG00000259672.1	2.58469	1.99651	0.645657	3.09222	0.00198664	0.00640403
ENSG00000255740.2	1.66512	1.9962	0.694226	2.87543	0.00403478	0.0116387
ENSG00000231772.4	7.21854	1.99581	0.482804	4.13379	3.56825e-05	0.000195687
ENSG00000259396.1	4.78031	1.99512	0.366491	5.44384	5.21454e-08	6.17817e-07
ENSG00000267476.1	7.51985	1.99437	0.390098	5.11249	3.1794e-07	3.06733e-06
ENSG00000251164.1	4.48681	1.99374	0.483457	4.12392	3.7248e-05	0.000203132
ENSG00000280380.1	3.04725	1.99345	0.574705	3.46864	0.000523093	0.00203944
ENSG00000231422.2	12.842	1.99269	0.497341	4.00668	6.15776e-05	0.000316333
ENSG00000277352.1	7.9118	1.99191	0.457142	4.35731	1.31671e-05	8.09843e-05
ENSG00000262585.1	137.008	1.99172	0.254193	7.83546	4.67125e-15	3.07134e-13
ENSG00000250954.4	1.84841	1.98871	0.75808	2.62334	0.00870712	0.0222502
ENSG00000236497.1	1.17036	1.98845	0.694343	2.86379	0.0041861	0.0120093
ENSG00000269446.2	3.13807	1.98661	0.581453	3.41663	0.000634019	0.00239774
ENSG00000280070.1	1.3855	1.98467	0.573202	3.46242	0.000535338	0.00207981
ENSG00000267674.1	1.5318	1.98394	0.520193	3.81385	0.000136819	0.000636386
ENSG00000254417.1	8.67911	1.9836	0.395848	5.01101	5.41437e-07	4.93246e-06
ENSG00000256943.1	7.89981	1.98055	0.516615	3.83371	0.000126224	0.000593264
ENSG00000248550.3	5.18584	1.97987	0.547079	3.61898	0.000295767	0.00123984
ENSG00000260681.1	10.6249	1.9794	0.306634	6.45524	1.08046e-10	2.59869e-09
ENSG00000258952.2	4.58366	1.97917	0.473126	4.18318	2.87463e-05	0.000162359
ENSG00000255079.1	1.51154	1.97656	0.795315	2.48526	0.0129458	0.0309155
ENSG00000242790.1	1.17322	1.97582	0.660367	2.992	0.00277153	0.00849133
ENSG00000230914.2	2.16568	1.97549	0.42443	4.65446	3.24837e-06	2.38898e-05
ENSG00000272827.1	1.69253	1.96993	0.736982	2.67296	0.00751842	0.0196666
ENSG00000250057.1	2.99394	1.96988	0.368054	5.35214	8.69178e-08	9.7274e-07
ENSG00000273409.1	2.64408	1.96831	0.51996	3.78551	0.000153396	0.000702151
ENSG00000262267.4	1.32316	1.9675	0.752495	2.61464	0.00893215	0.0227258
ENSG00000270160.1	2.93471	1.96711	0.426556	4.6116	3.99587e-06	2.84365e-05
ENSG00000256218.1	3.27924	1.96625	0.615322	3.19548	0.00139597	0.00472274
ENSG00000279190.1	1.25162	1.96557	0.685034	2.86929	0.00411389	0.0118471
ENSG00000181211.1	1.6551	1.96329	0.67206	2.92131	0.00348566	0.0102677
ENSG00000250048.1	1.52324	1.963	0.709779	2.76566	0.00568086	0.015514
ENSG00000261275.1	2.26587	1.96075	0.694449	2.82345	0.00475092	0.0133635
ENSG00000226291.1	2.92259	1.96051	0.39158	5.00665	5.53861e-07	5.02295e-06
ENSG00000232518.2	5.22152	1.9595	0.335023	5.84884	4.95015e-09	8.00628e-08
ENSG00000249378.4	10.3004	1.9592	0.461889	4.24171	2.21819e-05	0.000129448
ENSG00000250433.1	2.09472	1.95726	0.600485	3.25946	0.00111625	0.0039234
ENSG00000260585.1	6.40801	1.95683	0.432948	4.51978	6.19026e-06	4.13527e-05
ENSG00000249781.5	3.10346	1.95471	0.59547	3.28264	0.0010284	0.00366576
ENSG00000259828.1	3.49013	1.95344	0.620903	3.14613	0.00165445	0.00546125
ENSG00000280370.1	54.9532	1.95312	0.360195	5.4224	5.88025e-08	6.87336e-07
ENSG00000261080.1	1.61071	1.95248	0.508236	3.84168	0.000122195	0.000576117
ENSG00000253931.1	4.33994	1.95032	0.518589	3.76083	0.000169353	0.000762783
ENSG00000271151.1	28.543	1.94941	0.258409	7.54389	4.56164e-14	2.34837e-12
ENSG00000260126.1	2.91765	1.94711	0.633589	3.07315	0.00211814	0.00676486
ENSG00000237189.1	1.07233	1.94622	0.830388	2.34374	0.0190912	0.042653
ENSG00000269978.1	6.84818	1.94555	0.398413	4.88325	1.04354e-06	8.70071e-06
ENSG00000212939.2	22.5962	1.94536	0.407967	4.76842	1.8568e-06	1.45395e-05
ENSG00000182912.6	181.633	1.94491	0.293704	6.62202	3.54325e-11	9.65867e-10
ENSG00000259268.1	4.96752	1.94436	0.455963	4.26429	2.00539e-05	0.000118551
ENSG00000280707.1	1.47293	1.94351	0.593797	3.27302	0.00106403	0.00376724
ENSG00000259780.3	2.07713	1.9428	0.434153	4.47492	7.64415e-06	4.99077e-05
ENSG00000229522.1	0.98173	1.94266	0.718781	2.70272	0.00687753	0.0182506
ENSG00000237927.1	13.9875	1.94172	0.310297	6.25759	3.90965e-10	8.46134e-09
ENSG00000249699.1	3.61982	1.94138	0.543105	3.5746	0.000350765	0.00144044
ENSG00000249463.1	1.74944	1.94134	0.658421	2.94848	0.00319339	0.00954861
ENSG00000243818.4	1.84444	1.94006	0.671101	2.89086	0.00384186	0.0111701
ENSG00000268833.1	9.38084	1.93903	0.431711	4.4915	7.07227e-06	4.64245e-05
ENSG00000257045.1	1.21609	1.93825	0.546732	3.54515	0.000392392	0.00158291
ENSG00000274238.1	3.7079	1.93739	0.661971	2.92669	0.00342587	0.0101212
ENSG00000214733.7	14.0633	1.93598	0.322274	6.00725	1.887e-09	3.37706e-08
ENSG00000253524.1	1.60828	1.93508	0.790587	2.44765	0.0143791	0.0336087
ENSG00000254235.4	4.78302	1.93491	0.551813	3.50647	0.000454099	0.00180487
ENSG00000275162.1	11.971	1.93476	0.31697	6.10391	1.03504e-09	2.00031e-08
ENSG00000254080.1	1.70549	1.933	0.606438	3.18746	0.00143526	0.00482462
ENSG00000251443.1	2.77604	1.92984	0.58951	3.27363	0.00106175	0.00376025
ENSG00000244578.1	3.89457	1.92975	0.544284	3.54548	0.000391892	0.00158195
ENSG00000231171.3	2.60802	1.92752	0.650155	2.96471	0.00302971	0.00914051
ENSG00000279498.1	1.38615	1.9269	0.545954	3.52942	0.00041647	0.0016667
ENSG00000226673.1	5.80473	1.92379	0.449737	4.27759	1.88931e-05	0.000112485
ENSG00000231407.4	24.0025	1.92279	0.254307	7.56089	4.00309e-14	2.07852e-12
ENSG00000264301.1	1.30586	1.92266	0.780254	2.46415	0.0137338	0.0323442
ENSG00000278913.1	1.30255	1.92227	0.781978	2.45821	0.013963	0.0327881
ENSG00000214725.6	20.5403	1.92168	0.381259	5.04035	4.64683e-07	4.31446e-06
ENSG00000261241.4	1.39423	1.91983	0.702693	2.7321	0.00629312	0.0169639
ENSG00000257258.1	1.52408	1.91818	0.507955	3.77627	0.000159192	0.000724567
ENSG00000280058.1	1.29147	1.91808	0.753739	2.54476	0.0109353	0.026916
ENSG00000273821.1	14.2601	1.9169	0.277436	6.90932	4.8698e-12	1.60531e-10
ENSG00000268889.1	3.56431	1.91541	0.390303	4.9075	9.2243e-07	7.84227e-06
ENSG00000259692.4	20.6413	1.91415	0.49617	3.85785	0.00011439	0.000542701
ENSG00000247867.2	2.19872	1.91294	0.590271	3.24079	0.001192	0.00414868
ENSG00000259847.1	5.36606	1.91187	0.40723	4.69482	2.66841e-06	2.01137e-05
ENSG00000253712.1	3.11096	1.91028	0.442889	4.31322	1.60897e-05	9.73754e-05
ENSG00000249084.1	2.91313	1.90908	0.394012	4.84523	1.26466e-06	1.03798e-05
ENSG00000228826.2	1.3706	1.90876	0.548051	3.48282	0.000496163	0.00194644
ENSG00000269356.1	12.408	1.90657	0.4165	4.5776	4.70335e-06	3.27394e-05
ENSG00000233154.4	10.4259	1.90506	0.295563	6.44552	1.15202e-10	2.75984e-09
ENSG00000234191.1	1.2744	1.9048	0.505503	3.76813	0.000164478	0.000743593
ENSG00000204528.3	93.0058	1.9045	0.321797	5.91831	3.25262e-09	5.48053e-08
ENSG00000215866.6	50.4997	1.90351	0.274509	6.93426	4.08345e-12	1.37609e-10
ENSG00000275437.1	102.684	1.90262	0.222109	8.56617	1.06983e-17	1.25658e-15
ENSG00000233304.4	2.4647	1.90168	0.628196	3.02721	0.00246824	0.00770204
ENSG00000225315.2	11.1464	1.90113	0.359203	5.29265	1.20559e-07	1.29531e-06
ENSG00000272396.1	1.80334	1.90021	0.687679	2.76322	0.00572346	0.0156022
ENSG00000256906.1	1.72389	1.89998	0.616839	3.08019	0.00206872	0.00662099
ENSG00000256443.1	25.2716	1.89872	0.449428	4.22476	2.39198e-05	0.000138195
ENSG00000274080.1	66.7547	1.89804	0.334411	5.67578	1.38054e-08	1.97421e-07
ENSG00000258548.4	2.28043	1.898	0.745244	2.54682	0.0108708	0.0267852
ENSG00000260973.1	1.35179	1.89672	0.581693	3.26068	0.00111144	0.00391333
ENSG00000231226.1	65.7198	1.89576	0.246448	7.69231	1.44501e-14	8.36444e-13
ENSG00000278462.1	5.05928	1.89494	0.337731	5.61078	2.01419e-08	2.71355e-07
ENSG00000256540.1	33.6345	1.89475	0.240067	7.89258	2.96002e-15	2.05189e-13
ENSG00000234022.1	1.01972	1.89444	0.599976	3.15753	0.00159114	0.00527677
ENSG00000227007.1	3.99623	1.89348	0.668197	2.83372	0.00460103	0.0130024
ENSG00000225680.1	16.5731	1.89204	0.40896	4.62647	3.71952e-06	2.67531e-05
ENSG00000278994.1	3.09083	1.89162	0.64557	2.93016	0.00338788	0.0100313
ENSG00000255186.1	2.09829	1.89133	0.485927	3.89222	9.9333e-05	0.000479924
ENSG00000279209.1	2.56367	1.89006	0.708748	2.66675	0.00765885	0.0199864
ENSG00000253821.1	1.18494	1.88764	0.661207	2.85484	0.00430579	0.0122956
ENSG00000230876.5	4.97619	1.88726	0.591111	3.19274	0.00140931	0.0047612
ENSG00000280093.1	1.25741	1.88685	0.77807	2.42503	0.0153069	0.0354554
ENSG00000261798.1	13.9804	1.88672	0.278999	6.76247	1.35662e-11	4.13409e-10
ENSG00000274996.1	1.2404	1.88669	0.548273	3.44115	0.000579257	0.00222119
ENSG00000253301.4	13.8005	1.88655	0.53288	3.54029	0.000399689	0.00160967
ENSG00000231881.1	2.92425	1.88443	0.446564	4.21983	2.44482e-05	0.000140778
ENSG00000226412.1	1.55728	1.88431	0.778767	2.4196	0.0155374	0.0358519
ENSG00000248359.1	3.30522	1.88413	0.708771	2.65831	0.00785332	0.0204225
ENSG00000266278.1	13.2001	1.88394	0.380112	4.95629	7.18506e-07	6.26712e-06
ENSG00000224995.1	1.39121	1.88203	0.510161	3.6891	0.000225051	0.000975867
ENSG00000275549.1	12.8146	1.88196	0.30274	6.21643	5.08606e-10	1.04915e-08
ENSG00000182352.7	23.6708	1.8813	0.523213	3.59568	0.00032355	0.00134328
ENSG00000277210.2	5.05062	1.88086	0.415761	4.52389	6.07137e-06	4.07005e-05
ENSG00000254739.1	16.1931	1.87928	0.423039	4.44233	8.89888e-06	5.70226e-05
ENSG00000242078.1	2.16518	1.87878	0.467257	4.02087	5.79833e-05	0.000299779
ENSG00000272461.1	2.51982	1.8787	0.697608	2.69306	0.00707993	0.0186934
ENSG00000259610.1	2.45491	1.87662	0.654177	2.86867	0.00412203	0.0118677
ENSG00000260569.2	1.2472	1.87575	0.695334	2.69762	0.00698364	0.0184835
ENSG00000254081.1	1.73023	1.87563	0.583759	3.21302	0.00131346	0.00447989
ENSG00000269489.1	4.88027	1.87511	0.346977	5.40413	6.51248e-08	7.56849e-07
ENSG00000249618.4	2.82752	1.87502	0.587969	3.18897	0.00142778	0.00480616
ENSG00000255465.3	3.26993	1.87405	0.399204	4.69448	2.67289e-06	2.01349e-05
ENSG00000203987.2	2.72498	1.87404	0.580603	3.22775	0.00124768	0.0043004
ENSG00000232100.1	1.25544	1.87388	0.742077	2.52518	0.0115638	0.0281934
ENSG00000236481.1	18.3836	1.87297	0.339542	5.51616	3.46492e-08	4.3215e-07
ENSG00000172965.13	1273.41	1.87212	0.159902	11.708	1.16033e-31	1.55974e-28
ENSG00000222032.1	7.94016	1.87118	0.376966	4.9638	6.91279e-07	6.06901e-06
ENSG00000163915.6	41.1421	1.87104	0.260755	7.17547	7.20567e-13	2.88656e-11
ENSG00000227240.1	2.12063	1.87101	0.508748	3.67768	0.000235368	0.00101514
ENSG00000276272.1	6.99561	1.86971	0.335522	5.57254	2.5105e-08	3.27992e-07
ENSG00000230233.1	1.65048	1.86957	0.752181	2.48554	0.0129357	0.0309022
ENSG00000261498.1	1.51438	1.86904	0.607522	3.07649	0.00209454	0.00669832
ENSG00000226203.1	2.6025	1.86771	0.616071	3.03165	0.0024322	0.00761314
ENSG00000260624.1	1.15193	1.86617	0.675452	2.76285	0.00572993	0.0156163
ENSG00000272627.1	9.68932	1.86554	0.322076	5.79223	6.94568e-09	1.08006e-07
ENSG00000248431.1	1.08186	1.8634	0.80427	2.31689	0.0205099	0.0453617
ENSG00000239572.1	2.02898	1.8623	0.571879	3.25645	0.00112816	0.00396067
ENSG00000251331.5	30.9436	1.86071	0.397081	4.68597	2.78639e-06	2.08729e-05
ENSG00000215162.1	1.41446	1.8578	0.614882	3.0214	0.00251608	0.0078271
ENSG00000225156.2	3.90582	1.85772	0.575225	3.22955	0.00123987	0.00427592
ENSG00000265046.1	1.7135	1.85583	0.599585	3.09518	0.0019669	0.00634434
ENSG00000226741.1	4.80417	1.85522	0.609872	3.04199	0.00235022	0.00738519
ENSG00000274508.1	1.75901	1.85516	0.518342	3.57902	0.00034488	0.00142014
ENSG00000247213.5	2.57936	1.85485	0.589694	3.14544	0.00165837	0.00547271
ENSG00000225411.2	7.91883	1.85442	0.407024	4.55605	5.21243e-06	3.56254e-05
ENSG00000234190.1	1.27167	1.85416	0.742476	2.49727	0.0125153	0.0300476
ENSG00000251129.1	6.09436	1.85255	0.654007	2.83262	0.0046168	0.0130378
ENSG00000275294.3	20.376	1.8519	0.333139	5.55895	2.71406e-08	3.49826e-07
ENSG00000260564.1	1.01474	1.84734	0.774922	2.38391	0.01713	0.0390011
ENSG00000278472.1	6.41647	1.84563	0.316734	5.82707	5.64102e-09	8.9326e-08
ENSG00000267134.1	1.41294	1.845	0.759278	2.42994	0.0151012	0.0350325
ENSG00000229402.1	1.02656	1.84405	0.525904	3.50645	0.000454126	0.00180487
ENSG00000266369.1	5.00541	1.84372	0.577816	3.19085	0.00141855	0.00478745
ENSG00000232290.1	3.22159	1.84368	0.370076	4.98191	6.29593e-07	5.61298e-06
ENSG00000267341.1	4.28859	1.84301	0.396465	4.64862	3.3417e-06	2.4475e-05
ENSG00000203585.3	8.63247	1.84291	0.363379	5.07158	3.94518e-07	3.73465e-06
ENSG00000279300.1	1.23532	1.84057	0.621589	2.96107	0.00306573	0.00923076
ENSG00000234928.1	15.8239	1.83904	0.513815	3.57919	0.000344662	0.00141972
ENSG00000278709.1	207.952	1.83874	0.284748	6.45741	1.06508e-10	2.57193e-09
ENSG00000269072.1	7.86477	1.83759	0.429663	4.27681	1.8959e-05	0.000112766
ENSG00000232188.1	1.19943	1.83527	0.730649	2.51184	0.0120103	0.0290484
ENSG00000204044.6	22.1205	1.8351	0.282811	6.48879	8.65273e-11	2.15837e-09
ENSG00000271156.1	3.52079	1.83504	0.546361	3.35865	0.00078324	0.00288452
ENSG00000260944.1	1.50121	1.83484	0.58369	3.14351	0.00166932	0.00549985
ENSG00000225667.1	3.74634	1.83465	0.574536	3.19328	0.00140668	0.00475503
ENSG00000254592.1	0.99192	1.83451	0.655806	2.79734	0.00515247	0.0143133
ENSG00000255050.1	42.5591	1.8341	0.303729	6.03863	1.55429e-09	2.85163e-08
ENSG00000272397.1	1.21551	1.83336	0.626997	2.92404	0.00345521	0.010188
ENSG00000278153.1	5.01667	1.83271	0.332313	5.51501	3.48756e-08	4.34526e-07
ENSG00000259807.1	31.9269	1.83148	0.241617	7.5801	3.45296e-14	1.84026e-12
ENSG00000254545.1	3.73411	1.83087	0.373974	4.8957	9.79545e-07	8.23526e-06
ENSG00000233033.1	5.03522	1.83018	0.334224	5.47592	4.35246e-08	5.30273e-07
ENSG00000253642.4	10.1455	1.82909	0.57017	3.20798	0.00133673	0.00454644
ENSG00000233491.5	1.96028	1.82833	0.692043	2.64192	0.00824363	0.0212692
ENSG00000259504.2	2.12087	1.82794	0.526525	3.4717	0.000517179	0.00201768
ENSG00000260785.1	1.71324	1.82787	0.763053	2.39546	0.0165994	0.0379293
ENSG00000188280.10	2.43827	1.8267	0.618197	2.95488	0.00312789	0.0093829
ENSG00000246350.1	4.36425	1.82613	0.55385	3.29715	0.00097671	0.00350526
ENSG00000253433.1	2.3497	1.82584	0.474939	3.84436	0.000120867	0.000570842
ENSG00000275278.1	3.18832	1.82572	0.411245	4.4395	9.01699e-06	5.76877e-05
ENSG00000251665.1	1.7747	1.82553	0.443578	4.11548	3.86377e-05	0.000209708
ENSG00000253573.1	2.3983	1.82514	0.486524	3.75138	0.000175861	0.000787404
ENSG00000251642.1	1.41079	1.82426	0.694061	2.62838	0.00857928	0.0219852
ENSG00000274976.1	31.6918	1.824	0.250365	7.28535	3.20827e-13	1.3959e-11
ENSG00000272945.1	13.9768	1.82324	0.235056	7.75663	8.72145e-15	5.38327e-13
ENSG00000099869.7	9.04675	1.8223	0.484987	3.75742	0.000171677	0.000770667
ENSG00000272068.1	293.62	1.82123	0.316648	5.75158	8.84138e-09	1.34174e-07
ENSG00000236513.1	1.18102	1.81939	0.716196	2.54035	0.0110742	0.0271922
ENSG00000257114.2	4.47105	1.81653	0.506643	3.58542	0.000336535	0.00139051
ENSG00000267530.2	52.7868	1.81649	0.265731	6.8358	8.15505e-12	2.58272e-10
ENSG00000251350.1	34.7644	1.81635	0.529637	3.42942	0.000604871	0.00230335
ENSG00000260740.2	26.0391	1.81634	0.309233	5.87368	4.26236e-09	7.01578e-08
ENSG00000265554.1	5.39784	1.81631	0.670147	2.71032	0.00672182	0.0179199
ENSG00000249734.1	1.43246	1.81577	0.542234	3.34868	0.000811965	0.00297401
ENSG00000273615.1	4.70734	1.81522	0.499147	3.63665	0.000276211	0.00116717
ENSG00000239322.1	2.6512	1.81339	0.525597	3.45014	0.000560287	0.00215802
ENSG00000258773.1	0.990732	1.81294	0.622849	2.91072	0.00360597	0.0105809
ENSG00000266578.1	4.55271	1.8126	0.55502	3.26582	0.00109146	0.00385306
ENSG00000261697.4	3.99817	1.81248	0.437367	4.14407	3.41188e-05	0.000188393
ENSG00000230010.1	4.48646	1.81216	0.445475	4.06793	4.74336e-05	0.000252464
ENSG00000234477.1	9.0415	1.81064	0.495963	3.65075	0.000261479	0.0011123
ENSG00000232283.1	2.94536	1.81048	0.432109	4.18986	2.79121e-05	0.000158164
ENSG00000229425.1	7.16879	1.81	0.339306	5.33444	9.58416e-08	1.06375e-06
ENSG00000237073.1	7.63321	1.80922	0.284018	6.37008	1.88925e-10	4.34528e-09
ENSG00000271736.1	2.76647	1.80746	0.549333	3.29029	0.00100085	0.00358234
ENSG00000258609.2	1.6242	1.80531	0.543319	3.32275	0.000891347	0.00322763
ENSG00000257407.1	1.89674	1.80344	0.637263	2.82998	0.0046551	0.0131368
ENSG00000206249.3	1.64985	1.80341	0.4649	3.87912	0.000104834	0.000503088
ENSG00000251533.2	36.6465	1.80279	0.366654	4.91686	8.79412e-07	7.52413e-06
ENSG00000257925.1	7.63842	1.80267	0.406849	4.43081	9.38781e-06	5.97128e-05
ENSG00000256001.1	59.9661	1.80186	0.358875	5.02085	5.14429e-07	4.7184e-06
ENSG00000232445.1	157.047	1.80159	0.28319	6.36177	1.99443e-10	4.56117e-09
ENSG00000244342.4	4.86512	1.80138	0.443037	4.06597	4.78328e-05	0.000254142
ENSG00000273138.1	6.55704	1.80127	0.339951	5.2986	1.16693e-07	1.25824e-06
ENSG00000241280.1	2.47252	1.80095	0.532094	3.38464	0.000712717	0.00265961
ENSG00000233891.6	1.89805	1.80084	0.603216	2.9854	0.00283212	0.00863482
ENSG00000279705.1	3.39869	1.79878	0.503497	3.57257	0.0003535	0.00144873
ENSG00000249306.4	19.572	1.79866	0.43309	4.15309	3.28014e-05	0.000182192
ENSG00000239589.4	1.28069	1.79607	0.748896	2.3983	0.0164716	0.0376698
ENSG00000251072.2	4.05472	1.79514	0.45392	3.95476	7.6612e-05	0.000384108
ENSG00000280257.1	2.64998	1.7936	0.642989	2.78947	0.00527939	0.0145989
ENSG00000226994.6	2.22498	1.79093	0.709901	2.52279	0.0116429	0.0283241
ENSG00000229664.1	3.28796	1.79066	0.420348	4.25995	2.04472e-05	0.000120492
ENSG00000274863.1	4.02477	1.79043	0.443937	4.03307	5.50519e-05	0.000287535
ENSG00000262772.1	30.389	1.7897	0.305775	5.85297	4.82858e-09	7.85164e-08
ENSG00000273568.1	32.9903	1.78935	0.190015	9.41688	4.64685e-21	9.86274e-19
ENSG00000274718.1	8.28188	1.78881	0.454304	3.93748	8.23415e-05	0.000409104
ENSG00000257894.2	21.0973	1.78868	0.290172	6.16421	7.08352e-10	1.41881e-08
ENSG00000226320.4	5.43986	1.7886	0.652373	2.74168	0.00611258	0.0165436
ENSG00000260922.1	1.59315	1.78754	0.598969	2.98436	0.00284168	0.0086596
ENSG00000264647.1	1.61624	1.78623	0.540627	3.30399	0.000953202	0.00343107
ENSG00000250509.1	5.61815	1.78529	0.484285	3.68644	0.000227414	0.000983643
ENSG00000278924.1	6.54445	1.78379	0.359129	4.96699	6.80006e-07	5.98307e-06
ENSG00000224635.1	29.8231	1.78318	0.252746	7.05523	1.72319e-12	6.24167e-11
ENSG00000261729.1	4.31016	1.78301	0.501654	3.55426	0.00037905	0.00154091
ENSG00000273325.1	7.05459	1.78055	0.383266	4.64574	3.38865e-06	2.4756e-05
ENSG00000253983.2	2.81852	1.77963	0.416886	4.26886	1.96477e-05	0.000116347
ENSG00000224939.1	6.88612	1.77802	0.370141	4.80363	1.55815e-06	1.24426e-05
ENSG00000237259.1	1.54658	1.77731	0.46181	3.84858	0.000118806	0.000562111
ENSG00000261634.3	10.0317	1.77685	0.405815	4.37846	1.19519e-05	7.44179e-05
ENSG00000272301.1	16.3527	1.77596	0.255575	6.94891	3.6813e-12	1.25102e-10
ENSG00000273365.1	2.96181	1.77527	0.414972	4.27805	1.88539e-05	0.000112307
ENSG00000274507.1	3.0705	1.7743	0.423679	4.18784	2.81624e-05	0.00015921
ENSG00000278254.3	3.52306	1.7743	0.698397	2.54053	0.0110686	0.0271894
ENSG00000226674.7	58.4773	1.77385	0.313731	5.65404	1.56718e-08	2.20206e-07
ENSG00000274414.1	79.914	1.7734	0.277694	6.38617	1.70095e-10	3.93462e-09
ENSG00000253167.1	11.6444	1.77335	0.241136	7.35417	1.92118e-13	8.80397e-12
ENSG00000253426.4	40.8238	1.77258	0.325078	5.4528	4.95839e-08	5.91001e-07
ENSG00000224397.4	338.997	1.77256	0.236783	7.48603	7.09881e-14	3.51973e-12
ENSG00000273106.1	1.78168	1.77155	0.430497	4.11514	3.86945e-05	0.000209922
ENSG00000233817.1	10.8141	1.77149	0.335531	5.27966	1.29425e-07	1.37712e-06
ENSG00000254972.1	5.73585	1.7713	0.45437	3.89837	9.68422e-05	0.000469014
ENSG00000261175.4	30.3062	1.77003	0.500337	3.53768	0.000403661	0.00162274
ENSG00000223806.6	21.0092	1.76846	0.473298	3.73646	0.000186632	0.000828578
ENSG00000196421.6	107.517	1.76812	0.26473	6.67894	2.40683e-11	6.81917e-10
ENSG00000253438.2	32.9292	1.76669	0.235967	7.48704	7.04457e-14	3.50721e-12
ENSG00000228709.1	164.582	1.76655	0.367956	4.80098	1.57894e-06	1.26003e-05
ENSG00000226097.4	3.95368	1.7639	0.582263	3.02939	0.00245046	0.00766039
ENSG00000273443.1	7.18634	1.76284	0.397844	4.43098	9.38055e-06	5.9698e-05
ENSG00000205592.12	26.2705	1.76271	0.448873	3.92696	8.60262e-05	0.000423814
ENSG00000268333.1	4.33491	1.76089	0.565628	3.11315	0.00185102	0.0060214
ENSG00000236116.1	0.939701	1.76008	0.682164	2.58014	0.00987612	0.0247066
ENSG00000224184.4	10.1187	1.7585	0.44387	3.96176	7.44003e-05	0.000373639
ENSG00000249574.1	41.3701	1.75846	0.346107	5.0807	3.76055e-07	3.5823e-06
ENSG00000259666.2	1.1723	1.75845	0.752369	2.33722	0.0194275	0.0433043
ENSG00000249697.1	1.13801	1.75801	0.66907	2.62754	0.00860038	0.0220159
ENSG00000279962.1	1.57338	1.75779	0.484241	3.62998	0.000283442	0.00119464
ENSG00000237013.1	1.58273	1.75739	0.60979	2.88196	0.00395209	0.0114302
ENSG00000259306.2	8.96076	1.75676	0.402623	4.36328	1.28129e-05	7.92485e-05
ENSG00000279286.2	65.0378	1.75658	0.306328	5.73431	9.79074e-09	1.46052e-07
ENSG00000229649.1	4.52055	1.75617	0.583035	3.01211	0.00259435	0.00803338
ENSG00000263637.1	1.06223	1.75588	0.591017	2.97094	0.00296886	0.00898381
ENSG00000223815.1	1.28995	1.75582	0.488626	3.59338	0.000326414	0.00135285
ENSG00000273112.1	1.87348	1.75456	0.526885	3.33007	0.00086825	0.0031506
ENSG00000273301.1	23.3017	1.75279	0.46465	3.77228	0.000161765	0.000733793
ENSG00000225952.1	5.40048	1.75151	0.422779	4.14286	3.43008e-05	0.000189225
ENSG00000272524.1	8.17533	1.7511	0.2832	6.18325	6.2796e-10	1.26618e-08
ENSG00000280305.1	2.38993	1.75088	0.713972	2.4523	0.0141945	0.0332284
ENSG00000266850.1	19.7317	1.75078	0.314953	5.55887	2.71522e-08	3.49826e-07
ENSG00000237009.2	11.3062	1.74909	0.423642	4.1287	3.64826e-05	0.000199533
ENSG00000248339.1	3.57235	1.74885	0.679777	2.57268	0.0100913	0.0251825
ENSG00000235038.1	1.78549	1.74859	0.708205	2.46905	0.0135474	0.032014
ENSG00000259082.1	1.1401	1.74814	0.687676	2.5421	0.0110188	0.0270891
ENSG00000255433.4	1.91418	1.74756	0.67259	2.59826	0.00936973	0.0236649
ENSG00000224707.1	3.04068	1.74663	0.397699	4.39185	1.12392e-05	7.03426e-05
ENSG00000253505.1	3.89229	1.74537	0.530719	3.28869	0.00100656	0.00359841
ENSG00000240922.1	11.2643	1.74494	0.419891	4.15569	3.24308e-05	0.000180473
ENSG00000246465.1	23.6627	1.74271	0.353621	4.92817	8.30022e-07	7.13182e-06
ENSG00000237208.1	1.06389	1.74203	0.672226	2.59143	0.00955787	0.0240529
ENSG00000238280.1	2.7208	1.74191	0.441125	3.9488	7.85433e-05	0.000392652
ENSG00000231646.4	8.65764	1.74128	0.347205	5.01513	5.29977e-07	4.84051e-06
ENSG00000246366.5	71.1378	1.74018	0.190783	9.12122	7.4282e-20	1.24814e-17
ENSG00000230817.4	1.91894	1.7397	0.601232	2.89356	0.00380896	0.0110825
ENSG00000260913.1	4.05926	1.73926	0.592229	2.9368	0.00331618	0.00985277
ENSG00000276980.1	162.358	1.73913	0.313182	5.5531	2.80653e-08	3.59675e-07
ENSG00000254815.4	129.645	1.73709	0.253909	6.84139	7.84285e-12	2.49036e-10
ENSG00000259907.1	2.46236	1.73308	0.556729	3.11297	0.00185215	0.00602347
ENSG00000236653.1	1.96091	1.7316	0.730408	2.37073	0.0177529	0.0401599
ENSG00000228705.1	75.012	1.73059	0.345569	5.00794	5.50148e-07	4.99302e-06
ENSG00000269321.1	2.35407	1.72994	0.406793	4.25262	2.11284e-05	0.000123903
ENSG00000233845.1	14.3355	1.72951	0.281942	6.13429	8.55382e-10	1.6745e-08
ENSG00000260420.2	2.41959	1.72949	0.600313	2.88099	0.00396427	0.0114572
ENSG00000280217.1	22.1241	1.72926	0.468995	3.68716	0.000226773	0.000981225
ENSG00000261373.1	715.855	1.72854	0.228451	7.56636	3.83833e-14	2.00156e-12
ENSG00000253961.1	3.93573	1.72695	0.337867	5.11131	3.19924e-07	3.08402e-06
ENSG00000279442.1	1.70415	1.72615	0.679299	2.54108	0.0110511	0.0271547
ENSG00000269043.1	2.66707	1.72603	0.554949	3.11025	0.00186928	0.00607266
ENSG00000272904.1	3.74209	1.7258	0.462318	3.73292	0.000189275	0.000839696
ENSG00000280335.1	13.4971	1.72565	0.359004	4.80676	1.53393e-06	1.22735e-05
ENSG00000224322.1	26.7235	1.72463	0.458604	3.76061	0.000169502	0.000762886
ENSG00000278849.1	2.03957	1.72414	0.688612	2.50379	0.0122872	0.0296011
ENSG00000226398.1	1.60538	1.72399	0.565482	3.04871	0.00229829	0.00725403
ENSG00000278929.1	2.33613	1.72138	0.581975	2.95782	0.00309821	0.00930541
ENSG00000221845.4	2.1599	1.72105	0.562451	3.0599	0.00221409	0.00702862
ENSG00000183470.8	2.25974	1.72036	0.591972	2.90614	0.00365913	0.0107161
ENSG00000261751.1	1.38779	1.7188	0.710008	2.42082	0.0154854	0.0357592
ENSG00000229205.2	4.01566	1.71865	0.745371	2.30576	0.0211239	0.0464904
ENSG00000265728.1	4.82507	1.71791	0.475365	3.61387	0.000301655	0.00126277
ENSG00000277229.1	2.52809	1.71697	0.532651	3.22345	0.00126657	0.00435207
ENSG00000225964.4	21.2245	1.71654	0.29956	5.7302	1.00314e-08	1.49274e-07
ENSG00000248150.1	2.47181	1.71529	0.592295	2.896	0.00377953	0.0110101
ENSG00000258869.1	2.32635	1.71511	0.562321	3.05006	0.00228799	0.00722529
ENSG00000228262.7	5.99984	1.71215	0.516764	3.31321	0.00092232	0.00332883
ENSG00000251230.4	31.4975	1.71093	0.306221	5.58723	2.30716e-08	3.05049e-07
ENSG00000281664.1	1.49709	1.7107	0.658198	2.59907	0.00934778	0.0236292
ENSG00000203721.4	10.4717	1.70985	0.316607	5.40054	6.64421e-08	7.68467e-07
ENSG00000234142.1	3.30633	1.7097	0.428173	3.99303	6.52356e-05	0.000332443
ENSG00000267734.1	11.2045	1.70967	0.295731	5.78116	7.4188e-09	1.14627e-07
ENSG00000257596.1	32.2078	1.70814	0.212452	8.04012	8.97537e-16	7.00542e-14
ENSG00000259676.1	2.28362	1.70669	0.43743	3.90163	9.55486e-05	0.000464325
ENSG00000259713.1	1.96629	1.70523	0.420248	4.05768	4.95631e-05	0.000262413
ENSG00000258169.1	2.65745	1.70473	0.55445	3.07464	0.00210757	0.00673464
ENSG00000260487.1	8.14651	1.70295	0.346865	4.90954	9.12917e-07	7.78328e-06
ENSG00000262358.1	6.72988	1.70293	0.313699	5.42856	5.68115e-08	6.67287e-07
ENSG00000279114.1	20.9987	1.7019	0.237524	7.16515	7.76994e-13	3.08199e-11
ENSG00000266446.1	2.20557	1.70019	0.480375	3.53929	0.000401198	0.0016136
ENSG00000279674.1	4.37622	1.69926	0.623895	2.72363	0.00645682	0.0173241
ENSG00000256146.1	9.38561	1.6978	0.561548	3.02342	0.00249935	0.00778412
ENSG00000223631.1	8.04276	1.69753	0.451146	3.7627	0.000168092	0.000758231
ENSG00000231217.1	5.34384	1.69612	0.412779	4.10903	3.97319e-05	0.000214972
ENSG00000278239.1	9.21937	1.69585	0.508427	3.33548	0.000851523	0.00310013
ENSG00000278890.1	2.31375	1.6958	0.678691	2.49864	0.0124671	0.0299438
ENSG00000279655.1	4.30246	1.69531	0.558353	3.03628	0.0023952	0.00750507
ENSG00000230400.1	5.40284	1.69497	0.356698	4.75183	2.01585e-06	1.56734e-05
ENSG00000236833.1	10.2277	1.69469	0.401415	4.22179	2.42373e-05	0.00013983
ENSG00000229921.5	31.7678	1.69444	0.5168	3.27872	0.00104279	0.00370506
ENSG00000269974.1	23.9731	1.6943	0.23224	7.29548	2.97606e-13	1.2998e-11
ENSG00000274995.1	2.58451	1.6932	0.429643	3.94095	8.11603e-05	0.000404398
ENSG00000259814.1	1.33879	1.69238	0.656009	2.57981	0.00988554	0.0247251
ENSG00000235890.2	97.8654	1.69139	0.311249	5.43422	5.50371e-08	6.49598e-07
ENSG00000274877.1	121.8	1.69124	0.279646	6.04779	1.46849e-09	2.71864e-08
ENSG00000261121.1	13.2202	1.69113	0.452494	3.73736	0.000185965	0.000825921
ENSG00000254450.1	2.01403	1.69089	0.430722	3.92571	8.64751e-05	0.000425448
ENSG00000251538.4	3.52503	1.69024	0.519239	3.25522	0.00113305	0.00397324
ENSG00000236673.4	2.62392	1.69008	0.551608	3.06391	0.00218464	0.00694972
ENSG00000274038.1	8.15651	1.68904	0.274452	6.15424	7.54386e-10	1.50108e-08
ENSG00000227744.4	4.09823	1.68881	0.622771	2.71177	0.0066926	0.0178499
ENSG00000277545.1	6.1223	1.68873	0.300194	5.62546	1.8501e-08	2.51685e-07
ENSG00000236772.1	40.8796	1.68838	0.210769	8.01056	1.14192e-15	8.63431e-14
ENSG00000226779.1	4.27961	1.68793	0.443618	3.80493	0.000141845	0.000657235
ENSG00000258776.1	1.79052	1.68659	0.737015	2.28841	0.0221138	0.0482998
ENSG00000249295.1	2.47079	1.6859	0.428308	3.93618	8.27891e-05	0.000411159
ENSG00000266924.1	1.44937	1.68493	0.597549	2.81973	0.00480646	0.0134919
ENSG00000231533.1	2.56416	1.68411	0.558496	3.01544	0.00256604	0.00796593
ENSG00000236700.4	18.179	1.68317	0.335131	5.02242	5.10255e-07	4.69078e-06
ENSG00000279907.1	5.27739	1.68148	0.397074	4.23468	2.28879e-05	0.000132996
ENSG00000235448.1	9.14275	1.68141	0.316452	5.31331	1.07651e-07	1.17224e-06
ENSG00000280997.1	4.63515	1.67957	0.438478	3.83045	0.000127907	0.00060012
ENSG00000267557.1	3.17129	1.6791	0.416626	4.03024	5.572e-05	0.000290185
ENSG00000270816.4	10.7814	1.67869	0.658944	2.54754	0.0108486	0.0267521
ENSG00000259293.1	2.90397	1.67798	0.430454	3.89817	9.69231e-05	0.000469218
ENSG00000254207.1	4.48112	1.676	0.364635	4.59638	4.29889e-06	3.03077e-05
ENSG00000269534.4	10.5006	1.67417	0.253245	6.61088	3.82036e-11	1.03397e-09
ENSG00000268496.1	11.6488	1.6739	0.380158	4.40316	1.06687e-05	6.70839e-05
ENSG00000236908.2	9.03405	1.67194	0.428281	3.90383	9.46839e-05	0.000461146
ENSG00000280081.2	7.64166	1.67161	0.575855	2.90283	0.0036981	0.0108084
ENSG00000279771.1	1.35906	1.67001	0.560337	2.98036	0.00287908	0.00875153
ENSG00000254222.1	1.24821	1.6685	0.67323	2.47834	0.0131994	0.0314157
ENSG00000279845.1	5.85651	1.66843	0.312631	5.33674	9.46303e-08	1.05224e-06
ENSG00000227121.1	8.09558	1.66762	0.723801	2.30398	0.0212236	0.0466504
ENSG00000270460.1	17.6235	1.66737	0.357941	4.65823	3.1894e-06	2.34704e-05
ENSG00000254246.1	1.66847	1.66647	0.440754	3.78096	0.000156226	0.000712949
ENSG00000256714.1	1.05597	1.66622	0.644542	2.58512	0.00973458	0.0244283
ENSG00000248323.4	60.5546	1.66556	0.306599	5.43238	5.56079e-08	6.55696e-07
ENSG00000258268.1	1.8795	1.66541	0.478181	3.48281	0.000496183	0.00194644
ENSG00000267943.1	10.7646	1.66492	0.395392	4.2108	2.54473e-05	0.000145699
ENSG00000265289.1	1.05435	1.66299	0.527832	3.1506	0.00162933	0.00539307
ENSG00000267625.1	1.60876	1.66293	0.632595	2.62875	0.00856991	0.0219658
ENSG00000236790.4	28.4525	1.66264	0.234753	7.08251	1.41564e-12	5.23449e-11
ENSG00000253532.1	3.4663	1.65894	0.35301	4.69941	2.60912e-06	1.97529e-05
ENSG00000225762.1	38.6845	1.65872	0.227096	7.30405	2.79226e-13	1.22839e-11
ENSG00000269967.1	18.3316	1.65806	0.223069	7.43292	1.06222e-13	5.1403e-12
ENSG00000281344.1	308.87	1.65784	0.210085	7.89128	2.99107e-15	2.05602e-13
ENSG00000261135.1	17.0167	1.65712	0.299671	5.5298	3.20592e-08	4.02754e-07
ENSG00000279527.1	2.54746	1.65658	0.382573	4.3301	1.49043e-05	9.06093e-05
ENSG00000223715.1	1.76493	1.65607	0.619649	2.67259	0.0075269	0.0196802
ENSG00000260930.1	1.51343	1.65363	0.655426	2.52299	0.0116361	0.0283225
ENSG00000146521.8	68.0572	1.6536	0.298757	5.53492	3.11369e-08	3.92975e-07
ENSG00000255525.1	0.837059	1.65222	0.654392	2.52481	0.011576	0.0282123
ENSG00000279121.1	2.36351	1.65216	0.419859	3.93502	8.31887e-05	0.000412297
ENSG00000275191.1	6.2905	1.65201	0.317576	5.20194	1.97217e-07	2.00794e-06
ENSG00000276931.1	16.5365	1.65169	0.224159	7.3684	1.7269e-13	8.06643e-12
ENSG00000270919.1	27.1566	1.65168	0.425801	3.87899	0.00010489	0.000503154
ENSG00000260132.1	2.85987	1.65157	0.395006	4.18114	2.90054e-05	0.000163669
ENSG00000253174.2	2.20015	1.65146	0.418824	3.9431	8.0436e-05	0.000401615
ENSG00000255308.1	3.99357	1.65102	0.358782	4.60174	4.18985e-06	2.96599e-05
ENSG00000225173.1	7.1118	1.65077	0.36949	4.4677	7.90651e-06	5.1454e-05
ENSG00000280639.1	7.1074	1.65056	0.344989	4.78438	1.71512e-06	1.35441e-05
ENSG00000224167.1	44.1786	1.64923	0.290239	5.68232	1.32879e-08	1.90923e-07
ENSG00000257845.1	1.35396	1.64843	0.71372	2.30963	0.0209087	0.0460668
ENSG00000224810.1	5.49792	1.64753	0.499605	3.29768	0.000974888	0.00349976
ENSG00000233017.2	15.7897	1.64729	0.38761	4.24986	2.13905e-05	0.000125258
ENSG00000271936.1	87.3561	1.64547	0.156009	10.5472	5.2307e-26	2.53124e-23
ENSG00000254757.1	7.5676	1.64444	0.351603	4.67696	2.91152e-06	2.16894e-05
ENSG00000247844.1	523.08	1.64324	0.325718	5.04498	4.53557e-07	4.21439e-06
ENSG00000229021.2	12.9858	1.64282	0.333326	4.92856	8.28392e-07	7.12288e-06
ENSG00000227463.2	3.5995	1.64069	0.590044	2.78061	0.00542562	0.0149181
ENSG00000264026.1	6.43064	1.64034	0.375465	4.36882	1.2492e-05	7.75414e-05
ENSG00000276672.1	125.646	1.63875	0.18139	9.03437	1.64945e-19	2.52596e-17
ENSG00000272619.1	3.60375	1.63857	0.607579	2.69688	0.0069992	0.0185166
ENSG00000234556.1	1.20466	1.63816	0.655577	2.49881	0.012461	0.0299352
ENSG00000259697.1	1.40232	1.63746	0.620732	2.63795	0.00834084	0.0214926
ENSG00000273313.1	3.61539	1.63649	0.508474	3.21844	0.00128889	0.00441105
ENSG00000236046.1	1.11626	1.63441	0.658985	2.4802	0.013131	0.0312934
ENSG00000196273.6	1.59196	1.63181	0.691873	2.35854	0.0183469	0.0413105
ENSG00000235824.4	6.35274	1.63161	0.471906	3.45749	0.000545233	0.00211151
ENSG00000255375.1	1.11288	1.6303	0.550659	2.96064	0.00307	0.00923902
ENSG00000270823.1	13.9109	1.63005	0.228686	7.12789	1.01916e-12	3.90184e-11
ENSG00000241180.1	2.5702	1.62995	0.541988	3.00735	0.00263535	0.00813951
ENSG00000275016.3	3.80883	1.62851	0.619269	2.62973	0.0085452	0.0219211
ENSG00000261177.1	5.86692	1.62518	0.444248	3.65827	0.000253926	0.00108474
ENSG00000261670.1	20.3838	1.62484	0.346379	4.69092	2.71982e-06	2.04502e-05
ENSG00000233397.1	0.824996	1.62479	0.654452	2.48268	0.0130399	0.0311095
ENSG00000260239.1	12.6984	1.62448	0.47394	3.4276	0.000608935	0.00231809
ENSG00000215417.9	99.5663	1.62288	0.225413	7.19956	6.04083e-13	2.45242e-11
ENSG00000274943.1	16.6758	1.62201	0.231548	7.00505	2.46895e-12	8.78509e-11
ENSG00000272720.1	116.014	1.62191	0.185065	8.76398	1.88478e-18	2.35073e-16
ENSG00000254278.1	2.07242	1.62093	0.498792	3.24971	0.00115525	0.00404286
ENSG00000264808.1	7.60573	1.62014	0.306145	5.29206	1.20948e-07	1.29834e-06
ENSG00000231918.1	3.21815	1.61959	0.668661	2.42213	0.0154297	0.0356715
ENSG00000235407.1	14.2295	1.61911	0.50248	3.22223	0.00127195	0.00436605
ENSG00000230105.1	4.07728	1.61765	0.394335	4.10223	4.09195e-05	0.000220805
ENSG00000260441.4	2.72179	1.61752	0.363045	4.45544	8.37215e-06	5.41348e-05
ENSG00000265096.1	14.7937	1.61581	0.369592	4.37187	1.23187e-05	7.65441e-05
ENSG00000226876.2	4.95909	1.61567	0.322484	5.01009	5.4406e-07	4.95124e-06
ENSG00000227388.2	39.074	1.61534	0.17468	9.24745	2.29915e-20	4.34612e-18
ENSG00000203999.7	61.1922	1.61444	0.276477	5.83933	5.241e-09	8.3981e-08
ENSG00000273786.1	7.02877	1.61441	0.323829	4.98537	6.18446e-07	5.52582e-06
ENSG00000231674.1	0.987021	1.61286	0.694931	2.32089	0.0202927	0.0449717
ENSG00000280053.1	2.24356	1.61286	0.436422	3.69565	0.000219328	0.000953236
ENSG00000235415.1	2.15949	1.60949	0.581985	2.76552	0.00568327	0.0155171
ENSG00000228980.3	6.25067	1.60897	0.525869	3.05964	0.00221606	0.00703303
ENSG00000229167.1	64.1106	1.6076	0.241508	6.65651	2.80404e-11	7.79846e-10
ENSG00000230836.1	10.4517	1.6069	0.407879	3.93965	8.16002e-05	0.000405921
ENSG00000262837.1	4.05999	1.60681	0.333136	4.82327	1.41223e-06	1.13674e-05
ENSG00000234147.1	23.2735	1.60551	0.423933	3.78718	0.000152365	0.000698225
ENSG00000272259.4	8.92702	1.6051	0.487947	3.28949	0.00100369	0.00359143
ENSG00000243885.1	8.13134	1.60443	0.352025	4.55772	5.17119e-06	3.53852e-05
ENSG00000234418.1	1.92014	1.60343	0.468143	3.42508	0.000614624	0.00233387
ENSG00000255521.1	19.1387	1.60324	0.345658	4.63823	3.51401e-06	2.55177e-05
ENSG00000265334.1	6.11355	1.60273	0.29527	5.428	5.69879e-08	6.6871e-07
ENSG00000278060.1	0.950346	1.60224	0.591933	2.70679	0.00679378	0.018064
ENSG00000271757.1	3.44019	1.60206	0.356049	4.49957	6.80921e-06	4.49906e-05
ENSG00000280418.1	2.68107	1.6015	0.556569	2.87744	0.00400914	0.0115758
ENSG00000265766.2	2.22369	1.60145	0.478173	3.34911	0.000810713	0.00297122
ENSG00000222012.1	19.9924	1.60059	0.357457	4.47773	7.54426e-06	4.92821e-05
ENSG00000256325.1	8.95914	1.59948	0.296239	5.3993	6.68998e-08	7.73022e-07
ENSG00000230523.1	2.19659	1.59842	0.572335	2.7928	0.00522533	0.0144792
ENSG00000255322.1	11.3148	1.59663	0.258014	6.18817	6.08683e-10	1.23141e-08
ENSG00000279298.1	4.10773	1.59598	0.58933	2.70813	0.00676637	0.0180069
ENSG00000180066.8	74.1269	1.59478	0.336762	4.73563	2.18377e-06	1.67848e-05
ENSG00000255910.1	5.96901	1.59153	0.466314	3.413	0.000642514	0.0024238
ENSG00000249484.7	3.03516	1.59068	0.583081	2.72805	0.00637101	0.0171319
ENSG00000251365.1	2.15345	1.59065	0.464537	3.42417	0.000616671	0.00233944
ENSG00000238272.1	1.15968	1.59011	0.605031	2.62814	0.00858532	0.021996
ENSG00000237654.4	5.09685	1.58993	0.65265	2.43611	0.0148462	0.0345337
ENSG00000266957.1	2.67113	1.5891	0.419524	3.78786	0.000151949	0.000697109
ENSG00000215869.3	3.88829	1.58873	0.511269	3.10742	0.00188725	0.00612117
ENSG00000269720.1	8.01736	1.587	0.341183	4.65145	3.29604e-06	2.4211e-05
ENSG00000249131.1	1.43133	1.58511	0.487662	3.25043	0.00115229	0.00403367
ENSG00000236008.1	140.463	1.5848	0.198024	8.00305	1.21378e-15	9.06437e-14
ENSG00000280719.1	3.95601	1.58431	0.541815	2.92408	0.0034548	0.010188
ENSG00000233124.1	3.25926	1.5833	0.453927	3.488	0.00048664	0.00191397
ENSG00000256199.1	1.33394	1.58264	0.596456	2.6534	0.00796852	0.0206741
ENSG00000233288.1	4.02787	1.58256	0.597964	2.64659	0.00813088	0.0210322
ENSG00000266908.1	1.01146	1.58229	0.632152	2.50302	0.0123139	0.0296347
ENSG00000233387.1	1.30335	1.58043	0.559909	2.82266	0.00476267	0.0133904
ENSG00000223979.2	1.63304	1.58025	0.450693	3.50626	0.000454448	0.0018055
ENSG00000268686.1	65.7063	1.57963	0.381112	4.1448	3.40105e-05	0.000187881
ENSG00000234377.6	10.9322	1.57886	0.2834	5.57114	2.53078e-08	3.29467e-07
ENSG00000278995.1	4.51177	1.57861	0.35467	4.45093	8.54987e-06	5.50779e-05
ENSG00000254444.1	2.22405	1.57776	0.458443	3.44156	0.00057838	0.00221853
ENSG00000280420.1	4.73687	1.57678	0.354197	4.45171	8.51909e-06	5.49382e-05
ENSG00000277790.1	0.86566	1.57549	0.649551	2.4255	0.0152872	0.0354231
ENSG00000225953.2	20.8863	1.57518	0.304797	5.16796	2.36664e-07	2.36235e-06
ENSG00000196758.3	1.61502	1.57495	0.575089	2.73862	0.00616973	0.0166759
ENSG00000231150.4	4.08436	1.57439	0.423141	3.72073	0.000198648	0.000875816
ENSG00000279201.1	1.31953	1.57392	0.609304	2.58314	0.00979047	0.0245431
ENSG00000272218.1	1.95454	1.57266	0.580754	2.70795	0.00676998	0.0180126
ENSG00000187621.13	48.4198	1.57232	0.423071	3.71644	0.000202048	0.000888542
ENSG00000248995.2	0.992905	1.57115	0.600539	2.61624	0.00889037	0.0226433
ENSG00000259240.1	18.4548	1.57095	0.328753	4.7785	1.76605e-06	1.39099e-05
ENSG00000258183.4	2.41725	1.57085	0.590849	2.65863	0.00784598	0.0204131
ENSG00000259731.2	0.912558	1.5702	0.586111	2.67902	0.00738374	0.0193603
ENSG00000264735.1	1.49634	1.5698	0.61143	2.56741	0.010246	0.0255212
ENSG00000246541.2	2.52295	1.56932	0.578895	2.7109	0.00671017	0.0178928
ENSG00000254208.1	8.50497	1.56906	0.262322	5.98145	2.21166e-09	3.90038e-08
ENSG00000269037.1	2.32452	1.56854	0.595953	2.63198	0.00848894	0.0218045
ENSG00000231896.1	1.40496	1.56831	0.589453	2.66061	0.00779981	0.0203148
ENSG00000232498.1	32.1221	1.56736	0.296695	5.28272	1.2728e-07	1.35908e-06
ENSG00000262786.1	1.65303	1.56723	0.591812	2.6482	0.00809221	0.0209366
ENSG00000257137.4	1.27971	1.56676	0.632668	2.47642	0.0132706	0.0315231
ENSG00000246334.2	60.4754	1.56558	0.190674	8.21076	2.19793e-16	1.99929e-14
ENSG00000186148.10	6.01264	1.56505	0.477991	3.27423	0.00105951	0.00375452
ENSG00000266411.1	3.95995	1.56503	0.421013	3.71729	0.000201373	0.000886217
ENSG00000235726.4	23.9042	1.56402	0.251366	6.22209	4.90577e-10	1.01801e-08
ENSG00000258885.1	0.982694	1.56323	0.641483	2.4369	0.0148138	0.0344666
ENSG00000249859.6	985.113	1.56274	0.185889	8.40682	4.21259e-17	4.28268e-15
ENSG00000249007.1	141.808	1.56272	0.238494	6.55246	5.65953e-11	1.48201e-09
ENSG00000233068.2	0.879507	1.56231	0.584514	2.67284	0.00752129	0.0196698
ENSG00000259717.1	3.72152	1.56182	0.353958	4.41243	1.02216e-05	6.46087e-05
ENSG00000259380.4	2.12744	1.56167	0.535132	2.91829	0.00351953	0.0103574
ENSG00000260430.1	19.1266	1.5614	0.279149	5.59341	2.22652e-08	2.95032e-07
ENSG00000240596.1	1.23571	1.56135	0.666477	2.34269	0.0191454	0.0427502
ENSG00000226965.1	1.36933	1.56093	0.56331	2.77099	0.00558866	0.0153002
ENSG00000231654.1	1.49942	1.56037	0.484249	3.22224	0.00127192	0.00436605
ENSG00000256597.2	2.2546	1.55854	0.683388	2.28062	0.0225712	0.0491481
ENSG00000225096.1	4.82179	1.55843	0.477341	3.26483	0.00109531	0.00386442
ENSG00000260196.1	390.664	1.55814	0.231958	6.71732	1.85093e-11	5.41911e-10
ENSG00000232416.3	4.04417	1.55634	0.521535	2.98416	0.0028436	0.00866249
ENSG00000262152.5	19.2313	1.55508	0.296255	5.24914	1.52812e-07	1.58153e-06
ENSG00000278895.1	1.43127	1.55443	0.614385	2.53006	0.0114044	0.027869
ENSG00000231842.1	6.81745	1.55251	0.294923	5.26411	1.40867e-07	1.48064e-06
ENSG00000238284.1	1.7695	1.55202	0.671275	2.31205	0.0207752	0.0458311
ENSG00000236733.1	1.41847	1.55061	0.472626	3.28084	0.00103497	0.00368485
ENSG00000280344.1	2.20197	1.54961	0.550097	2.81697	0.00484784	0.0135825
ENSG00000203650.6	13.9658	1.5491	0.310442	4.98997	6.03895e-07	5.40778e-06
ENSG00000269646.1	17.5158	1.54824	0.256985	6.02461	1.69514e-09	3.06086e-08
ENSG00000232139.4	2.22355	1.54807	0.511132	3.02872	0.00245593	0.00767351
ENSG00000254338.1	2.8169	1.54692	0.571447	2.70702	0.00678895	0.0180551
ENSG00000251027.1	0.831021	1.5463	0.659646	2.34413	0.0190713	0.0426399
ENSG00000237401.5	3.92376	1.54629	0.672388	2.2997	0.0214654	0.0470706
ENSG00000272662.1	3.84581	1.54621	0.347721	4.44671	8.71958e-06	5.60148e-05
ENSG00000265415.1	174.525	1.54555	0.181383	8.52089	1.58328e-17	1.82424e-15
ENSG00000281196.1	2.09037	1.54516	0.608223	2.54045	0.0110708	0.0271894
ENSG00000273415.1	2.42202	1.5451	0.518076	2.98237	0.00286023	0.00869862
ENSG00000224865.6	1.43053	1.54501	0.547797	2.8204	0.00479637	0.0134726
ENSG00000263321.1	6.8861	1.54498	0.282948	5.46031	4.75312e-08	5.70469e-07
ENSG00000269951.1	59.5905	1.54471	0.215368	7.17242	7.36839e-13	2.94201e-11
ENSG00000232519.2	3.38319	1.54457	0.339791	4.54565	5.47664e-06	3.72018e-05
ENSG00000226088.1	7.80328	1.54402	0.396794	3.89123	9.97379e-05	0.000481688
ENSG00000272205.1	25.034	1.54396	0.199978	7.72063	1.15758e-14	6.89872e-13
ENSG00000234232.5	1.80881	1.54355	0.471884	3.27105	0.00107151	0.00379149
ENSG00000229373.7	3.81922	1.54328	0.483887	3.18934	0.00142599	0.00480281
ENSG00000236643.1	7.14576	1.54277	0.306737	5.02963	4.91429e-07	4.54187e-06
ENSG00000271659.1	10.3694	1.54229	0.324493	4.75292	2.005e-06	1.5599e-05
ENSG00000273036.2	58.3444	1.54196	0.358434	4.30195	1.69303e-05	0.000101801
ENSG00000228386.2	8.89913	1.54187	0.254953	6.04766	1.46966e-09	2.71864e-08
ENSG00000249717.1	5.52818	1.54095	0.428777	3.59381	0.000325876	0.00135154
ENSG00000280376.1	3.9831	1.54082	0.310018	4.97009	6.69207e-07	5.90092e-06
ENSG00000253392.2	26.0901	1.5408	0.305239	5.04785	4.46814e-07	4.16132e-06
ENSG00000251688.1	3.81288	1.54057	0.466716	3.30088	0.000963829	0.00346314
ENSG00000243083.4	19.2322	1.53979	0.287463	5.35647	8.48617e-08	9.53256e-07
ENSG00000224714.2	4.14216	1.53858	0.528088	2.9135	0.00357405	0.0104898
ENSG00000225146.1	1.9667	1.53834	0.431109	3.56833	0.000359262	0.00146836
ENSG00000198685.3	1.92947	1.53584	0.563816	2.72401	0.00644945	0.0173082
ENSG00000223390.1	2.92129	1.5355	0.34244	4.484	7.3257e-06	4.79061e-05
ENSG00000227076.1	26.0437	1.53519	0.264966	5.79392	6.87618e-09	1.07063e-07
ENSG00000233321.1	1.71339	1.53481	0.632552	2.42637	0.0152506	0.035352
ENSG00000214999.3	41.9485	1.53417	0.332547	4.6134	3.96136e-06	2.82408e-05
ENSG00000273032.1	18.9021	1.53366	0.348149	4.4052	1.05689e-05	6.6491e-05
ENSG00000231295.1	0.99499	1.53326	0.5493	2.7913	0.00524966	0.0145369
ENSG00000254631.4	8.89752	1.5331	0.284659	5.38572	7.21546e-08	8.25852e-07
[truncated: 2,088 more rows]

## Sheet: Table S4
Table S4. Differentially expressed ferroptosis-related genes.
[truncated: 60 more rows]

[truncated: 4 more sheets: Table S5, Table S6, Table S7, Table S8]
